# Supplementary material for: Silent Witness: Dual-Species Transcriptomics Reveals Epithelial Immunological Quiescence to Helminth Larval Encounter and Fostered Larval Development
Source: Front Immunol. 2018 Aug 15;9:1868. doi: 10.3389/fimmu.2018.01868 (PMC6104121; doi:10.3389/fimmu.2018.01868)
Supplement: Table S2 — Co-expression analysis: GEN nodes, GEN edges, GEN cluster. [file table_2.xlsx]

## Sheet: GEN Nodes
Name	Degree	Interconnected	MCODE_Cluster	Origin	Sequence.Description
IPECJ2_ENSSSCG00000029034	56	true	Cluster 1	IPEC_J2	cytochrome c oxidase subunit 4I1 [Source:HGNC Symbol;Acc:HGNC:2265]
IPECJ2_ENSSSCG00000025928	56	true	Cluster 1	IPEC_J2	ribosomal protein L18 [Source:HGNC Symbol;Acc:HGNC:10310]
IPECJ2_ENSSSCG00000007472	52	true	Cluster 1	IPEC_J2	breast carcinoma amplified sequence 4 [Source:HGNC Symbol;Acc:HGNC:14367]
IPECJ2_ENSSSCG00000029362	50	true	Cluster 1	IPEC_J2	charged multivesicular body protein 2A [Source:HGNC Symbol;Acc:HGNC:30216]
IPECJ2_ENSSSCG00000013267	49	true	Cluster 1	IPEC_J2	peroxisomal biogenesis factor 16 [Source:HGNC Symbol;Acc:HGNC:8857]
IPECJ2_ENSSSCG00000012965	47	true	Cluster 1	IPEC_J2	DR1 associated protein 1 [Source:HGNC Symbol;Acc:HGNC:3019]
IPECJ2_ENSSSCG00000024974	46	true	Cluster 1	IPEC_J2	ribosomal protein L13 [Source:HGNC Symbol;Acc:HGNC:10303]
IPECJ2_ENSSSCG00000026812	46	true	Cluster 1	IPEC_J2	Unknown
IPECJ2_ENSSSCG00000027971	46	true	Cluster 1	IPEC_J2	regulatory factor X associated ankyrin containing protein [Source:HGNC Symbol;Acc:HGNC:9987]
IPECJ2_ENSSSCG00000029161	46	true	Cluster 1	IPEC_J2	acireductone dioxygenase 1 [Source:HGNC Symbol;Acc:HGNC:30576]
IPECJ2_ENSSSCG00000012784	45	true	Cluster 1	IPEC_J2	signal sequence receptor subunit 4 [Source:HGNC Symbol;Acc:HGNC:11326]
IPECJ2_ENSSSCG00000020790	44	true	Cluster 1	IPEC_J2	Uncharacterized protein OS=Sus scrofa GN=MYEOV2 PE=1 SV=1
IPECJ2_XLOC_029898	42	true	Cluster 1	IPEC_J2	Proteasome subunit beta type-7 OS=Sus scrofa GN=PSMB7 PE=2 SV=2
IPECJ2_ENSSSCG00000020817	41	true	Cluster 1	IPEC_J2	40S ribosomal protein S16 [Source:UniProtKB/Swiss-Prot;Acc:Q29201]
IPECJ2_ENSSSCG00000001884	40	true	Cluster 1	IPEC_J2	COMM domain containing 4 [Source:HGNC Symbol;Acc:HGNC:26027]
IPECJ2_ENSSSCG00000019018	40	true	Cluster 1	IPEC_J2	Unknown
IPECJ2_ENSSSCG00000006777	40	true	Cluster 2	IPEC_J2	ras homolog family member C [Source:HGNC Symbol;Acc:HGNC:669]
IPECJ2_ENSSSCG00000007646	39	true	Cluster 1	IPEC_J2	late endosomal/lysosomal adaptor, MAPK and MTOR activator 4 [Source:HGNC Symbol;Acc:HGNC:33772]
AscL3_gene_GS_12056	39	true	Cluster 1	AscL3	Elongation of very long chain fatty acids protein OS=Ascaris suum GN=ASU_11627 PE=3 SV=1
IPECJ2_ENSSSCG00000000061	39	true	Cluster 1	IPEC_J2	phosphomannomutase 1 [Source:HGNC Symbol;Acc:HGNC:9114]
IPECJ2_ENSSSCG00000027840	39	true	Cluster 1	IPEC_J2	Unknown
IPECJ2_ENSSSCG00000001423	38	true	Cluster 1	IPEC_J2	negative elongation factor complex member E [Source:HGNC Symbol;Acc:HGNC:13974]
IPECJ2_ENSSSCG00000029830	38	true	Cluster 1	IPEC_J2	ribosomal protein L8 [Source:HGNC Symbol;Acc:HGNC:10368]
IPECJ2_ENSSSCG00000012842	37	true	Cluster 1	IPEC_J2	Unknown
IPECJ2_ENSSSCG00000026914	37	true	Cluster 2	IPEC_J2	phospholipase A2 group XVI [Source:HGNC Symbol;Acc:HGNC:17825]
IPECJ2_ENSSSCG00000022647	36	true	Cluster 1	IPEC_J2	translocase of inner mitochondrial membrane 17 homolog B (yeast) [Source:HGNC Symbol;Acc:HGNC:17310]
IPECJ2_ENSSSCG00000027353	35	true	Cluster 1	IPEC_J2	Unknown
IPECJ2_ENSSSCG00000017705	33	true	Cluster 1	IPEC_J2	C-C motif chemokine ligand 5 [Source:HGNC Symbol;Acc:HGNC:10632]
IPECJ2_ENSSSCG00000021825	32	true	Cluster 1	IPEC_J2	40S ribosomal protein S21 [Source:UniProtKB/Swiss-Prot;Acc:P63221]
IPECJ2_ENSSSCG00000012960	32	true	Cluster 1	IPEC_J2	cystatin E/M [Source:HGNC Symbol;Acc:HGNC:2478]
IPECJ2_ENSSSCG00000004970	32	true	Cluster 1	IPEC_J2	Unknown
IPECJ2_ENSSSCG00000025868	32	true	Cluster 2	IPEC_J2	Unknown
IPECJ2_ENSSSCG00000023139	31	true	Cluster 1	IPEC_J2	Isoform 2 of Methyltransferase-like protein 23 OS=Homo sapiens GN=METTL23
IPECJ2_ENSSSCG00000007160	31	true	Cluster 1	IPEC_J2	DDRGK domain containing 1 [Source:HGNC Symbol;Acc:HGNC:16110]
IPECJ2_ENSSSCG00000013619	31	true	Cluster 2	IPEC_J2	SWIM-type zinc finger 7 associated protein 1 [Source:HGNC Symbol;Acc:HGNC:26638]
IPECJ2_ENSSSCG00000023325	30	true	Cluster 2	IPEC_J2	Aminoacylase-1 [Source:UniProtKB/Swiss-Prot;Acc:P37111]
IPECJ2_ENSSSCG00000010063	29	true	Cluster 1	IPEC_J2	Macrophage migration inhibitory factor OS=Sus scrofa GN=MIF PE=1 SV=3
IPECJ2_ENSSSCG00000010631	28	true	Cluster 1	IPEC_J2	glycerol-3-phosphate acyltransferase, mitochondrial [Source:HGNC Symbol;Acc:HGNC:24865]
AscL3_gene_GS_09942	28	true	Cluster 2	AscL3	Sperm-specific protein OS=Ascaris suum GN=ASU_04668 PE=4 SV=1
IPECJ2_ENSSSCG00000029855	28	true	Cluster 2	IPEC_J2	lipoma HMGIC fusion partner [Source:HGNC Symbol;Acc:HGNC:6586]
IPECJ2_ENSSSCG00000007189	28	true	Cluster 2	IPEC_J2	syndecan binding protein 2 [Source:HGNC Symbol;Acc:HGNC:15756]
IPECJ2_ENSSSCG00000012727	27	true	Cluster 1	IPEC_J2	fragile X mental retardation 1 [Source:HGNC Symbol;Acc:HGNC:3775]
IPECJ2_ENSSSCG00000012916	26	true	Cluster 1	IPEC_J2	Unknown
IPECJ2_XLOC_011183	26	true	Cluster 1	IPEC_J2	Inosine triphosphate pyrophosphatase OS=Bos taurus GN=ITPA PE=2 SV=1
IPECJ2_ENSSSCG00000014177	26	true	Cluster 2	IPEC_J2	chromodomain helicase DNA binding protein 1 [Source:HGNC Symbol;Acc:HGNC:1915]
IPECJ2_XLOC_007562	26	true	Cluster 2	IPEC_J2	Unknown
AscL3_gene_GS_11251	26	true	Cluster 5	AscL3	Uncharacterized protein OS=Ascaris suum GN=ASU_01462 PE=4 SV=1
IPECJ2_ENSSSCG00000015786	25	true	Cluster 2	IPEC_J2	Unknown
IPECJ2_ENSSSCG00000010865	24	true	Cluster 1	IPEC_J2	exonuclease 1 [Source:HGNC Symbol;Acc:HGNC:3511]
IPECJ2_ENSSSCG00000024254	24	true	Cluster 2	IPEC_J2	alkB homolog 7 [Source:HGNC Symbol;Acc:HGNC:21306]
IPECJ2_ENSSSCG00000027827	24	true	Cluster 2	IPEC_J2	UDP-galactose-4-epimerase [Source:HGNC Symbol;Acc:HGNC:4116]
IPECJ2_ENSSSCG00000017114	24	true	Cluster 2	IPEC_J2	NADH:ubiquinone oxidoreductase subunit S6 [Source:HGNC Symbol;Acc:HGNC:7713]
IPECJ2_ENSSSCG00000007281	23	true	Cluster 2	IPEC_J2	microtubule associated protein 1 light chain 3 alpha [Source:HGNC Symbol;Acc:HGNC:6838]
AscL3_gene_L3E_01572	23	true	Cluster 4	AscL3	Bm1034 OS=Brugia malayi GN=Bm1034 PE=4 SV=1
IPECJ2_ENSSSCG00000023110	23	true	Cluster 9	IPEC_J2	UBX domain protein 1 [Source:HGNC Symbol;Acc:HGNC:18402]
IPECJ2_ENSSSCG00000027308	22	true	Cluster 2	IPEC_J2	Unknown
IPECJ2_ENSSSCG00000012905	22	true		IPEC_J2	transmembrane protein 134 [Source:HGNC Symbol;Acc:HGNC:26142]
IPECJ2_ENSSSCG00000014076	20	true	Cluster 5	IPEC_J2	Isoform 2 of Soluble lamin-associated protein of 75 kDa OS=Homo sapiens GN=FAM169A
IPECJ2_ENSSSCG00000003080	19	true	Cluster 9	IPEC_J2	immunoglobulin superfamily member 23 [Source:HGNC Symbol;Acc:HGNC:40040]
IPECJ2_ENSSSCG00000013002	19	true		IPEC_J2	FAU, ubiquitin like and ribosomal protein S30 fusion [Source:HGNC Symbol;Acc:HGNC:3597]
IPECJ2_ENSSSCG00000001922	18	true	Cluster 5	IPEC_J2	ariadne RBR E3 ubiquitin protein ligase 1 [Source:HGNC Symbol;Acc:HGNC:689]
IPECJ2_ENSSSCG00000017308	18	true	Cluster 5	IPEC_J2	cell division cycle 27 [Source:HGNC Symbol;Acc:HGNC:1728]
IPECJ2_ENSSSCG00000007331	17	true	Cluster 5	IPEC_J2	RB transcriptional corepressor like 1 [Source:HGNC Symbol;Acc:HGNC:9893]
IPECJ2_XLOC_005381	17	true	Cluster 9	IPEC_J2	Unknown
IPECJ2_ENSSSCG00000009479	17	true		IPEC_J2	RNA binding motif protein 26 [Source:HGNC Symbol;Acc:HGNC:20327]
IPECJ2_ENSSSCG00000000921	16	true	Cluster 5	IPEC_J2	Unknown
IPECJ2_XLOC_010959	16	true	Cluster 5	IPEC_J2	Unknown
IPECJ2_ENSSSCG00000022867	16	true		IPEC_J2	Unknown
IPECJ2_ENSSSCG00000003772	16	true		IPEC_J2	zinc finger ZZ-type containing 3 [Source:HGNC Symbol;Acc:HGNC:24523]
IPECJ2_ENSSSCG00000014283	16	true		IPEC_J2	kinesin family member 3A [Source:HGNC Symbol;Acc:HGNC:6319]
IPECJ2_ENSSSCG00000016835	16	true		IPEC_J2	S-phase kinase-associated protein 2, E3 ubiquitin protein ligase [Source:HGNC Symbol;Acc:HGNC:10901]
IPECJ2_ENSSSCG00000016395	15	true		IPEC_J2	replication timing regulatory factor 1 [Source:HGNC Symbol;Acc:HGNC:23207]
IPECJ2_ENSSSCG00000005987	15	true		IPEC_J2	Unknown
IPECJ2_ENSSSCG00000024180	13	true		IPEC_J2	peripherial benzodiazepine receptor associated protein [Source:RefSeq peptide;Acc:NP_001009581]
IPECJ2_ENSSSCG00000024666	13	true		IPEC_J2	FXYD domain containing ion transport regulator 3 [Source:HGNC Symbol;Acc:HGNC:4027]
IPECJ2_ENSSSCG00000008600	12	true	Cluster 7	IPEC_J2	pumilio RNA binding family member 2 [Source:HGNC Symbol;Acc:HGNC:14958]
IPECJ2_ENSSSCG00000011213	12	true		IPEC_J2	topoisomerase (DNA) II beta 180kDa [Source:RefSeq peptide;Acc:NP_001245315]
IPECJ2_ENSSSCG00000016098	12	true		IPEC_J2	Unknown
IPECJ2_XLOC_023587	11	true	Cluster 4	IPEC_J2	IL-23 (Fragment) OS=Sus scrofa PE=2 SV=1
IPECJ2_ENSSSCG00000002646	11	true		IPEC_J2	trafficking protein particle complex 2 like [Source:HGNC Symbol;Acc:HGNC:30887]
IPECJ2_ENSSSCG00000008583	10	true		IPEC_J2	intersectin 2 [Source:HGNC Symbol;Acc:HGNC:6184]
IPECJ2_ENSSSCG00000007119	10	true		IPEC_J2	nuclear transport factor 2 like export factor 1 [Source:HGNC Symbol;Acc:HGNC:15913]
IPECJ2_ENSSSCG00000024984	9	true	Cluster 4	IPEC_J2	Unknown
IPECJ2_ENSSSCG00000025293	9	true	Cluster 4	IPEC_J2	helicase like transcription factor [Source:HGNC Symbol;Acc:HGNC:11099]
IPECJ2_ENSSSCG00000015386	9	true	Cluster 4	IPEC_J2	family with sequence similarity 126 member A [Source:HGNC Symbol;Acc:HGNC:24587]
IPECJ2_ENSSSCG00000003727	9	true	Cluster 7	IPEC_J2	Isoform 2 of Trafficking protein particle complex subunit 8 OS=Homo sapiens GN=TRAPPC8
AscL3_XLOC_012561	9	true		AscL3	Unknown
IPECJ2_ENSSSCG00000027573	9	true		IPEC_J2	ribosomal protein L29 [Source:HGNC Symbol;Acc:HGNC:10331]
IPECJ2_ENSSSCG00000003464	9	true		IPEC_J2	DnaJ heat shock protein family (Hsp40) member C16 [Source:HGNC Symbol;Acc:HGNC:29157]
IPECJ2_ENSSSCG00000000769	8	true	Cluster 4	IPEC_J2	BH3 interacting domain death agonist [Source:HGNC Symbol;Acc:HGNC:1050]
IPECJ2_ENSSSCG00000003670	8	true	Cluster 4	IPEC_J2	rearranged L-myc fusion [Source:HGNC Symbol;Acc:HGNC:10025]
IPECJ2_ENSSSCG00000021542	8	true	Cluster 4	IPEC_J2	Unknown
IPECJ2_ENSSSCG00000010239	8	true		IPEC_J2	RUN and FYVE domain containing 2 [Source:HGNC Symbol;Acc:HGNC:19761]
IPECJ2_ENSSSCG00000025258	8	true		IPEC_J2	Unknown
IPECJ2_ENSSSCG00000011825	8	true		IPEC_J2	ATPase 13A3 [Source:HGNC Symbol;Acc:HGNC:24113]
IPECJ2_ENSSSCG00000014044	8	true		IPEC_J2	nuclear receptor binding SET domain protein 1 [Source:HGNC Symbol;Acc:HGNC:14234]
IPECJ2_ENSSSCG00000014114	8	true		IPEC_J2	poly(A) RNA polymerase D4, non-canonical [Source:HGNC Symbol;Acc:HGNC:26776]
IPECJ2_XLOC_009159	8	true		IPEC_J2	Unknown
IPECJ2_XLOC_010223	8	true		IPEC_J2	Uncharacterized protein OS=Sus scrofa GN=AGFG1 PE=1 SV=1
IPECJ2_ENSSSCG00000008762	7	true	Cluster 4	IPEC_J2	stromal interaction molecule 2 [Source:HGNC Symbol;Acc:HGNC:19205]
IPECJ2_ENSSSCG00000015972	7	true	Cluster 7	IPEC_J2	Unknown
IPECJ2_ENSSSCG00000028100	7	true		IPEC_J2	Unknown
IPECJ2_ENSSSCG00000003716	7	true		IPEC_J2	SS18, nBAF chromatin remodeling complex subunit [Source:HGNC Symbol;Acc:HGNC:11340]
IPECJ2_XLOC_000015	7	true		IPEC_J2	Mitochondrial pyruvate carrier 1 OS=Bos taurus GN=MPC1 PE=1 SV=1
IPECJ2_ENSSSCG00000009217	6	true		IPEC_J2	polycystin 2, transient receptor potential cation channel [Source:HGNC Symbol;Acc:HGNC:9009]
AscL3_gene_GS_06168	6	true	Cluster 10	AscL3	Gut esterase 1 OS=Ascaris suum GN=ASU_12569 PE=4 SV=1
IPECJ2_ENSSSCG00000011857	6	true	Cluster 10	IPEC_J2	leishmanolysin like peptidase [Source:HGNC Symbol;Acc:HGNC:15991]
IPECJ2_ENSSSCG00000015201	6	true	Cluster 4	IPEC_J2	Uncharacterized protein OS=Sus scrofa GN=MSANTD2 PE=4 SV=1
IPECJ2_ENSSSCG00000005097	6	true	Cluster 6	IPEC_J2	small nuclear RNA activating complex polypeptide 1 [Source:HGNC Symbol;Acc:HGNC:11134]
IPECJ2_ENSSSCG00000023960	6	true	Cluster 7	IPEC_J2	Unknown
IPECJ2_ENSSSCG00000023334	6	true		IPEC_J2	Uncharacterized protein OS=Sus scrofa GN=CXorf23 PE=4 SV=1
AscL3_gene_GS_19483	6	true		AscL3	WD repeat-containing protein tag-125 OS=Caenorhabditis briggsae GN=tag-125 PE=4 SV=1
AscL3_gene_Liv_01915	6	true		AscL3	Uncharacterized protein OS=Ascaris lumbricoides PE=4 SV=1
AscL3_XLOC_021500	6	true		AscL3	Unknown
IPECJ2_ENSSSCG00000013453	6	true		IPEC_J2	Uncharacterized protein OS=Sus scrofa GN=PLEKHJ1 PE=4 SV=1
IPECJ2_ENSSSCG00000017673	5	true	Cluster 10	IPEC_J2	integrator complex subunit 2 [Source:HGNC Symbol;Acc:HGNC:29241]
IPECJ2_ENSSSCG00000015497	5	true	Cluster 13	IPEC_J2	kelch like family member 20 [Source:HGNC Symbol;Acc:HGNC:25056]
IPECJ2_ENSSSCG00000008412	5	true	Cluster 3	IPEC_J2	proteasome activator subunit 4 [Source:HGNC Symbol;Acc:HGNC:20635]
AscL3_gene_GS_05602	5	true	Cluster 3	AscL3	CUGBP Elav family member 4 OS=Ascaris suum GN=ASU_10313 PE=2 SV=1
IPECJ2_ENSSSCG00000025284	5	true	Cluster 3	IPEC_J2	coenzyme Q9 [Source:HGNC Symbol;Acc:HGNC:25302]
IPECJ2_ENSSSCG00000031053	5	true	Cluster 8	IPEC_J2	Unknown
IPECJ2_ENSSSCG00000005173	5	true	Cluster 8	IPEC_J2	HAUS augmin like complex subunit 6 [Source:HGNC Symbol;Acc:HGNC:25948]
AscL3_gene_GS_02546	5	true		AscL3	Venom allergen 5 OS=Ascaris suum GN=ASU_02857 PE=3 SV=1
AscL3_gene_GS_04352	5	true		AscL3	Nematode cuticle collagen domain-containing protein OS=Ascaris suum GN=ASU_04661 PE=4 SV=1
AscL3_gene_GS_06937	5	true		AscL3	Bm6553 OS=Brugia malayi GN=Bm6553 PE=4 SV=1
AscL3_gene_GS_21074	5	true		AscL3	Forkhead box protein P1 OS=Ascaris suum PE=2 SV=1
AscL3_gene_Liv_03967	5	true		AscL3	Venom allergen 5 OS=Ascaris suum GN=ASU_02857 PE=3 SV=1
AscL3_XLOC_017084	5	true		AscL3	Unknown
IPECJ2_ENSSSCG00000025869	5	true		IPEC_J2	Unknown
IPECJ2_ENSSSCG00000012624	5	true		IPEC_J2	solute carrier family 25 member 43 [Source:HGNC Symbol;Acc:HGNC:30557]
IPECJ2_ENSSSCG00000015073	5	true		IPEC_J2	transgelin [Source:HGNC Symbol;Acc:HGNC:11553]
IPECJ2_ENSSSCG00000004941	5	true		IPEC_J2	DIS3 like exosome 3'-5' exoribonuclease [Source:HGNC Symbol;Acc:HGNC:28698]
IPECJ2_ENSSSCG00000022801	4	true	Cluster 13	IPEC_J2	S100P binding protein [Source:HGNC Symbol;Acc:HGNC:25768]
IPECJ2_ENSSSCG00000012556	4	true	Cluster 14	IPEC_J2	RNA binding motif protein 41 [Source:HGNC Symbol;Acc:HGNC:25617]
IPECJ2_ENSSSCG00000002502	4	true	Cluster 3	IPEC_J2	autophagy related 2B [Source:HGNC Symbol;Acc:HGNC:20187]
IPECJ2_ENSSSCG00000006090	4	true	Cluster 6	IPEC_J2	mitochondrial transcription termination factor 3 [Source:HGNC Symbol;Acc:HGNC:24258]
AscL3_gene_GS_04442	4	true	Cluster 8	AscL3	Hyaluronidase OS=Ascaris suum GN=ASU_05650 PE=3 SV=1
IPECJ2_ENSSSCG00000009077	4	true	Cluster 8	IPEC_J2	heat shock protein family A (Hsp70) member 4 like [Source:HGNC Symbol;Acc:HGNC:17041]
IPECJ2_ENSSSCG00000007672	4	true		IPEC_J2	POP7 homolog, ribonuclease P/MRP subunit [Source:HGNC Symbol;Acc:HGNC:19949]
IPECJ2_ENSSSCG00000023041	4	true		IPEC_J2	poly(rC) binding protein 3 [Source:HGNC Symbol;Acc:HGNC:8651]
IPECJ2_ENSSSCG00000025820	4	true		IPEC_J2	solute carrier family 15 member 4 [Source:HGNC Symbol;Acc:HGNC:23090]
IPECJ2_ENSSSCG00000000508	4	true		IPEC_J2	Unknown
IPECJ2_ENSSSCG00000027527	4	true		IPEC_J2	Unknown
IPECJ2_ENSSSCG00000011953	4	true		IPEC_J2	zinc finger and BTB domain containing 11 [Source:HGNC Symbol;Acc:HGNC:16740]
IPECJ2_ENSSSCG00000028378	4	true		IPEC_J2	Unknown
IPECJ2_ENSSSCG00000014204	4	true		IPEC_J2	decapping mRNA 2 [Source:HGNC Symbol;Acc:HGNC:24452]
IPECJ2_ENSSSCG00000004639	4	true		IPEC_J2	ubiquitin specific peptidase 8 [Source:HGNC Symbol;Acc:HGNC:12631]
AscL3_gene_GS_23463	3	true	Cluster 11	AscL3	Uncharacterized protein OS=Ascaris suum GN=ASU_11150 PE=4 SV=1
IPECJ2_XLOC_029191	3	true	Cluster 13	IPEC_J2	Unknown
IPECJ2_ENSSSCG00000000167	3	true	Cluster 13	IPEC_J2	RIC8 guanine nucleotide exchange factor B [Source:HGNC Symbol;Acc:HGNC:25555]
AscL3_gene_GS_20549	3	true	Cluster 14	AscL3	Uncharacterized protein OS=Ascaris lumbricoides PE=4 SV=1
IPECJ2_ENSSSCG00000011862	3	true	Cluster 15	IPEC_J2	mucin-13 [Source:RefSeq peptide;Acc:NP_001098763]
IPECJ2_ENSSSCG00000006894	3	true	Cluster 3	IPEC_J2	formin binding protein 1 like [Source:HGNC Symbol;Acc:HGNC:20851]
IPECJ2_ENSSSCG00000022417	3	true	Cluster 6	IPEC_J2	hepatocyte nuclear factor 1-beta [Source:RefSeq peptide;Acc:NP_999121]
AscL3_gene_GS_13356	3	true	Cluster 6	AscL3	STE20/SPS1-related proline-alanine-rich protein kinase OS=Ascaris suum GN=ASU_07761 PE=2 SV=1
IPECJ2_ENSSSCG00000022273	3	true		IPEC_J2	Unknown
AscL3_gene_GS_01555	3	true		AscL3	Putative atp-dependent rna helicase dhx35-like protein OS=Ascaris suum GN=ASU_11930 PE=4 SV=1
AscL3_gene_GS_17429	3	true		AscL3	Uncharacterized protein OS=Ascaris suum GN=ASU_07317 PE=4 SV=1
AscL3_gene_GS_18153	3	true		AscL3	Histone RNA hairpin-binding protein OS=Ascaris suum PE=2 SV=1
AscL3_XLOC_004258	3	true		AscL3	Unknown
IPECJ2_ENSSSCG00000026731	3	true		IPEC_J2	centrosomal protein 85 [Source:HGNC Symbol;Acc:HGNC:25309]
IPECJ2_ENSSSCG00000013402	3	true		IPEC_J2	Unknown
IPECJ2_ENSSSCG00000003015	3	true		IPEC_J2	Unknown
IPECJ2_ENSSSCG00000014623	3	true		IPEC_J2	translocase of inner mitochondrial membrane 10 homolog B (yeast) [Source:HGNC Symbol;Acc:HGNC:4022]
IPECJ2_ENSSSCG00000005944	3	true		IPEC_J2	N-myc downstream regulated 1 [Source:HGNC Symbol;Acc:HGNC:7679]
IPECJ2_ENSSSCG00000020675	3	true		IPEC_J2	activating transcription factor 7 interacting protein 2 [Source:HGNC Symbol;Acc:HGNC:20397]
IPECJ2_ENSSSCG00000007100	3	true		IPEC_J2	solute carrier family 24 member 3 [Source:HGNC Symbol;Acc:HGNC:10977]
IPECJ2_ENSSSCG00000024201	2	true	Cluster 11	IPEC_J2	family with sequence similarity 208 member A [Source:HGNC Symbol;Acc:HGNC:30314]
IPECJ2_ENSSSCG00000006530	2	true	Cluster 11	IPEC_J2	ephrin-A1 [Source:HGNC Symbol;Acc:HGNC:3221]
AscL3_gene_GS_04314	2	true	Cluster 12	AscL3	Uncharacterized protein OS=Toxocara canis GN=Tcan_08058 PE=4 SV=1
IPECJ2_ENSSSCG00000010968	2	true	Cluster 12	IPEC_J2	interleukin 11 receptor subunit alpha [Source:HGNC Symbol;Acc:HGNC:5967]
IPECJ2_ENSSSCG00000003807	2	true	Cluster 12	IPEC_J2	DnaJ heat shock protein family (Hsp40) member C6 [Source:HGNC Symbol;Acc:HGNC:15469]
AscL3_gene_GS_03432	2	true	Cluster 13	AscL3	Uncharacterized protein OS=Ascaris suum GN=ASU_00026 PE=4 SV=1
AscL3_XLOC_024104	2	true	Cluster 14	AscL3	Organic solute transporter alpha-like protein OS=Ascaris suum PE=2 SV=1
IPECJ2_ENSSSCG00000023467	2	true	Cluster 15	IPEC_J2	Unknown
AscL3_gene_L3E_02947	2	true	Cluster 15	AscL3	Unknown
AscL3_gene_GS_02917	2	true		AscL3	Uncharacterized protein OS=Ascaris suum GN=ASU_02373 PE=4 SV=1
IPECJ2_ENSSSCG00000022712	2	true		IPEC_J2	Unknown
AscL3_gene_GS_09313	2	true		AscL3	Zeta-crystallin OS=Ascaris suum GN=ASU_09109 PE=4 SV=1
AscL3_gene_GS_13390	2	true		AscL3	WD repeat domain phosphoinositide-interacting protein 2 OS=Ascaris suum GN=ASU_00103 PE=2 SV=1
AscL3_gene_GS_15118	2	true		AscL3	Sodium hydrogen exchanger 9b2 OS=Ascaris suum GN=ASU_04428 PE=4 SV=1
AscL3_gene_GS_18003	2	true		AscL3	Succinyl-CoA:3-ketoacid-coenzyme A transferase OS=Ascaris suum GN=ASU_13672 PE=3 SV=1
AscL3_gene_GS_22808	2	true		AscL3	227 kDa spindle- and centromere-associated protein OS=Parascaris univalens GN=PUMA1 PE=2 SV=1
AscL3_gene_GS_24029	2	true		AscL3	1,2-dihydroxy-3-keto-5-methylthiopentene dioxygenase homolog OS=Ascaris suum GN=ASU_02170 PE=3 SV=1
AscL3_XLOC_002460	2	true		AscL3	Unknown
IPECJ2_ENSSSCG00000010446	2	true		IPEC_J2	AMSH-like protease [Source:RefSeq peptide;Acc:NP_001230272]
AscL3_XLOC_016818	2	true		AscL3	Unknown
IPECJ2_ENSSSCG00000010644	2	true		IPEC_J2	Unknown
IPECJ2_ENSSSCG00000011010	2	true		IPEC_J2	chromosome 9 open reading frame 72 [Source:HGNC Symbol;Acc:HGNC:28337]
IPECJ2_ENSSSCG00000000754	2	true		IPEC_J2	RAD52 homolog, DNA repair protein [Source:HGNC Symbol;Acc:HGNC:9824]
IPECJ2_ENSSSCG00000027248	2	true		IPEC_J2	Unknown
IPECJ2_ENSSSCG00000027410	2	true		IPEC_J2	CBFA2/RUNX1 translocation partner 2 [Source:HGNC Symbol;Acc:HGNC:1536]
IPECJ2_ENSSSCG00000011874	2	true		IPEC_J2	poly(ADP-ribose) polymerase family member 14 [Source:HGNC Symbol;Acc:HGNC:29232]
IPECJ2_ENSSSCG00000002387	2	true		IPEC_J2	G-patch domain containing 2 like [Source:HGNC Symbol;Acc:HGNC:20210]
IPECJ2_ENSSSCG00000030018	2	true		IPEC_J2	zinc finger protein 396 [Source:HGNC Symbol;Acc:HGNC:18824]
IPECJ2_XLOC_010852	2	true		IPEC_J2	Unknown
IPECJ2_ENSSSCG00000020701	2	true		IPEC_J2	tetratricopeptide repeat domain 9 [Source:HGNC Symbol;Acc:HGNC:20267]
AscL3_gene_GS_00138	1	true		AscL3	Myoglobin OS=Ascaris suum GN=ASU_01478 PE=3 SV=1
IPECJ2_ENSSSCG00000022070	1	true		IPEC_J2	zinc finger protein 143 [Source:HGNC Symbol;Acc:HGNC:12928]
IPECJ2_ENSSSCG00000008105	1	true		IPEC_J2	Unknown
IPECJ2_ENSSSCG00000022398	1	true		IPEC_J2	nuclear casein kinase and cyclin dependent kinase substrate 1 [Source:HGNC Symbol;Acc:HGNC:29923]
AscL3_gene_GS_04478	1	true		AscL3	Uncharacterized protein OS=Ascaris suum GN=ASU_01837 PE=4 SV=1
AscL3_gene_GS_05131	1	true		AscL3	Adp-ribosylation crystallin j1 OS=Ascaris suum GN=ASU_03574 PE=4 SV=1
AscL3_gene_GS_04525	1	true		AscL3	Glutaredoxin-1 OS=Ascaris suum GN=ASU_08951 PE=4 SV=1
IPECJ2_ENSSSCG00000008478	1	true		IPEC_J2	Unknown
AscL3_gene_GS_06576	1	true		AscL3	Bifunctional glyoxylate cycle protein OS=Ascaris suum GN=ASU_02627 PE=4 SV=1
AscL3_gene_GS_06005	1	true		AscL3	Bm4075 OS=Brugia malayi GN=Bm4075 PE=4 SV=1
AscL3_gene_GS_08285	1	true		AscL3	Multidrug resistance protein pgp-1 OS=Ascaris suum GN=ASU_04530 PE=4 SV=1
AscL3_gene_GS_09495	1	true		AscL3	Unknown
AscL3_gene_GS_10767	1	true		AscL3	Putative transporter C38C10.2 OS=Toxocara canis GN=C38C10.2 PE=4 SV=1
AscL3_gene_GS_11634	1	true		AscL3	Patched domain-containing protein 3 OS=Ascaris suum GN=ASU_10181 PE=4 SV=1
AscL3_gene_GS_15926	1	true		AscL3	Cral-trio domain-containing protein OS=Ascaris suum GN=ASU_06993 PE=4 SV=1
AscL3_gene_GS_17130	1	true		AscL3	Tyrosinase-like protein tyr-3 OS=Ascaris suum GN=ASU_08505 PE=4 SV=1
AscL3_gene_GS_17972	1	true		AscL3	Neuronal symmetry family member (Nsy-4) OS=Ascaris suum GN=ASU_02089 PE=4 SV=1
IPECJ2_ENSSSCG00000009401	1	true		IPEC_J2	RB transcriptional corepressor 1 [Source:HGNC Symbol;Acc:HGNC:9884]
AscL3_gene_GS_17433	1	true		AscL3	Receptor-type tyrosine-protein phosphatase c OS=Ascaris suum GN=ASU_10873 PE=4 SV=1
AscL3_gene_GS_17516	1	true		AscL3	Solute carrier family facilitated glucose transporter member 3 OS=Ascaris suum GN=ASU_08638 PE=3 SV=1
IPECJ2_ENSSSCG00000009491	1	true		IPEC_J2	TDP-glucose 4,6-dehydratase [Source:HGNC Symbol;Acc:HGNC:20324]
IPECJ2_ENSSSCG00000024663	1	true		IPEC_J2	spindle and centriole associated protein 1 [Source:HGNC Symbol;Acc:HGNC:25083]
IPECJ2_ENSSSCG00000010042	1	true		IPEC_J2	zinc finger protein 280B [Source:HGNC Symbol;Acc:HGNC:23022]
IPECJ2_ENSSSCG00000010160	1	true		IPEC_J2	TAR (HIV-1) RNA binding protein 1 [Source:HGNC Symbol;Acc:HGNC:11568]
AscL3_XLOC_019624	1	true		AscL3	Probable tRNA-splicing endonuclease subunit sen54 OS=Schizosaccharomyces pombe (strain 972 / ATCC 24843) GN=sen54 PE=3 SV=1
IPECJ2_ENSSSCG00000000469	1	true		IPEC_J2	LEM domain containing 3 [Source:HGNC Symbol;Acc:HGNC:28887]
IPECJ2_ENSSSCG00000027223	1	true		IPEC_J2	THAP domain containing 1 [Source:HGNC Symbol;Acc:HGNC:20856]
IPECJ2_ENSSSCG00000027575	1	true		IPEC_J2	RELB proto-oncogene, NF-kB subunit [Source:HGNC Symbol;Acc:HGNC:9956]
IPECJ2_ENSSSCG00000027700	1	true		IPEC_J2	regulation of nuclear pre-mRNA domain containing 1A [Source:HGNC Symbol;Acc:HGNC:25560]
IPECJ2_ENSSSCG00000003462	1	true		IPEC_J2	DNA damage inducible 1 homolog 2 [Source:HGNC Symbol;Acc:HGNC:24578]
IPECJ2_ENSSSCG00000004364	1	true		IPEC_J2	E3 ubiquitin-protein ligase HACE1 [Source:RefSeq peptide;Acc:NP_001182269]
IPECJ2_ENSSSCG00000030731	1	true		IPEC_J2	Unknown
IPECJ2_ENSSSCG00000004625	1	true		IPEC_J2	LEO1 homolog, Paf1/RNA polymerase II complex component [Source:HGNC Symbol;Acc:HGNC:30401]
IPECJ2_XLOC_001547	1	true		IPEC_J2	Unknown
IPECJ2_ENSSSCG00000016196	1	true		IPEC_J2	villin 1 [Source:HGNC Symbol;Acc:HGNC:12690]
IPECJ2_ENSSSCG00000016147	1	true		IPEC_J2	phosphoinositide kinase, FYVE-type zinc finger containing [Source:HGNC Symbol;Acc:HGNC:23785]
IPECJ2_ENSSSCG00000005481	1	true		IPEC_J2	Unknown
IPECJ2_XLOC_010577	1	true		IPEC_J2	Splicing regulatory glutamine/lysine-rich protein 1 OS=Homo sapiens GN=SREK1 PE=1 SV=1
IPECJ2_XLOC_015009	1	true		IPEC_J2	Unknown
IPECJ2_ENSSSCG00000006947	1	true		IPEC_J2	synapse defective Rho GTPase homolog 2 [Source:HGNC Symbol;Acc:HGNC:25841]
IPECJ2_XLOC_023799	1	true		IPEC_J2	Mirror-image polydactyly gene 1 protein OS=Homo sapiens GN=MIPOL1 PE=1 SV=1

## Sheet: GEN Edges
Name	Connection	Cor.Abs	Cor.Dir	Cor.Padj	Cor.Rank	Cor.Rho	Sequence.Descripton.1	Sequence.Descripton.2
IPECJ2_ENSSSCG00000003716 (pp) IPECJ2_ENSSSCG00000007331	Intra	0.982418	1	4.10718e-10	27446.5	0.982418	SS18, nBAF chromatin remodeling complex subunit [Source:HGNC Symbol;Acc:HGNC:11340]	RB transcriptional corepressor like 1 [Source:HGNC Symbol;Acc:HGNC:9893]
IPECJ2_ENSSSCG00000003716 (pp) IPECJ2_ENSSSCG00000024180	Intra	0.973626	1	4.59028e-09	24252.5	0.973626	SS18, nBAF chromatin remodeling complex subunit [Source:HGNC Symbol;Acc:HGNC:11340]	peripherial benzodiazepine receptor associated protein [Source:RefSeq peptide;Acc:NP_001009581]
IPECJ2_ENSSSCG00000003716 (pp) IPECJ2_XLOC_010223	Intra	0.96044	1	5.08105e-08	14245.5	0.96044	SS18, nBAF chromatin remodeling complex subunit [Source:HGNC Symbol;Acc:HGNC:11340]	Uncharacterized protein OS=Sus scrofa GN=AGFG1 PE=1 SV=1
IPECJ2_ENSSSCG00000003716 (pp) IPECJ2_XLOC_023587	Intra	0.96044	-1	5.08105e-08	14245.5	-0.96044	SS18, nBAF chromatin remodeling complex subunit [Source:HGNC Symbol;Acc:HGNC:11340]	IL-23 (Fragment) OS=Sus scrofa PE=2 SV=1
IPECJ2_ENSSSCG00000022801 (pp) IPECJ2_ENSSSCG00000011953	Intra	0.956044	1	1.04633e-05	9305.5	0.956044	S100P binding protein [Source:HGNC Symbol;Acc:HGNC:25768]	zinc finger and BTB domain containing 11 [Source:HGNC Symbol;Acc:HGNC:16740]
IPECJ2_ENSSSCG00000003716 (pp) IPECJ2_ENSSSCG00000005987	Intra	0.96044	1	7.40017e-06	14245.5	0.96044	SS18, nBAF chromatin remodeling complex subunit [Source:HGNC Symbol;Acc:HGNC:11340]	Unknown
IPECJ2_ENSSSCG00000022801 (pp) IPECJ2_ENSSSCG00000015497	Intra	0.951648	1	1.41528e-05	3309.5	0.951648	S100P binding protein [Source:HGNC Symbol;Acc:HGNC:25768]	kelch like family member 20 [Source:HGNC Symbol;Acc:HGNC:25056]
IPECJ2_ENSSSCG00000003716 (pp) IPECJ2_ENSSSCG00000014076	Intra	0.96044	1	7.40017e-06	14245.5	0.96044	SS18, nBAF chromatin remodeling complex subunit [Source:HGNC Symbol;Acc:HGNC:11340]	Isoform 2 of Soluble lamin-associated protein of 75 kDa OS=Homo sapiens GN=FAM169A
IPECJ2_ENSSSCG00000003727 (pp) IPECJ2_ENSSSCG00000008600	Intra	0.956044	1	1.04633e-05	9305.5	0.956044	Isoform 2 of Trafficking protein particle complex subunit 8 OS=Homo sapiens GN=TRAPPC8	pumilio RNA binding family member 2 [Source:HGNC Symbol;Acc:HGNC:14958]
AscL3_gene_GS_01555 (pp) IPECJ2_ENSSSCG00000023041	Inter	0.978022	1	1.55196e-09	26153.5	0.978022	Putative atp-dependent rna helicase dhx35-like protein OS=Ascaris suum GN=ASU_11930 PE=4 SV=1	poly(rC) binding protein 3 [Source:HGNC Symbol;Acc:HGNC:8651]
AscL3_gene_GS_01555 (pp) IPECJ2_ENSSSCG00000005944	Inter	0.969231	1	1.14652e-08	21732.5	0.969231	Putative atp-dependent rna helicase dhx35-like protein OS=Ascaris suum GN=ASU_11930 PE=4 SV=1	N-myc downstream regulated 1 [Source:HGNC Symbol;Acc:HGNC:7679]
AscL3_gene_GS_00138 (pp) IPECJ2_ENSSSCG00000008478	Inter	0.96044	1	5.08105e-08	14245.5	0.96044	Myoglobin OS=Ascaris suum GN=ASU_01478 PE=3 SV=1	Unknown
AscL3_gene_GS_02546 (pp) IPECJ2_ENSSSCG00000015073	Inter	0.969231	-1	1.14652e-08	21732.5	-0.969231	Venom allergen 5 OS=Ascaris suum GN=ASU_02857 PE=3 SV=1	transgelin [Source:HGNC Symbol;Acc:HGNC:11553]
AscL3_gene_GS_02546 (pp) IPECJ2_ENSSSCG00000000508	Inter	0.956044	1	9.46978e-08	9305.5	0.956044	Venom allergen 5 OS=Ascaris suum GN=ASU_02857 PE=3 SV=1	Unknown
AscL3_gene_GS_01555 (pp) IPECJ2_ENSSSCG00000000508	Inter	0.951648	-1	1.66161e-07	3309.5	-0.951648	Putative atp-dependent rna helicase dhx35-like protein OS=Ascaris suum GN=ASU_11930 PE=4 SV=1	Unknown
AscL3_gene_GS_02546 (pp) AscL3_gene_Liv_03967	Intra	0.995604	1	2.81634e-09	28836.5	0.995604	Venom allergen 5 OS=Ascaris suum GN=ASU_02857 PE=3 SV=1	Venom allergen 5 OS=Ascaris suum GN=ASU_02857 PE=3 SV=1
AscL3_gene_GS_03432 (pp) IPECJ2_ENSSSCG00000022801	Inter	0.956044	-1	9.46978e-08	9305.5	-0.956044	Uncharacterized protein OS=Ascaris suum GN=ASU_00026 PE=4 SV=1	S100P binding protein [Source:HGNC Symbol;Acc:HGNC:25768]
AscL3_gene_GS_02917 (pp) IPECJ2_ENSSSCG00000010644	Inter	0.969231	-1	1.14652e-08	21732.5	-0.969231	Uncharacterized protein OS=Ascaris suum GN=ASU_02373 PE=4 SV=1	Unknown
AscL3_gene_GS_03432 (pp) IPECJ2_ENSSSCG00000000167	Inter	0.964835	-1	2.53041e-08	18397.5	-0.964835	Uncharacterized protein OS=Ascaris suum GN=ASU_00026 PE=4 SV=1	RIC8 guanine nucleotide exchange factor B [Source:HGNC Symbol;Acc:HGNC:25555]
AscL3_gene_GS_04352 (pp) IPECJ2_ENSSSCG00000007119	Inter	0.969231	-1	1.14652e-08	21732.5	-0.969231	Nematode cuticle collagen domain-containing protein OS=Ascaris suum GN=ASU_04661 PE=4 SV=1	nuclear transport factor 2 like export factor 1 [Source:HGNC Symbol;Acc:HGNC:15913]
IPECJ2_ENSSSCG00000006777 (pp) IPECJ2_ENSSSCG00000022647	Intra	0.986813	1	7.37952e-11	28223.5	0.986813	ras homolog family member C [Source:HGNC Symbol;Acc:HGNC:669]	translocase of inner mitochondrial membrane 17 homolog B (yeast) [Source:HGNC Symbol;Acc:HGNC:17310]
AscL3_gene_GS_04352 (pp) AscL3_gene_Liv_01915	Intra	0.956044	1	9.46978e-08	9305.5	0.956044	Nematode cuticle collagen domain-containing protein OS=Ascaris suum GN=ASU_04661 PE=4 SV=1	Uncharacterized protein OS=Ascaris lumbricoides PE=4 SV=1
IPECJ2_ENSSSCG00000006777 (pp) IPECJ2_ENSSSCG00000007472	Intra	0.982418	1	5.27924e-07	27446.5	0.982418	ras homolog family member C [Source:HGNC Symbol;Acc:HGNC:669]	breast carcinoma amplified sequence 4 [Source:HGNC Symbol;Acc:HGNC:14367]
AscL3_gene_GS_04314 (pp) IPECJ2_ENSSSCG00000010968	Inter	0.964835	-1	2.53041e-08	18397.5	-0.964835	Uncharacterized protein OS=Toxocara canis GN=Tcan_08058 PE=4 SV=1	interleukin 11 receptor subunit alpha [Source:HGNC Symbol;Acc:HGNC:5967]
AscL3_gene_GS_04314 (pp) IPECJ2_ENSSSCG00000003807	Inter	0.951648	1	1.66161e-07	3309.5	0.951648	Uncharacterized protein OS=Toxocara canis GN=Tcan_08058 PE=4 SV=1	DnaJ heat shock protein family (Hsp40) member C6 [Source:HGNC Symbol;Acc:HGNC:15469]
IPECJ2_ENSSSCG00000006777 (pp) IPECJ2_ENSSSCG00000013267	Intra	0.986813	1	1.88722e-07	28223.5	0.986813	ras homolog family member C [Source:HGNC Symbol;Acc:HGNC:669]	peroxisomal biogenesis factor 16 [Source:HGNC Symbol;Acc:HGNC:8857]
IPECJ2_ENSSSCG00000022867 (pp) IPECJ2_ENSSSCG00000022647	Intra	0.96044	1	7.40017e-06	14245.5	0.96044	Unknown	translocase of inner mitochondrial membrane 17 homolog B (yeast) [Source:HGNC Symbol;Acc:HGNC:17310]
IPECJ2_ENSSSCG00000006777 (pp) IPECJ2_ENSSSCG00000025928	Intra	0.978022	1	1.07614e-06	26153.5	0.978022	ras homolog family member C [Source:HGNC Symbol;Acc:HGNC:669]	ribosomal protein L18 [Source:HGNC Symbol;Acc:HGNC:10310]
AscL3_gene_GS_04442 (pp) IPECJ2_ENSSSCG00000005173	Inter	0.96044	1	5.08105e-08	14245.5	0.96044	Hyaluronidase OS=Ascaris suum GN=ASU_05650 PE=3 SV=1	HAUS augmin like complex subunit 6 [Source:HGNC Symbol;Acc:HGNC:25948]
IPECJ2_ENSSSCG00000006777 (pp) IPECJ2_ENSSSCG00000027308	Intra	0.978022	1	1.55196e-09	26153.5	0.978022	ras homolog family member C [Source:HGNC Symbol;Acc:HGNC:669]	Unknown
AscL3_gene_GS_04352 (pp) IPECJ2_ENSSSCG00000003015	Inter	0.951648	-1	1.66161e-07	3309.5	-0.951648	Nematode cuticle collagen domain-containing protein OS=Ascaris suum GN=ASU_04661 PE=4 SV=1	Unknown
IPECJ2_ENSSSCG00000022867 (pp) IPECJ2_ENSSSCG00000023325	Intra	0.964835	1	5.02606e-06	18397.5	0.964835	Unknown	Aminoacylase-1 [Source:UniProtKB/Swiss-Prot;Acc:P37111]
IPECJ2_ENSSSCG00000006777 (pp) IPECJ2_ENSSSCG00000013619	Intra	0.982418	1	4.10718e-10	27446.5	0.982418	ras homolog family member C [Source:HGNC Symbol;Acc:HGNC:669]	SWIM-type zinc finger 7 associated protein 1 [Source:HGNC Symbol;Acc:HGNC:26638]
AscL3_gene_GS_04352 (pp) IPECJ2_ENSSSCG00000030018	Inter	0.951648	1	1.66161e-07	3309.5	0.951648	Nematode cuticle collagen domain-containing protein OS=Ascaris suum GN=ASU_04661 PE=4 SV=1	zinc finger protein 396 [Source:HGNC Symbol;Acc:HGNC:18824]
IPECJ2_ENSSSCG00000022867 (pp) IPECJ2_ENSSSCG00000014283	Intra	0.96044	-1	7.40017e-06	14245.5	-0.96044	Unknown	kinesin family member 3A [Source:HGNC Symbol;Acc:HGNC:6319]
IPECJ2_ENSSSCG00000006777 (pp) IPECJ2_ENSSSCG00000027840	Intra	0.982418	1	4.10718e-10	27446.5	0.982418	ras homolog family member C [Source:HGNC Symbol;Acc:HGNC:669]	Unknown
AscL3_gene_GS_04442 (pp) IPECJ2_ENSSSCG00000031053	Inter	0.956044	-1	9.46978e-08	9305.5	-0.956044	Hyaluronidase OS=Ascaris suum GN=ASU_05650 PE=3 SV=1	Unknown
IPECJ2_ENSSSCG00000022867 (pp) IPECJ2_ENSSSCG00000007472	Intra	0.951648	1	1.41528e-05	3309.5	0.951648	Unknown	breast carcinoma amplified sequence 4 [Source:HGNC Symbol;Acc:HGNC:14367]
IPECJ2_ENSSSCG00000006777 (pp) IPECJ2_ENSSSCG00000029830	Intra	0.973626	1	4.59028e-09	24252.5	0.973626	ras homolog family member C [Source:HGNC Symbol;Acc:HGNC:669]	ribosomal protein L8 [Source:HGNC Symbol;Acc:HGNC:10368]
AscL3_gene_GS_04478 (pp) IPECJ2_ENSSSCG00000027700	Inter	0.96044	-1	5.08105e-08	14245.5	-0.96044	Uncharacterized protein OS=Ascaris suum GN=ASU_01837 PE=4 SV=1	regulation of nuclear pre-mRNA domain containing 1A [Source:HGNC Symbol;Acc:HGNC:25560]
IPECJ2_ENSSSCG00000022867 (pp) IPECJ2_ENSSSCG00000025868	Intra	0.951648	1	1.41528e-05	3309.5	0.951648	Unknown	Unknown
IPECJ2_ENSSSCG00000006777 (pp) IPECJ2_ENSSSCG00000007189	Intra	0.969231	1	3.28443e-06	21732.5	0.969231	ras homolog family member C [Source:HGNC Symbol;Acc:HGNC:669]	syndecan binding protein 2 [Source:HGNC Symbol;Acc:HGNC:15756]
AscL3_gene_GS_04442 (pp) IPECJ2_XLOC_000015	Inter	0.96044	-1	5.08105e-08	14245.5	-0.96044	Hyaluronidase OS=Ascaris suum GN=ASU_05650 PE=3 SV=1	Mitochondrial pyruvate carrier 1 OS=Bos taurus GN=MPC1 PE=1 SV=1
IPECJ2_ENSSSCG00000022867 (pp) IPECJ2_ENSSSCG00000013267	Intra	0.956044	1	1.04633e-05	9305.5	0.956044	Unknown	peroxisomal biogenesis factor 16 [Source:HGNC Symbol;Acc:HGNC:8857]
IPECJ2_ENSSSCG00000006777 (pp) IPECJ2_ENSSSCG00000029034	Intra	0.978022	1	1.55196e-09	26153.5	0.978022	ras homolog family member C [Source:HGNC Symbol;Acc:HGNC:669]	cytochrome c oxidase subunit 4I1 [Source:HGNC Symbol;Acc:HGNC:2265]
AscL3_gene_GS_04442 (pp) IPECJ2_ENSSSCG00000009077	Inter	0.956044	1	9.46978e-08	9305.5	0.956044	Hyaluronidase OS=Ascaris suum GN=ASU_05650 PE=3 SV=1	heat shock protein family A (Hsp70) member 4 like [Source:HGNC Symbol;Acc:HGNC:17041]
IPECJ2_ENSSSCG00000022867 (pp) IPECJ2_ENSSSCG00000015786	Intra	0.956044	-1	1.04633e-05	9305.5	-0.956044	Unknown	Unknown
IPECJ2_ENSSSCG00000006777 (pp) IPECJ2_ENSSSCG00000026914	Intra	0.973626	1	4.59028e-09	24252.5	0.973626	ras homolog family member C [Source:HGNC Symbol;Acc:HGNC:669]	phospholipase A2 group XVI [Source:HGNC Symbol;Acc:HGNC:17825]
AscL3_gene_GS_05602 (pp) IPECJ2_ENSSSCG00000006894	Inter	0.978022	1	1.55196e-09	26153.5	0.978022	CUGBP Elav family member 4 OS=Ascaris suum GN=ASU_10313 PE=2 SV=1	formin binding protein 1 like [Source:HGNC Symbol;Acc:HGNC:20851]
IPECJ2_ENSSSCG00000006777 (pp) IPECJ2_ENSSSCG00000029362	Intra	0.969231	1	1.14652e-08	21732.5	0.969231	ras homolog family member C [Source:HGNC Symbol;Acc:HGNC:669]	charged multivesicular body protein 2A [Source:HGNC Symbol;Acc:HGNC:30216]
AscL3_gene_GS_05602 (pp) IPECJ2_ENSSSCG00000002502	Inter	0.96044	1	5.08105e-08	14245.5	0.96044	CUGBP Elav family member 4 OS=Ascaris suum GN=ASU_10313 PE=2 SV=1	autophagy related 2B [Source:HGNC Symbol;Acc:HGNC:20187]
IPECJ2_ENSSSCG00000006777 (pp) IPECJ2_ENSSSCG00000017114	Intra	0.96044	1	5.08105e-08	14245.5	0.96044	ras homolog family member C [Source:HGNC Symbol;Acc:HGNC:669]	NADH:ubiquinone oxidoreductase subunit S6 [Source:HGNC Symbol;Acc:HGNC:7713]
AscL3_gene_GS_04525 (pp) IPECJ2_ENSSSCG00000027527	Inter	0.956044	1	9.46978e-08	9305.5	0.956044	Glutaredoxin-1 OS=Ascaris suum GN=ASU_08951 PE=4 SV=1	Unknown
IPECJ2_ENSSSCG00000022867 (pp) IPECJ2_ENSSSCG00000029161	Intra	0.951648	1	1.66161e-07	3309.5	0.951648	Unknown	acireductone dioxygenase 1 [Source:HGNC Symbol;Acc:HGNC:30576]
IPECJ2_ENSSSCG00000006777 (pp) IPECJ2_ENSSSCG00000025868	Intra	0.969231	1	1.14652e-08	21732.5	0.969231	ras homolog family member C [Source:HGNC Symbol;Acc:HGNC:669]	Unknown
AscL3_gene_GS_05131 (pp) IPECJ2_ENSSSCG00000004364	Inter	0.951648	-1	1.66161e-07	3309.5	-0.951648	Adp-ribosylation crystallin j1 OS=Ascaris suum GN=ASU_03574 PE=4 SV=1	E3 ubiquitin-protein ligase HACE1 [Source:RefSeq peptide;Acc:NP_001182269]
IPECJ2_ENSSSCG00000006777 (pp) IPECJ2_ENSSSCG00000029161	Intra	0.969231	1	1.14652e-08	21732.5	0.969231	ras homolog family member C [Source:HGNC Symbol;Acc:HGNC:669]	acireductone dioxygenase 1 [Source:HGNC Symbol;Acc:HGNC:30576]
AscL3_gene_GS_05602 (pp) IPECJ2_ENSSSCG00000025284	Inter	0.951648	-1	1.66161e-07	3309.5	-0.951648	CUGBP Elav family member 4 OS=Ascaris suum GN=ASU_10313 PE=2 SV=1	coenzyme Q9 [Source:HGNC Symbol;Acc:HGNC:25302]
IPECJ2_ENSSSCG00000006777 (pp) IPECJ2_ENSSSCG00000012965	Intra	0.956044	1	1.04633e-05	9305.5	0.956044	ras homolog family member C [Source:HGNC Symbol;Acc:HGNC:669]	DR1 associated protein 1 [Source:HGNC Symbol;Acc:HGNC:3019]
AscL3_gene_GS_06005 (pp) IPECJ2_ENSSSCG00000016147	Inter	0.96044	-1	5.08105e-08	14245.5	-0.96044	Bm4075 OS=Brugia malayi GN=Bm4075 PE=4 SV=1	phosphoinositide kinase, FYVE-type zinc finger containing [Source:HGNC Symbol;Acc:HGNC:23785]
IPECJ2_ENSSSCG00000006777 (pp) IPECJ2_ENSSSCG00000020817	Intra	0.956044	1	1.04633e-05	9305.5	0.956044	ras homolog family member C [Source:HGNC Symbol;Acc:HGNC:669]	40S ribosomal protein S16 [Source:UniProtKB/Swiss-Prot;Acc:Q29201]
AscL3_gene_GS_05602 (pp) IPECJ2_ENSSSCG00000008412	Inter	0.951648	1	1.66161e-07	3309.5	0.951648	CUGBP Elav family member 4 OS=Ascaris suum GN=ASU_10313 PE=2 SV=1	proteasome activator subunit 4 [Source:HGNC Symbol;Acc:HGNC:20635]
IPECJ2_ENSSSCG00000006777 (pp) IPECJ2_ENSSSCG00000026812	Intra	0.96044	1	5.08105e-08	14245.5	0.96044	ras homolog family member C [Source:HGNC Symbol;Acc:HGNC:669]	Unknown
AscL3_gene_GS_05602 (pp) IPECJ2_ENSSSCG00000023334	Inter	0.951648	1	1.66161e-07	3309.5	0.951648	CUGBP Elav family member 4 OS=Ascaris suum GN=ASU_10313 PE=2 SV=1	Uncharacterized protein OS=Sus scrofa GN=CXorf23 PE=4 SV=1
AscL3_gene_GS_06168 (pp) IPECJ2_ENSSSCG00000017673	Inter	0.964835	-1	2.53041e-08	18397.5	-0.964835	Gut esterase 1 OS=Ascaris suum GN=ASU_12569 PE=4 SV=1	integrator complex subunit 2 [Source:HGNC Symbol;Acc:HGNC:29241]
IPECJ2_ENSSSCG00000006777 (pp) IPECJ2_ENSSSCG00000012784	Intra	0.951648	1	1.41528e-05	3309.5	0.951648	ras homolog family member C [Source:HGNC Symbol;Acc:HGNC:669]	signal sequence receptor subunit 4 [Source:HGNC Symbol;Acc:HGNC:11326]
AscL3_gene_GS_06168 (pp) IPECJ2_ENSSSCG00000011857	Inter	0.956044	-1	9.46978e-08	9305.5	-0.956044	Gut esterase 1 OS=Ascaris suum GN=ASU_12569 PE=4 SV=1	leishmanolysin like peptidase [Source:HGNC Symbol;Acc:HGNC:15991]
IPECJ2_ENSSSCG00000006777 (pp) IPECJ2_ENSSSCG00000014177	Intra	0.951648	-1	1.41528e-05	3309.5	-0.951648	ras homolog family member C [Source:HGNC Symbol;Acc:HGNC:669]	chromodomain helicase DNA binding protein 1 [Source:HGNC Symbol;Acc:HGNC:1915]
AscL3_gene_GS_06168 (pp) IPECJ2_ENSSSCG00000015972	Inter	0.969231	-1	1.14652e-08	21732.5	-0.969231	Gut esterase 1 OS=Ascaris suum GN=ASU_12569 PE=4 SV=1	Unknown
IPECJ2_ENSSSCG00000006777 (pp) IPECJ2_XLOC_007562	Intra	0.956044	1	9.46978e-08	9305.5	0.956044	ras homolog family member C [Source:HGNC Symbol;Acc:HGNC:669]	Unknown
AscL3_gene_GS_06168 (pp) IPECJ2_ENSSSCG00000023960	Inter	0.969231	-1	1.14652e-08	21732.5	-0.969231	Gut esterase 1 OS=Ascaris suum GN=ASU_12569 PE=4 SV=1	Unknown
AscL3_gene_GS_06576 (pp) IPECJ2_ENSSSCG00000004625	Inter	0.956044	-1	9.46978e-08	9305.5	-0.956044	Bifunctional glyoxylate cycle protein OS=Ascaris suum GN=ASU_02627 PE=4 SV=1	LEO1 homolog, Paf1/RNA polymerase II complex component [Source:HGNC Symbol;Acc:HGNC:30401]
AscL3_gene_GS_06937 (pp) AscL3_XLOC_012561	Intra	0.973626	-1	4.59028e-09	24252.5	-0.973626	Bm6553 OS=Brugia malayi GN=Bm6553 PE=4 SV=1	Unknown
AscL3_gene_GS_06168 (pp) IPECJ2_ENSSSCG00000012624	Inter	0.956044	-1	9.46978e-08	9305.5	-0.956044	Gut esterase 1 OS=Ascaris suum GN=ASU_12569 PE=4 SV=1	solute carrier family 25 member 43 [Source:HGNC Symbol;Acc:HGNC:30557]
AscL3_gene_GS_06168 (pp) IPECJ2_ENSSSCG00000003727	Inter	0.951648	-1	1.66161e-07	3309.5	-0.951648	Gut esterase 1 OS=Ascaris suum GN=ASU_12569 PE=4 SV=1	Isoform 2 of Trafficking protein particle complex subunit 8 OS=Homo sapiens GN=TRAPPC8
IPECJ2_XLOC_029191 (pp) AscL3_XLOC_012561	Inter	0.951648	-1	1.41528e-05	3309.5	-0.951648	Unknown	Unknown
AscL3_gene_GS_06937 (pp) IPECJ2_ENSSSCG00000005097	Inter	0.956044	1	9.46978e-08	9305.5	0.956044	Bm6553 OS=Brugia malayi GN=Bm6553 PE=4 SV=1	small nuclear RNA activating complex polypeptide 1 [Source:HGNC Symbol;Acc:HGNC:11134]
AscL3_gene_GS_08285 (pp) IPECJ2_ENSSSCG00000022273	Inter	0.956044	1	9.46978e-08	9305.5	0.956044	Multidrug resistance protein pgp-1 OS=Ascaris suum GN=ASU_04530 PE=4 SV=1	Unknown
AscL3_gene_GS_06937 (pp) IPECJ2_ENSSSCG00000010446	Inter	0.964835	1	2.53041e-08	18397.5	0.964835	Bm6553 OS=Brugia malayi GN=Bm6553 PE=4 SV=1	AMSH-like protease [Source:RefSeq peptide;Acc:NP_001230272]
AscL3_gene_GS_06937 (pp) IPECJ2_ENSSSCG00000014623	Inter	0.964835	-1	2.53041e-08	18397.5	-0.964835	Bm6553 OS=Brugia malayi GN=Bm6553 PE=4 SV=1	translocase of inner mitochondrial membrane 10 homolog B (yeast) [Source:HGNC Symbol;Acc:HGNC:4022]
AscL3_gene_GS_09313 (pp) IPECJ2_ENSSSCG00000022712	Inter	0.951648	1	1.66161e-07	3309.5	0.951648	Zeta-crystallin OS=Ascaris suum GN=ASU_09109 PE=4 SV=1	Unknown
AscL3_gene_GS_09495 (pp) IPECJ2_ENSSSCG00000030731	Inter	0.956044	1	9.46978e-08	9305.5	0.956044	Unknown	Unknown
AscL3_gene_GS_09313 (pp) IPECJ2_ENSSSCG00000020701	Inter	0.96044	1	5.08105e-08	14245.5	0.96044	Zeta-crystallin OS=Ascaris suum GN=ASU_09109 PE=4 SV=1	tetratricopeptide repeat domain 9 [Source:HGNC Symbol;Acc:HGNC:20267]
AscL3_gene_GS_09942 (pp) IPECJ2_ENSSSCG00000006777	Inter	0.973626	-1	4.59028e-09	24252.5	-0.973626	Sperm-specific protein OS=Ascaris suum GN=ASU_04668 PE=4 SV=1	ras homolog family member C [Source:HGNC Symbol;Acc:HGNC:669]
AscL3_gene_GS_09942 (pp) IPECJ2_ENSSSCG00000007281	Inter	0.969231	-1	1.14652e-08	21732.5	-0.969231	Sperm-specific protein OS=Ascaris suum GN=ASU_04668 PE=4 SV=1	microtubule associated protein 1 light chain 3 alpha [Source:HGNC Symbol;Acc:HGNC:6838]
AscL3_gene_GS_09942 (pp) IPECJ2_ENSSSCG00000024254	Inter	0.986813	-1	7.37952e-11	28223.5	-0.986813	Sperm-specific protein OS=Ascaris suum GN=ASU_04668 PE=4 SV=1	alkB homolog 7 [Source:HGNC Symbol;Acc:HGNC:21306]
AscL3_gene_GS_09942 (pp) IPECJ2_ENSSSCG00000023325	Inter	0.982418	-1	4.10718e-10	27446.5	-0.982418	Sperm-specific protein OS=Ascaris suum GN=ASU_04668 PE=4 SV=1	Aminoacylase-1 [Source:UniProtKB/Swiss-Prot;Acc:P37111]
AscL3_gene_GS_09942 (pp) IPECJ2_ENSSSCG00000027827	Inter	0.964835	-1	2.53041e-08	18397.5	-0.964835	Sperm-specific protein OS=Ascaris suum GN=ASU_04668 PE=4 SV=1	UDP-galactose-4-epimerase [Source:HGNC Symbol;Acc:HGNC:4116]
IPECJ2_ENSSSCG00000010631 (pp) IPECJ2_ENSSSCG00000021825	Intra	0.995604	-1	2.81634e-09	28836.5	-0.995604	glycerol-3-phosphate acyltransferase, mitochondrial [Source:HGNC Symbol;Acc:HGNC:24865]	40S ribosomal protein S21 [Source:UniProtKB/Swiss-Prot;Acc:P63221]
AscL3_gene_GS_09942 (pp) IPECJ2_ENSSSCG00000029855	Inter	0.964835	-1	2.53041e-08	18397.5	-0.964835	Sperm-specific protein OS=Ascaris suum GN=ASU_04668 PE=4 SV=1	lipoma HMGIC fusion partner [Source:HGNC Symbol;Acc:HGNC:6586]
IPECJ2_ENSSSCG00000003772 (pp) IPECJ2_ENSSSCG00000016835	Intra	0.986813	1	1.88722e-07	28223.5	0.986813	zinc finger ZZ-type containing 3 [Source:HGNC Symbol;Acc:HGNC:24523]	S-phase kinase-associated protein 2, E3 ubiquitin protein ligase [Source:HGNC Symbol;Acc:HGNC:10901]
AscL3_gene_GS_09942 (pp) IPECJ2_ENSSSCG00000001884	Inter	0.964835	-1	2.53041e-08	18397.5	-0.964835	Sperm-specific protein OS=Ascaris suum GN=ASU_04668 PE=4 SV=1	COMM domain containing 4 [Source:HGNC Symbol;Acc:HGNC:26027]
AscL3_gene_GS_09942 (pp) IPECJ2_ENSSSCG00000013267	Inter	0.964835	-1	2.53041e-08	18397.5	-0.964835	Sperm-specific protein OS=Ascaris suum GN=ASU_04668 PE=4 SV=1	peroxisomal biogenesis factor 16 [Source:HGNC Symbol;Acc:HGNC:8857]
AscL3_gene_GS_09942 (pp) IPECJ2_ENSSSCG00000007472	Inter	0.96044	-1	5.08105e-08	14245.5	-0.96044	Sperm-specific protein OS=Ascaris suum GN=ASU_04668 PE=4 SV=1	breast carcinoma amplified sequence 4 [Source:HGNC Symbol;Acc:HGNC:14367]
IPECJ2_ENSSSCG00000010631 (pp) IPECJ2_XLOC_011183	Intra	0.986813	-1	1.88722e-07	28223.5	-0.986813	glycerol-3-phosphate acyltransferase, mitochondrial [Source:HGNC Symbol;Acc:HGNC:24865]	Inosine triphosphate pyrophosphatase OS=Bos taurus GN=ITPA PE=2 SV=1
AscL3_gene_GS_09942 (pp) IPECJ2_ENSSSCG00000023110	Inter	0.96044	-1	5.08105e-08	14245.5	-0.96044	Sperm-specific protein OS=Ascaris suum GN=ASU_04668 PE=4 SV=1	UBX domain protein 1 [Source:HGNC Symbol;Acc:HGNC:18402]
AscL3_gene_GS_09942 (pp) IPECJ2_ENSSSCG00000003080	Inter	0.96044	-1	5.08105e-08	14245.5	-0.96044	Sperm-specific protein OS=Ascaris suum GN=ASU_04668 PE=4 SV=1	immunoglobulin superfamily member 23 [Source:HGNC Symbol;Acc:HGNC:40040]
IPECJ2_ENSSSCG00000003772 (pp) IPECJ2_ENSSSCG00000015786	Intra	0.978022	1	1.55196e-09	26153.5	0.978022	zinc finger ZZ-type containing 3 [Source:HGNC Symbol;Acc:HGNC:24523]	Unknown
AscL3_gene_GS_09942 (pp) IPECJ2_ENSSSCG00000007189	Inter	0.96044	-1	5.08105e-08	14245.5	-0.96044	Sperm-specific protein OS=Ascaris suum GN=ASU_04668 PE=4 SV=1	syndecan binding protein 2 [Source:HGNC Symbol;Acc:HGNC:15756]
IPECJ2_ENSSSCG00000010631 (pp) IPECJ2_ENSSSCG00000020790	Intra	0.986813	-1	1.88722e-07	28223.5	-0.986813	glycerol-3-phosphate acyltransferase, mitochondrial [Source:HGNC Symbol;Acc:HGNC:24865]	Uncharacterized protein OS=Sus scrofa GN=MYEOV2 PE=1 SV=1
AscL3_gene_GS_09942 (pp) IPECJ2_ENSSSCG00000029034	Inter	0.96044	-1	5.08105e-08	14245.5	-0.96044	Sperm-specific protein OS=Ascaris suum GN=ASU_04668 PE=4 SV=1	cytochrome c oxidase subunit 4I1 [Source:HGNC Symbol;Acc:HGNC:2265]
IPECJ2_ENSSSCG00000003772 (pp) IPECJ2_ENSSSCG00000029034	Intra	0.964835	-1	2.53041e-08	18397.5	-0.964835	zinc finger ZZ-type containing 3 [Source:HGNC Symbol;Acc:HGNC:24523]	cytochrome c oxidase subunit 4I1 [Source:HGNC Symbol;Acc:HGNC:2265]
AscL3_gene_GS_09942 (pp) IPECJ2_ENSSSCG00000016835	Inter	0.956044	1	9.46978e-08	9305.5	0.956044	Sperm-specific protein OS=Ascaris suum GN=ASU_04668 PE=4 SV=1	S-phase kinase-associated protein 2, E3 ubiquitin protein ligase [Source:HGNC Symbol;Acc:HGNC:10901]
IPECJ2_ENSSSCG00000010631 (pp) IPECJ2_ENSSSCG00000024974	Intra	0.978022	-1	1.07614e-06	26153.5	-0.978022	glycerol-3-phosphate acyltransferase, mitochondrial [Source:HGNC Symbol;Acc:HGNC:24865]	ribosomal protein L13 [Source:HGNC Symbol;Acc:HGNC:10303]
IPECJ2_ENSSSCG00000003772 (pp) IPECJ2_ENSSSCG00000012727	Intra	0.956044	1	9.46978e-08	9305.5	0.956044	zinc finger ZZ-type containing 3 [Source:HGNC Symbol;Acc:HGNC:24523]	fragile X mental retardation 1 [Source:HGNC Symbol;Acc:HGNC:3775]
IPECJ2_ENSSSCG00000023041 (pp) IPECJ2_ENSSSCG00000024666	Intra	0.964835	1	5.02606e-06	18397.5	0.964835	poly(rC) binding protein 3 [Source:HGNC Symbol;Acc:HGNC:8651]	FXYD domain containing ion transport regulator 3 [Source:HGNC Symbol;Acc:HGNC:4027]
AscL3_gene_GS_09942 (pp) IPECJ2_ENSSSCG00000025868	Inter	0.96044	-1	5.08105e-08	14245.5	-0.96044	Sperm-specific protein OS=Ascaris suum GN=ASU_04668 PE=4 SV=1	Unknown
IPECJ2_ENSSSCG00000003772 (pp) IPECJ2_ENSSSCG00000025928	Intra	0.964835	-1	2.53041e-08	18397.5	-0.964835	zinc finger ZZ-type containing 3 [Source:HGNC Symbol;Acc:HGNC:24523]	ribosomal protein L18 [Source:HGNC Symbol;Acc:HGNC:10310]
IPECJ2_ENSSSCG00000023041 (pp) IPECJ2_ENSSSCG00000014114	Intra	0.96044	-1	7.40017e-06	14245.5	-0.96044	poly(rC) binding protein 3 [Source:HGNC Symbol;Acc:HGNC:8651]	poly(A) RNA polymerase D4, non-canonical [Source:HGNC Symbol;Acc:HGNC:26776]
AscL3_gene_GS_09942 (pp) IPECJ2_ENSSSCG00000025928	Inter	0.96044	-1	5.08105e-08	14245.5	-0.96044	Sperm-specific protein OS=Ascaris suum GN=ASU_04668 PE=4 SV=1	ribosomal protein L18 [Source:HGNC Symbol;Acc:HGNC:10310]
IPECJ2_ENSSSCG00000010631 (pp) IPECJ2_ENSSSCG00000019018	Intra	0.982418	-1	5.27924e-07	27446.5	-0.982418	glycerol-3-phosphate acyltransferase, mitochondrial [Source:HGNC Symbol;Acc:HGNC:24865]	Unknown
AscL3_gene_GS_09942 (pp) IPECJ2_ENSSSCG00000009479	Inter	0.951648	1	1.66161e-07	3309.5	0.951648	Sperm-specific protein OS=Ascaris suum GN=ASU_04668 PE=4 SV=1	RNA binding motif protein 26 [Source:HGNC Symbol;Acc:HGNC:20327]
IPECJ2_ENSSSCG00000003772 (pp) IPECJ2_ENSSSCG00000023139	Intra	0.956044	-1	9.46978e-08	9305.5	-0.956044	zinc finger ZZ-type containing 3 [Source:HGNC Symbol;Acc:HGNC:24523]	Isoform 2 of Methyltransferase-like protein 23 OS=Homo sapiens GN=METTL23
AscL3_gene_GS_09942 (pp) IPECJ2_ENSSSCG00000015786	Inter	0.951648	1	1.66161e-07	3309.5	0.951648	Sperm-specific protein OS=Ascaris suum GN=ASU_04668 PE=4 SV=1	Unknown
IPECJ2_ENSSSCG00000010631 (pp) IPECJ2_ENSSSCG00000012784	Intra	0.973626	-1	1.97568e-06	24252.5	-0.973626	glycerol-3-phosphate acyltransferase, mitochondrial [Source:HGNC Symbol;Acc:HGNC:24865]	signal sequence receptor subunit 4 [Source:HGNC Symbol;Acc:HGNC:11326]
IPECJ2_ENSSSCG00000003772 (pp) IPECJ2_ENSSSCG00000001423	Intra	0.951648	-1	1.66161e-07	3309.5	-0.951648	zinc finger ZZ-type containing 3 [Source:HGNC Symbol;Acc:HGNC:24523]	negative elongation factor complex member E [Source:HGNC Symbol;Acc:HGNC:13974]
AscL3_gene_GS_09942 (pp) IPECJ2_ENSSSCG00000027308	Inter	0.956044	-1	9.46978e-08	9305.5	-0.956044	Sperm-specific protein OS=Ascaris suum GN=ASU_04668 PE=4 SV=1	Unknown
IPECJ2_ENSSSCG00000010631 (pp) IPECJ2_ENSSSCG00000027971	Intra	0.978022	-1	1.55196e-09	26153.5	-0.978022	glycerol-3-phosphate acyltransferase, mitochondrial [Source:HGNC Symbol;Acc:HGNC:24865]	regulatory factor X associated ankyrin containing protein [Source:HGNC Symbol;Acc:HGNC:9987]
IPECJ2_ENSSSCG00000003772 (pp) IPECJ2_ENSSSCG00000013267	Intra	0.956044	-1	9.46978e-08	9305.5	-0.956044	zinc finger ZZ-type containing 3 [Source:HGNC Symbol;Acc:HGNC:24523]	peroxisomal biogenesis factor 16 [Source:HGNC Symbol;Acc:HGNC:8857]
IPECJ2_ENSSSCG00000010631 (pp) IPECJ2_XLOC_029898	Intra	0.978022	-1	1.07614e-06	26153.5	-0.978022	glycerol-3-phosphate acyltransferase, mitochondrial [Source:HGNC Symbol;Acc:HGNC:24865]	Proteasome subunit beta type-7 OS=Sus scrofa GN=PSMB7 PE=2 SV=2
AscL3_gene_GS_09942 (pp) IPECJ2_ENSSSCG00000029830	Inter	0.956044	-1	9.46978e-08	9305.5	-0.956044	Sperm-specific protein OS=Ascaris suum GN=ASU_04668 PE=4 SV=1	ribosomal protein L8 [Source:HGNC Symbol;Acc:HGNC:10368]
IPECJ2_ENSSSCG00000023110 (pp) IPECJ2_ENSSSCG00000007472	Intra	0.978022	1	1.07614e-06	26153.5	0.978022	UBX domain protein 1 [Source:HGNC Symbol;Acc:HGNC:18402]	breast carcinoma amplified sequence 4 [Source:HGNC Symbol;Acc:HGNC:14367]
AscL3_gene_GS_10767 (pp) IPECJ2_ENSSSCG00000020675	Inter	0.951648	-1	1.66161e-07	3309.5	-0.951648	Putative transporter C38C10.2 OS=Toxocara canis GN=C38C10.2 PE=4 SV=1	activating transcription factor 7 interacting protein 2 [Source:HGNC Symbol;Acc:HGNC:20397]
IPECJ2_ENSSSCG00000023110 (pp) IPECJ2_ENSSSCG00000025928	Intra	0.978022	1	1.07614e-06	26153.5	0.978022	UBX domain protein 1 [Source:HGNC Symbol;Acc:HGNC:18402]	ribosomal protein L18 [Source:HGNC Symbol;Acc:HGNC:10310]
AscL3_gene_GS_11251 (pp) IPECJ2_ENSSSCG00000007331	Inter	0.973626	-1	4.59028e-09	24252.5	-0.973626	Uncharacterized protein OS=Ascaris suum GN=ASU_01462 PE=4 SV=1	RB transcriptional corepressor like 1 [Source:HGNC Symbol;Acc:HGNC:9893]
IPECJ2_ENSSSCG00000010631 (pp) IPECJ2_ENSSSCG00000012965	Intra	0.969231	-1	3.28443e-06	21732.5	-0.969231	glycerol-3-phosphate acyltransferase, mitochondrial [Source:HGNC Symbol;Acc:HGNC:24865]	DR1 associated protein 1 [Source:HGNC Symbol;Acc:HGNC:3019]
IPECJ2_ENSSSCG00000003772 (pp) IPECJ2_ENSSSCG00000014283	Intra	0.951648	1	1.41528e-05	3309.5	0.951648	zinc finger ZZ-type containing 3 [Source:HGNC Symbol;Acc:HGNC:24523]	kinesin family member 3A [Source:HGNC Symbol;Acc:HGNC:6319]
AscL3_gene_GS_09942 (pp) IPECJ2_ENSSSCG00000029362	Inter	0.951648	-1	1.66161e-07	3309.5	-0.951648	Sperm-specific protein OS=Ascaris suum GN=ASU_04668 PE=4 SV=1	charged multivesicular body protein 2A [Source:HGNC Symbol;Acc:HGNC:30216]
IPECJ2_ENSSSCG00000010631 (pp) IPECJ2_ENSSSCG00000027353	Intra	0.973626	-1	1.97568e-06	24252.5	-0.973626	glycerol-3-phosphate acyltransferase, mitochondrial [Source:HGNC Symbol;Acc:HGNC:24865]	Unknown
IPECJ2_ENSSSCG00000023110 (pp) IPECJ2_ENSSSCG00000029830	Intra	0.986813	1	1.88722e-07	28223.5	0.986813	UBX domain protein 1 [Source:HGNC Symbol;Acc:HGNC:18402]	ribosomal protein L8 [Source:HGNC Symbol;Acc:HGNC:10368]
AscL3_gene_GS_09942 (pp) IPECJ2_XLOC_005381	Inter	0.951648	-1	1.66161e-07	3309.5	-0.951648	Sperm-specific protein OS=Ascaris suum GN=ASU_04668 PE=4 SV=1	Unknown
IPECJ2_ENSSSCG00000003772 (pp) IPECJ2_ENSSSCG00000007472	Intra	0.951648	-1	1.66161e-07	3309.5	-0.951648	zinc finger ZZ-type containing 3 [Source:HGNC Symbol;Acc:HGNC:24523]	breast carcinoma amplified sequence 4 [Source:HGNC Symbol;Acc:HGNC:14367]
IPECJ2_ENSSSCG00000023110 (pp) IPECJ2_ENSSSCG00000013267	Intra	0.973626	1	1.97568e-06	24252.5	0.973626	UBX domain protein 1 [Source:HGNC Symbol;Acc:HGNC:18402]	peroxisomal biogenesis factor 16 [Source:HGNC Symbol;Acc:HGNC:8857]
AscL3_gene_GS_11251 (pp) IPECJ2_ENSSSCG00000024974	Inter	0.969231	1	1.14652e-08	21732.5	0.969231	Uncharacterized protein OS=Ascaris suum GN=ASU_01462 PE=4 SV=1	ribosomal protein L13 [Source:HGNC Symbol;Acc:HGNC:10303]
IPECJ2_ENSSSCG00000010631 (pp) IPECJ2_ENSSSCG00000017308	Intra	0.969231	1	3.28443e-06	21732.5	0.969231	glycerol-3-phosphate acyltransferase, mitochondrial [Source:HGNC Symbol;Acc:HGNC:24865]	cell division cycle 27 [Source:HGNC Symbol;Acc:HGNC:1728]
IPECJ2_ENSSSCG00000023110 (pp) IPECJ2_ENSSSCG00000027308	Intra	0.969231	1	1.14652e-08	21732.5	0.969231	UBX domain protein 1 [Source:HGNC Symbol;Acc:HGNC:18402]	Unknown
AscL3_gene_GS_11251 (pp) IPECJ2_ENSSSCG00000004970	Inter	0.964835	1	2.53041e-08	18397.5	0.964835	Uncharacterized protein OS=Ascaris suum GN=ASU_01462 PE=4 SV=1	Unknown
IPECJ2_ENSSSCG00000023110 (pp) IPECJ2_ENSSSCG00000029034	Intra	0.978022	1	1.07614e-06	26153.5	0.978022	UBX domain protein 1 [Source:HGNC Symbol;Acc:HGNC:18402]	cytochrome c oxidase subunit 4I1 [Source:HGNC Symbol;Acc:HGNC:2265]
AscL3_gene_GS_11251 (pp) IPECJ2_ENSSSCG00000020790	Inter	0.973626	1	4.59028e-09	24252.5	0.973626	Uncharacterized protein OS=Ascaris suum GN=ASU_01462 PE=4 SV=1	Uncharacterized protein OS=Sus scrofa GN=MYEOV2 PE=1 SV=1
AscL3_gene_GS_11251 (pp) IPECJ2_ENSSSCG00000021825	Inter	0.973626	1	4.59028e-09	24252.5	0.973626	Uncharacterized protein OS=Ascaris suum GN=ASU_01462 PE=4 SV=1	40S ribosomal protein S21 [Source:UniProtKB/Swiss-Prot;Acc:P63221]
IPECJ2_ENSSSCG00000023110 (pp) IPECJ2_ENSSSCG00000029362	Intra	0.978022	1	1.07614e-06	26153.5	0.978022	UBX domain protein 1 [Source:HGNC Symbol;Acc:HGNC:18402]	charged multivesicular body protein 2A [Source:HGNC Symbol;Acc:HGNC:30216]
IPECJ2_ENSSSCG00000010631 (pp) IPECJ2_ENSSSCG00000014076	Intra	0.969231	1	3.28443e-06	21732.5	0.969231	glycerol-3-phosphate acyltransferase, mitochondrial [Source:HGNC Symbol;Acc:HGNC:24865]	Isoform 2 of Soluble lamin-associated protein of 75 kDa OS=Homo sapiens GN=FAM169A
IPECJ2_ENSSSCG00000023110 (pp) IPECJ2_ENSSSCG00000006777	Intra	0.96044	1	7.40017e-06	14245.5	0.96044	UBX domain protein 1 [Source:HGNC Symbol;Acc:HGNC:18402]	ras homolog family member C [Source:HGNC Symbol;Acc:HGNC:669]
AscL3_gene_GS_11251 (pp) IPECJ2_ENSSSCG00000024180	Inter	0.964835	-1	2.53041e-08	18397.5	-0.964835	Uncharacterized protein OS=Ascaris suum GN=ASU_01462 PE=4 SV=1	peripherial benzodiazepine receptor associated protein [Source:RefSeq peptide;Acc:NP_001009581]
AscL3_gene_GS_11251 (pp) IPECJ2_ENSSSCG00000027353	Inter	0.964835	1	2.53041e-08	18397.5	0.964835	Uncharacterized protein OS=Ascaris suum GN=ASU_01462 PE=4 SV=1	Unknown
IPECJ2_ENSSSCG00000010631 (pp) IPECJ2_ENSSSCG00000020817	Intra	0.964835	-1	5.02606e-06	18397.5	-0.964835	glycerol-3-phosphate acyltransferase, mitochondrial [Source:HGNC Symbol;Acc:HGNC:24865]	40S ribosomal protein S16 [Source:UniProtKB/Swiss-Prot;Acc:Q29201]
IPECJ2_ENSSSCG00000023110 (pp) IPECJ2_ENSSSCG00000012842	Intra	0.964835	1	5.02606e-06	18397.5	0.964835	UBX domain protein 1 [Source:HGNC Symbol;Acc:HGNC:18402]	Unknown
AscL3_gene_GS_11251 (pp) IPECJ2_ENSSSCG00000010865	Inter	0.964835	-1	2.53041e-08	18397.5	-0.964835	Uncharacterized protein OS=Ascaris suum GN=ASU_01462 PE=4 SV=1	exonuclease 1 [Source:HGNC Symbol;Acc:HGNC:3511]
IPECJ2_ENSSSCG00000006894 (pp) IPECJ2_ENSSSCG00000025284	Intra	0.973626	-1	4.59028e-09	24252.5	-0.973626	formin binding protein 1 like [Source:HGNC Symbol;Acc:HGNC:20851]	coenzyme Q9 [Source:HGNC Symbol;Acc:HGNC:25302]
IPECJ2_ENSSSCG00000023110 (pp) IPECJ2_ENSSSCG00000001423	Intra	0.96044	1	5.08105e-08	14245.5	0.96044	UBX domain protein 1 [Source:HGNC Symbol;Acc:HGNC:18402]	negative elongation factor complex member E [Source:HGNC Symbol;Acc:HGNC:13974]
AscL3_gene_GS_11251 (pp) IPECJ2_ENSSSCG00000019018	Inter	0.964835	1	2.53041e-08	18397.5	0.964835	Uncharacterized protein OS=Ascaris suum GN=ASU_01462 PE=4 SV=1	Unknown
IPECJ2_ENSSSCG00000006894 (pp) IPECJ2_ENSSSCG00000002502	Intra	0.964835	1	5.02606e-06	18397.5	0.964835	formin binding protein 1 like [Source:HGNC Symbol;Acc:HGNC:20851]	autophagy related 2B [Source:HGNC Symbol;Acc:HGNC:20187]
IPECJ2_ENSSSCG00000023110 (pp) IPECJ2_ENSSSCG00000029161	Intra	0.956044	1	9.46978e-08	9305.5	0.956044	UBX domain protein 1 [Source:HGNC Symbol;Acc:HGNC:18402]	acireductone dioxygenase 1 [Source:HGNC Symbol;Acc:HGNC:30576]
AscL3_gene_GS_11251 (pp) IPECJ2_XLOC_011183	Inter	0.96044	1	5.08105e-08	14245.5	0.96044	Uncharacterized protein OS=Ascaris suum GN=ASU_01462 PE=4 SV=1	Inosine triphosphate pyrophosphatase OS=Bos taurus GN=ITPA PE=2 SV=1
IPECJ2_ENSSSCG00000023110 (pp) IPECJ2_ENSSSCG00000001884	Intra	0.951648	1	1.41528e-05	3309.5	0.951648	UBX domain protein 1 [Source:HGNC Symbol;Acc:HGNC:18402]	COMM domain containing 4 [Source:HGNC Symbol;Acc:HGNC:26027]
AscL3_gene_GS_11251 (pp) IPECJ2_ENSSSCG00000000921	Inter	0.956044	-1	9.46978e-08	9305.5	-0.956044	Uncharacterized protein OS=Ascaris suum GN=ASU_01462 PE=4 SV=1	Unknown
IPECJ2_ENSSSCG00000003807 (pp) IPECJ2_ENSSSCG00000010968	Intra	0.951648	-1	1.66161e-07	3309.5	-0.951648	DnaJ heat shock protein family (Hsp40) member C6 [Source:HGNC Symbol;Acc:HGNC:15469]	interleukin 11 receptor subunit alpha [Source:HGNC Symbol;Acc:HGNC:5967]
IPECJ2_ENSSSCG00000023110 (pp) IPECJ2_ENSSSCG00000007160	Intra	0.956044	1	1.04633e-05	9305.5	0.956044	UBX domain protein 1 [Source:HGNC Symbol;Acc:HGNC:18402]	DDRGK domain containing 1 [Source:HGNC Symbol;Acc:HGNC:16110]
AscL3_gene_GS_11251 (pp) IPECJ2_ENSSSCG00000027971	Inter	0.964835	1	2.53041e-08	18397.5	0.964835	Uncharacterized protein OS=Ascaris suum GN=ASU_01462 PE=4 SV=1	regulatory factor X associated ankyrin containing protein [Source:HGNC Symbol;Acc:HGNC:9987]
AscL3_gene_GS_11251 (pp) IPECJ2_ENSSSCG00000010631	Inter	0.96044	-1	5.08105e-08	14245.5	-0.96044	Uncharacterized protein OS=Ascaris suum GN=ASU_01462 PE=4 SV=1	glycerol-3-phosphate acyltransferase, mitochondrial [Source:HGNC Symbol;Acc:HGNC:24865]
AscL3_gene_GS_11251 (pp) IPECJ2_ENSSSCG00000001922	Inter	0.951648	-1	1.66161e-07	3309.5	-0.951648	Uncharacterized protein OS=Ascaris suum GN=ASU_01462 PE=4 SV=1	ariadne RBR E3 ubiquitin protein ligase 1 [Source:HGNC Symbol;Acc:HGNC:689]
IPECJ2_ENSSSCG00000010631 (pp) IPECJ2_ENSSSCG00000016098	Intra	0.96044	1	7.40017e-06	14245.5	0.96044	glycerol-3-phosphate acyltransferase, mitochondrial [Source:HGNC Symbol;Acc:HGNC:24865]	Unknown
AscL3_gene_GS_11251 (pp) IPECJ2_ENSSSCG00000003716	Inter	0.951648	-1	1.66161e-07	3309.5	-0.951648	Uncharacterized protein OS=Ascaris suum GN=ASU_01462 PE=4 SV=1	SS18, nBAF chromatin remodeling complex subunit [Source:HGNC Symbol;Acc:HGNC:11340]
IPECJ2_ENSSSCG00000023110 (pp) IPECJ2_ENSSSCG00000007189	Intra	0.951648	1	1.41528e-05	3309.5	0.951648	UBX domain protein 1 [Source:HGNC Symbol;Acc:HGNC:18402]	syndecan binding protein 2 [Source:HGNC Symbol;Acc:HGNC:15756]
AscL3_gene_GS_11251 (pp) IPECJ2_ENSSSCG00000011825	Inter	0.956044	-1	9.46978e-08	9305.5	-0.956044	Uncharacterized protein OS=Ascaris suum GN=ASU_01462 PE=4 SV=1	ATPase 13A3 [Source:HGNC Symbol;Acc:HGNC:24113]
IPECJ2_ENSSSCG00000023110 (pp) IPECJ2_ENSSSCG00000027840	Intra	0.951648	1	1.66161e-07	3309.5	0.951648	UBX domain protein 1 [Source:HGNC Symbol;Acc:HGNC:18402]	Unknown
AscL3_gene_GS_11251 (pp) IPECJ2_ENSSSCG00000014076	Inter	0.956044	-1	9.46978e-08	9305.5	-0.956044	Uncharacterized protein OS=Ascaris suum GN=ASU_01462 PE=4 SV=1	Isoform 2 of Soluble lamin-associated protein of 75 kDa OS=Homo sapiens GN=FAM169A
AscL3_gene_GS_11251 (pp) IPECJ2_ENSSSCG00000012784	Inter	0.951648	1	1.66161e-07	3309.5	0.951648	Uncharacterized protein OS=Ascaris suum GN=ASU_01462 PE=4 SV=1	signal sequence receptor subunit 4 [Source:HGNC Symbol;Acc:HGNC:11326]
AscL3_gene_GS_11251 (pp) IPECJ2_ENSSSCG00000016098	Inter	0.951648	-1	1.66161e-07	3309.5	-0.951648	Uncharacterized protein OS=Ascaris suum GN=ASU_01462 PE=4 SV=1	Unknown
AscL3_gene_GS_11251 (pp) IPECJ2_ENSSSCG00000005987	Inter	0.951648	-1	1.66161e-07	3309.5	-0.951648	Uncharacterized protein OS=Ascaris suum GN=ASU_01462 PE=4 SV=1	Unknown
AscL3_gene_GS_11251 (pp) IPECJ2_ENSSSCG00000010063	Inter	0.951648	1	1.66161e-07	3309.5	0.951648	Uncharacterized protein OS=Ascaris suum GN=ASU_01462 PE=4 SV=1	Macrophage migration inhibitory factor OS=Sus scrofa GN=MIF PE=1 SV=3
AscL3_gene_GS_11251 (pp) IPECJ2_XLOC_010223	Inter	0.951648	-1	1.66161e-07	3309.5	-0.951648	Uncharacterized protein OS=Ascaris suum GN=ASU_01462 PE=4 SV=1	Uncharacterized protein OS=Sus scrofa GN=AGFG1 PE=1 SV=1
IPECJ2_ENSSSCG00000010631 (pp) IPECJ2_ENSSSCG00000029362	Intra	0.951648	-1	1.41528e-05	3309.5	-0.951648	glycerol-3-phosphate acyltransferase, mitochondrial [Source:HGNC Symbol;Acc:HGNC:24865]	charged multivesicular body protein 2A [Source:HGNC Symbol;Acc:HGNC:30216]
AscL3_gene_GS_11251 (pp) IPECJ2_XLOC_010959	Inter	0.951648	-1	1.66161e-07	3309.5	-0.951648	Uncharacterized protein OS=Ascaris suum GN=ASU_01462 PE=4 SV=1	Unknown
AscL3_gene_GS_11251 (pp) IPECJ2_ENSSSCG00000017308	Inter	0.951648	-1	1.66161e-07	3309.5	-0.951648	Uncharacterized protein OS=Ascaris suum GN=ASU_01462 PE=4 SV=1	cell division cycle 27 [Source:HGNC Symbol;Acc:HGNC:1728]
AscL3_gene_GS_11251 (pp) IPECJ2_ENSSSCG00000017705	Inter	0.951648	1	1.66161e-07	3309.5	0.951648	Uncharacterized protein OS=Ascaris suum GN=ASU_01462 PE=4 SV=1	C-C motif chemokine ligand 5 [Source:HGNC Symbol;Acc:HGNC:10632]
AscL3_gene_GS_12056 (pp) IPECJ2_ENSSSCG00000026914	Inter	0.991209	1	6.5401e-12	28659.5	0.991209	Elongation of very long chain fatty acids protein OS=Ascaris suum GN=ASU_11627 PE=3 SV=1	phospholipase A2 group XVI [Source:HGNC Symbol;Acc:HGNC:17825]
IPECJ2_ENSSSCG00000010644 (pp) IPECJ2_ENSSSCG00000007672	Intra	0.986813	-1	7.37952e-11	28223.5	-0.986813	Unknown	POP7 homolog, ribonuclease P/MRP subunit [Source:HGNC Symbol;Acc:HGNC:19949]
AscL3_gene_GS_11251 (pp) IPECJ2_XLOC_029898	Inter	0.951648	1	1.66161e-07	3309.5	0.951648	Uncharacterized protein OS=Ascaris suum GN=ASU_01462 PE=4 SV=1	Proteasome subunit beta type-7 OS=Sus scrofa GN=PSMB7 PE=2 SV=2
AscL3_gene_GS_11634 (pp) IPECJ2_XLOC_023799	Inter	0.951648	-1	1.66161e-07	3309.5	-0.951648	Patched domain-containing protein 3 OS=Ascaris suum GN=ASU_10181 PE=4 SV=1	Mirror-image polydactyly gene 1 protein OS=Homo sapiens GN=MIPOL1 PE=1 SV=1
AscL3_gene_GS_12056 (pp) IPECJ2_ENSSSCG00000027971	Inter	0.978022	1	1.55196e-09	26153.5	0.978022	Elongation of very long chain fatty acids protein OS=Ascaris suum GN=ASU_11627 PE=3 SV=1	regulatory factor X associated ankyrin containing protein [Source:HGNC Symbol;Acc:HGNC:9987]
AscL3_gene_GS_12056 (pp) IPECJ2_ENSSSCG00000006777	Inter	0.973626	1	4.59028e-09	24252.5	0.973626	Elongation of very long chain fatty acids protein OS=Ascaris suum GN=ASU_11627 PE=3 SV=1	ras homolog family member C [Source:HGNC Symbol;Acc:HGNC:669]
AscL3_gene_GS_12056 (pp) IPECJ2_ENSSSCG00000013619	Inter	0.982418	1	4.10718e-10	27446.5	0.982418	Elongation of very long chain fatty acids protein OS=Ascaris suum GN=ASU_11627 PE=3 SV=1	SWIM-type zinc finger 7 associated protein 1 [Source:HGNC Symbol;Acc:HGNC:26638]
AscL3_gene_GS_12056 (pp) IPECJ2_ENSSSCG00000026812	Inter	0.978022	1	1.55196e-09	26153.5	0.978022	Elongation of very long chain fatty acids protein OS=Ascaris suum GN=ASU_11627 PE=3 SV=1	Unknown
AscL3_gene_GS_12056 (pp) IPECJ2_ENSSSCG00000012960	Inter	0.973626	1	4.59028e-09	24252.5	0.973626	Elongation of very long chain fatty acids protein OS=Ascaris suum GN=ASU_11627 PE=3 SV=1	cystatin E/M [Source:HGNC Symbol;Acc:HGNC:2478]
AscL3_gene_GS_12056 (pp) IPECJ2_ENSSSCG00000022647	Inter	0.973626	1	4.59028e-09	24252.5	0.973626	Elongation of very long chain fatty acids protein OS=Ascaris suum GN=ASU_11627 PE=3 SV=1	translocase of inner mitochondrial membrane 17 homolog B (yeast) [Source:HGNC Symbol;Acc:HGNC:17310]
AscL3_gene_GS_12056 (pp) IPECJ2_ENSSSCG00000007472	Inter	0.973626	1	4.59028e-09	24252.5	0.973626	Elongation of very long chain fatty acids protein OS=Ascaris suum GN=ASU_11627 PE=3 SV=1	breast carcinoma amplified sequence 4 [Source:HGNC Symbol;Acc:HGNC:14367]
AscL3_gene_GS_12056 (pp) IPECJ2_ENSSSCG00000012784	Inter	0.973626	1	4.59028e-09	24252.5	0.973626	Elongation of very long chain fatty acids protein OS=Ascaris suum GN=ASU_11627 PE=3 SV=1	signal sequence receptor subunit 4 [Source:HGNC Symbol;Acc:HGNC:11326]
AscL3_gene_GS_12056 (pp) IPECJ2_ENSSSCG00000012916	Inter	0.969231	1	1.14652e-08	21732.5	0.969231	Elongation of very long chain fatty acids protein OS=Ascaris suum GN=ASU_11627 PE=3 SV=1	Unknown
AscL3_gene_GS_12056 (pp) IPECJ2_ENSSSCG00000012965	Inter	0.969231	1	1.14652e-08	21732.5	0.969231	Elongation of very long chain fatty acids protein OS=Ascaris suum GN=ASU_11627 PE=3 SV=1	DR1 associated protein 1 [Source:HGNC Symbol;Acc:HGNC:3019]
AscL3_gene_GS_12056 (pp) IPECJ2_ENSSSCG00000029161	Inter	0.973626	1	4.59028e-09	24252.5	0.973626	Elongation of very long chain fatty acids protein OS=Ascaris suum GN=ASU_11627 PE=3 SV=1	acireductone dioxygenase 1 [Source:HGNC Symbol;Acc:HGNC:30576]
AscL3_gene_GS_12056 (pp) IPECJ2_ENSSSCG00000001423	Inter	0.969231	1	1.14652e-08	21732.5	0.969231	Elongation of very long chain fatty acids protein OS=Ascaris suum GN=ASU_11627 PE=3 SV=1	negative elongation factor complex member E [Source:HGNC Symbol;Acc:HGNC:13974]
AscL3_gene_GS_12056 (pp) IPECJ2_ENSSSCG00000027840	Inter	0.969231	1	1.14652e-08	21732.5	0.969231	Elongation of very long chain fatty acids protein OS=Ascaris suum GN=ASU_11627 PE=3 SV=1	Unknown
AscL3_gene_GS_12056 (pp) IPECJ2_ENSSSCG00000029362	Inter	0.969231	1	1.14652e-08	21732.5	0.969231	Elongation of very long chain fatty acids protein OS=Ascaris suum GN=ASU_11627 PE=3 SV=1	charged multivesicular body protein 2A [Source:HGNC Symbol;Acc:HGNC:30216]
AscL3_gene_GS_12056 (pp) IPECJ2_ENSSSCG00000013267	Inter	0.969231	1	1.14652e-08	21732.5	0.969231	Elongation of very long chain fatty acids protein OS=Ascaris suum GN=ASU_11627 PE=3 SV=1	peroxisomal biogenesis factor 16 [Source:HGNC Symbol;Acc:HGNC:8857]
AscL3_gene_GS_12056 (pp) IPECJ2_ENSSSCG00000020817	Inter	0.969231	1	1.14652e-08	21732.5	0.969231	Elongation of very long chain fatty acids protein OS=Ascaris suum GN=ASU_11627 PE=3 SV=1	40S ribosomal protein S16 [Source:UniProtKB/Swiss-Prot;Acc:Q29201]
AscL3_gene_GS_12056 (pp) IPECJ2_ENSSSCG00000024974	Inter	0.964835	1	2.53041e-08	18397.5	0.964835	Elongation of very long chain fatty acids protein OS=Ascaris suum GN=ASU_11627 PE=3 SV=1	ribosomal protein L13 [Source:HGNC Symbol;Acc:HGNC:10303]
AscL3_gene_GS_12056 (pp) IPECJ2_XLOC_007562	Inter	0.964835	1	2.53041e-08	18397.5	0.964835	Elongation of very long chain fatty acids protein OS=Ascaris suum GN=ASU_11627 PE=3 SV=1	Unknown
AscL3_gene_GS_12056 (pp) IPECJ2_ENSSSCG00000000061	Inter	0.964835	1	2.53041e-08	18397.5	0.964835	Elongation of very long chain fatty acids protein OS=Ascaris suum GN=ASU_11627 PE=3 SV=1	phosphomannomutase 1 [Source:HGNC Symbol;Acc:HGNC:9114]
AscL3_gene_GS_12056 (pp) IPECJ2_ENSSSCG00000020790	Inter	0.964835	1	2.53041e-08	18397.5	0.964835	Elongation of very long chain fatty acids protein OS=Ascaris suum GN=ASU_11627 PE=3 SV=1	Uncharacterized protein OS=Sus scrofa GN=MYEOV2 PE=1 SV=1
AscL3_gene_GS_12056 (pp) IPECJ2_ENSSSCG00000023139	Inter	0.96044	1	5.08105e-08	14245.5	0.96044	Elongation of very long chain fatty acids protein OS=Ascaris suum GN=ASU_11627 PE=3 SV=1	Isoform 2 of Methyltransferase-like protein 23 OS=Homo sapiens GN=METTL23
IPECJ2_ENSSSCG00000015073 (pp) IPECJ2_ENSSSCG00000028378	Intra	0.956044	-1	9.46978e-08	9305.5	-0.956044	transgelin [Source:HGNC Symbol;Acc:HGNC:11553]	Unknown
AscL3_gene_GS_12056 (pp) IPECJ2_ENSSSCG00000025928	Inter	0.96044	1	5.08105e-08	14245.5	0.96044	Elongation of very long chain fatty acids protein OS=Ascaris suum GN=ASU_11627 PE=3 SV=1	ribosomal protein L18 [Source:HGNC Symbol;Acc:HGNC:10310]
AscL3_gene_GS_12056 (pp) IPECJ2_ENSSSCG00000013002	Inter	0.96044	1	5.08105e-08	14245.5	0.96044	Elongation of very long chain fatty acids protein OS=Ascaris suum GN=ASU_11627 PE=3 SV=1	FAU, ubiquitin like and ribosomal protein S30 fusion [Source:HGNC Symbol;Acc:HGNC:3597]
AscL3_gene_GS_12056 (pp) IPECJ2_ENSSSCG00000014177	Inter	0.96044	-1	5.08105e-08	14245.5	-0.96044	Elongation of very long chain fatty acids protein OS=Ascaris suum GN=ASU_11627 PE=3 SV=1	chromodomain helicase DNA binding protein 1 [Source:HGNC Symbol;Acc:HGNC:1915]
AscL3_gene_GS_12056 (pp) IPECJ2_ENSSSCG00000004970	Inter	0.956044	1	9.46978e-08	9305.5	0.956044	Elongation of very long chain fatty acids protein OS=Ascaris suum GN=ASU_11627 PE=3 SV=1	Unknown
IPECJ2_ENSSSCG00000015201 (pp) IPECJ2_ENSSSCG00000024984	Intra	0.969231	-1	3.28443e-06	21732.5	-0.969231	Uncharacterized protein OS=Sus scrofa GN=MSANTD2 PE=4 SV=1	Unknown
AscL3_gene_GS_12056 (pp) IPECJ2_ENSSSCG00000007646	Inter	0.956044	1	9.46978e-08	9305.5	0.956044	Elongation of very long chain fatty acids protein OS=Ascaris suum GN=ASU_11627 PE=3 SV=1	late endosomal/lysosomal adaptor, MAPK and MTOR activator 4 [Source:HGNC Symbol;Acc:HGNC:33772]
IPECJ2_ENSSSCG00000015201 (pp) AscL3_gene_L3E_01572	Inter	0.951648	1	1.41528e-05	3309.5	0.951648	Uncharacterized protein OS=Sus scrofa GN=MSANTD2 PE=4 SV=1	Bm1034 OS=Brugia malayi GN=Bm1034 PE=4 SV=1
AscL3_gene_GS_12056 (pp) IPECJ2_ENSSSCG00000029034	Inter	0.96044	1	5.08105e-08	14245.5	0.96044	Elongation of very long chain fatty acids protein OS=Ascaris suum GN=ASU_11627 PE=3 SV=1	cytochrome c oxidase subunit 4I1 [Source:HGNC Symbol;Acc:HGNC:2265]
IPECJ2_ENSSSCG00000015201 (pp) IPECJ2_ENSSSCG00000008600	Intra	0.969231	1	3.28443e-06	21732.5	0.969231	Uncharacterized protein OS=Sus scrofa GN=MSANTD2 PE=4 SV=1	pumilio RNA binding family member 2 [Source:HGNC Symbol;Acc:HGNC:14958]
AscL3_gene_GS_12056 (pp) IPECJ2_ENSSSCG00000001884	Inter	0.956044	1	9.46978e-08	9305.5	0.956044	Elongation of very long chain fatty acids protein OS=Ascaris suum GN=ASU_11627 PE=3 SV=1	COMM domain containing 4 [Source:HGNC Symbol;Acc:HGNC:26027]
AscL3_gene_GS_12056 (pp) IPECJ2_ENSSSCG00000029855	Inter	0.956044	1	9.46978e-08	9305.5	0.956044	Elongation of very long chain fatty acids protein OS=Ascaris suum GN=ASU_11627 PE=3 SV=1	lipoma HMGIC fusion partner [Source:HGNC Symbol;Acc:HGNC:6586]
AscL3_gene_GS_12056 (pp) IPECJ2_ENSSSCG00000007160	Inter	0.951648	1	1.66161e-07	3309.5	0.951648	Elongation of very long chain fatty acids protein OS=Ascaris suum GN=ASU_11627 PE=3 SV=1	DDRGK domain containing 1 [Source:HGNC Symbol;Acc:HGNC:16110]
AscL3_gene_GS_12056 (pp) IPECJ2_ENSSSCG00000016395	Inter	0.956044	-1	9.46978e-08	9305.5	-0.956044	Elongation of very long chain fatty acids protein OS=Ascaris suum GN=ASU_11627 PE=3 SV=1	replication timing regulatory factor 1 [Source:HGNC Symbol;Acc:HGNC:23207]
AscL3_gene_GS_12056 (pp) IPECJ2_ENSSSCG00000017114	Inter	0.956044	1	9.46978e-08	9305.5	0.956044	Elongation of very long chain fatty acids protein OS=Ascaris suum GN=ASU_11627 PE=3 SV=1	NADH:ubiquinone oxidoreductase subunit S6 [Source:HGNC Symbol;Acc:HGNC:7713]
IPECJ2_ENSSSCG00000023139 (pp) IPECJ2_ENSSSCG00000012784	Intra	0.978022	1	1.55196e-09	26153.5	0.978022	Isoform 2 of Methyltransferase-like protein 23 OS=Homo sapiens GN=METTL23	signal sequence receptor subunit 4 [Source:HGNC Symbol;Acc:HGNC:11326]
AscL3_gene_GS_12056 (pp) IPECJ2_ENSSSCG00000012842	Inter	0.951648	1	1.66161e-07	3309.5	0.951648	Elongation of very long chain fatty acids protein OS=Ascaris suum GN=ASU_11627 PE=3 SV=1	Unknown
IPECJ2_ENSSSCG00000023139 (pp) IPECJ2_ENSSSCG00000007646	Intra	0.973626	1	4.59028e-09	24252.5	0.973626	Isoform 2 of Methyltransferase-like protein 23 OS=Homo sapiens GN=METTL23	late endosomal/lysosomal adaptor, MAPK and MTOR activator 4 [Source:HGNC Symbol;Acc:HGNC:33772]
AscL3_gene_GS_13356 (pp) IPECJ2_ENSSSCG00000006090	Inter	0.969231	-1	1.14652e-08	21732.5	-0.969231	STE20/SPS1-related proline-alanine-rich protein kinase OS=Ascaris suum GN=ASU_07761 PE=2 SV=1	mitochondrial transcription termination factor 3 [Source:HGNC Symbol;Acc:HGNC:24258]
AscL3_gene_GS_12056 (pp) IPECJ2_ENSSSCG00000007189	Inter	0.951648	1	1.66161e-07	3309.5	0.951648	Elongation of very long chain fatty acids protein OS=Ascaris suum GN=ASU_11627 PE=3 SV=1	syndecan binding protein 2 [Source:HGNC Symbol;Acc:HGNC:15756]
IPECJ2_ENSSSCG00000023139 (pp) IPECJ2_ENSSSCG00000026812	Intra	0.982418	1	4.10718e-10	27446.5	0.982418	Isoform 2 of Methyltransferase-like protein 23 OS=Homo sapiens GN=METTL23	Unknown
AscL3_gene_GS_12056 (pp) IPECJ2_ENSSSCG00000012727	Inter	0.951648	-1	1.66161e-07	3309.5	-0.951648	Elongation of very long chain fatty acids protein OS=Ascaris suum GN=ASU_11627 PE=3 SV=1	fragile X mental retardation 1 [Source:HGNC Symbol;Acc:HGNC:3775]
AscL3_gene_GS_13390 (pp) IPECJ2_ENSSSCG00000009401	Inter	0.964835	1	2.53041e-08	18397.5	0.964835	WD repeat domain phosphoinositide-interacting protein 2 OS=Ascaris suum GN=ASU_00103 PE=2 SV=1	RB transcriptional corepressor 1 [Source:HGNC Symbol;Acc:HGNC:9884]
IPECJ2_ENSSSCG00000023139 (pp) IPECJ2_ENSSSCG00000027971	Intra	0.973626	1	4.59028e-09	24252.5	0.973626	Isoform 2 of Methyltransferase-like protein 23 OS=Homo sapiens GN=METTL23	regulatory factor X associated ankyrin containing protein [Source:HGNC Symbol;Acc:HGNC:9987]
AscL3_gene_GS_13390 (pp) IPECJ2_ENSSSCG00000027223	Inter	0.951648	1	1.66161e-07	3309.5	0.951648	WD repeat domain phosphoinositide-interacting protein 2 OS=Ascaris suum GN=ASU_00103 PE=2 SV=1	THAP domain containing 1 [Source:HGNC Symbol;Acc:HGNC:20856]
AscL3_gene_GS_13356 (pp) IPECJ2_ENSSSCG00000022417	Inter	0.969231	1	1.14652e-08	21732.5	0.969231	STE20/SPS1-related proline-alanine-rich protein kinase OS=Ascaris suum GN=ASU_07761 PE=2 SV=1	hepatocyte nuclear factor 1-beta [Source:RefSeq peptide;Acc:NP_999121]
IPECJ2_ENSSSCG00000023139 (pp) IPECJ2_ENSSSCG00000012965	Intra	0.973626	1	4.59028e-09	24252.5	0.973626	Isoform 2 of Methyltransferase-like protein 23 OS=Homo sapiens GN=METTL23	DR1 associated protein 1 [Source:HGNC Symbol;Acc:HGNC:3019]
IPECJ2_ENSSSCG00000023139 (pp) IPECJ2_ENSSSCG00000020817	Intra	0.973626	1	1.97568e-06	24252.5	0.973626	Isoform 2 of Methyltransferase-like protein 23 OS=Homo sapiens GN=METTL23	40S ribosomal protein S16 [Source:UniProtKB/Swiss-Prot;Acc:Q29201]
AscL3_gene_GS_13356 (pp) IPECJ2_ENSSSCG00000005097	Inter	0.964835	-1	2.53041e-08	18397.5	-0.964835	STE20/SPS1-related proline-alanine-rich protein kinase OS=Ascaris suum GN=ASU_07761 PE=2 SV=1	small nuclear RNA activating complex polypeptide 1 [Source:HGNC Symbol;Acc:HGNC:11134]
AscL3_gene_GS_15926 (pp) IPECJ2_XLOC_010852	Inter	0.956044	1	9.46978e-08	9305.5	0.956044	Cral-trio domain-containing protein OS=Ascaris suum GN=ASU_06993 PE=4 SV=1	Unknown
AscL3_gene_GS_17130 (pp) IPECJ2_ENSSSCG00000027575	Inter	0.96044	-1	5.08105e-08	14245.5	-0.96044	Tyrosinase-like protein tyr-3 OS=Ascaris suum GN=ASU_08505 PE=4 SV=1	RELB proto-oncogene, NF-kB subunit [Source:HGNC Symbol;Acc:HGNC:9956]
AscL3_gene_GS_15118 (pp) IPECJ2_ENSSSCG00000012624	Inter	0.964835	-1	2.53041e-08	18397.5	-0.964835	Sodium hydrogen exchanger 9b2 OS=Ascaris suum GN=ASU_04428 PE=4 SV=1	solute carrier family 25 member 43 [Source:HGNC Symbol;Acc:HGNC:30557]
AscL3_gene_GS_15118 (pp) AscL3_XLOC_017084	Intra	0.96044	-1	5.08105e-08	14245.5	-0.96044	Sodium hydrogen exchanger 9b2 OS=Ascaris suum GN=ASU_04428 PE=4 SV=1	Unknown
IPECJ2_ENSSSCG00000023139 (pp) IPECJ2_ENSSSCG00000017705	Intra	0.964835	1	5.02606e-06	18397.5	0.964835	Isoform 2 of Methyltransferase-like protein 23 OS=Homo sapiens GN=METTL23	C-C motif chemokine ligand 5 [Source:HGNC Symbol;Acc:HGNC:10632]
AscL3_gene_GS_17429 (pp) IPECJ2_ENSSSCG00000007119	Inter	0.964835	-1	2.53041e-08	18397.5	-0.964835	Uncharacterized protein OS=Ascaris suum GN=ASU_07317 PE=4 SV=1	nuclear transport factor 2 like export factor 1 [Source:HGNC Symbol;Acc:HGNC:15913]
IPECJ2_ENSSSCG00000023139 (pp) IPECJ2_ENSSSCG00000020790	Intra	0.964835	1	5.02606e-06	18397.5	0.964835	Isoform 2 of Methyltransferase-like protein 23 OS=Homo sapiens GN=METTL23	Uncharacterized protein OS=Sus scrofa GN=MYEOV2 PE=1 SV=1
AscL3_gene_GS_17433 (pp) IPECJ2_XLOC_015009	Inter	0.956044	1	9.46978e-08	9305.5	0.956044	Receptor-type tyrosine-protein phosphatase c OS=Ascaris suum GN=ASU_10873 PE=4 SV=1	Unknown
AscL3_gene_GS_17429 (pp) AscL3_gene_GS_04352	Intra	0.986813	1	1.88722e-07	28223.5	0.986813	Uncharacterized protein OS=Ascaris suum GN=ASU_07317 PE=4 SV=1	Nematode cuticle collagen domain-containing protein OS=Ascaris suum GN=ASU_04661 PE=4 SV=1
AscL3_gene_GS_17429 (pp) IPECJ2_ENSSSCG00000003015	Inter	0.969231	-1	1.14652e-08	21732.5	-0.969231	Uncharacterized protein OS=Ascaris suum GN=ASU_07317 PE=4 SV=1	Unknown
AscL3_gene_GS_18003 (pp) IPECJ2_ENSSSCG00000024663	Inter	0.964835	-1	2.53041e-08	18397.5	-0.964835	Succinyl-CoA:3-ketoacid-coenzyme A transferase OS=Ascaris suum GN=ASU_13672 PE=3 SV=1	spindle and centriole associated protein 1 [Source:HGNC Symbol;Acc:HGNC:25083]
IPECJ2_ENSSSCG00000023139 (pp) IPECJ2_ENSSSCG00000029034	Intra	0.964835	1	2.53041e-08	18397.5	0.964835	Isoform 2 of Methyltransferase-like protein 23 OS=Homo sapiens GN=METTL23	cytochrome c oxidase subunit 4I1 [Source:HGNC Symbol;Acc:HGNC:2265]
AscL3_gene_GS_18153 (pp) AscL3_XLOC_017084	Intra	0.964835	-1	5.02606e-06	18397.5	-0.964835	Histone RNA hairpin-binding protein OS=Ascaris suum PE=2 SV=1	Unknown
AscL3_gene_GS_17516 (pp) IPECJ2_ENSSSCG00000022070	Inter	0.956044	-1	9.46978e-08	9305.5	-0.956044	Solute carrier family facilitated glucose transporter member 3 OS=Ascaris suum GN=ASU_08638 PE=3 SV=1	zinc finger protein 143 [Source:HGNC Symbol;Acc:HGNC:12928]
IPECJ2_ENSSSCG00000023139 (pp) IPECJ2_ENSSSCG00000024974	Intra	0.964835	1	2.53041e-08	18397.5	0.964835	Isoform 2 of Methyltransferase-like protein 23 OS=Homo sapiens GN=METTL23	ribosomal protein L13 [Source:HGNC Symbol;Acc:HGNC:10303]
IPECJ2_ENSSSCG00000023139 (pp) IPECJ2_ENSSSCG00000025928	Intra	0.964835	1	2.53041e-08	18397.5	0.964835	Isoform 2 of Methyltransferase-like protein 23 OS=Homo sapiens GN=METTL23	ribosomal protein L18 [Source:HGNC Symbol;Acc:HGNC:10310]
AscL3_gene_GS_17972 (pp) IPECJ2_XLOC_010852	Inter	0.951648	1	1.66161e-07	3309.5	0.951648	Neuronal symmetry family member (Nsy-4) OS=Ascaris suum GN=ASU_02089 PE=4 SV=1	Unknown
IPECJ2_ENSSSCG00000023139 (pp) IPECJ2_ENSSSCG00000000061	Intra	0.96044	1	5.08105e-08	14245.5	0.96044	Isoform 2 of Methyltransferase-like protein 23 OS=Homo sapiens GN=METTL23	phosphomannomutase 1 [Source:HGNC Symbol;Acc:HGNC:9114]
IPECJ2_ENSSSCG00000023139 (pp) IPECJ2_ENSSSCG00000010631	Intra	0.96044	-1	5.08105e-08	14245.5	-0.96044	Isoform 2 of Methyltransferase-like protein 23 OS=Homo sapiens GN=METTL23	glycerol-3-phosphate acyltransferase, mitochondrial [Source:HGNC Symbol;Acc:HGNC:24865]
AscL3_gene_GS_19483 (pp) IPECJ2_ENSSSCG00000011953	Inter	0.96044	1	5.08105e-08	14245.5	0.96044	WD repeat-containing protein tag-125 OS=Caenorhabditis briggsae GN=tag-125 PE=4 SV=1	zinc finger and BTB domain containing 11 [Source:HGNC Symbol;Acc:HGNC:16740]
IPECJ2_ENSSSCG00000023139 (pp) IPECJ2_ENSSSCG00000029362	Intra	0.964835	1	2.53041e-08	18397.5	0.964835	Isoform 2 of Methyltransferase-like protein 23 OS=Homo sapiens GN=METTL23	charged multivesicular body protein 2A [Source:HGNC Symbol;Acc:HGNC:30216]
AscL3_gene_GS_18153 (pp) AscL3_gene_GS_21074	Intra	0.956044	-1	1.04633e-05	9305.5	-0.956044	Histone RNA hairpin-binding protein OS=Ascaris suum PE=2 SV=1	Forkhead box protein P1 OS=Ascaris suum PE=2 SV=1
IPECJ2_ENSSSCG00000023139 (pp) IPECJ2_XLOC_029898	Intra	0.964835	1	2.53041e-08	18397.5	0.964835	Isoform 2 of Methyltransferase-like protein 23 OS=Homo sapiens GN=METTL23	Proteasome subunit beta type-7 OS=Sus scrofa GN=PSMB7 PE=2 SV=2
AscL3_gene_GS_18153 (pp) IPECJ2_ENSSSCG00000015201	Inter	0.951648	-1	1.66161e-07	3309.5	-0.951648	Histone RNA hairpin-binding protein OS=Ascaris suum PE=2 SV=1	Uncharacterized protein OS=Sus scrofa GN=MSANTD2 PE=4 SV=1
AscL3_gene_GS_19483 (pp) IPECJ2_ENSSSCG00000011874	Inter	0.951648	1	1.66161e-07	3309.5	0.951648	WD repeat-containing protein tag-125 OS=Caenorhabditis briggsae GN=tag-125 PE=4 SV=1	poly(ADP-ribose) polymerase family member 14 [Source:HGNC Symbol;Acc:HGNC:29232]
AscL3_gene_GS_20549 (pp) IPECJ2_ENSSSCG00000012556	Inter	0.973626	-1	4.59028e-09	24252.5	-0.973626	Uncharacterized protein OS=Ascaris lumbricoides PE=4 SV=1	RNA binding motif protein 41 [Source:HGNC Symbol;Acc:HGNC:25617]
IPECJ2_ENSSSCG00000023139 (pp) IPECJ2_ENSSSCG00000019018	Intra	0.96044	1	5.08105e-08	14245.5	0.96044	Isoform 2 of Methyltransferase-like protein 23 OS=Homo sapiens GN=METTL23	Unknown
AscL3_gene_GS_19483 (pp) IPECJ2_ENSSSCG00000025820	Inter	0.956044	1	9.46978e-08	9305.5	0.956044	WD repeat-containing protein tag-125 OS=Caenorhabditis briggsae GN=tag-125 PE=4 SV=1	solute carrier family 15 member 4 [Source:HGNC Symbol;Acc:HGNC:23090]
IPECJ2_ENSSSCG00000023139 (pp) IPECJ2_ENSSSCG00000027353	Intra	0.96044	1	5.08105e-08	14245.5	0.96044	Isoform 2 of Methyltransferase-like protein 23 OS=Homo sapiens GN=METTL23	Unknown
AscL3_gene_GS_19483 (pp) IPECJ2_ENSSSCG00000002387	Inter	0.951648	1	1.66161e-07	3309.5	0.951648	WD repeat-containing protein tag-125 OS=Caenorhabditis briggsae GN=tag-125 PE=4 SV=1	G-patch domain containing 2 like [Source:HGNC Symbol;Acc:HGNC:20210]
AscL3_gene_GS_21074 (pp) AscL3_XLOC_017084	Intra	0.96044	1	7.40017e-06	14245.5	0.96044	Forkhead box protein P1 OS=Ascaris suum PE=2 SV=1	Unknown
AscL3_gene_GS_21074 (pp) IPECJ2_ENSSSCG00000003670	Inter	0.96044	1	5.08105e-08	14245.5	0.96044	Forkhead box protein P1 OS=Ascaris suum PE=2 SV=1	rearranged L-myc fusion [Source:HGNC Symbol;Acc:HGNC:10025]
IPECJ2_ENSSSCG00000023139 (pp) IPECJ2_ENSSSCG00000013267	Intra	0.956044	1	9.46978e-08	9305.5	0.956044	Isoform 2 of Methyltransferase-like protein 23 OS=Homo sapiens GN=METTL23	peroxisomal biogenesis factor 16 [Source:HGNC Symbol;Acc:HGNC:8857]
AscL3_gene_GS_20549 (pp) IPECJ2_ENSSSCG00000003462	Inter	0.96044	-1	5.08105e-08	14245.5	-0.96044	Uncharacterized protein OS=Ascaris lumbricoides PE=4 SV=1	DNA damage inducible 1 homolog 2 [Source:HGNC Symbol;Acc:HGNC:24578]
IPECJ2_ENSSSCG00000023139 (pp) IPECJ2_ENSSSCG00000021825	Intra	0.956044	1	1.04633e-05	9305.5	0.956044	Isoform 2 of Methyltransferase-like protein 23 OS=Homo sapiens GN=METTL23	40S ribosomal protein S21 [Source:UniProtKB/Swiss-Prot;Acc:P63221]
AscL3_gene_GS_22808 (pp) IPECJ2_ENSSSCG00000022398	Inter	0.964835	1	2.53041e-08	18397.5	0.964835	227 kDa spindle- and centromere-associated protein OS=Parascaris univalens GN=PUMA1 PE=2 SV=1	nuclear casein kinase and cyclin dependent kinase substrate 1 [Source:HGNC Symbol;Acc:HGNC:29923]
IPECJ2_ENSSSCG00000023139 (pp) IPECJ2_ENSSSCG00000029161	Intra	0.951648	1	1.66161e-07	3309.5	0.951648	Isoform 2 of Methyltransferase-like protein 23 OS=Homo sapiens GN=METTL23	acireductone dioxygenase 1 [Source:HGNC Symbol;Acc:HGNC:30576]
IPECJ2_ENSSSCG00000023139 (pp) IPECJ2_ENSSSCG00000007472	Intra	0.951648	1	1.66161e-07	3309.5	0.951648	Isoform 2 of Methyltransferase-like protein 23 OS=Homo sapiens GN=METTL23	breast carcinoma amplified sequence 4 [Source:HGNC Symbol;Acc:HGNC:14367]
AscL3_gene_GS_21074 (pp) AscL3_gene_L3E_01572	Intra	0.951648	1	1.66161e-07	3309.5	0.951648	Forkhead box protein P1 OS=Ascaris suum PE=2 SV=1	Bm1034 OS=Brugia malayi GN=Bm1034 PE=4 SV=1
AscL3_gene_GS_21074 (pp) IPECJ2_ENSSSCG00000023960	Inter	0.951648	1	1.66161e-07	3309.5	0.951648	Forkhead box protein P1 OS=Ascaris suum PE=2 SV=1	Unknown
AscL3_gene_GS_23463 (pp) IPECJ2_ENSSSCG00000006530	Inter	0.951648	-1	1.66161e-07	3309.5	-0.951648	Uncharacterized protein OS=Ascaris suum GN=ASU_11150 PE=4 SV=1	ephrin-A1 [Source:HGNC Symbol;Acc:HGNC:3221]
AscL3_gene_GS_24029 (pp) IPECJ2_ENSSSCG00000027248	Inter	0.96044	-1	5.08105e-08	14245.5	-0.96044	1,2-dihydroxy-3-keto-5-methylthiopentene dioxygenase homolog OS=Ascaris suum GN=ASU_02170 PE=3 SV=1	Unknown
IPECJ2_ENSSSCG00000015386 (pp) IPECJ2_XLOC_005381	Intra	0.973626	-1	4.59028e-09	24252.5	-0.973626	family with sequence similarity 126 member A [Source:HGNC Symbol;Acc:HGNC:24587]	Unknown
AscL3_gene_GS_23463 (pp) IPECJ2_XLOC_001547	Inter	0.964835	-1	2.53041e-08	18397.5	-0.964835	Uncharacterized protein OS=Ascaris suum GN=ASU_11150 PE=4 SV=1	Unknown
AscL3_gene_GS_23463 (pp) IPECJ2_ENSSSCG00000024201	Inter	0.96044	1	5.08105e-08	14245.5	0.96044	Uncharacterized protein OS=Ascaris suum GN=ASU_11150 PE=4 SV=1	family with sequence similarity 208 member A [Source:HGNC Symbol;Acc:HGNC:30314]
IPECJ2_ENSSSCG00000015386 (pp) IPECJ2_ENSSSCG00000009479	Intra	0.978022	1	1.07614e-06	26153.5	0.978022	family with sequence similarity 126 member A [Source:HGNC Symbol;Acc:HGNC:24587]	RNA binding motif protein 26 [Source:HGNC Symbol;Acc:HGNC:20327]
AscL3_gene_L3E_01572 (pp) AscL3_gene_GS_09942	Intra	0.956044	1	1.04633e-05	9305.5	0.956044	Bm1034 OS=Brugia malayi GN=Bm1034 PE=4 SV=1	Sperm-specific protein OS=Ascaris suum GN=ASU_04668 PE=4 SV=1
IPECJ2_ENSSSCG00000015386 (pp) IPECJ2_XLOC_023587	Intra	0.964835	-1	2.53041e-08	18397.5	-0.964835	family with sequence similarity 126 member A [Source:HGNC Symbol;Acc:HGNC:24587]	IL-23 (Fragment) OS=Sus scrofa PE=2 SV=1
AscL3_gene_L3E_01572 (pp) IPECJ2_ENSSSCG00000021542	Inter	0.956044	-1	9.46978e-08	9305.5	-0.956044	Bm1034 OS=Brugia malayi GN=Bm1034 PE=4 SV=1	Unknown
IPECJ2_ENSSSCG00000015386 (pp) IPECJ2_ENSSSCG00000014283	Intra	0.96044	1	7.40017e-06	14245.5	0.96044	family with sequence similarity 126 member A [Source:HGNC Symbol;Acc:HGNC:24587]	kinesin family member 3A [Source:HGNC Symbol;Acc:HGNC:6319]
AscL3_gene_L3E_01572 (pp) IPECJ2_ENSSSCG00000009479	Inter	0.973626	1	4.59028e-09	24252.5	0.973626	Bm1034 OS=Brugia malayi GN=Bm1034 PE=4 SV=1	RNA binding motif protein 26 [Source:HGNC Symbol;Acc:HGNC:20327]
AscL3_gene_L3E_01572 (pp) IPECJ2_ENSSSCG00000014283	Inter	0.964835	1	2.53041e-08	18397.5	0.964835	Bm1034 OS=Brugia malayi GN=Bm1034 PE=4 SV=1	kinesin family member 3A [Source:HGNC Symbol;Acc:HGNC:6319]
IPECJ2_ENSSSCG00000007100 (pp) AscL3_gene_GS_02546	Inter	0.956044	-1	1.04633e-05	9305.5	-0.956044	solute carrier family 24 member 3 [Source:HGNC Symbol;Acc:HGNC:10977]	Venom allergen 5 OS=Ascaris suum GN=ASU_02857 PE=3 SV=1
AscL3_gene_L3E_01572 (pp) IPECJ2_ENSSSCG00000008600	Inter	0.951648	1	1.66161e-07	3309.5	0.951648	Bm1034 OS=Brugia malayi GN=Bm1034 PE=4 SV=1	pumilio RNA binding family member 2 [Source:HGNC Symbol;Acc:HGNC:14958]
AscL3_gene_L3E_01572 (pp) IPECJ2_ENSSSCG00000015386	Inter	0.951648	1	1.66161e-07	3309.5	0.951648	Bm1034 OS=Brugia malayi GN=Bm1034 PE=4 SV=1	family with sequence similarity 126 member A [Source:HGNC Symbol;Acc:HGNC:24587]
IPECJ2_ENSSSCG00000015386 (pp) IPECJ2_ENSSSCG00000025293	Intra	0.951648	1	1.66161e-07	3309.5	0.951648	family with sequence similarity 126 member A [Source:HGNC Symbol;Acc:HGNC:24587]	helicase like transcription factor [Source:HGNC Symbol;Acc:HGNC:11099]
IPECJ2_ENSSSCG00000007100 (pp) IPECJ2_ENSSSCG00000000508	Intra	0.956044	-1	1.04633e-05	9305.5	-0.956044	solute carrier family 24 member 3 [Source:HGNC Symbol;Acc:HGNC:10977]	Unknown
AscL3_gene_L3E_01572 (pp) IPECJ2_ENSSSCG00000024984	Inter	0.956044	-1	9.46978e-08	9305.5	-0.956044	Bm1034 OS=Brugia malayi GN=Bm1034 PE=4 SV=1	Unknown
AscL3_gene_L3E_01572 (pp) IPECJ2_ENSSSCG00000002646	Inter	0.951648	-1	1.66161e-07	3309.5	-0.951648	Bm1034 OS=Brugia malayi GN=Bm1034 PE=4 SV=1	trafficking protein particle complex 2 like [Source:HGNC Symbol;Acc:HGNC:30887]
AscL3_gene_L3E_01572 (pp) IPECJ2_ENSSSCG00000025868	Inter	0.951648	-1	1.66161e-07	3309.5	-0.951648	Bm1034 OS=Brugia malayi GN=Bm1034 PE=4 SV=1	Unknown
IPECJ2_ENSSSCG00000015386 (pp) IPECJ2_ENSSSCG00000029034	Intra	0.951648	-1	1.66161e-07	3309.5	-0.951648	family with sequence similarity 126 member A [Source:HGNC Symbol;Acc:HGNC:24587]	cytochrome c oxidase subunit 4I1 [Source:HGNC Symbol;Acc:HGNC:2265]
IPECJ2_ENSSSCG00000007119 (pp) IPECJ2_ENSSSCG00000012905	Intra	0.969231	1	3.28443e-06	21732.5	0.969231	nuclear transport factor 2 like export factor 1 [Source:HGNC Symbol;Acc:HGNC:15913]	transmembrane protein 134 [Source:HGNC Symbol;Acc:HGNC:26142]
IPECJ2_ENSSSCG00000015386 (pp) IPECJ2_XLOC_029898	Intra	0.951648	-1	1.66161e-07	3309.5	-0.951648	family with sequence similarity 126 member A [Source:HGNC Symbol;Acc:HGNC:24587]	Proteasome subunit beta type-7 OS=Sus scrofa GN=PSMB7 PE=2 SV=2
IPECJ2_ENSSSCG00000007119 (pp) IPECJ2_ENSSSCG00000023325	Intra	0.969231	1	3.28443e-06	21732.5	0.969231	nuclear transport factor 2 like export factor 1 [Source:HGNC Symbol;Acc:HGNC:15913]	Aminoacylase-1 [Source:UniProtKB/Swiss-Prot;Acc:P37111]
AscL3_gene_L3E_01572 (pp) IPECJ2_XLOC_023587	Inter	0.951648	-1	1.66161e-07	3309.5	-0.951648	Bm1034 OS=Brugia malayi GN=Bm1034 PE=4 SV=1	IL-23 (Fragment) OS=Sus scrofa PE=2 SV=1
AscL3_gene_L3E_01572 (pp) IPECJ2_ENSSSCG00000016835	Inter	0.951648	1	1.66161e-07	3309.5	0.951648	Bm1034 OS=Brugia malayi GN=Bm1034 PE=4 SV=1	S-phase kinase-associated protein 2, E3 ubiquitin protein ligase [Source:HGNC Symbol;Acc:HGNC:10901]
IPECJ2_ENSSSCG00000007100 (pp) AscL3_gene_Liv_03967	Inter	0.951648	-1	1.41528e-05	3309.5	-0.951648	solute carrier family 24 member 3 [Source:HGNC Symbol;Acc:HGNC:10977]	Venom allergen 5 OS=Ascaris suum GN=ASU_02857 PE=3 SV=1
IPECJ2_ENSSSCG00000015386 (pp) IPECJ2_ENSSSCG00000025928	Intra	0.951648	-1	1.41528e-05	3309.5	-0.951648	family with sequence similarity 126 member A [Source:HGNC Symbol;Acc:HGNC:24587]	ribosomal protein L18 [Source:HGNC Symbol;Acc:HGNC:10310]
IPECJ2_ENSSSCG00000007119 (pp) IPECJ2_ENSSSCG00000022867	Intra	0.973626	1	4.59028e-09	24252.5	0.973626	nuclear transport factor 2 like export factor 1 [Source:HGNC Symbol;Acc:HGNC:15913]	Unknown
AscL3_gene_L3E_01572 (pp) IPECJ2_ENSSSCG00000025293	Inter	0.951648	1	1.66161e-07	3309.5	0.951648	Bm1034 OS=Brugia malayi GN=Bm1034 PE=4 SV=1	helicase like transcription factor [Source:HGNC Symbol;Acc:HGNC:11099]
AscL3_gene_Liv_01915 (pp) IPECJ2_ENSSSCG00000007119	Inter	0.964835	-1	2.53041e-08	18397.5	-0.964835	Uncharacterized protein OS=Ascaris lumbricoides PE=4 SV=1	nuclear transport factor 2 like export factor 1 [Source:HGNC Symbol;Acc:HGNC:15913]
IPECJ2_ENSSSCG00000007119 (pp) IPECJ2_ENSSSCG00000027827	Intra	0.951648	1	1.66161e-07	3309.5	0.951648	nuclear transport factor 2 like export factor 1 [Source:HGNC Symbol;Acc:HGNC:15913]	UDP-galactose-4-epimerase [Source:HGNC Symbol;Acc:HGNC:4116]
AscL3_gene_Liv_01915 (pp) IPECJ2_ENSSSCG00000022867	Inter	0.964835	-1	2.53041e-08	18397.5	-0.964835	Uncharacterized protein OS=Ascaris lumbricoides PE=4 SV=1	Unknown
IPECJ2_ENSSSCG00000007119 (pp) IPECJ2_ENSSSCG00000029855	Intra	0.951648	1	1.66161e-07	3309.5	0.951648	nuclear transport factor 2 like export factor 1 [Source:HGNC Symbol;Acc:HGNC:15913]	lipoma HMGIC fusion partner [Source:HGNC Symbol;Acc:HGNC:6586]
IPECJ2_ENSSSCG00000007119 (pp) IPECJ2_ENSSSCG00000022647	Intra	0.96044	1	5.08105e-08	14245.5	0.96044	nuclear transport factor 2 like export factor 1 [Source:HGNC Symbol;Acc:HGNC:15913]	translocase of inner mitochondrial membrane 17 homolog B (yeast) [Source:HGNC Symbol;Acc:HGNC:17310]
AscL3_gene_L3E_02947 (pp) IPECJ2_ENSSSCG00000011862	Inter	0.96044	-1	5.08105e-08	14245.5	-0.96044	Unknown	mucin-13 [Source:RefSeq peptide;Acc:NP_001098763]
AscL3_gene_L3E_02947 (pp) IPECJ2_ENSSSCG00000023467	Inter	0.956044	-1	9.46978e-08	9305.5	-0.956044	Unknown	Unknown
IPECJ2_ENSSSCG00000007119 (pp) IPECJ2_ENSSSCG00000006777	Intra	0.956044	1	1.04633e-05	9305.5	0.956044	nuclear transport factor 2 like export factor 1 [Source:HGNC Symbol;Acc:HGNC:15913]	ras homolog family member C [Source:HGNC Symbol;Acc:HGNC:669]
AscL3_gene_Liv_01915 (pp) IPECJ2_ENSSSCG00000016835	Inter	0.956044	1	9.46978e-08	9305.5	0.956044	Uncharacterized protein OS=Ascaris lumbricoides PE=4 SV=1	S-phase kinase-associated protein 2, E3 ubiquitin protein ligase [Source:HGNC Symbol;Acc:HGNC:10901]
IPECJ2_ENSSSCG00000007160 (pp) IPECJ2_ENSSSCG00000020817	Intra	0.978022	1	1.07614e-06	26153.5	0.978022	DDRGK domain containing 1 [Source:HGNC Symbol;Acc:HGNC:16110]	40S ribosomal protein S16 [Source:UniProtKB/Swiss-Prot;Acc:Q29201]
AscL3_gene_Liv_03967 (pp) IPECJ2_ENSSSCG00000015073	Inter	0.973626	-1	4.59028e-09	24252.5	-0.973626	Venom allergen 5 OS=Ascaris suum GN=ASU_02857 PE=3 SV=1	transgelin [Source:HGNC Symbol;Acc:HGNC:11553]
IPECJ2_ENSSSCG00000007160 (pp) IPECJ2_ENSSSCG00000027971	Intra	0.978022	1	1.55196e-09	26153.5	0.978022	DDRGK domain containing 1 [Source:HGNC Symbol;Acc:HGNC:16110]	regulatory factor X associated ankyrin containing protein [Source:HGNC Symbol;Acc:HGNC:9987]
AscL3_gene_Liv_01915 (pp) IPECJ2_ENSSSCG00000010239	Inter	0.956044	1	9.46978e-08	9305.5	0.956044	Uncharacterized protein OS=Ascaris lumbricoides PE=4 SV=1	RUN and FYVE domain containing 2 [Source:HGNC Symbol;Acc:HGNC:19761]
IPECJ2_ENSSSCG00000007160 (pp) IPECJ2_ENSSSCG00000012842	Intra	0.986813	1	1.88722e-07	28223.5	0.986813	DDRGK domain containing 1 [Source:HGNC Symbol;Acc:HGNC:16110]	Unknown
AscL3_gene_Liv_01915 (pp) IPECJ2_ENSSSCG00000012905	Inter	0.956044	-1	9.46978e-08	9305.5	-0.956044	Uncharacterized protein OS=Ascaris lumbricoides PE=4 SV=1	transmembrane protein 134 [Source:HGNC Symbol;Acc:HGNC:26142]
IPECJ2_ENSSSCG00000007160 (pp) IPECJ2_ENSSSCG00000029362	Intra	0.986813	1	7.37952e-11	28223.5	0.986813	DDRGK domain containing 1 [Source:HGNC Symbol;Acc:HGNC:16110]	charged multivesicular body protein 2A [Source:HGNC Symbol;Acc:HGNC:30216]
AscL3_XLOC_002460 (pp) IPECJ2_ENSSSCG00000022712	Inter	0.951648	-1	1.66161e-07	3309.5	-0.951648	Unknown	Unknown
IPECJ2_ENSSSCG00000007160 (pp) IPECJ2_ENSSSCG00000025928	Intra	0.973626	1	1.97568e-06	24252.5	0.973626	DDRGK domain containing 1 [Source:HGNC Symbol;Acc:HGNC:16110]	ribosomal protein L18 [Source:HGNC Symbol;Acc:HGNC:10310]
AscL3_XLOC_004258 (pp) IPECJ2_XLOC_009159	Inter	0.96044	1	5.08105e-08	14245.5	0.96044	Unknown	Unknown
IPECJ2_ENSSSCG00000007160 (pp) IPECJ2_ENSSSCG00000029034	Intra	0.973626	1	4.59028e-09	24252.5	0.973626	DDRGK domain containing 1 [Source:HGNC Symbol;Acc:HGNC:16110]	cytochrome c oxidase subunit 4I1 [Source:HGNC Symbol;Acc:HGNC:2265]
AscL3_gene_Liv_03967 (pp) IPECJ2_ENSSSCG00000000508	Inter	0.96044	1	5.08105e-08	14245.5	0.96044	Venom allergen 5 OS=Ascaris suum GN=ASU_02857 PE=3 SV=1	Unknown
IPECJ2_ENSSSCG00000007160 (pp) IPECJ2_ENSSSCG00000007472	Intra	0.973626	1	1.97568e-06	24252.5	0.973626	DDRGK domain containing 1 [Source:HGNC Symbol;Acc:HGNC:16110]	breast carcinoma amplified sequence 4 [Source:HGNC Symbol;Acc:HGNC:14367]
AscL3_XLOC_002460 (pp) IPECJ2_ENSSSCG00000006947	Inter	0.964835	1	2.53041e-08	18397.5	0.964835	Unknown	synapse defective Rho GTPase homolog 2 [Source:HGNC Symbol;Acc:HGNC:25841]
IPECJ2_ENSSSCG00000007160 (pp) IPECJ2_ENSSSCG00000020790	Intra	0.973626	1	1.97568e-06	24252.5	0.973626	DDRGK domain containing 1 [Source:HGNC Symbol;Acc:HGNC:16110]	Uncharacterized protein OS=Sus scrofa GN=MYEOV2 PE=1 SV=1
AscL3_XLOC_012561 (pp) IPECJ2_ENSSSCG00000015497	Inter	0.973626	-1	4.59028e-09	24252.5	-0.973626	Unknown	kelch like family member 20 [Source:HGNC Symbol;Acc:HGNC:25056]
IPECJ2_ENSSSCG00000007160 (pp) IPECJ2_ENSSSCG00000029161	Intra	0.969231	1	1.14652e-08	21732.5	0.969231	DDRGK domain containing 1 [Source:HGNC Symbol;Acc:HGNC:16110]	acireductone dioxygenase 1 [Source:HGNC Symbol;Acc:HGNC:30576]
AscL3_XLOC_012561 (pp) IPECJ2_ENSSSCG00000014204	Inter	0.96044	-1	5.08105e-08	14245.5	-0.96044	Unknown	decapping mRNA 2 [Source:HGNC Symbol;Acc:HGNC:24452]
IPECJ2_ENSSSCG00000007160 (pp) IPECJ2_ENSSSCG00000029830	Intra	0.969231	1	1.14652e-08	21732.5	0.969231	DDRGK domain containing 1 [Source:HGNC Symbol;Acc:HGNC:16110]	ribosomal protein L8 [Source:HGNC Symbol;Acc:HGNC:10368]
AscL3_XLOC_004258 (pp) IPECJ2_ENSSSCG00000003772	Inter	0.951648	-1	1.66161e-07	3309.5	-0.951648	Unknown	zinc finger ZZ-type containing 3 [Source:HGNC Symbol;Acc:HGNC:24523]
IPECJ2_ENSSSCG00000007160 (pp) IPECJ2_ENSSSCG00000012784	Intra	0.969231	1	3.28443e-06	21732.5	0.969231	DDRGK domain containing 1 [Source:HGNC Symbol;Acc:HGNC:16110]	signal sequence receptor subunit 4 [Source:HGNC Symbol;Acc:HGNC:11326]
AscL3_XLOC_004258 (pp) IPECJ2_ENSSSCG00000007672	Inter	0.951648	1	1.66161e-07	3309.5	0.951648	Unknown	POP7 homolog, ribonuclease P/MRP subunit [Source:HGNC Symbol;Acc:HGNC:19949]
AscL3_XLOC_016818 (pp) IPECJ2_ENSSSCG00000008600	Inter	0.956044	-1	9.46978e-08	9305.5	-0.956044	Unknown	pumilio RNA binding family member 2 [Source:HGNC Symbol;Acc:HGNC:14958]
IPECJ2_ENSSSCG00000029161 (pp) IPECJ2_ENSSSCG00000025928	Intra	0.982418	1	5.27924e-07	27446.5	0.982418	acireductone dioxygenase 1 [Source:HGNC Symbol;Acc:HGNC:30576]	ribosomal protein L18 [Source:HGNC Symbol;Acc:HGNC:10310]
IPECJ2_ENSSSCG00000007160 (pp) IPECJ2_ENSSSCG00000013267	Intra	0.964835	1	5.02606e-06	18397.5	0.964835	DDRGK domain containing 1 [Source:HGNC Symbol;Acc:HGNC:16110]	peroxisomal biogenesis factor 16 [Source:HGNC Symbol;Acc:HGNC:8857]
IPECJ2_ENSSSCG00000007160 (pp) IPECJ2_ENSSSCG00000024974	Intra	0.964835	1	5.02606e-06	18397.5	0.964835	DDRGK domain containing 1 [Source:HGNC Symbol;Acc:HGNC:16110]	ribosomal protein L13 [Source:HGNC Symbol;Acc:HGNC:10303]
AscL3_XLOC_017084 (pp) IPECJ2_ENSSSCG00000012624	Inter	0.982418	1	4.10718e-10	27446.5	0.982418	Unknown	solute carrier family 25 member 43 [Source:HGNC Symbol;Acc:HGNC:30557]
IPECJ2_ENSSSCG00000029161 (pp) IPECJ2_ENSSSCG00000027971	Intra	0.982418	1	4.10718e-10	27446.5	0.982418	acireductone dioxygenase 1 [Source:HGNC Symbol;Acc:HGNC:30576]	regulatory factor X associated ankyrin containing protein [Source:HGNC Symbol;Acc:HGNC:9987]
AscL3_XLOC_012561 (pp) IPECJ2_ENSSSCG00000026731	Inter	0.96044	-1	5.08105e-08	14245.5	-0.96044	Unknown	centrosomal protein 85 [Source:HGNC Symbol;Acc:HGNC:25309]
IPECJ2_ENSSSCG00000007160 (pp) IPECJ2_ENSSSCG00000007189	Intra	0.964835	1	5.02606e-06	18397.5	0.964835	DDRGK domain containing 1 [Source:HGNC Symbol;Acc:HGNC:16110]	syndecan binding protein 2 [Source:HGNC Symbol;Acc:HGNC:15756]
AscL3_XLOC_016818 (pp) IPECJ2_ENSSSCG00000024984	Inter	0.96044	1	5.08105e-08	14245.5	0.96044	Unknown	Unknown
IPECJ2_ENSSSCG00000007160 (pp) IPECJ2_ENSSSCG00000012965	Intra	0.964835	1	5.02606e-06	18397.5	0.964835	DDRGK domain containing 1 [Source:HGNC Symbol;Acc:HGNC:16110]	DR1 associated protein 1 [Source:HGNC Symbol;Acc:HGNC:3019]
AscL3_XLOC_021500 (pp) IPECJ2_ENSSSCG00000011213	Inter	0.982418	-1	4.10718e-10	27446.5	-0.982418	Unknown	topoisomerase (DNA) II beta 180kDa [Source:RefSeq peptide;Acc:NP_001245315]
IPECJ2_ENSSSCG00000029161 (pp) IPECJ2_ENSSSCG00000029362	Intra	0.978022	1	1.07614e-06	26153.5	0.978022	acireductone dioxygenase 1 [Source:HGNC Symbol;Acc:HGNC:30576]	charged multivesicular body protein 2A [Source:HGNC Symbol;Acc:HGNC:30216]
IPECJ2_ENSSSCG00000007160 (pp) IPECJ2_ENSSSCG00000007646	Intra	0.956044	1	1.04633e-05	9305.5	0.956044	DDRGK domain containing 1 [Source:HGNC Symbol;Acc:HGNC:16110]	late endosomal/lysosomal adaptor, MAPK and MTOR activator 4 [Source:HGNC Symbol;Acc:HGNC:33772]
AscL3_XLOC_021500 (pp) IPECJ2_ENSSSCG00000013402	Inter	0.964835	-1	2.53041e-08	18397.5	-0.964835	Unknown	Unknown
IPECJ2_ENSSSCG00000029161 (pp) IPECJ2_ENSSSCG00000020790	Intra	0.973626	1	1.97568e-06	24252.5	0.973626	acireductone dioxygenase 1 [Source:HGNC Symbol;Acc:HGNC:30576]	Uncharacterized protein OS=Sus scrofa GN=MYEOV2 PE=1 SV=1
AscL3_XLOC_017084 (pp) IPECJ2_ENSSSCG00000014114	Inter	0.951648	1	1.66161e-07	3309.5	0.951648	Unknown	poly(A) RNA polymerase D4, non-canonical [Source:HGNC Symbol;Acc:HGNC:26776]
IPECJ2_ENSSSCG00000029161 (pp) IPECJ2_ENSSSCG00000029034	Intra	0.982418	1	5.27924e-07	27446.5	0.982418	acireductone dioxygenase 1 [Source:HGNC Symbol;Acc:HGNC:30576]	cytochrome c oxidase subunit 4I1 [Source:HGNC Symbol;Acc:HGNC:2265]
IPECJ2_ENSSSCG00000007160 (pp) IPECJ2_ENSSSCG00000027840	Intra	0.964835	1	2.53041e-08	18397.5	0.964835	DDRGK domain containing 1 [Source:HGNC Symbol;Acc:HGNC:16110]	Unknown
AscL3_XLOC_019624 (pp) IPECJ2_ENSSSCG00000010160	Inter	0.969231	1	1.14652e-08	21732.5	0.969231	Probable tRNA-splicing endonuclease subunit sen54 OS=Schizosaccharomyces pombe (strain 972 / ATCC 24843) GN=sen54 PE=3 SV=1	TAR (HIV-1) RNA binding protein 1 [Source:HGNC Symbol;Acc:HGNC:11568]
IPECJ2_ENSSSCG00000029161 (pp) IPECJ2_ENSSSCG00000024974	Intra	0.978022	1	1.07614e-06	26153.5	0.978022	acireductone dioxygenase 1 [Source:HGNC Symbol;Acc:HGNC:30576]	ribosomal protein L13 [Source:HGNC Symbol;Acc:HGNC:10303]
IPECJ2_ENSSSCG00000007160 (pp) IPECJ2_ENSSSCG00000026812	Intra	0.96044	1	5.08105e-08	14245.5	0.96044	DDRGK domain containing 1 [Source:HGNC Symbol;Acc:HGNC:16110]	Unknown
AscL3_XLOC_021500 (pp) IPECJ2_ENSSSCG00000028378	Inter	0.951648	-1	1.66161e-07	3309.5	-0.951648	Unknown	Unknown
IPECJ2_ENSSSCG00000007160 (pp) IPECJ2_ENSSSCG00000012727	Intra	0.951648	-1	1.41528e-05	3309.5	-0.951648	DDRGK domain containing 1 [Source:HGNC Symbol;Acc:HGNC:16110]	fragile X mental retardation 1 [Source:HGNC Symbol;Acc:HGNC:3775]
IPECJ2_ENSSSCG00000029161 (pp) IPECJ2_ENSSSCG00000017705	Intra	0.964835	1	5.02606e-06	18397.5	0.964835	acireductone dioxygenase 1 [Source:HGNC Symbol;Acc:HGNC:30576]	C-C motif chemokine ligand 5 [Source:HGNC Symbol;Acc:HGNC:10632]
AscL3_XLOC_024104 (pp) AscL3_gene_GS_20549	Intra	0.969231	1	3.28443e-06	21732.5	0.969231	Organic solute transporter alpha-like protein OS=Ascaris suum PE=2 SV=1	Uncharacterized protein OS=Ascaris lumbricoides PE=4 SV=1
IPECJ2_ENSSSCG00000029161 (pp) IPECJ2_ENSSSCG00000019018	Intra	0.964835	1	5.02606e-06	18397.5	0.964835	acireductone dioxygenase 1 [Source:HGNC Symbol;Acc:HGNC:30576]	Unknown
IPECJ2_ENSSSCG00000007160 (pp) IPECJ2_ENSSSCG00000019018	Intra	0.951648	1	1.41528e-05	3309.5	0.951648	DDRGK domain containing 1 [Source:HGNC Symbol;Acc:HGNC:16110]	Unknown
AscL3_XLOC_021500 (pp) IPECJ2_ENSSSCG00000003464	Inter	0.956044	-1	9.46978e-08	9305.5	-0.956044	Unknown	DnaJ heat shock protein family (Hsp40) member C16 [Source:HGNC Symbol;Acc:HGNC:29157]
IPECJ2_ENSSSCG00000007160 (pp) IPECJ2_ENSSSCG00000012960	Intra	0.956044	1	9.46978e-08	9305.5	0.956044	DDRGK domain containing 1 [Source:HGNC Symbol;Acc:HGNC:16110]	cystatin E/M [Source:HGNC Symbol;Acc:HGNC:2478]
AscL3_XLOC_021500 (pp) IPECJ2_ENSSSCG00000023325	Inter	0.956044	1	9.46978e-08	9305.5	0.956044	Unknown	Aminoacylase-1 [Source:UniProtKB/Swiss-Prot;Acc:P37111]
IPECJ2_ENSSSCG00000007189 (pp) IPECJ2_ENSSSCG00000007472	Intra	0.969231	1	1.14652e-08	21732.5	0.969231	syndecan binding protein 2 [Source:HGNC Symbol;Acc:HGNC:15756]	breast carcinoma amplified sequence 4 [Source:HGNC Symbol;Acc:HGNC:14367]
IPECJ2_ENSSSCG00000029161 (pp) IPECJ2_ENSSSCG00000021825	Intra	0.951648	1	1.41528e-05	3309.5	0.951648	acireductone dioxygenase 1 [Source:HGNC Symbol;Acc:HGNC:30576]	40S ribosomal protein S21 [Source:UniProtKB/Swiss-Prot;Acc:P63221]
IPECJ2_ENSSSCG00000000061 (pp) IPECJ2_ENSSSCG00000026812	Intra	0.978022	1	1.07614e-06	26153.5	0.978022	phosphomannomutase 1 [Source:HGNC Symbol;Acc:HGNC:9114]	Unknown
IPECJ2_ENSSSCG00000007189 (pp) IPECJ2_ENSSSCG00000000061	Intra	0.964835	1	2.53041e-08	18397.5	0.964835	syndecan binding protein 2 [Source:HGNC Symbol;Acc:HGNC:15756]	phosphomannomutase 1 [Source:HGNC Symbol;Acc:HGNC:9114]
AscL3_XLOC_024104 (pp) IPECJ2_ENSSSCG00000012556	Inter	0.951648	-1	1.66161e-07	3309.5	-0.951648	Organic solute transporter alpha-like protein OS=Ascaris suum PE=2 SV=1	RNA binding motif protein 41 [Source:HGNC Symbol;Acc:HGNC:25617]
IPECJ2_ENSSSCG00000029161 (pp) IPECJ2_ENSSSCG00000026812	Intra	0.96044	1	7.40017e-06	14245.5	0.96044	acireductone dioxygenase 1 [Source:HGNC Symbol;Acc:HGNC:30576]	Unknown
IPECJ2_ENSSSCG00000029161 (pp) IPECJ2_XLOC_029898	Intra	0.96044	1	7.40017e-06	14245.5	0.96044	acireductone dioxygenase 1 [Source:HGNC Symbol;Acc:HGNC:30576]	Proteasome subunit beta type-7 OS=Sus scrofa GN=PSMB7 PE=2 SV=2
IPECJ2_ENSSSCG00000007189 (pp) IPECJ2_ENSSSCG00000027308	Intra	0.973626	1	4.59028e-09	24252.5	0.973626	syndecan binding protein 2 [Source:HGNC Symbol;Acc:HGNC:15756]	Unknown
IPECJ2_ENSSSCG00000000061 (pp) IPECJ2_ENSSSCG00000004970	Intra	0.973626	1	1.97568e-06	24252.5	0.973626	phosphomannomutase 1 [Source:HGNC Symbol;Acc:HGNC:9114]	Unknown
IPECJ2_ENSSSCG00000007189 (pp) IPECJ2_ENSSSCG00000013619	Intra	0.96044	1	5.08105e-08	14245.5	0.96044	syndecan binding protein 2 [Source:HGNC Symbol;Acc:HGNC:15756]	SWIM-type zinc finger 7 associated protein 1 [Source:HGNC Symbol;Acc:HGNC:26638]
IPECJ2_ENSSSCG00000000061 (pp) IPECJ2_ENSSSCG00000012784	Intra	0.973626	1	1.97568e-06	24252.5	0.973626	phosphomannomutase 1 [Source:HGNC Symbol;Acc:HGNC:9114]	signal sequence receptor subunit 4 [Source:HGNC Symbol;Acc:HGNC:11326]
IPECJ2_ENSSSCG00000000061 (pp) IPECJ2_ENSSSCG00000027353	Intra	0.978022	1	1.07614e-06	26153.5	0.978022	phosphomannomutase 1 [Source:HGNC Symbol;Acc:HGNC:9114]	Unknown
IPECJ2_ENSSSCG00000007189 (pp) IPECJ2_ENSSSCG00000027840	Intra	0.964835	1	2.53041e-08	18397.5	0.964835	syndecan binding protein 2 [Source:HGNC Symbol;Acc:HGNC:15756]	Unknown
IPECJ2_ENSSSCG00000000061 (pp) IPECJ2_ENSSSCG00000027971	Intra	0.978022	1	1.55196e-09	26153.5	0.978022	phosphomannomutase 1 [Source:HGNC Symbol;Acc:HGNC:9114]	regulatory factor X associated ankyrin containing protein [Source:HGNC Symbol;Acc:HGNC:9987]
IPECJ2_ENSSSCG00000007189 (pp) IPECJ2_ENSSSCG00000013267	Intra	0.96044	1	5.08105e-08	14245.5	0.96044	syndecan binding protein 2 [Source:HGNC Symbol;Acc:HGNC:15756]	peroxisomal biogenesis factor 16 [Source:HGNC Symbol;Acc:HGNC:8857]
IPECJ2_ENSSSCG00000000061 (pp) IPECJ2_ENSSSCG00000012965	Intra	0.969231	1	3.28443e-06	21732.5	0.969231	phosphomannomutase 1 [Source:HGNC Symbol;Acc:HGNC:9114]	DR1 associated protein 1 [Source:HGNC Symbol;Acc:HGNC:3019]
IPECJ2_ENSSSCG00000007189 (pp) IPECJ2_ENSSSCG00000029362	Intra	0.96044	1	5.08105e-08	14245.5	0.96044	syndecan binding protein 2 [Source:HGNC Symbol;Acc:HGNC:15756]	charged multivesicular body protein 2A [Source:HGNC Symbol;Acc:HGNC:30216]
IPECJ2_ENSSSCG00000000061 (pp) IPECJ2_ENSSSCG00000020817	Intra	0.969231	1	3.28443e-06	21732.5	0.969231	phosphomannomutase 1 [Source:HGNC Symbol;Acc:HGNC:9114]	40S ribosomal protein S16 [Source:UniProtKB/Swiss-Prot;Acc:Q29201]
IPECJ2_ENSSSCG00000007189 (pp) IPECJ2_ENSSSCG00000012960	Intra	0.956044	1	9.46978e-08	9305.5	0.956044	syndecan binding protein 2 [Source:HGNC Symbol;Acc:HGNC:15756]	cystatin E/M [Source:HGNC Symbol;Acc:HGNC:2478]
IPECJ2_ENSSSCG00000000061 (pp) IPECJ2_ENSSSCG00000020790	Intra	0.973626	1	1.97568e-06	24252.5	0.973626	phosphomannomutase 1 [Source:HGNC Symbol;Acc:HGNC:9114]	Uncharacterized protein OS=Sus scrofa GN=MYEOV2 PE=1 SV=1
IPECJ2_ENSSSCG00000007189 (pp) IPECJ2_ENSSSCG00000026914	Intra	0.96044	1	5.08105e-08	14245.5	0.96044	syndecan binding protein 2 [Source:HGNC Symbol;Acc:HGNC:15756]	phospholipase A2 group XVI [Source:HGNC Symbol;Acc:HGNC:17825]
IPECJ2_ENSSSCG00000000061 (pp) IPECJ2_ENSSSCG00000024974	Intra	0.973626	1	1.97568e-06	24252.5	0.973626	phosphomannomutase 1 [Source:HGNC Symbol;Acc:HGNC:9114]	ribosomal protein L13 [Source:HGNC Symbol;Acc:HGNC:10303]
IPECJ2_ENSSSCG00000007189 (pp) IPECJ2_ENSSSCG00000029161	Intra	0.96044	1	5.08105e-08	14245.5	0.96044	syndecan binding protein 2 [Source:HGNC Symbol;Acc:HGNC:15756]	acireductone dioxygenase 1 [Source:HGNC Symbol;Acc:HGNC:30576]
IPECJ2_ENSSSCG00000000061 (pp) IPECJ2_ENSSSCG00000001884	Intra	0.964835	1	5.02606e-06	18397.5	0.964835	phosphomannomutase 1 [Source:HGNC Symbol;Acc:HGNC:9114]	COMM domain containing 4 [Source:HGNC Symbol;Acc:HGNC:26027]
IPECJ2_ENSSSCG00000007189 (pp) IPECJ2_XLOC_007562	Intra	0.956044	1	9.46978e-08	9305.5	0.956044	syndecan binding protein 2 [Source:HGNC Symbol;Acc:HGNC:15756]	Unknown
IPECJ2_ENSSSCG00000000061 (pp) IPECJ2_ENSSSCG00000007160	Intra	0.964835	1	5.02606e-06	18397.5	0.964835	phosphomannomutase 1 [Source:HGNC Symbol;Acc:HGNC:9114]	DDRGK domain containing 1 [Source:HGNC Symbol;Acc:HGNC:16110]
IPECJ2_ENSSSCG00000007189 (pp) IPECJ2_ENSSSCG00000014177	Intra	0.951648	-1	1.66161e-07	3309.5	-0.951648	syndecan binding protein 2 [Source:HGNC Symbol;Acc:HGNC:15756]	chromodomain helicase DNA binding protein 1 [Source:HGNC Symbol;Acc:HGNC:1915]
IPECJ2_ENSSSCG00000000061 (pp) IPECJ2_ENSSSCG00000029362	Intra	0.969231	1	1.14652e-08	21732.5	0.969231	phosphomannomutase 1 [Source:HGNC Symbol;Acc:HGNC:9114]	charged multivesicular body protein 2A [Source:HGNC Symbol;Acc:HGNC:30216]
IPECJ2_ENSSSCG00000007189 (pp) IPECJ2_ENSSSCG00000025928	Intra	0.956044	1	9.46978e-08	9305.5	0.956044	syndecan binding protein 2 [Source:HGNC Symbol;Acc:HGNC:15756]	ribosomal protein L18 [Source:HGNC Symbol;Acc:HGNC:10310]
IPECJ2_ENSSSCG00000007189 (pp) IPECJ2_ENSSSCG00000029034	Intra	0.956044	1	9.46978e-08	9305.5	0.956044	syndecan binding protein 2 [Source:HGNC Symbol;Acc:HGNC:15756]	cytochrome c oxidase subunit 4I1 [Source:HGNC Symbol;Acc:HGNC:2265]
IPECJ2_ENSSSCG00000023325 (pp) IPECJ2_ENSSSCG00000024254	Intra	0.986813	1	7.37952e-11	28223.5	0.986813	Aminoacylase-1 [Source:UniProtKB/Swiss-Prot;Acc:P37111]	alkB homolog 7 [Source:HGNC Symbol;Acc:HGNC:21306]
IPECJ2_ENSSSCG00000000061 (pp) IPECJ2_ENSSSCG00000019018	Intra	0.964835	1	5.02606e-06	18397.5	0.964835	phosphomannomutase 1 [Source:HGNC Symbol;Acc:HGNC:9114]	Unknown
IPECJ2_ENSSSCG00000023325 (pp) IPECJ2_ENSSSCG00000013267	Intra	0.978022	1	1.55196e-09	26153.5	0.978022	Aminoacylase-1 [Source:UniProtKB/Swiss-Prot;Acc:P37111]	peroxisomal biogenesis factor 16 [Source:HGNC Symbol;Acc:HGNC:8857]
IPECJ2_ENSSSCG00000000061 (pp) IPECJ2_ENSSSCG00000010063	Intra	0.96044	1	5.08105e-08	14245.5	0.96044	phosphomannomutase 1 [Source:HGNC Symbol;Acc:HGNC:9114]	Macrophage migration inhibitory factor OS=Sus scrofa GN=MIF PE=1 SV=3
IPECJ2_ENSSSCG00000000061 (pp) IPECJ2_ENSSSCG00000007646	Intra	0.964835	1	5.02606e-06	18397.5	0.964835	phosphomannomutase 1 [Source:HGNC Symbol;Acc:HGNC:9114]	late endosomal/lysosomal adaptor, MAPK and MTOR activator 4 [Source:HGNC Symbol;Acc:HGNC:33772]
IPECJ2_ENSSSCG00000007189 (pp) IPECJ2_ENSSSCG00000029830	Intra	0.951648	1	1.66161e-07	3309.5	0.951648	syndecan binding protein 2 [Source:HGNC Symbol;Acc:HGNC:15756]	ribosomal protein L8 [Source:HGNC Symbol;Acc:HGNC:10368]
IPECJ2_ENSSSCG00000015497 (pp) IPECJ2_ENSSSCG00000017673	Intra	0.96044	1	5.08105e-08	14245.5	0.96044	kelch like family member 20 [Source:HGNC Symbol;Acc:HGNC:25056]	integrator complex subunit 2 [Source:HGNC Symbol;Acc:HGNC:29241]
IPECJ2_ENSSSCG00000015497 (pp) IPECJ2_XLOC_029191	Intra	0.951648	1	1.66161e-07	3309.5	0.951648	kelch like family member 20 [Source:HGNC Symbol;Acc:HGNC:25056]	Unknown
IPECJ2_ENSSSCG00000023325 (pp) IPECJ2_ENSSSCG00000006777	Intra	0.986813	1	7.37952e-11	28223.5	0.986813	Aminoacylase-1 [Source:UniProtKB/Swiss-Prot;Acc:P37111]	ras homolog family member C [Source:HGNC Symbol;Acc:HGNC:669]
IPECJ2_ENSSSCG00000023325 (pp) IPECJ2_ENSSSCG00000025868	Intra	0.969231	1	1.14652e-08	21732.5	0.969231	Aminoacylase-1 [Source:UniProtKB/Swiss-Prot;Acc:P37111]	Unknown
IPECJ2_ENSSSCG00000023325 (pp) IPECJ2_ENSSSCG00000027308	Intra	0.969231	1	1.14652e-08	21732.5	0.969231	Aminoacylase-1 [Source:UniProtKB/Swiss-Prot;Acc:P37111]	Unknown
IPECJ2_ENSSSCG00000000061 (pp) IPECJ2_ENSSSCG00000025928	Intra	0.96044	1	7.40017e-06	14245.5	0.96044	phosphomannomutase 1 [Source:HGNC Symbol;Acc:HGNC:9114]	ribosomal protein L18 [Source:HGNC Symbol;Acc:HGNC:10310]
IPECJ2_ENSSSCG00000023325 (pp) IPECJ2_ENSSSCG00000022647	Intra	0.978022	1	1.55196e-09	26153.5	0.978022	Aminoacylase-1 [Source:UniProtKB/Swiss-Prot;Acc:P37111]	translocase of inner mitochondrial membrane 17 homolog B (yeast) [Source:HGNC Symbol;Acc:HGNC:17310]
IPECJ2_ENSSSCG00000000061 (pp) IPECJ2_ENSSSCG00000012842	Intra	0.96044	1	7.40017e-06	14245.5	0.96044	phosphomannomutase 1 [Source:HGNC Symbol;Acc:HGNC:9114]	Unknown
IPECJ2_ENSSSCG00000023325 (pp) IPECJ2_ENSSSCG00000007472	Intra	0.969231	1	1.14652e-08	21732.5	0.969231	Aminoacylase-1 [Source:UniProtKB/Swiss-Prot;Acc:P37111]	breast carcinoma amplified sequence 4 [Source:HGNC Symbol;Acc:HGNC:14367]
IPECJ2_ENSSSCG00000023325 (pp) IPECJ2_ENSSSCG00000001884	Intra	0.964835	1	2.53041e-08	18397.5	0.964835	Aminoacylase-1 [Source:UniProtKB/Swiss-Prot;Acc:P37111]	COMM domain containing 4 [Source:HGNC Symbol;Acc:HGNC:26027]
IPECJ2_ENSSSCG00000029362 (pp) IPECJ2_ENSSSCG00000024974	Intra	0.978022	1	1.07614e-06	26153.5	0.978022	charged multivesicular body protein 2A [Source:HGNC Symbol;Acc:HGNC:30216]	ribosomal protein L13 [Source:HGNC Symbol;Acc:HGNC:10303]
IPECJ2_ENSSSCG00000023325 (pp) IPECJ2_ENSSSCG00000009479	Intra	0.964835	-1	5.02606e-06	18397.5	-0.964835	Aminoacylase-1 [Source:UniProtKB/Swiss-Prot;Acc:P37111]	RNA binding motif protein 26 [Source:HGNC Symbol;Acc:HGNC:20327]
IPECJ2_ENSSSCG00000029362 (pp) IPECJ2_ENSSSCG00000026812	Intra	0.973626	1	1.97568e-06	24252.5	0.973626	charged multivesicular body protein 2A [Source:HGNC Symbol;Acc:HGNC:30216]	Unknown
IPECJ2_ENSSSCG00000023325 (pp) IPECJ2_ENSSSCG00000027827	Intra	0.969231	1	1.14652e-08	21732.5	0.969231	Aminoacylase-1 [Source:UniProtKB/Swiss-Prot;Acc:P37111]	UDP-galactose-4-epimerase [Source:HGNC Symbol;Acc:HGNC:4116]
IPECJ2_ENSSSCG00000000061 (pp) IPECJ2_ENSSSCG00000029034	Intra	0.96044	1	7.40017e-06	14245.5	0.96044	phosphomannomutase 1 [Source:HGNC Symbol;Acc:HGNC:9114]	cytochrome c oxidase subunit 4I1 [Source:HGNC Symbol;Acc:HGNC:2265]
IPECJ2_ENSSSCG00000000061 (pp) IPECJ2_XLOC_029898	Intra	0.96044	1	7.40017e-06	14245.5	0.96044	phosphomannomutase 1 [Source:HGNC Symbol;Acc:HGNC:9114]	Proteasome subunit beta type-7 OS=Sus scrofa GN=PSMB7 PE=2 SV=2
IPECJ2_ENSSSCG00000023325 (pp) IPECJ2_ENSSSCG00000027840	Intra	0.969231	1	1.14652e-08	21732.5	0.969231	Aminoacylase-1 [Source:UniProtKB/Swiss-Prot;Acc:P37111]	Unknown
IPECJ2_ENSSSCG00000023325 (pp) IPECJ2_ENSSSCG00000001423	Intra	0.96044	1	5.08105e-08	14245.5	0.96044	Aminoacylase-1 [Source:UniProtKB/Swiss-Prot;Acc:P37111]	negative elongation factor complex member E [Source:HGNC Symbol;Acc:HGNC:13974]
IPECJ2_ENSSSCG00000029362 (pp) IPECJ2_ENSSSCG00000027353	Intra	0.969231	1	3.28443e-06	21732.5	0.969231	charged multivesicular body protein 2A [Source:HGNC Symbol;Acc:HGNC:30216]	Unknown
IPECJ2_ENSSSCG00000029362 (pp) IPECJ2_XLOC_029898	Intra	0.964835	1	5.02606e-06	18397.5	0.964835	charged multivesicular body protein 2A [Source:HGNC Symbol;Acc:HGNC:30216]	Proteasome subunit beta type-7 OS=Sus scrofa GN=PSMB7 PE=2 SV=2
IPECJ2_ENSSSCG00000023325 (pp) IPECJ2_ENSSSCG00000013619	Intra	0.96044	1	5.08105e-08	14245.5	0.96044	Aminoacylase-1 [Source:UniProtKB/Swiss-Prot;Acc:P37111]	SWIM-type zinc finger 7 associated protein 1 [Source:HGNC Symbol;Acc:HGNC:26638]
IPECJ2_ENSSSCG00000023325 (pp) IPECJ2_ENSSSCG00000025928	Intra	0.964835	1	2.53041e-08	18397.5	0.964835	Aminoacylase-1 [Source:UniProtKB/Swiss-Prot;Acc:P37111]	ribosomal protein L18 [Source:HGNC Symbol;Acc:HGNC:10310]
IPECJ2_ENSSSCG00000000061 (pp) IPECJ2_ENSSSCG00000007472	Intra	0.956044	1	1.04633e-05	9305.5	0.956044	phosphomannomutase 1 [Source:HGNC Symbol;Acc:HGNC:9114]	breast carcinoma amplified sequence 4 [Source:HGNC Symbol;Acc:HGNC:14367]
IPECJ2_ENSSSCG00000023325 (pp) IPECJ2_ENSSSCG00000029034	Intra	0.964835	1	2.53041e-08	18397.5	0.964835	Aminoacylase-1 [Source:UniProtKB/Swiss-Prot;Acc:P37111]	cytochrome c oxidase subunit 4I1 [Source:HGNC Symbol;Acc:HGNC:2265]
IPECJ2_ENSSSCG00000029362 (pp) IPECJ2_ENSSSCG00000019018	Intra	0.969231	1	3.28443e-06	21732.5	0.969231	charged multivesicular body protein 2A [Source:HGNC Symbol;Acc:HGNC:30216]	Unknown
IPECJ2_ENSSSCG00000029362 (pp) IPECJ2_ENSSSCG00000021825	Intra	0.956044	1	1.04633e-05	9305.5	0.956044	charged multivesicular body protein 2A [Source:HGNC Symbol;Acc:HGNC:30216]	40S ribosomal protein S21 [Source:UniProtKB/Swiss-Prot;Acc:P63221]
IPECJ2_ENSSSCG00000023325 (pp) IPECJ2_ENSSSCG00000015786	Intra	0.951648	-1	1.41528e-05	3309.5	-0.951648	Aminoacylase-1 [Source:UniProtKB/Swiss-Prot;Acc:P37111]	Unknown
IPECJ2_ENSSSCG00000000061 (pp) IPECJ2_ENSSSCG00000006777	Intra	0.951648	1	1.41528e-05	3309.5	0.951648	phosphomannomutase 1 [Source:HGNC Symbol;Acc:HGNC:9114]	ras homolog family member C [Source:HGNC Symbol;Acc:HGNC:669]
IPECJ2_ENSSSCG00000023325 (pp) IPECJ2_ENSSSCG00000029830	Intra	0.96044	1	5.08105e-08	14245.5	0.96044	Aminoacylase-1 [Source:UniProtKB/Swiss-Prot;Acc:P37111]	ribosomal protein L8 [Source:HGNC Symbol;Acc:HGNC:10368]
IPECJ2_ENSSSCG00000023325 (pp) IPECJ2_ENSSSCG00000007189	Intra	0.956044	1	1.04633e-05	9305.5	0.956044	Aminoacylase-1 [Source:UniProtKB/Swiss-Prot;Acc:P37111]	syndecan binding protein 2 [Source:HGNC Symbol;Acc:HGNC:15756]
IPECJ2_ENSSSCG00000000061 (pp) IPECJ2_ENSSSCG00000029161	Intra	0.956044	1	9.46978e-08	9305.5	0.956044	phosphomannomutase 1 [Source:HGNC Symbol;Acc:HGNC:9114]	acireductone dioxygenase 1 [Source:HGNC Symbol;Acc:HGNC:30576]
IPECJ2_ENSSSCG00000023334 (pp) AscL3_gene_L3E_01572	Inter	0.951648	1	1.41528e-05	3309.5	0.951648	Uncharacterized protein OS=Sus scrofa GN=CXorf23 PE=4 SV=1	Bm1034 OS=Brugia malayi GN=Bm1034 PE=4 SV=1
IPECJ2_ENSSSCG00000023334 (pp) IPECJ2_ENSSSCG00000010239	Intra	0.951648	1	1.41528e-05	3309.5	0.951648	Uncharacterized protein OS=Sus scrofa GN=CXorf23 PE=4 SV=1	RUN and FYVE domain containing 2 [Source:HGNC Symbol;Acc:HGNC:19761]
IPECJ2_ENSSSCG00000000061 (pp) IPECJ2_ENSSSCG00000013267	Intra	0.951648	1	1.41528e-05	3309.5	0.951648	phosphomannomutase 1 [Source:HGNC Symbol;Acc:HGNC:9114]	peroxisomal biogenesis factor 16 [Source:HGNC Symbol;Acc:HGNC:8857]
IPECJ2_ENSSSCG00000023325 (pp) IPECJ2_ENSSSCG00000029161	Intra	0.951648	1	1.66161e-07	3309.5	0.951648	Aminoacylase-1 [Source:UniProtKB/Swiss-Prot;Acc:P37111]	acireductone dioxygenase 1 [Source:HGNC Symbol;Acc:HGNC:30576]
IPECJ2_ENSSSCG00000000061 (pp) IPECJ2_ENSSSCG00000007331	Intra	0.951648	-1	1.66161e-07	3309.5	-0.951648	phosphomannomutase 1 [Source:HGNC Symbol;Acc:HGNC:9114]	RB transcriptional corepressor like 1 [Source:HGNC Symbol;Acc:HGNC:9893]
IPECJ2_ENSSSCG00000023334 (pp) IPECJ2_ENSSSCG00000016835	Intra	0.969231	1	3.28443e-06	21732.5	0.969231	Uncharacterized protein OS=Sus scrofa GN=CXorf23 PE=4 SV=1	S-phase kinase-associated protein 2, E3 ubiquitin protein ligase [Source:HGNC Symbol;Acc:HGNC:10901]
IPECJ2_ENSSSCG00000000061 (pp) IPECJ2_ENSSSCG00000010865	Intra	0.951648	-1	1.41528e-05	3309.5	-0.951648	phosphomannomutase 1 [Source:HGNC Symbol;Acc:HGNC:9114]	exonuclease 1 [Source:HGNC Symbol;Acc:HGNC:3511]
IPECJ2_ENSSSCG00000000061 (pp) IPECJ2_ENSSSCG00000017705	Intra	0.951648	1	1.41528e-05	3309.5	0.951648	phosphomannomutase 1 [Source:HGNC Symbol;Acc:HGNC:9114]	C-C motif chemokine ligand 5 [Source:HGNC Symbol;Acc:HGNC:10632]
IPECJ2_ENSSSCG00000000061 (pp) IPECJ2_ENSSSCG00000021825	Intra	0.951648	1	1.41528e-05	3309.5	0.951648	phosphomannomutase 1 [Source:HGNC Symbol;Acc:HGNC:9114]	40S ribosomal protein S21 [Source:UniProtKB/Swiss-Prot;Acc:P63221]
IPECJ2_ENSSSCG00000023467 (pp) IPECJ2_ENSSSCG00000011862	Intra	0.964835	1	2.53041e-08	18397.5	0.964835	Unknown	mucin-13 [Source:RefSeq peptide;Acc:NP_001098763]
IPECJ2_ENSSSCG00000007281 (pp) IPECJ2_ENSSSCG00000023325	Intra	0.982418	1	4.10718e-10	27446.5	0.982418	microtubule associated protein 1 light chain 3 alpha [Source:HGNC Symbol;Acc:HGNC:6838]	Aminoacylase-1 [Source:UniProtKB/Swiss-Prot;Acc:P37111]
IPECJ2_ENSSSCG00000007281 (pp) IPECJ2_ENSSSCG00000029855	Intra	0.982418	1	4.10718e-10	27446.5	0.982418	microtubule associated protein 1 light chain 3 alpha [Source:HGNC Symbol;Acc:HGNC:6838]	lipoma HMGIC fusion partner [Source:HGNC Symbol;Acc:HGNC:6586]
IPECJ2_ENSSSCG00000007281 (pp) IPECJ2_ENSSSCG00000006777	Intra	0.982418	1	4.10718e-10	27446.5	0.982418	microtubule associated protein 1 light chain 3 alpha [Source:HGNC Symbol;Acc:HGNC:6838]	ras homolog family member C [Source:HGNC Symbol;Acc:HGNC:669]
IPECJ2_ENSSSCG00000007281 (pp) IPECJ2_ENSSSCG00000013619	Intra	0.969231	1	1.14652e-08	21732.5	0.969231	microtubule associated protein 1 light chain 3 alpha [Source:HGNC Symbol;Acc:HGNC:6838]	SWIM-type zinc finger 7 associated protein 1 [Source:HGNC Symbol;Acc:HGNC:26638]
IPECJ2_ENSSSCG00000007281 (pp) IPECJ2_ENSSSCG00000027308	Intra	0.969231	1	1.14652e-08	21732.5	0.969231	microtubule associated protein 1 light chain 3 alpha [Source:HGNC Symbol;Acc:HGNC:6838]	Unknown
IPECJ2_ENSSSCG00000007281 (pp) IPECJ2_ENSSSCG00000024254	Intra	0.978022	1	1.55196e-09	26153.5	0.978022	microtubule associated protein 1 light chain 3 alpha [Source:HGNC Symbol;Acc:HGNC:6838]	alkB homolog 7 [Source:HGNC Symbol;Acc:HGNC:21306]
IPECJ2_ENSSSCG00000007281 (pp) IPECJ2_ENSSSCG00000007189	Intra	0.973626	1	4.59028e-09	24252.5	0.973626	microtubule associated protein 1 light chain 3 alpha [Source:HGNC Symbol;Acc:HGNC:6838]	syndecan binding protein 2 [Source:HGNC Symbol;Acc:HGNC:15756]
IPECJ2_ENSSSCG00000007281 (pp) IPECJ2_ENSSSCG00000007472	Intra	0.96044	1	5.08105e-08	14245.5	0.96044	microtubule associated protein 1 light chain 3 alpha [Source:HGNC Symbol;Acc:HGNC:6838]	breast carcinoma amplified sequence 4 [Source:HGNC Symbol;Acc:HGNC:14367]
IPECJ2_ENSSSCG00000007281 (pp) IPECJ2_ENSSSCG00000022647	Intra	0.96044	1	5.08105e-08	14245.5	0.96044	microtubule associated protein 1 light chain 3 alpha [Source:HGNC Symbol;Acc:HGNC:6838]	translocase of inner mitochondrial membrane 17 homolog B (yeast) [Source:HGNC Symbol;Acc:HGNC:17310]
IPECJ2_ENSSSCG00000007281 (pp) IPECJ2_ENSSSCG00000013267	Intra	0.964835	1	2.53041e-08	18397.5	0.964835	microtubule associated protein 1 light chain 3 alpha [Source:HGNC Symbol;Acc:HGNC:6838]	peroxisomal biogenesis factor 16 [Source:HGNC Symbol;Acc:HGNC:8857]
IPECJ2_ENSSSCG00000007281 (pp) IPECJ2_ENSSSCG00000027840	Intra	0.964835	1	2.53041e-08	18397.5	0.964835	microtubule associated protein 1 light chain 3 alpha [Source:HGNC Symbol;Acc:HGNC:6838]	Unknown
IPECJ2_ENSSSCG00000010865 (pp) IPECJ2_XLOC_029898	Intra	0.978022	-1	1.07614e-06	26153.5	-0.978022	exonuclease 1 [Source:HGNC Symbol;Acc:HGNC:3511]	Proteasome subunit beta type-7 OS=Sus scrofa GN=PSMB7 PE=2 SV=2
IPECJ2_ENSSSCG00000007281 (pp) IPECJ2_ENSSSCG00000001884	Intra	0.951648	1	1.66161e-07	3309.5	0.951648	microtubule associated protein 1 light chain 3 alpha [Source:HGNC Symbol;Acc:HGNC:6838]	COMM domain containing 4 [Source:HGNC Symbol;Acc:HGNC:26027]
IPECJ2_ENSSSCG00000010865 (pp) IPECJ2_ENSSSCG00000007646	Intra	0.973626	-1	1.97568e-06	24252.5	-0.973626	exonuclease 1 [Source:HGNC Symbol;Acc:HGNC:3511]	late endosomal/lysosomal adaptor, MAPK and MTOR activator 4 [Source:HGNC Symbol;Acc:HGNC:33772]
IPECJ2_ENSSSCG00000007281 (pp) IPECJ2_ENSSSCG00000014177	Intra	0.951648	-1	1.66161e-07	3309.5	-0.951648	microtubule associated protein 1 light chain 3 alpha [Source:HGNC Symbol;Acc:HGNC:6838]	chromodomain helicase DNA binding protein 1 [Source:HGNC Symbol;Acc:HGNC:1915]
IPECJ2_ENSSSCG00000007281 (pp) IPECJ2_ENSSSCG00000025928	Intra	0.956044	1	9.46978e-08	9305.5	0.956044	microtubule associated protein 1 light chain 3 alpha [Source:HGNC Symbol;Acc:HGNC:6838]	ribosomal protein L18 [Source:HGNC Symbol;Acc:HGNC:10310]
IPECJ2_ENSSSCG00000007281 (pp) IPECJ2_ENSSSCG00000029034	Intra	0.956044	1	9.46978e-08	9305.5	0.956044	microtubule associated protein 1 light chain 3 alpha [Source:HGNC Symbol;Acc:HGNC:6838]	cytochrome c oxidase subunit 4I1 [Source:HGNC Symbol;Acc:HGNC:2265]
IPECJ2_ENSSSCG00000010865 (pp) IPECJ2_ENSSSCG00000027353	Intra	0.978022	-1	1.07614e-06	26153.5	-0.978022	exonuclease 1 [Source:HGNC Symbol;Acc:HGNC:3511]	Unknown
IPECJ2_ENSSSCG00000007281 (pp) IPECJ2_XLOC_007562	Intra	0.951648	1	1.66161e-07	3309.5	0.951648	microtubule associated protein 1 light chain 3 alpha [Source:HGNC Symbol;Acc:HGNC:6838]	Unknown
IPECJ2_ENSSSCG00000010865 (pp) IPECJ2_ENSSSCG00000019018	Intra	0.973626	-1	1.97568e-06	24252.5	-0.973626	exonuclease 1 [Source:HGNC Symbol;Acc:HGNC:3511]	Unknown
IPECJ2_ENSSSCG00000007281 (pp) IPECJ2_ENSSSCG00000026914	Intra	0.951648	1	1.66161e-07	3309.5	0.951648	microtubule associated protein 1 light chain 3 alpha [Source:HGNC Symbol;Acc:HGNC:6838]	phospholipase A2 group XVI [Source:HGNC Symbol;Acc:HGNC:17825]
IPECJ2_ENSSSCG00000010865 (pp) IPECJ2_ENSSSCG00000021825	Intra	0.973626	-1	1.97568e-06	24252.5	-0.973626	exonuclease 1 [Source:HGNC Symbol;Acc:HGNC:3511]	40S ribosomal protein S21 [Source:UniProtKB/Swiss-Prot;Acc:P63221]
IPECJ2_ENSSSCG00000007281 (pp) IPECJ2_ENSSSCG00000027827	Intra	0.951648	1	1.66161e-07	3309.5	0.951648	microtubule associated protein 1 light chain 3 alpha [Source:HGNC Symbol;Acc:HGNC:6838]	UDP-galactose-4-epimerase [Source:HGNC Symbol;Acc:HGNC:4116]
IPECJ2_ENSSSCG00000010865 (pp) IPECJ2_ENSSSCG00000010063	Intra	0.969231	-1	1.14652e-08	21732.5	-0.969231	exonuclease 1 [Source:HGNC Symbol;Acc:HGNC:3511]	Macrophage migration inhibitory factor OS=Sus scrofa GN=MIF PE=1 SV=3
IPECJ2_ENSSSCG00000010865 (pp) IPECJ2_ENSSSCG00000017308	Intra	0.969231	1	1.14652e-08	21732.5	0.969231	exonuclease 1 [Source:HGNC Symbol;Acc:HGNC:3511]	cell division cycle 27 [Source:HGNC Symbol;Acc:HGNC:1728]
IPECJ2_ENSSSCG00000010865 (pp) IPECJ2_ENSSSCG00000020790	Intra	0.964835	-1	5.02606e-06	18397.5	-0.964835	exonuclease 1 [Source:HGNC Symbol;Acc:HGNC:3511]	Uncharacterized protein OS=Sus scrofa GN=MYEOV2 PE=1 SV=1
IPECJ2_ENSSSCG00000010865 (pp) IPECJ2_ENSSSCG00000010631	Intra	0.964835	1	2.53041e-08	18397.5	0.964835	exonuclease 1 [Source:HGNC Symbol;Acc:HGNC:3511]	glycerol-3-phosphate acyltransferase, mitochondrial [Source:HGNC Symbol;Acc:HGNC:24865]
IPECJ2_ENSSSCG00000010865 (pp) IPECJ2_XLOC_011183	Intra	0.964835	-1	5.02606e-06	18397.5	-0.964835	exonuclease 1 [Source:HGNC Symbol;Acc:HGNC:3511]	Inosine triphosphate pyrophosphatase OS=Bos taurus GN=ITPA PE=2 SV=1
IPECJ2_ENSSSCG00000010865 (pp) IPECJ2_ENSSSCG00000012784	Intra	0.96044	-1	7.40017e-06	14245.5	-0.96044	exonuclease 1 [Source:HGNC Symbol;Acc:HGNC:3511]	signal sequence receptor subunit 4 [Source:HGNC Symbol;Acc:HGNC:11326]
IPECJ2_ENSSSCG00000010865 (pp) IPECJ2_ENSSSCG00000024974	Intra	0.96044	-1	7.40017e-06	14245.5	-0.96044	exonuclease 1 [Source:HGNC Symbol;Acc:HGNC:3511]	ribosomal protein L13 [Source:HGNC Symbol;Acc:HGNC:10303]
IPECJ2_ENSSSCG00000010865 (pp) IPECJ2_ENSSSCG00000026812	Intra	0.96044	-1	7.40017e-06	14245.5	-0.96044	exonuclease 1 [Source:HGNC Symbol;Acc:HGNC:3511]	Unknown
IPECJ2_ENSSSCG00000010865 (pp) IPECJ2_ENSSSCG00000001922	Intra	0.956044	1	1.04633e-05	9305.5	0.956044	exonuclease 1 [Source:HGNC Symbol;Acc:HGNC:3511]	ariadne RBR E3 ubiquitin protein ligase 1 [Source:HGNC Symbol;Acc:HGNC:689]
IPECJ2_ENSSSCG00000010865 (pp) IPECJ2_ENSSSCG00000017705	Intra	0.956044	-1	1.04633e-05	9305.5	-0.956044	exonuclease 1 [Source:HGNC Symbol;Acc:HGNC:3511]	C-C motif chemokine ligand 5 [Source:HGNC Symbol;Acc:HGNC:10632]
IPECJ2_ENSSSCG00000010865 (pp) IPECJ2_ENSSSCG00000014076	Intra	0.956044	1	1.04633e-05	9305.5	0.956044	exonuclease 1 [Source:HGNC Symbol;Acc:HGNC:3511]	Isoform 2 of Soluble lamin-associated protein of 75 kDa OS=Homo sapiens GN=FAM169A
IPECJ2_ENSSSCG00000000167 (pp) IPECJ2_ENSSSCG00000022801	Intra	0.964835	1	5.02606e-06	18397.5	0.964835	RIC8 guanine nucleotide exchange factor B [Source:HGNC Symbol;Acc:HGNC:25555]	S100P binding protein [Source:HGNC Symbol;Acc:HGNC:25768]
IPECJ2_ENSSSCG00000010865 (pp) IPECJ2_ENSSSCG00000020817	Intra	0.956044	-1	1.04633e-05	9305.5	-0.956044	exonuclease 1 [Source:HGNC Symbol;Acc:HGNC:3511]	40S ribosomal protein S16 [Source:UniProtKB/Swiss-Prot;Acc:Q29201]
IPECJ2_ENSSSCG00000000167 (pp) IPECJ2_XLOC_029191	Intra	0.964835	1	2.53041e-08	18397.5	0.964835	RIC8 guanine nucleotide exchange factor B [Source:HGNC Symbol;Acc:HGNC:25555]	Unknown
IPECJ2_ENSSSCG00000010865 (pp) IPECJ2_ENSSSCG00000027971	Intra	0.956044	-1	9.46978e-08	9305.5	-0.956044	exonuclease 1 [Source:HGNC Symbol;Acc:HGNC:3511]	regulatory factor X associated ankyrin containing protein [Source:HGNC Symbol;Acc:HGNC:9987]
IPECJ2_ENSSSCG00000010865 (pp) IPECJ2_ENSSSCG00000012965	Intra	0.951648	-1	1.41528e-05	3309.5	-0.951648	exonuclease 1 [Source:HGNC Symbol;Acc:HGNC:3511]	DR1 associated protein 1 [Source:HGNC Symbol;Acc:HGNC:3019]
IPECJ2_ENSSSCG00000007331 (pp) IPECJ2_ENSSSCG00000027353	Intra	0.973626	-1	1.97568e-06	24252.5	-0.973626	RB transcriptional corepressor like 1 [Source:HGNC Symbol;Acc:HGNC:9893]	Unknown
IPECJ2_ENSSSCG00000007331 (pp) IPECJ2_ENSSSCG00000024180	Intra	0.978022	1	1.07614e-06	26153.5	0.978022	RB transcriptional corepressor like 1 [Source:HGNC Symbol;Acc:HGNC:9893]	peripherial benzodiazepine receptor associated protein [Source:RefSeq peptide;Acc:NP_001009581]
IPECJ2_ENSSSCG00000007331 (pp) IPECJ2_ENSSSCG00000010865	Intra	0.969231	1	3.28443e-06	21732.5	0.969231	RB transcriptional corepressor like 1 [Source:HGNC Symbol;Acc:HGNC:9893]	exonuclease 1 [Source:HGNC Symbol;Acc:HGNC:3511]
IPECJ2_ENSSSCG00000007331 (pp) IPECJ2_ENSSSCG00000019018	Intra	0.964835	-1	5.02606e-06	18397.5	-0.964835	RB transcriptional corepressor like 1 [Source:HGNC Symbol;Acc:HGNC:9893]	Unknown
IPECJ2_ENSSSCG00000007331 (pp) IPECJ2_ENSSSCG00000017308	Intra	0.96044	1	7.40017e-06	14245.5	0.96044	RB transcriptional corepressor like 1 [Source:HGNC Symbol;Acc:HGNC:9893]	cell division cycle 27 [Source:HGNC Symbol;Acc:HGNC:1728]
IPECJ2_ENSSSCG00000007331 (pp) IPECJ2_ENSSSCG00000024974	Intra	0.96044	-1	7.40017e-06	14245.5	-0.96044	RB transcriptional corepressor like 1 [Source:HGNC Symbol;Acc:HGNC:9893]	ribosomal protein L13 [Source:HGNC Symbol;Acc:HGNC:10303]
IPECJ2_ENSSSCG00000007331 (pp) IPECJ2_ENSSSCG00000014076	Intra	0.96044	1	7.40017e-06	14245.5	0.96044	RB transcriptional corepressor like 1 [Source:HGNC Symbol;Acc:HGNC:9893]	Isoform 2 of Soluble lamin-associated protein of 75 kDa OS=Homo sapiens GN=FAM169A
IPECJ2_ENSSSCG00000007331 (pp) IPECJ2_XLOC_029898	Intra	0.96044	-1	7.40017e-06	14245.5	-0.96044	RB transcriptional corepressor like 1 [Source:HGNC Symbol;Acc:HGNC:9893]	Proteasome subunit beta type-7 OS=Sus scrofa GN=PSMB7 PE=2 SV=2
IPECJ2_ENSSSCG00000007331 (pp) IPECJ2_ENSSSCG00000001922	Intra	0.956044	1	1.04633e-05	9305.5	0.956044	RB transcriptional corepressor like 1 [Source:HGNC Symbol;Acc:HGNC:9893]	ariadne RBR E3 ubiquitin protein ligase 1 [Source:HGNC Symbol;Acc:HGNC:689]
IPECJ2_ENSSSCG00000007331 (pp) IPECJ2_ENSSSCG00000020790	Intra	0.956044	-1	1.04633e-05	9305.5	-0.956044	RB transcriptional corepressor like 1 [Source:HGNC Symbol;Acc:HGNC:9893]	Uncharacterized protein OS=Sus scrofa GN=MYEOV2 PE=1 SV=1
IPECJ2_ENSSSCG00000007331 (pp) IPECJ2_XLOC_023587	Intra	0.956044	-1	9.46978e-08	9305.5	-0.956044	RB transcriptional corepressor like 1 [Source:HGNC Symbol;Acc:HGNC:9893]	IL-23 (Fragment) OS=Sus scrofa PE=2 SV=1
IPECJ2_ENSSSCG00000007331 (pp) IPECJ2_ENSSSCG00000017705	Intra	0.951648	-1	1.41528e-05	3309.5	-0.951648	RB transcriptional corepressor like 1 [Source:HGNC Symbol;Acc:HGNC:9893]	C-C motif chemokine ligand 5 [Source:HGNC Symbol;Acc:HGNC:10632]
IPECJ2_ENSSSCG00000007331 (pp) IPECJ2_ENSSSCG00000021825	Intra	0.951648	-1	1.41528e-05	3309.5	-0.951648	RB transcriptional corepressor like 1 [Source:HGNC Symbol;Acc:HGNC:9893]	40S ribosomal protein S21 [Source:UniProtKB/Swiss-Prot;Acc:P63221]
IPECJ2_ENSSSCG00000000469 (pp) AscL3_gene_GS_19483	Inter	0.96044	1	7.40017e-06	14245.5	0.96044	LEM domain containing 3 [Source:HGNC Symbol;Acc:HGNC:28887]	WD repeat-containing protein tag-125 OS=Caenorhabditis briggsae GN=tag-125 PE=4 SV=1
IPECJ2_ENSSSCG00000023960 (pp) IPECJ2_ENSSSCG00000003727	Intra	0.951648	1	1.41528e-05	3309.5	0.951648	Unknown	Isoform 2 of Trafficking protein particle complex subunit 8 OS=Homo sapiens GN=TRAPPC8
IPECJ2_ENSSSCG00000007472 (pp) IPECJ2_ENSSSCG00000029034	Intra	0.991209	1	6.5401e-12	28659.5	0.991209	breast carcinoma amplified sequence 4 [Source:HGNC Symbol;Acc:HGNC:14367]	cytochrome c oxidase subunit 4I1 [Source:HGNC Symbol;Acc:HGNC:2265]
IPECJ2_ENSSSCG00000023960 (pp) IPECJ2_ENSSSCG00000008762	Intra	0.951648	1	1.66161e-07	3309.5	0.951648	Unknown	stromal interaction molecule 2 [Source:HGNC Symbol;Acc:HGNC:19205]
IPECJ2_ENSSSCG00000007472 (pp) IPECJ2_ENSSSCG00000029161	Intra	0.991209	1	6.5401e-12	28659.5	0.991209	breast carcinoma amplified sequence 4 [Source:HGNC Symbol;Acc:HGNC:14367]	acireductone dioxygenase 1 [Source:HGNC Symbol;Acc:HGNC:30576]
IPECJ2_ENSSSCG00000023960 (pp) IPECJ2_ENSSSCG00000003670	Intra	0.973626	1	1.97568e-06	24252.5	0.973626	Unknown	rearranged L-myc fusion [Source:HGNC Symbol;Acc:HGNC:10025]
IPECJ2_ENSSSCG00000007472 (pp) IPECJ2_ENSSSCG00000013267	Intra	0.995604	1	2.81634e-09	28836.5	0.995604	breast carcinoma amplified sequence 4 [Source:HGNC Symbol;Acc:HGNC:14367]	peroxisomal biogenesis factor 16 [Source:HGNC Symbol;Acc:HGNC:8857]
IPECJ2_ENSSSCG00000023960 (pp) IPECJ2_ENSSSCG00000015972	Intra	0.956044	1	1.04633e-05	9305.5	0.956044	Unknown	Unknown
IPECJ2_ENSSSCG00000007472 (pp) IPECJ2_ENSSSCG00000025928	Intra	0.991209	1	6.5401e-12	28659.5	0.991209	breast carcinoma amplified sequence 4 [Source:HGNC Symbol;Acc:HGNC:14367]	ribosomal protein L18 [Source:HGNC Symbol;Acc:HGNC:10310]
IPECJ2_ENSSSCG00000007472 (pp) IPECJ2_ENSSSCG00000012842	Intra	0.978022	1	1.07614e-06	26153.5	0.978022	breast carcinoma amplified sequence 4 [Source:HGNC Symbol;Acc:HGNC:14367]	Unknown
IPECJ2_ENSSSCG00000007472 (pp) IPECJ2_ENSSSCG00000012965	Intra	0.973626	1	4.59028e-09	24252.5	0.973626	breast carcinoma amplified sequence 4 [Source:HGNC Symbol;Acc:HGNC:14367]	DR1 associated protein 1 [Source:HGNC Symbol;Acc:HGNC:3019]
IPECJ2_ENSSSCG00000007472 (pp) IPECJ2_ENSSSCG00000029362	Intra	0.991209	1	6.5401e-12	28659.5	0.991209	breast carcinoma amplified sequence 4 [Source:HGNC Symbol;Acc:HGNC:14367]	charged multivesicular body protein 2A [Source:HGNC Symbol;Acc:HGNC:30216]
IPECJ2_ENSSSCG00000007472 (pp) IPECJ2_ENSSSCG00000027840	Intra	0.986813	1	7.37952e-11	28223.5	0.986813	breast carcinoma amplified sequence 4 [Source:HGNC Symbol;Acc:HGNC:14367]	Unknown
IPECJ2_ENSSSCG00000007472 (pp) IPECJ2_ENSSSCG00000027971	Intra	0.973626	1	4.59028e-09	24252.5	0.973626	breast carcinoma amplified sequence 4 [Source:HGNC Symbol;Acc:HGNC:14367]	regulatory factor X associated ankyrin containing protein [Source:HGNC Symbol;Acc:HGNC:9987]
IPECJ2_ENSSSCG00000007472 (pp) IPECJ2_ENSSSCG00000020817	Intra	0.973626	1	1.97568e-06	24252.5	0.973626	breast carcinoma amplified sequence 4 [Source:HGNC Symbol;Acc:HGNC:14367]	40S ribosomal protein S16 [Source:UniProtKB/Swiss-Prot;Acc:Q29201]
IPECJ2_ENSSSCG00000007472 (pp) IPECJ2_ENSSSCG00000024974	Intra	0.973626	1	4.59028e-09	24252.5	0.973626	breast carcinoma amplified sequence 4 [Source:HGNC Symbol;Acc:HGNC:14367]	ribosomal protein L13 [Source:HGNC Symbol;Acc:HGNC:10303]
IPECJ2_ENSSSCG00000015786 (pp) IPECJ2_ENSSSCG00000025928	Intra	0.978022	-1	1.55196e-09	26153.5	-0.978022	Unknown	ribosomal protein L18 [Source:HGNC Symbol;Acc:HGNC:10310]
IPECJ2_ENSSSCG00000007472 (pp) IPECJ2_ENSSSCG00000020790	Intra	0.964835	1	5.02606e-06	18397.5	0.964835	breast carcinoma amplified sequence 4 [Source:HGNC Symbol;Acc:HGNC:14367]	Uncharacterized protein OS=Sus scrofa GN=MYEOV2 PE=1 SV=1
IPECJ2_ENSSSCG00000015786 (pp) IPECJ2_ENSSSCG00000029034	Intra	0.978022	-1	1.55196e-09	26153.5	-0.978022	Unknown	cytochrome c oxidase subunit 4I1 [Source:HGNC Symbol;Acc:HGNC:2265]
IPECJ2_ENSSSCG00000007472 (pp) IPECJ2_ENSSSCG00000019018	Intra	0.96044	1	7.40017e-06	14245.5	0.96044	breast carcinoma amplified sequence 4 [Source:HGNC Symbol;Acc:HGNC:14367]	Unknown
IPECJ2_ENSSSCG00000007472 (pp) IPECJ2_ENSSSCG00000012784	Intra	0.969231	1	3.28443e-06	21732.5	0.969231	breast carcinoma amplified sequence 4 [Source:HGNC Symbol;Acc:HGNC:14367]	signal sequence receptor subunit 4 [Source:HGNC Symbol;Acc:HGNC:11326]
IPECJ2_ENSSSCG00000015786 (pp) IPECJ2_ENSSSCG00000007472	Intra	0.978022	-1	1.55196e-09	26153.5	-0.978022	Unknown	breast carcinoma amplified sequence 4 [Source:HGNC Symbol;Acc:HGNC:14367]
IPECJ2_ENSSSCG00000007472 (pp) IPECJ2_XLOC_029898	Intra	0.956044	1	9.46978e-08	9305.5	0.956044	breast carcinoma amplified sequence 4 [Source:HGNC Symbol;Acc:HGNC:14367]	Proteasome subunit beta type-7 OS=Sus scrofa GN=PSMB7 PE=2 SV=2
IPECJ2_ENSSSCG00000029830 (pp) IPECJ2_ENSSSCG00000029034	Intra	0.995604	1	2.81634e-09	28836.5	0.995604	ribosomal protein L8 [Source:HGNC Symbol;Acc:HGNC:10368]	cytochrome c oxidase subunit 4I1 [Source:HGNC Symbol;Acc:HGNC:2265]
IPECJ2_ENSSSCG00000015786 (pp) IPECJ2_ENSSSCG00000029830	Intra	0.973626	-1	4.59028e-09	24252.5	-0.973626	Unknown	ribosomal protein L8 [Source:HGNC Symbol;Acc:HGNC:10368]
IPECJ2_ENSSSCG00000015786 (pp) IPECJ2_ENSSSCG00000001423	Intra	0.969231	-1	1.14652e-08	21732.5	-0.969231	Unknown	negative elongation factor complex member E [Source:HGNC Symbol;Acc:HGNC:13974]
IPECJ2_ENSSSCG00000029830 (pp) IPECJ2_ENSSSCG00000013267	Intra	0.991209	1	4.46942e-08	28659.5	0.991209	ribosomal protein L8 [Source:HGNC Symbol;Acc:HGNC:10368]	peroxisomal biogenesis factor 16 [Source:HGNC Symbol;Acc:HGNC:8857]
IPECJ2_ENSSSCG00000007472 (pp) IPECJ2_ENSSSCG00000017705	Intra	0.951648	1	1.41528e-05	3309.5	0.951648	breast carcinoma amplified sequence 4 [Source:HGNC Symbol;Acc:HGNC:14367]	C-C motif chemokine ligand 5 [Source:HGNC Symbol;Acc:HGNC:10632]
IPECJ2_ENSSSCG00000007472 (pp) IPECJ2_ENSSSCG00000026812	Intra	0.96044	1	5.08105e-08	14245.5	0.96044	breast carcinoma amplified sequence 4 [Source:HGNC Symbol;Acc:HGNC:14367]	Unknown
IPECJ2_ENSSSCG00000007472 (pp) IPECJ2_ENSSSCG00000007646	Intra	0.956044	1	1.04633e-05	9305.5	0.956044	breast carcinoma amplified sequence 4 [Source:HGNC Symbol;Acc:HGNC:14367]	late endosomal/lysosomal adaptor, MAPK and MTOR activator 4 [Source:HGNC Symbol;Acc:HGNC:33772]
IPECJ2_ENSSSCG00000029830 (pp) IPECJ2_ENSSSCG00000025928	Intra	0.995604	1	2.81634e-09	28836.5	0.995604	ribosomal protein L8 [Source:HGNC Symbol;Acc:HGNC:10368]	ribosomal protein L18 [Source:HGNC Symbol;Acc:HGNC:10310]
IPECJ2_ENSSSCG00000015786 (pp) IPECJ2_ENSSSCG00000013267	Intra	0.973626	-1	4.59028e-09	24252.5	-0.973626	Unknown	peroxisomal biogenesis factor 16 [Source:HGNC Symbol;Acc:HGNC:8857]
IPECJ2_ENSSSCG00000015786 (pp) IPECJ2_ENSSSCG00000006777	Intra	0.964835	-1	2.53041e-08	18397.5	-0.964835	Unknown	ras homolog family member C [Source:HGNC Symbol;Acc:HGNC:669]
IPECJ2_ENSSSCG00000029830 (pp) IPECJ2_ENSSSCG00000007472	Intra	0.986813	1	1.88722e-07	28223.5	0.986813	ribosomal protein L8 [Source:HGNC Symbol;Acc:HGNC:10368]	breast carcinoma amplified sequence 4 [Source:HGNC Symbol;Acc:HGNC:14367]
IPECJ2_ENSSSCG00000007472 (pp) IPECJ2_ENSSSCG00000027353	Intra	0.951648	1	1.66161e-07	3309.5	0.951648	breast carcinoma amplified sequence 4 [Source:HGNC Symbol;Acc:HGNC:14367]	Unknown
IPECJ2_ENSSSCG00000029830 (pp) IPECJ2_ENSSSCG00000029362	Intra	0.986813	1	7.37952e-11	28223.5	0.986813	ribosomal protein L8 [Source:HGNC Symbol;Acc:HGNC:10368]	charged multivesicular body protein 2A [Source:HGNC Symbol;Acc:HGNC:30216]
IPECJ2_ENSSSCG00000015786 (pp) IPECJ2_ENSSSCG00000029362	Intra	0.969231	-1	1.14652e-08	21732.5	-0.969231	Unknown	charged multivesicular body protein 2A [Source:HGNC Symbol;Acc:HGNC:30216]
IPECJ2_ENSSSCG00000015786 (pp) IPECJ2_ENSSSCG00000029161	Intra	0.964835	-1	2.53041e-08	18397.5	-0.964835	Unknown	acireductone dioxygenase 1 [Source:HGNC Symbol;Acc:HGNC:30576]
IPECJ2_ENSSSCG00000015786 (pp) IPECJ2_ENSSSCG00000027827	Intra	0.96044	-1	5.08105e-08	14245.5	-0.96044	Unknown	UDP-galactose-4-epimerase [Source:HGNC Symbol;Acc:HGNC:4116]
IPECJ2_ENSSSCG00000029830 (pp) IPECJ2_ENSSSCG00000012965	Intra	0.969231	1	3.28443e-06	21732.5	0.969231	ribosomal protein L8 [Source:HGNC Symbol;Acc:HGNC:10368]	DR1 associated protein 1 [Source:HGNC Symbol;Acc:HGNC:3019]
IPECJ2_ENSSSCG00000015786 (pp) IPECJ2_ENSSSCG00000023110	Intra	0.964835	-1	2.53041e-08	18397.5	-0.964835	Unknown	UBX domain protein 1 [Source:HGNC Symbol;Acc:HGNC:18402]
IPECJ2_ENSSSCG00000029830 (pp) IPECJ2_ENSSSCG00000020817	Intra	0.973626	1	1.97568e-06	24252.5	0.973626	ribosomal protein L8 [Source:HGNC Symbol;Acc:HGNC:10368]	40S ribosomal protein S16 [Source:UniProtKB/Swiss-Prot;Acc:Q29201]
IPECJ2_ENSSSCG00000029830 (pp) IPECJ2_ENSSSCG00000029161	Intra	0.973626	1	4.59028e-09	24252.5	0.973626	ribosomal protein L8 [Source:HGNC Symbol;Acc:HGNC:10368]	acireductone dioxygenase 1 [Source:HGNC Symbol;Acc:HGNC:30576]
IPECJ2_ENSSSCG00000029830 (pp) IPECJ2_ENSSSCG00000024974	Intra	0.96044	1	7.40017e-06	14245.5	0.96044	ribosomal protein L8 [Source:HGNC Symbol;Acc:HGNC:10368]	ribosomal protein L13 [Source:HGNC Symbol;Acc:HGNC:10303]
IPECJ2_ENSSSCG00000015786 (pp) IPECJ2_ENSSSCG00000024974	Intra	0.956044	-1	9.46978e-08	9305.5	-0.956044	Unknown	ribosomal protein L13 [Source:HGNC Symbol;Acc:HGNC:10303]
IPECJ2_ENSSSCG00000029830 (pp) IPECJ2_ENSSSCG00000026812	Intra	0.96044	1	7.40017e-06	14245.5	0.96044	ribosomal protein L8 [Source:HGNC Symbol;Acc:HGNC:10368]	Unknown
IPECJ2_ENSSSCG00000015786 (pp) IPECJ2_ENSSSCG00000027840	Intra	0.956044	-1	9.46978e-08	9305.5	-0.956044	Unknown	Unknown
IPECJ2_ENSSSCG00000015786 (pp) IPECJ2_ENSSSCG00000012842	Intra	0.956044	-1	9.46978e-08	9305.5	-0.956044	Unknown	Unknown
IPECJ2_ENSSSCG00000029830 (pp) IPECJ2_ENSSSCG00000012784	Intra	0.964835	1	5.02606e-06	18397.5	0.964835	ribosomal protein L8 [Source:HGNC Symbol;Acc:HGNC:10368]	signal sequence receptor subunit 4 [Source:HGNC Symbol;Acc:HGNC:11326]
IPECJ2_ENSSSCG00000029830 (pp) IPECJ2_ENSSSCG00000007646	Intra	0.96044	1	7.40017e-06	14245.5	0.96044	ribosomal protein L8 [Source:HGNC Symbol;Acc:HGNC:10368]	late endosomal/lysosomal adaptor, MAPK and MTOR activator 4 [Source:HGNC Symbol;Acc:HGNC:33772]
IPECJ2_ENSSSCG00000015786 (pp) IPECJ2_ENSSSCG00000014283	Intra	0.956044	1	1.04633e-05	9305.5	0.956044	Unknown	kinesin family member 3A [Source:HGNC Symbol;Acc:HGNC:6319]
IPECJ2_ENSSSCG00000015786 (pp) IPECJ2_ENSSSCG00000022647	Intra	0.951648	-1	1.66161e-07	3309.5	-0.951648	Unknown	translocase of inner mitochondrial membrane 17 homolog B (yeast) [Source:HGNC Symbol;Acc:HGNC:17310]
IPECJ2_ENSSSCG00000029830 (pp) IPECJ2_ENSSSCG00000019018	Intra	0.956044	1	1.04633e-05	9305.5	0.956044	ribosomal protein L8 [Source:HGNC Symbol;Acc:HGNC:10368]	Unknown
IPECJ2_ENSSSCG00000029830 (pp) IPECJ2_ENSSSCG00000027971	Intra	0.96044	1	5.08105e-08	14245.5	0.96044	ribosomal protein L8 [Source:HGNC Symbol;Acc:HGNC:10368]	regulatory factor X associated ankyrin containing protein [Source:HGNC Symbol;Acc:HGNC:9987]
IPECJ2_ENSSSCG00000015786 (pp) IPECJ2_ENSSSCG00000017114	Intra	0.951648	-1	1.66161e-07	3309.5	-0.951648	Unknown	NADH:ubiquinone oxidoreductase subunit S6 [Source:HGNC Symbol;Acc:HGNC:7713]
IPECJ2_ENSSSCG00000029830 (pp) IPECJ2_XLOC_029898	Intra	0.96044	1	7.40017e-06	14245.5	0.96044	ribosomal protein L8 [Source:HGNC Symbol;Acc:HGNC:10368]	Proteasome subunit beta type-7 OS=Sus scrofa GN=PSMB7 PE=2 SV=2
IPECJ2_ENSSSCG00000011010 (pp) IPECJ2_ENSSSCG00000014204	Intra	0.956044	1	1.04633e-05	9305.5	0.956044	chromosome 9 open reading frame 72 [Source:HGNC Symbol;Acc:HGNC:28337]	decapping mRNA 2 [Source:HGNC Symbol;Acc:HGNC:24452]
IPECJ2_ENSSSCG00000029855 (pp) IPECJ2_ENSSSCG00000023325	Intra	0.991209	1	4.46942e-08	28659.5	0.991209	lipoma HMGIC fusion partner [Source:HGNC Symbol;Acc:HGNC:6586]	Aminoacylase-1 [Source:UniProtKB/Swiss-Prot;Acc:P37111]
IPECJ2_ENSSSCG00000011010 (pp) AscL3_XLOC_012561	Inter	0.964835	-1	5.02606e-06	18397.5	-0.964835	chromosome 9 open reading frame 72 [Source:HGNC Symbol;Acc:HGNC:28337]	Unknown
IPECJ2_ENSSSCG00000029830 (pp) IPECJ2_ENSSSCG00000020790	Intra	0.951648	1	1.41528e-05	3309.5	0.951648	ribosomal protein L8 [Source:HGNC Symbol;Acc:HGNC:10368]	Uncharacterized protein OS=Sus scrofa GN=MYEOV2 PE=1 SV=1
IPECJ2_ENSSSCG00000029855 (pp) IPECJ2_ENSSSCG00000013267	Intra	0.978022	1	1.07614e-06	26153.5	0.978022	lipoma HMGIC fusion partner [Source:HGNC Symbol;Acc:HGNC:6586]	peroxisomal biogenesis factor 16 [Source:HGNC Symbol;Acc:HGNC:8857]
IPECJ2_ENSSSCG00000029855 (pp) IPECJ2_ENSSSCG00000027840	Intra	0.978022	1	1.55196e-09	26153.5	0.978022	lipoma HMGIC fusion partner [Source:HGNC Symbol;Acc:HGNC:6586]	Unknown
IPECJ2_ENSSSCG00000029855 (pp) IPECJ2_ENSSSCG00000006777	Intra	0.986813	1	1.88722e-07	28223.5	0.986813	lipoma HMGIC fusion partner [Source:HGNC Symbol;Acc:HGNC:6586]	ras homolog family member C [Source:HGNC Symbol;Acc:HGNC:669]
IPECJ2_ENSSSCG00000029855 (pp) IPECJ2_ENSSSCG00000022647	Intra	0.982418	1	5.27924e-07	27446.5	0.982418	lipoma HMGIC fusion partner [Source:HGNC Symbol;Acc:HGNC:6586]	translocase of inner mitochondrial membrane 17 homolog B (yeast) [Source:HGNC Symbol;Acc:HGNC:17310]
IPECJ2_ENSSSCG00000029855 (pp) IPECJ2_ENSSSCG00000025868	Intra	0.969231	1	3.28443e-06	21732.5	0.969231	lipoma HMGIC fusion partner [Source:HGNC Symbol;Acc:HGNC:6586]	Unknown
IPECJ2_ENSSSCG00000029855 (pp) IPECJ2_ENSSSCG00000027308	Intra	0.969231	1	1.14652e-08	21732.5	0.969231	lipoma HMGIC fusion partner [Source:HGNC Symbol;Acc:HGNC:6586]	Unknown
IPECJ2_ENSSSCG00000029855 (pp) IPECJ2_ENSSSCG00000013619	Intra	0.973626	1	1.97568e-06	24252.5	0.973626	lipoma HMGIC fusion partner [Source:HGNC Symbol;Acc:HGNC:6586]	SWIM-type zinc finger 7 associated protein 1 [Source:HGNC Symbol;Acc:HGNC:26638]
IPECJ2_ENSSSCG00000029855 (pp) IPECJ2_ENSSSCG00000007472	Intra	0.969231	1	3.28443e-06	21732.5	0.969231	lipoma HMGIC fusion partner [Source:HGNC Symbol;Acc:HGNC:6586]	breast carcinoma amplified sequence 4 [Source:HGNC Symbol;Acc:HGNC:14367]
IPECJ2_ENSSSCG00000029855 (pp) IPECJ2_ENSSSCG00000017114	Intra	0.96044	1	7.40017e-06	14245.5	0.96044	lipoma HMGIC fusion partner [Source:HGNC Symbol;Acc:HGNC:6586]	NADH:ubiquinone oxidoreductase subunit S6 [Source:HGNC Symbol;Acc:HGNC:7713]
IPECJ2_ENSSSCG00000029855 (pp) IPECJ2_ENSSSCG00000025928	Intra	0.96044	1	7.40017e-06	14245.5	0.96044	lipoma HMGIC fusion partner [Source:HGNC Symbol;Acc:HGNC:6586]	ribosomal protein L18 [Source:HGNC Symbol;Acc:HGNC:10310]
IPECJ2_ENSSSCG00000029855 (pp) IPECJ2_ENSSSCG00000001423	Intra	0.964835	1	2.53041e-08	18397.5	0.964835	lipoma HMGIC fusion partner [Source:HGNC Symbol;Acc:HGNC:6586]	negative elongation factor complex member E [Source:HGNC Symbol;Acc:HGNC:13974]
IPECJ2_ENSSSCG00000029855 (pp) IPECJ2_ENSSSCG00000001884	Intra	0.964835	1	5.02606e-06	18397.5	0.964835	lipoma HMGIC fusion partner [Source:HGNC Symbol;Acc:HGNC:6586]	COMM domain containing 4 [Source:HGNC Symbol;Acc:HGNC:26027]
IPECJ2_ENSSSCG00000029855 (pp) IPECJ2_ENSSSCG00000007189	Intra	0.956044	1	1.04633e-05	9305.5	0.956044	lipoma HMGIC fusion partner [Source:HGNC Symbol;Acc:HGNC:6586]	syndecan binding protein 2 [Source:HGNC Symbol;Acc:HGNC:15756]
IPECJ2_ENSSSCG00000029855 (pp) IPECJ2_ENSSSCG00000029161	Intra	0.956044	1	9.46978e-08	9305.5	0.956044	lipoma HMGIC fusion partner [Source:HGNC Symbol;Acc:HGNC:6586]	acireductone dioxygenase 1 [Source:HGNC Symbol;Acc:HGNC:30576]
IPECJ2_ENSSSCG00000029855 (pp) IPECJ2_ENSSSCG00000027827	Intra	0.96044	1	5.08105e-08	14245.5	0.96044	lipoma HMGIC fusion partner [Source:HGNC Symbol;Acc:HGNC:6586]	UDP-galactose-4-epimerase [Source:HGNC Symbol;Acc:HGNC:4116]
IPECJ2_ENSSSCG00000029855 (pp) IPECJ2_ENSSSCG00000029034	Intra	0.96044	1	7.40017e-06	14245.5	0.96044	lipoma HMGIC fusion partner [Source:HGNC Symbol;Acc:HGNC:6586]	cytochrome c oxidase subunit 4I1 [Source:HGNC Symbol;Acc:HGNC:2265]
IPECJ2_ENSSSCG00000029855 (pp) IPECJ2_ENSSSCG00000026914	Intra	0.951648	1	1.66161e-07	3309.5	0.951648	lipoma HMGIC fusion partner [Source:HGNC Symbol;Acc:HGNC:6586]	phospholipase A2 group XVI [Source:HGNC Symbol;Acc:HGNC:17825]
IPECJ2_ENSSSCG00000029855 (pp) IPECJ2_ENSSSCG00000029830	Intra	0.951648	1	1.41528e-05	3309.5	0.951648	lipoma HMGIC fusion partner [Source:HGNC Symbol;Acc:HGNC:6586]	ribosomal protein L8 [Source:HGNC Symbol;Acc:HGNC:10368]
IPECJ2_ENSSSCG00000015972 (pp) IPECJ2_ENSSSCG00000003727	Intra	0.969231	1	1.14652e-08	21732.5	0.969231	Unknown	Isoform 2 of Trafficking protein particle complex subunit 8 OS=Homo sapiens GN=TRAPPC8
IPECJ2_ENSSSCG00000024180 (pp) IPECJ2_ENSSSCG00000010865	Intra	0.969231	1	1.14652e-08	21732.5	0.969231	peripherial benzodiazepine receptor associated protein [Source:RefSeq peptide;Acc:NP_001009581]	exonuclease 1 [Source:HGNC Symbol;Acc:HGNC:3511]
IPECJ2_ENSSSCG00000015972 (pp) IPECJ2_ENSSSCG00000008600	Intra	0.956044	1	1.04633e-05	9305.5	0.956044	Unknown	pumilio RNA binding family member 2 [Source:HGNC Symbol;Acc:HGNC:14958]
IPECJ2_ENSSSCG00000024180 (pp) IPECJ2_ENSSSCG00000017308	Intra	0.96044	1	5.08105e-08	14245.5	0.96044	peripherial benzodiazepine receptor associated protein [Source:RefSeq peptide;Acc:NP_001009581]	cell division cycle 27 [Source:HGNC Symbol;Acc:HGNC:1728]
IPECJ2_ENSSSCG00000024180 (pp) IPECJ2_ENSSSCG00000001922	Intra	0.96044	1	7.40017e-06	14245.5	0.96044	peripherial benzodiazepine receptor associated protein [Source:RefSeq peptide;Acc:NP_001009581]	ariadne RBR E3 ubiquitin protein ligase 1 [Source:HGNC Symbol;Acc:HGNC:689]
IPECJ2_ENSSSCG00000024180 (pp) IPECJ2_ENSSSCG00000014076	Intra	0.96044	1	7.40017e-06	14245.5	0.96044	peripherial benzodiazepine receptor associated protein [Source:RefSeq peptide;Acc:NP_001009581]	Isoform 2 of Soluble lamin-associated protein of 75 kDa OS=Homo sapiens GN=FAM169A
IPECJ2_ENSSSCG00000024180 (pp) IPECJ2_ENSSSCG00000021825	Intra	0.956044	-1	1.04633e-05	9305.5	-0.956044	peripherial benzodiazepine receptor associated protein [Source:RefSeq peptide;Acc:NP_001009581]	40S ribosomal protein S21 [Source:UniProtKB/Swiss-Prot;Acc:P63221]
IPECJ2_ENSSSCG00000024180 (pp) IPECJ2_ENSSSCG00000019018	Intra	0.951648	-1	1.41528e-05	3309.5	-0.951648	peripherial benzodiazepine receptor associated protein [Source:RefSeq peptide;Acc:NP_001009581]	Unknown
IPECJ2_ENSSSCG00000024180 (pp) IPECJ2_ENSSSCG00000020790	Intra	0.951648	-1	1.41528e-05	3309.5	-0.951648	peripherial benzodiazepine receptor associated protein [Source:RefSeq peptide;Acc:NP_001009581]	Uncharacterized protein OS=Sus scrofa GN=MYEOV2 PE=1 SV=1
IPECJ2_ENSSSCG00000024180 (pp) IPECJ2_XLOC_011183	Intra	0.951648	-1	1.66161e-07	3309.5	-0.951648	peripherial benzodiazepine receptor associated protein [Source:RefSeq peptide;Acc:NP_001009581]	Inosine triphosphate pyrophosphatase OS=Bos taurus GN=ITPA PE=2 SV=1
IPECJ2_ENSSSCG00000030018 (pp) IPECJ2_ENSSSCG00000010239	Intra	0.956044	1	1.04633e-05	9305.5	0.956044	zinc finger protein 396 [Source:HGNC Symbol;Acc:HGNC:18824]	RUN and FYVE domain containing 2 [Source:HGNC Symbol;Acc:HGNC:19761]
IPECJ2_ENSSSCG00000011213 (pp) IPECJ2_ENSSSCG00000023325	Intra	0.973626	-1	1.97568e-06	24252.5	-0.973626	topoisomerase (DNA) II beta 180kDa [Source:RefSeq peptide;Acc:NP_001245315]	Aminoacylase-1 [Source:UniProtKB/Swiss-Prot;Acc:P37111]
IPECJ2_ENSSSCG00000011213 (pp) IPECJ2_ENSSSCG00000029855	Intra	0.964835	-1	2.53041e-08	18397.5	-0.964835	topoisomerase (DNA) II beta 180kDa [Source:RefSeq peptide;Acc:NP_001245315]	lipoma HMGIC fusion partner [Source:HGNC Symbol;Acc:HGNC:6586]
IPECJ2_ENSSSCG00000011213 (pp) IPECJ2_ENSSSCG00000012905	Intra	0.96044	-1	7.40017e-06	14245.5	-0.96044	topoisomerase (DNA) II beta 180kDa [Source:RefSeq peptide;Acc:NP_001245315]	transmembrane protein 134 [Source:HGNC Symbol;Acc:HGNC:26142]
IPECJ2_ENSSSCG00000011213 (pp) IPECJ2_ENSSSCG00000022867	Intra	0.969231	-1	1.14652e-08	21732.5	-0.969231	topoisomerase (DNA) II beta 180kDa [Source:RefSeq peptide;Acc:NP_001245315]	Unknown
IPECJ2_ENSSSCG00000011213 (pp) IPECJ2_ENSSSCG00000007281	Intra	0.964835	-1	5.02606e-06	18397.5	-0.964835	topoisomerase (DNA) II beta 180kDa [Source:RefSeq peptide;Acc:NP_001245315]	microtubule associated protein 1 light chain 3 alpha [Source:HGNC Symbol;Acc:HGNC:6838]
IPECJ2_ENSSSCG00000011213 (pp) IPECJ2_ENSSSCG00000022647	Intra	0.956044	-1	9.46978e-08	9305.5	-0.956044	topoisomerase (DNA) II beta 180kDa [Source:RefSeq peptide;Acc:NP_001245315]	translocase of inner mitochondrial membrane 17 homolog B (yeast) [Source:HGNC Symbol;Acc:HGNC:17310]
IPECJ2_ENSSSCG00000024201 (pp) IPECJ2_ENSSSCG00000006530	Intra	0.969231	-1	3.28443e-06	21732.5	-0.969231	family with sequence similarity 208 member A [Source:HGNC Symbol;Acc:HGNC:30314]	ephrin-A1 [Source:HGNC Symbol;Acc:HGNC:3221]
IPECJ2_ENSSSCG00000024254 (pp) IPECJ2_ENSSSCG00000006777	Intra	0.982418	1	4.10718e-10	27446.5	0.982418	alkB homolog 7 [Source:HGNC Symbol;Acc:HGNC:21306]	ras homolog family member C [Source:HGNC Symbol;Acc:HGNC:669]
IPECJ2_ENSSSCG00000024254 (pp) IPECJ2_ENSSSCG00000027308	Intra	0.982418	1	4.10718e-10	27446.5	0.982418	alkB homolog 7 [Source:HGNC Symbol;Acc:HGNC:21306]	Unknown
IPECJ2_ENSSSCG00000024254 (pp) IPECJ2_ENSSSCG00000029855	Intra	0.973626	1	4.59028e-09	24252.5	0.973626	alkB homolog 7 [Source:HGNC Symbol;Acc:HGNC:21306]	lipoma HMGIC fusion partner [Source:HGNC Symbol;Acc:HGNC:6586]
IPECJ2_ENSSSCG00000024254 (pp) IPECJ2_ENSSSCG00000001884	Intra	0.969231	1	3.28443e-06	21732.5	0.969231	alkB homolog 7 [Source:HGNC Symbol;Acc:HGNC:21306]	COMM domain containing 4 [Source:HGNC Symbol;Acc:HGNC:26027]
IPECJ2_ENSSSCG00000024254 (pp) IPECJ2_ENSSSCG00000007189	Intra	0.973626	1	1.97568e-06	24252.5	0.973626	alkB homolog 7 [Source:HGNC Symbol;Acc:HGNC:21306]	syndecan binding protein 2 [Source:HGNC Symbol;Acc:HGNC:15756]
IPECJ2_ENSSSCG00000024254 (pp) IPECJ2_ENSSSCG00000027827	Intra	0.973626	1	4.59028e-09	24252.5	0.973626	alkB homolog 7 [Source:HGNC Symbol;Acc:HGNC:21306]	UDP-galactose-4-epimerase [Source:HGNC Symbol;Acc:HGNC:4116]
IPECJ2_ENSSSCG00000024254 (pp) IPECJ2_ENSSSCG00000023110	Intra	0.964835	1	2.53041e-08	18397.5	0.964835	alkB homolog 7 [Source:HGNC Symbol;Acc:HGNC:21306]	UBX domain protein 1 [Source:HGNC Symbol;Acc:HGNC:18402]
IPECJ2_ENSSSCG00000024254 (pp) IPECJ2_ENSSSCG00000025868	Intra	0.964835	1	2.53041e-08	18397.5	0.964835	alkB homolog 7 [Source:HGNC Symbol;Acc:HGNC:21306]	Unknown
IPECJ2_ENSSSCG00000024254 (pp) IPECJ2_ENSSSCG00000013267	Intra	0.969231	1	3.28443e-06	21732.5	0.969231	alkB homolog 7 [Source:HGNC Symbol;Acc:HGNC:21306]	peroxisomal biogenesis factor 16 [Source:HGNC Symbol;Acc:HGNC:8857]
IPECJ2_ENSSSCG00000024254 (pp) IPECJ2_ENSSSCG00000007472	Intra	0.964835	1	5.02606e-06	18397.5	0.964835	alkB homolog 7 [Source:HGNC Symbol;Acc:HGNC:21306]	breast carcinoma amplified sequence 4 [Source:HGNC Symbol;Acc:HGNC:14367]
IPECJ2_ENSSSCG00000024254 (pp) IPECJ2_ENSSSCG00000025928	Intra	0.96044	1	5.08105e-08	14245.5	0.96044	alkB homolog 7 [Source:HGNC Symbol;Acc:HGNC:21306]	ribosomal protein L18 [Source:HGNC Symbol;Acc:HGNC:10310]
IPECJ2_ENSSSCG00000024254 (pp) IPECJ2_ENSSSCG00000029034	Intra	0.96044	1	5.08105e-08	14245.5	0.96044	alkB homolog 7 [Source:HGNC Symbol;Acc:HGNC:21306]	cytochrome c oxidase subunit 4I1 [Source:HGNC Symbol;Acc:HGNC:2265]
IPECJ2_ENSSSCG00000024254 (pp) IPECJ2_ENSSSCG00000027840	Intra	0.964835	1	2.53041e-08	18397.5	0.964835	alkB homolog 7 [Source:HGNC Symbol;Acc:HGNC:21306]	Unknown
IPECJ2_ENSSSCG00000024254 (pp) IPECJ2_ENSSSCG00000029830	Intra	0.964835	1	2.53041e-08	18397.5	0.964835	alkB homolog 7 [Source:HGNC Symbol;Acc:HGNC:21306]	ribosomal protein L8 [Source:HGNC Symbol;Acc:HGNC:10368]
IPECJ2_ENSSSCG00000024254 (pp) IPECJ2_XLOC_005381	Intra	0.956044	1	9.46978e-08	9305.5	0.956044	alkB homolog 7 [Source:HGNC Symbol;Acc:HGNC:21306]	Unknown
IPECJ2_ENSSSCG00000024254 (pp) IPECJ2_ENSSSCG00000001423	Intra	0.956044	1	9.46978e-08	9305.5	0.956044	alkB homolog 7 [Source:HGNC Symbol;Acc:HGNC:21306]	negative elongation factor complex member E [Source:HGNC Symbol;Acc:HGNC:13974]
IPECJ2_ENSSSCG00000024254 (pp) IPECJ2_ENSSSCG00000022647	Intra	0.956044	1	9.46978e-08	9305.5	0.956044	alkB homolog 7 [Source:HGNC Symbol;Acc:HGNC:21306]	translocase of inner mitochondrial membrane 17 homolog B (yeast) [Source:HGNC Symbol;Acc:HGNC:17310]
IPECJ2_ENSSSCG00000007646 (pp) IPECJ2_ENSSSCG00000020817	Intra	0.991209	1	4.46942e-08	28659.5	0.991209	late endosomal/lysosomal adaptor, MAPK and MTOR activator 4 [Source:HGNC Symbol;Acc:HGNC:33772]	40S ribosomal protein S16 [Source:UniProtKB/Swiss-Prot;Acc:Q29201]
IPECJ2_ENSSSCG00000007646 (pp) IPECJ2_ENSSSCG00000027971	Intra	0.986813	1	7.37952e-11	28223.5	0.986813	late endosomal/lysosomal adaptor, MAPK and MTOR activator 4 [Source:HGNC Symbol;Acc:HGNC:33772]	regulatory factor X associated ankyrin containing protein [Source:HGNC Symbol;Acc:HGNC:9987]
IPECJ2_ENSSSCG00000007646 (pp) IPECJ2_ENSSSCG00000012784	Intra	0.995604	1	1.03029e-13	28836.5	0.995604	late endosomal/lysosomal adaptor, MAPK and MTOR activator 4 [Source:HGNC Symbol;Acc:HGNC:33772]	signal sequence receptor subunit 4 [Source:HGNC Symbol;Acc:HGNC:11326]
IPECJ2_ENSSSCG00000007646 (pp) IPECJ2_ENSSSCG00000012965	Intra	0.991209	1	6.5401e-12	28659.5	0.991209	late endosomal/lysosomal adaptor, MAPK and MTOR activator 4 [Source:HGNC Symbol;Acc:HGNC:33772]	DR1 associated protein 1 [Source:HGNC Symbol;Acc:HGNC:3019]
IPECJ2_ENSSSCG00000007646 (pp) IPECJ2_ENSSSCG00000021825	Intra	0.982418	1	5.27924e-07	27446.5	0.982418	late endosomal/lysosomal adaptor, MAPK and MTOR activator 4 [Source:HGNC Symbol;Acc:HGNC:33772]	40S ribosomal protein S21 [Source:UniProtKB/Swiss-Prot;Acc:P63221]
IPECJ2_ENSSSCG00000007646 (pp) IPECJ2_XLOC_029898	Intra	0.986813	1	7.37952e-11	28223.5	0.986813	late endosomal/lysosomal adaptor, MAPK and MTOR activator 4 [Source:HGNC Symbol;Acc:HGNC:33772]	Proteasome subunit beta type-7 OS=Sus scrofa GN=PSMB7 PE=2 SV=2
IPECJ2_ENSSSCG00000007646 (pp) IPECJ2_ENSSSCG00000020790	Intra	0.982418	1	5.27924e-07	27446.5	0.982418	late endosomal/lysosomal adaptor, MAPK and MTOR activator 4 [Source:HGNC Symbol;Acc:HGNC:33772]	Uncharacterized protein OS=Sus scrofa GN=MYEOV2 PE=1 SV=1
IPECJ2_ENSSSCG00000007646 (pp) IPECJ2_ENSSSCG00000010631	Intra	0.978022	-1	1.55196e-09	26153.5	-0.978022	late endosomal/lysosomal adaptor, MAPK and MTOR activator 4 [Source:HGNC Symbol;Acc:HGNC:33772]	glycerol-3-phosphate acyltransferase, mitochondrial [Source:HGNC Symbol;Acc:HGNC:24865]
IPECJ2_ENSSSCG00000007646 (pp) IPECJ2_ENSSSCG00000017705	Intra	0.978022	1	1.07614e-06	26153.5	0.978022	late endosomal/lysosomal adaptor, MAPK and MTOR activator 4 [Source:HGNC Symbol;Acc:HGNC:33772]	C-C motif chemokine ligand 5 [Source:HGNC Symbol;Acc:HGNC:10632]
IPECJ2_ENSSSCG00000007646 (pp) IPECJ2_ENSSSCG00000026812	Intra	0.982418	1	4.10718e-10	27446.5	0.982418	late endosomal/lysosomal adaptor, MAPK and MTOR activator 4 [Source:HGNC Symbol;Acc:HGNC:33772]	Unknown
IPECJ2_ENSSSCG00000007646 (pp) IPECJ2_ENSSSCG00000019018	Intra	0.978022	1	1.07614e-06	26153.5	0.978022	late endosomal/lysosomal adaptor, MAPK and MTOR activator 4 [Source:HGNC Symbol;Acc:HGNC:33772]	Unknown
IPECJ2_ENSSSCG00000007646 (pp) IPECJ2_ENSSSCG00000024974	Intra	0.973626	1	4.59028e-09	24252.5	0.973626	late endosomal/lysosomal adaptor, MAPK and MTOR activator 4 [Source:HGNC Symbol;Acc:HGNC:33772]	ribosomal protein L13 [Source:HGNC Symbol;Acc:HGNC:10303]
IPECJ2_ENSSSCG00000007646 (pp) IPECJ2_ENSSSCG00000025928	Intra	0.973626	1	4.59028e-09	24252.5	0.973626	late endosomal/lysosomal adaptor, MAPK and MTOR activator 4 [Source:HGNC Symbol;Acc:HGNC:33772]	ribosomal protein L18 [Source:HGNC Symbol;Acc:HGNC:10310]
IPECJ2_ENSSSCG00000007646 (pp) IPECJ2_ENSSSCG00000027353	Intra	0.973626	1	4.59028e-09	24252.5	0.973626	late endosomal/lysosomal adaptor, MAPK and MTOR activator 4 [Source:HGNC Symbol;Acc:HGNC:33772]	Unknown
IPECJ2_ENSSSCG00000007646 (pp) IPECJ2_ENSSSCG00000029034	Intra	0.973626	1	4.59028e-09	24252.5	0.973626	late endosomal/lysosomal adaptor, MAPK and MTOR activator 4 [Source:HGNC Symbol;Acc:HGNC:33772]	cytochrome c oxidase subunit 4I1 [Source:HGNC Symbol;Acc:HGNC:2265]
IPECJ2_ENSSSCG00000007646 (pp) IPECJ2_XLOC_011183	Intra	0.969231	1	1.14652e-08	21732.5	0.969231	late endosomal/lysosomal adaptor, MAPK and MTOR activator 4 [Source:HGNC Symbol;Acc:HGNC:33772]	Inosine triphosphate pyrophosphatase OS=Bos taurus GN=ITPA PE=2 SV=1
IPECJ2_ENSSSCG00000007646 (pp) IPECJ2_ENSSSCG00000013267	Intra	0.964835	1	2.53041e-08	18397.5	0.964835	late endosomal/lysosomal adaptor, MAPK and MTOR activator 4 [Source:HGNC Symbol;Acc:HGNC:33772]	peroxisomal biogenesis factor 16 [Source:HGNC Symbol;Acc:HGNC:8857]
IPECJ2_ENSSSCG00000007646 (pp) IPECJ2_ENSSSCG00000012842	Intra	0.969231	1	1.14652e-08	21732.5	0.969231	late endosomal/lysosomal adaptor, MAPK and MTOR activator 4 [Source:HGNC Symbol;Acc:HGNC:33772]	Unknown
IPECJ2_ENSSSCG00000007646 (pp) IPECJ2_ENSSSCG00000029362	Intra	0.969231	1	1.14652e-08	21732.5	0.969231	late endosomal/lysosomal adaptor, MAPK and MTOR activator 4 [Source:HGNC Symbol;Acc:HGNC:33772]	charged multivesicular body protein 2A [Source:HGNC Symbol;Acc:HGNC:30216]
IPECJ2_ENSSSCG00000007646 (pp) IPECJ2_ENSSSCG00000017308	Intra	0.96044	-1	5.08105e-08	14245.5	-0.96044	late endosomal/lysosomal adaptor, MAPK and MTOR activator 4 [Source:HGNC Symbol;Acc:HGNC:33772]	cell division cycle 27 [Source:HGNC Symbol;Acc:HGNC:1728]
IPECJ2_ENSSSCG00000007646 (pp) IPECJ2_ENSSSCG00000029161	Intra	0.964835	1	2.53041e-08	18397.5	0.964835	late endosomal/lysosomal adaptor, MAPK and MTOR activator 4 [Source:HGNC Symbol;Acc:HGNC:33772]	acireductone dioxygenase 1 [Source:HGNC Symbol;Acc:HGNC:30576]
IPECJ2_ENSSSCG00000007646 (pp) IPECJ2_ENSSSCG00000010063	Intra	0.956044	1	9.46978e-08	9305.5	0.956044	late endosomal/lysosomal adaptor, MAPK and MTOR activator 4 [Source:HGNC Symbol;Acc:HGNC:33772]	Macrophage migration inhibitory factor OS=Sus scrofa GN=MIF PE=1 SV=3
IPECJ2_ENSSSCG00000007646 (pp) IPECJ2_ENSSSCG00000027840	Intra	0.956044	1	9.46978e-08	9305.5	0.956044	late endosomal/lysosomal adaptor, MAPK and MTOR activator 4 [Source:HGNC Symbol;Acc:HGNC:33772]	Unknown
IPECJ2_ENSSSCG00000007672 (pp) IPECJ2_ENSSSCG00000003772	Intra	0.956044	-1	1.04633e-05	9305.5	-0.956044	POP7 homolog, ribonuclease P/MRP subunit [Source:HGNC Symbol;Acc:HGNC:19949]	zinc finger ZZ-type containing 3 [Source:HGNC Symbol;Acc:HGNC:24523]
IPECJ2_ENSSSCG00000007672 (pp) IPECJ2_ENSSSCG00000015073	Intra	0.956044	1	1.04633e-05	9305.5	0.956044	POP7 homolog, ribonuclease P/MRP subunit [Source:HGNC Symbol;Acc:HGNC:19949]	transgelin [Source:HGNC Symbol;Acc:HGNC:11553]
IPECJ2_ENSSSCG00000000754 (pp) AscL3_XLOC_012561	Inter	0.969231	-1	3.28443e-06	21732.5	-0.969231	RAD52 homolog, DNA repair protein [Source:HGNC Symbol;Acc:HGNC:9824]	Unknown
IPECJ2_ENSSSCG00000000769 (pp) IPECJ2_ENSSSCG00000021542	Intra	0.982418	1	4.10718e-10	27446.5	0.982418	BH3 interacting domain death agonist [Source:HGNC Symbol;Acc:HGNC:1050]	Unknown
IPECJ2_ENSSSCG00000000754 (pp) IPECJ2_ENSSSCG00000015497	Intra	0.978022	1	1.07614e-06	26153.5	0.978022	RAD52 homolog, DNA repair protein [Source:HGNC Symbol;Acc:HGNC:9824]	kelch like family member 20 [Source:HGNC Symbol;Acc:HGNC:25056]
IPECJ2_ENSSSCG00000000769 (pp) IPECJ2_ENSSSCG00000014283	Intra	0.969231	-1	1.14652e-08	21732.5	-0.969231	BH3 interacting domain death agonist [Source:HGNC Symbol;Acc:HGNC:1050]	kinesin family member 3A [Source:HGNC Symbol;Acc:HGNC:6319]
IPECJ2_ENSSSCG00000000769 (pp) AscL3_gene_L3E_01572	Inter	0.964835	-1	5.02606e-06	18397.5	-0.964835	BH3 interacting domain death agonist [Source:HGNC Symbol;Acc:HGNC:1050]	Bm1034 OS=Brugia malayi GN=Bm1034 PE=4 SV=1
IPECJ2_ENSSSCG00000000769 (pp) IPECJ2_ENSSSCG00000009479	Intra	0.969231	-1	1.14652e-08	21732.5	-0.969231	BH3 interacting domain death agonist [Source:HGNC Symbol;Acc:HGNC:1050]	RNA binding motif protein 26 [Source:HGNC Symbol;Acc:HGNC:20327]
IPECJ2_ENSSSCG00000000769 (pp) IPECJ2_ENSSSCG00000012905	Intra	0.96044	1	5.08105e-08	14245.5	0.96044	BH3 interacting domain death agonist [Source:HGNC Symbol;Acc:HGNC:1050]	transmembrane protein 134 [Source:HGNC Symbol;Acc:HGNC:26142]
IPECJ2_ENSSSCG00000000769 (pp) IPECJ2_ENSSSCG00000025293	Intra	0.951648	-1	1.66161e-07	3309.5	-0.951648	BH3 interacting domain death agonist [Source:HGNC Symbol;Acc:HGNC:1050]	helicase like transcription factor [Source:HGNC Symbol;Acc:HGNC:11099]
IPECJ2_ENSSSCG00000000769 (pp) IPECJ2_ENSSSCG00000025868	Intra	0.951648	1	1.66161e-07	3309.5	0.951648	BH3 interacting domain death agonist [Source:HGNC Symbol;Acc:HGNC:1050]	Unknown
IPECJ2_ENSSSCG00000024666 (pp) IPECJ2_ENSSSCG00000003080	Intra	0.978022	1	1.55196e-09	26153.5	0.978022	FXYD domain containing ion transport regulator 3 [Source:HGNC Symbol;Acc:HGNC:4027]	immunoglobulin superfamily member 23 [Source:HGNC Symbol;Acc:HGNC:40040]
IPECJ2_ENSSSCG00000016098 (pp) IPECJ2_ENSSSCG00000014076	Intra	0.982418	1	5.27924e-07	27446.5	0.982418	Unknown	Isoform 2 of Soluble lamin-associated protein of 75 kDa OS=Homo sapiens GN=FAM169A
IPECJ2_ENSSSCG00000016098 (pp) IPECJ2_ENSSSCG00000017308	Intra	0.982418	1	4.10718e-10	27446.5	0.982418	Unknown	cell division cycle 27 [Source:HGNC Symbol;Acc:HGNC:1728]
IPECJ2_ENSSSCG00000024666 (pp) IPECJ2_ENSSSCG00000029034	Intra	0.956044	1	9.46978e-08	9305.5	0.956044	FXYD domain containing ion transport regulator 3 [Source:HGNC Symbol;Acc:HGNC:4027]	cytochrome c oxidase subunit 4I1 [Source:HGNC Symbol;Acc:HGNC:2265]
IPECJ2_ENSSSCG00000024666 (pp) AscL3_gene_GS_09942	Inter	0.951648	-1	1.41528e-05	3309.5	-0.951648	FXYD domain containing ion transport regulator 3 [Source:HGNC Symbol;Acc:HGNC:4027]	Sperm-specific protein OS=Ascaris suum GN=ASU_04668 PE=4 SV=1
IPECJ2_ENSSSCG00000024666 (pp) IPECJ2_ENSSSCG00000025928	Intra	0.956044	1	9.46978e-08	9305.5	0.956044	FXYD domain containing ion transport regulator 3 [Source:HGNC Symbol;Acc:HGNC:4027]	ribosomal protein L18 [Source:HGNC Symbol;Acc:HGNC:10310]
IPECJ2_ENSSSCG00000016098 (pp) IPECJ2_XLOC_010223	Intra	0.978022	1	1.55196e-09	26153.5	0.978022	Unknown	Uncharacterized protein OS=Sus scrofa GN=AGFG1 PE=1 SV=1
IPECJ2_ENSSSCG00000024666 (pp) IPECJ2_ENSSSCG00000023110	Intra	0.951648	1	1.66161e-07	3309.5	0.951648	FXYD domain containing ion transport regulator 3 [Source:HGNC Symbol;Acc:HGNC:4027]	UBX domain protein 1 [Source:HGNC Symbol;Acc:HGNC:18402]
IPECJ2_ENSSSCG00000024666 (pp) IPECJ2_ENSSSCG00000029362	Intra	0.951648	1	1.66161e-07	3309.5	0.951648	FXYD domain containing ion transport regulator 3 [Source:HGNC Symbol;Acc:HGNC:4027]	charged multivesicular body protein 2A [Source:HGNC Symbol;Acc:HGNC:30216]
IPECJ2_ENSSSCG00000024666 (pp) IPECJ2_ENSSSCG00000003772	Intra	0.951648	-1	1.66161e-07	3309.5	-0.951648	FXYD domain containing ion transport regulator 3 [Source:HGNC Symbol;Acc:HGNC:4027]	zinc finger ZZ-type containing 3 [Source:HGNC Symbol;Acc:HGNC:24523]
IPECJ2_ENSSSCG00000024666 (pp) IPECJ2_ENSSSCG00000007472	Intra	0.951648	1	1.66161e-07	3309.5	0.951648	FXYD domain containing ion transport regulator 3 [Source:HGNC Symbol;Acc:HGNC:4027]	breast carcinoma amplified sequence 4 [Source:HGNC Symbol;Acc:HGNC:14367]
IPECJ2_ENSSSCG00000016098 (pp) IPECJ2_ENSSSCG00000021825	Intra	0.964835	-1	5.02606e-06	18397.5	-0.964835	Unknown	40S ribosomal protein S21 [Source:UniProtKB/Swiss-Prot;Acc:P63221]
IPECJ2_ENSSSCG00000008105 (pp) AscL3_gene_GS_24029	Inter	0.956044	-1	1.04633e-05	9305.5	-0.956044	Unknown	1,2-dihydroxy-3-keto-5-methylthiopentene dioxygenase homolog OS=Ascaris suum GN=ASU_02170 PE=3 SV=1
IPECJ2_ENSSSCG00000016098 (pp) IPECJ2_XLOC_011183	Intra	0.96044	-1	5.08105e-08	14245.5	-0.96044	Unknown	Inosine triphosphate pyrophosphatase OS=Bos taurus GN=ITPA PE=2 SV=1
IPECJ2_ENSSSCG00000016098 (pp) IPECJ2_ENSSSCG00000027353	Intra	0.951648	-1	1.66161e-07	3309.5	-0.951648	Unknown	Unknown
IPECJ2_ENSSSCG00000016098 (pp) IPECJ2_ENSSSCG00000019018	Intra	0.951648	-1	1.66161e-07	3309.5	-0.951648	Unknown	Unknown
IPECJ2_ENSSSCG00000004639 (pp) IPECJ2_ENSSSCG00000011213	Intra	0.96044	1	5.08105e-08	14245.5	0.96044	ubiquitin specific peptidase 8 [Source:HGNC Symbol;Acc:HGNC:12631]	topoisomerase (DNA) II beta 180kDa [Source:RefSeq peptide;Acc:NP_001245315]
IPECJ2_ENSSSCG00000004639 (pp) AscL3_gene_L3E_01572	Inter	0.956044	1	1.04633e-05	9305.5	0.956044	ubiquitin specific peptidase 8 [Source:HGNC Symbol;Acc:HGNC:12631]	Bm1034 OS=Brugia malayi GN=Bm1034 PE=4 SV=1
IPECJ2_ENSSSCG00000004639 (pp) IPECJ2_ENSSSCG00000003464	Intra	0.969231	1	1.14652e-08	21732.5	0.969231	ubiquitin specific peptidase 8 [Source:HGNC Symbol;Acc:HGNC:12631]	DnaJ heat shock protein family (Hsp40) member C16 [Source:HGNC Symbol;Acc:HGNC:29157]
IPECJ2_ENSSSCG00000004639 (pp) AscL3_XLOC_021500	Inter	0.964835	-1	5.02606e-06	18397.5	-0.964835	ubiquitin specific peptidase 8 [Source:HGNC Symbol;Acc:HGNC:12631]	Unknown
IPECJ2_ENSSSCG00000016196 (pp) AscL3_gene_GS_02917	Inter	0.951648	1	1.41528e-05	3309.5	0.951648	villin 1 [Source:HGNC Symbol;Acc:HGNC:12690]	Uncharacterized protein OS=Ascaris suum GN=ASU_02373 PE=4 SV=1
IPECJ2_ENSSSCG00000024974 (pp) IPECJ2_ENSSSCG00000019018	Intra	0.995604	1	2.81634e-09	28836.5	0.995604	ribosomal protein L13 [Source:HGNC Symbol;Acc:HGNC:10303]	Unknown
IPECJ2_ENSSSCG00000024974 (pp) IPECJ2_ENSSSCG00000027353	Intra	0.986813	1	7.37952e-11	28223.5	0.986813	ribosomal protein L13 [Source:HGNC Symbol;Acc:HGNC:10303]	Unknown
IPECJ2_ENSSSCG00000024974 (pp) IPECJ2_ENSSSCG00000021825	Intra	0.982418	1	5.27924e-07	27446.5	0.982418	ribosomal protein L13 [Source:HGNC Symbol;Acc:HGNC:10303]	40S ribosomal protein S21 [Source:UniProtKB/Swiss-Prot;Acc:P63221]
IPECJ2_ENSSSCG00000024974 (pp) IPECJ2_ENSSSCG00000027971	Intra	0.986813	1	7.37952e-11	28223.5	0.986813	ribosomal protein L13 [Source:HGNC Symbol;Acc:HGNC:10303]	regulatory factor X associated ankyrin containing protein [Source:HGNC Symbol;Acc:HGNC:9987]
IPECJ2_ENSSSCG00000024974 (pp) IPECJ2_XLOC_029898	Intra	0.986813	1	7.37952e-11	28223.5	0.986813	ribosomal protein L13 [Source:HGNC Symbol;Acc:HGNC:10303]	Proteasome subunit beta type-7 OS=Sus scrofa GN=PSMB7 PE=2 SV=2
IPECJ2_ENSSSCG00000016395 (pp) IPECJ2_ENSSSCG00000004970	Intra	0.973626	-1	1.97568e-06	24252.5	-0.973626	replication timing regulatory factor 1 [Source:HGNC Symbol;Acc:HGNC:23207]	Unknown
IPECJ2_ENSSSCG00000016395 (pp) IPECJ2_ENSSSCG00000010063	Intra	0.969231	-1	3.28443e-06	21732.5	-0.969231	replication timing regulatory factor 1 [Source:HGNC Symbol;Acc:HGNC:23207]	Macrophage migration inhibitory factor OS=Sus scrofa GN=MIF PE=1 SV=3
IPECJ2_ENSSSCG00000024974 (pp) IPECJ2_XLOC_011183	Intra	0.964835	1	2.53041e-08	18397.5	0.964835	ribosomal protein L13 [Source:HGNC Symbol;Acc:HGNC:10303]	Inosine triphosphate pyrophosphatase OS=Bos taurus GN=ITPA PE=2 SV=1
IPECJ2_ENSSSCG00000024974 (pp) IPECJ2_ENSSSCG00000014076	Intra	0.964835	-1	5.02606e-06	18397.5	-0.964835	ribosomal protein L13 [Source:HGNC Symbol;Acc:HGNC:10303]	Isoform 2 of Soluble lamin-associated protein of 75 kDa OS=Homo sapiens GN=FAM169A
IPECJ2_ENSSSCG00000016395 (pp) IPECJ2_XLOC_007562	Intra	0.973626	-1	1.97568e-06	24252.5	-0.973626	replication timing regulatory factor 1 [Source:HGNC Symbol;Acc:HGNC:23207]	Unknown
IPECJ2_ENSSSCG00000024974 (pp) IPECJ2_ENSSSCG00000017308	Intra	0.951648	-1	1.66161e-07	3309.5	-0.951648	ribosomal protein L13 [Source:HGNC Symbol;Acc:HGNC:10303]	cell division cycle 27 [Source:HGNC Symbol;Acc:HGNC:1728]
IPECJ2_ENSSSCG00000016395 (pp) IPECJ2_ENSSSCG00000026812	Intra	0.96044	-1	7.40017e-06	14245.5	-0.96044	replication timing regulatory factor 1 [Source:HGNC Symbol;Acc:HGNC:23207]	Unknown
IPECJ2_ENSSSCG00000016395 (pp) IPECJ2_ENSSSCG00000000061	Intra	0.956044	-1	1.04633e-05	9305.5	-0.956044	replication timing regulatory factor 1 [Source:HGNC Symbol;Acc:HGNC:23207]	phosphomannomutase 1 [Source:HGNC Symbol;Acc:HGNC:9114]
IPECJ2_ENSSSCG00000000921 (pp) IPECJ2_XLOC_011183	Intra	0.986813	-1	1.88722e-07	28223.5	-0.986813	Unknown	Inosine triphosphate pyrophosphatase OS=Bos taurus GN=ITPA PE=2 SV=1
IPECJ2_ENSSSCG00000016395 (pp) IPECJ2_ENSSSCG00000026914	Intra	0.964835	-1	5.02606e-06	18397.5	-0.964835	replication timing regulatory factor 1 [Source:HGNC Symbol;Acc:HGNC:23207]	phospholipase A2 group XVI [Source:HGNC Symbol;Acc:HGNC:17825]
IPECJ2_ENSSSCG00000024984 (pp) IPECJ2_ENSSSCG00000024666	Intra	0.96044	1	7.40017e-06	14245.5	0.96044	Unknown	FXYD domain containing ion transport regulator 3 [Source:HGNC Symbol;Acc:HGNC:4027]
IPECJ2_ENSSSCG00000016395 (pp) IPECJ2_ENSSSCG00000031053	Intra	0.951648	-1	1.41528e-05	3309.5	-0.951648	replication timing regulatory factor 1 [Source:HGNC Symbol;Acc:HGNC:23207]	Unknown
IPECJ2_ENSSSCG00000000921 (pp) IPECJ2_ENSSSCG00000021825	Intra	0.978022	-1	1.07614e-06	26153.5	-0.978022	Unknown	40S ribosomal protein S21 [Source:UniProtKB/Swiss-Prot;Acc:P63221]
IPECJ2_ENSSSCG00000016395 (pp) IPECJ2_XLOC_000015	Intra	0.951648	-1	1.41528e-05	3309.5	-0.951648	replication timing regulatory factor 1 [Source:HGNC Symbol;Acc:HGNC:23207]	Mitochondrial pyruvate carrier 1 OS=Bos taurus GN=MPC1 PE=1 SV=1
IPECJ2_ENSSSCG00000000921 (pp) IPECJ2_ENSSSCG00000010631	Intra	0.982418	1	4.10718e-10	27446.5	0.982418	Unknown	glycerol-3-phosphate acyltransferase, mitochondrial [Source:HGNC Symbol;Acc:HGNC:24865]
IPECJ2_ENSSSCG00000024984 (pp) IPECJ2_ENSSSCG00000008600	Intra	0.978022	-1	1.07614e-06	26153.5	-0.978022	Unknown	pumilio RNA binding family member 2 [Source:HGNC Symbol;Acc:HGNC:14958]
IPECJ2_ENSSSCG00000016395 (pp) IPECJ2_ENSSSCG00000024974	Intra	0.951648	-1	1.41528e-05	3309.5	-0.951648	replication timing regulatory factor 1 [Source:HGNC Symbol;Acc:HGNC:23207]	ribosomal protein L13 [Source:HGNC Symbol;Acc:HGNC:10303]
IPECJ2_ENSSSCG00000031053 (pp) IPECJ2_XLOC_000015	Intra	0.978022	1	1.55196e-09	26153.5	0.978022	Unknown	Mitochondrial pyruvate carrier 1 OS=Bos taurus GN=MPC1 PE=1 SV=1
IPECJ2_ENSSSCG00000024984 (pp) IPECJ2_XLOC_023587	Intra	0.956044	1	9.46978e-08	9305.5	0.956044	Unknown	IL-23 (Fragment) OS=Sus scrofa PE=2 SV=1
IPECJ2_ENSSSCG00000000921 (pp) IPECJ2_ENSSSCG00000020790	Intra	0.973626	-1	1.97568e-06	24252.5	-0.973626	Unknown	Uncharacterized protein OS=Sus scrofa GN=MYEOV2 PE=1 SV=1
IPECJ2_ENSSSCG00000000921 (pp) IPECJ2_ENSSSCG00000004970	Intra	0.964835	-1	5.02606e-06	18397.5	-0.964835	Unknown	Unknown
IPECJ2_ENSSSCG00000000921 (pp) IPECJ2_ENSSSCG00000027971	Intra	0.969231	-1	1.14652e-08	21732.5	-0.969231	Unknown	regulatory factor X associated ankyrin containing protein [Source:HGNC Symbol;Acc:HGNC:9987]
IPECJ2_ENSSSCG00000000921 (pp) IPECJ2_XLOC_010959	Intra	0.969231	1	3.28443e-06	21732.5	0.969231	Unknown	Unknown
IPECJ2_ENSSSCG00000000921 (pp) IPECJ2_ENSSSCG00000026812	Intra	0.96044	-1	7.40017e-06	14245.5	-0.96044	Unknown	Unknown
IPECJ2_ENSSSCG00000000921 (pp) IPECJ2_ENSSSCG00000012784	Intra	0.96044	-1	7.40017e-06	14245.5	-0.96044	Unknown	signal sequence receptor subunit 4 [Source:HGNC Symbol;Acc:HGNC:11326]
IPECJ2_ENSSSCG00000000921 (pp) IPECJ2_ENSSSCG00000024974	Intra	0.956044	-1	1.04633e-05	9305.5	-0.956044	Unknown	ribosomal protein L13 [Source:HGNC Symbol;Acc:HGNC:10303]
IPECJ2_XLOC_000015 (pp) IPECJ2_ENSSSCG00000010063	Intra	0.956044	1	1.04633e-05	9305.5	0.956044	Mitochondrial pyruvate carrier 1 OS=Bos taurus GN=MPC1 PE=1 SV=1	Macrophage migration inhibitory factor OS=Sus scrofa GN=MIF PE=1 SV=3
IPECJ2_ENSSSCG00000000921 (pp) IPECJ2_ENSSSCG00000007646	Intra	0.956044	-1	1.04633e-05	9305.5	-0.956044	Unknown	late endosomal/lysosomal adaptor, MAPK and MTOR activator 4 [Source:HGNC Symbol;Acc:HGNC:33772]
IPECJ2_ENSSSCG00000008412 (pp) IPECJ2_ENSSSCG00000002502	Intra	0.964835	1	5.02606e-06	18397.5	0.964835	proteasome activator subunit 4 [Source:HGNC Symbol;Acc:HGNC:20635]	autophagy related 2B [Source:HGNC Symbol;Acc:HGNC:20187]
IPECJ2_ENSSSCG00000000921 (pp) IPECJ2_ENSSSCG00000010063	Intra	0.951648	-1	1.66161e-07	3309.5	-0.951648	Unknown	Macrophage migration inhibitory factor OS=Sus scrofa GN=MIF PE=1 SV=3
IPECJ2_ENSSSCG00000008412 (pp) IPECJ2_ENSSSCG00000009217	Intra	0.973626	1	4.59028e-09	24252.5	0.973626	proteasome activator subunit 4 [Source:HGNC Symbol;Acc:HGNC:20635]	polycystin 2, transient receptor potential cation channel [Source:HGNC Symbol;Acc:HGNC:9009]
IPECJ2_ENSSSCG00000000921 (pp) IPECJ2_ENSSSCG00000012965	Intra	0.951648	-1	1.41528e-05	3309.5	-0.951648	Unknown	DR1 associated protein 1 [Source:HGNC Symbol;Acc:HGNC:3019]
IPECJ2_ENSSSCG00000008412 (pp) IPECJ2_ENSSSCG00000024984	Intra	0.956044	-1	1.04633e-05	9305.5	-0.956044	proteasome activator subunit 4 [Source:HGNC Symbol;Acc:HGNC:20635]	Unknown
IPECJ2_ENSSSCG00000008412 (pp) IPECJ2_ENSSSCG00000025284	Intra	0.956044	-1	9.46978e-08	9305.5	-0.956044	proteasome activator subunit 4 [Source:HGNC Symbol;Acc:HGNC:20635]	coenzyme Q9 [Source:HGNC Symbol;Acc:HGNC:25302]
IPECJ2_ENSSSCG00000000921 (pp) IPECJ2_ENSSSCG00000019018	Intra	0.951648	-1	1.41528e-05	3309.5	-0.951648	Unknown	Unknown
IPECJ2_ENSSSCG00000016835 (pp) IPECJ2_ENSSSCG00000003080	Intra	0.964835	-1	5.02606e-06	18397.5	-0.964835	S-phase kinase-associated protein 2, E3 ubiquitin protein ligase [Source:HGNC Symbol;Acc:HGNC:10901]	immunoglobulin superfamily member 23 [Source:HGNC Symbol;Acc:HGNC:40040]
IPECJ2_ENSSSCG00000016835 (pp) IPECJ2_ENSSSCG00000015786	Intra	0.978022	1	1.55196e-09	26153.5	0.978022	S-phase kinase-associated protein 2, E3 ubiquitin protein ligase [Source:HGNC Symbol;Acc:HGNC:10901]	Unknown
IPECJ2_ENSSSCG00000016835 (pp) IPECJ2_ENSSSCG00000022867	Intra	0.96044	-1	5.08105e-08	14245.5	-0.96044	S-phase kinase-associated protein 2, E3 ubiquitin protein ligase [Source:HGNC Symbol;Acc:HGNC:10901]	Unknown
IPECJ2_ENSSSCG00000011825 (pp) IPECJ2_ENSSSCG00000016098	Intra	0.969231	1	3.28443e-06	21732.5	0.969231	ATPase 13A3 [Source:HGNC Symbol;Acc:HGNC:24113]	Unknown
IPECJ2_ENSSSCG00000016835 (pp) IPECJ2_ENSSSCG00000025928	Intra	0.956044	-1	9.46978e-08	9305.5	-0.956044	S-phase kinase-associated protein 2, E3 ubiquitin protein ligase [Source:HGNC Symbol;Acc:HGNC:10901]	ribosomal protein L18 [Source:HGNC Symbol;Acc:HGNC:10310]
IPECJ2_ENSSSCG00000011825 (pp) IPECJ2_XLOC_010223	Intra	0.969231	1	1.14652e-08	21732.5	0.969231	ATPase 13A3 [Source:HGNC Symbol;Acc:HGNC:24113]	Uncharacterized protein OS=Sus scrofa GN=AGFG1 PE=1 SV=1
IPECJ2_ENSSSCG00000016835 (pp) IPECJ2_ENSSSCG00000014283	Intra	0.964835	1	5.02606e-06	18397.5	0.964835	S-phase kinase-associated protein 2, E3 ubiquitin protein ligase [Source:HGNC Symbol;Acc:HGNC:10901]	kinesin family member 3A [Source:HGNC Symbol;Acc:HGNC:6319]
IPECJ2_ENSSSCG00000011825 (pp) IPECJ2_ENSSSCG00000024180	Intra	0.964835	1	5.02606e-06	18397.5	0.964835	ATPase 13A3 [Source:HGNC Symbol;Acc:HGNC:24113]	peripherial benzodiazepine receptor associated protein [Source:RefSeq peptide;Acc:NP_001009581]
IPECJ2_ENSSSCG00000016835 (pp) IPECJ2_ENSSSCG00000013267	Intra	0.951648	-1	1.66161e-07	3309.5	-0.951648	S-phase kinase-associated protein 2, E3 ubiquitin protein ligase [Source:HGNC Symbol;Acc:HGNC:10901]	peroxisomal biogenesis factor 16 [Source:HGNC Symbol;Acc:HGNC:8857]
IPECJ2_ENSSSCG00000016835 (pp) IPECJ2_ENSSSCG00000029034	Intra	0.956044	-1	9.46978e-08	9305.5	-0.956044	S-phase kinase-associated protein 2, E3 ubiquitin protein ligase [Source:HGNC Symbol;Acc:HGNC:10901]	cytochrome c oxidase subunit 4I1 [Source:HGNC Symbol;Acc:HGNC:2265]
IPECJ2_ENSSSCG00000011825 (pp) IPECJ2_XLOC_011183	Intra	0.96044	-1	7.40017e-06	14245.5	-0.96044	ATPase 13A3 [Source:HGNC Symbol;Acc:HGNC:24113]	Inosine triphosphate pyrophosphatase OS=Bos taurus GN=ITPA PE=2 SV=1
IPECJ2_ENSSSCG00000011825 (pp) IPECJ2_ENSSSCG00000001922	Intra	0.951648	1	1.41528e-05	3309.5	0.951648	ATPase 13A3 [Source:HGNC Symbol;Acc:HGNC:24113]	ariadne RBR E3 ubiquitin protein ligase 1 [Source:HGNC Symbol;Acc:HGNC:689]
IPECJ2_ENSSSCG00000025258 (pp) IPECJ2_ENSSSCG00000012727	Intra	0.973626	-1	1.97568e-06	24252.5	-0.973626	Unknown	fragile X mental retardation 1 [Source:HGNC Symbol;Acc:HGNC:3775]
IPECJ2_ENSSSCG00000025258 (pp) AscL3_gene_GS_12056	Inter	0.956044	1	1.04633e-05	9305.5	0.956044	Unknown	Elongation of very long chain fatty acids protein OS=Ascaris suum GN=ASU_11627 PE=3 SV=1
IPECJ2_ENSSSCG00000025258 (pp) IPECJ2_ENSSSCG00000012965	Intra	0.951648	1	1.41528e-05	3309.5	0.951648	Unknown	DR1 associated protein 1 [Source:HGNC Symbol;Acc:HGNC:3019]
IPECJ2_ENSSSCG00000011825 (pp) IPECJ2_ENSSSCG00000014076	Intra	0.951648	1	1.41528e-05	3309.5	0.951648	ATPase 13A3 [Source:HGNC Symbol;Acc:HGNC:24113]	Isoform 2 of Soluble lamin-associated protein of 75 kDa OS=Homo sapiens GN=FAM169A
IPECJ2_ENSSSCG00000025258 (pp) IPECJ2_ENSSSCG00000026812	Intra	0.951648	1	1.41528e-05	3309.5	0.951648	Unknown	Unknown
IPECJ2_ENSSSCG00000025258 (pp) IPECJ2_ENSSSCG00000026914	Intra	0.951648	1	1.41528e-05	3309.5	0.951648	Unknown	phospholipase A2 group XVI [Source:HGNC Symbol;Acc:HGNC:17825]
IPECJ2_ENSSSCG00000011825 (pp) IPECJ2_XLOC_010959	Intra	0.951648	1	1.66161e-07	3309.5	0.951648	ATPase 13A3 [Source:HGNC Symbol;Acc:HGNC:24113]	Unknown
IPECJ2_ENSSSCG00000025258 (pp) IPECJ2_ENSSSCG00000013619	Intra	0.951648	1	1.41528e-05	3309.5	0.951648	Unknown	SWIM-type zinc finger 7 associated protein 1 [Source:HGNC Symbol;Acc:HGNC:26638]
IPECJ2_ENSSSCG00000025258 (pp) IPECJ2_ENSSSCG00000022647	Intra	0.951648	1	1.41528e-05	3309.5	0.951648	Unknown	translocase of inner mitochondrial membrane 17 homolog B (yeast) [Source:HGNC Symbol;Acc:HGNC:17310]
IPECJ2_ENSSSCG00000025258 (pp) IPECJ2_ENSSSCG00000027840	Intra	0.951648	1	1.66161e-07	3309.5	0.951648	Unknown	Unknown
IPECJ2_ENSSSCG00000011857 (pp) IPECJ2_ENSSSCG00000015972	Intra	0.991209	1	4.46942e-08	28659.5	0.991209	leishmanolysin like peptidase [Source:HGNC Symbol;Acc:HGNC:15991]	Unknown
IPECJ2_ENSSSCG00000011857 (pp) IPECJ2_ENSSSCG00000003727	Intra	0.973626	1	1.97568e-06	24252.5	0.973626	leishmanolysin like peptidase [Source:HGNC Symbol;Acc:HGNC:15991]	Isoform 2 of Trafficking protein particle complex subunit 8 OS=Homo sapiens GN=TRAPPC8
IPECJ2_ENSSSCG00000011857 (pp) IPECJ2_ENSSSCG00000017673	Intra	0.964835	1	5.02606e-06	18397.5	0.964835	leishmanolysin like peptidase [Source:HGNC Symbol;Acc:HGNC:15991]	integrator complex subunit 2 [Source:HGNC Symbol;Acc:HGNC:29241]
IPECJ2_ENSSSCG00000011857 (pp) IPECJ2_ENSSSCG00000008600	Intra	0.951648	1	1.41528e-05	3309.5	0.951648	leishmanolysin like peptidase [Source:HGNC Symbol;Acc:HGNC:15991]	pumilio RNA binding family member 2 [Source:HGNC Symbol;Acc:HGNC:14958]
IPECJ2_ENSSSCG00000001423 (pp) IPECJ2_ENSSSCG00000013267	Intra	0.991209	1	4.46942e-08	28659.5	0.991209	negative elongation factor complex member E [Source:HGNC Symbol;Acc:HGNC:13974]	peroxisomal biogenesis factor 16 [Source:HGNC Symbol;Acc:HGNC:8857]
IPECJ2_ENSSSCG00000001423 (pp) IPECJ2_ENSSSCG00000025928	Intra	0.986813	1	1.88722e-07	28223.5	0.986813	negative elongation factor complex member E [Source:HGNC Symbol;Acc:HGNC:13974]	ribosomal protein L18 [Source:HGNC Symbol;Acc:HGNC:10310]
IPECJ2_ENSSSCG00000025284 (pp) IPECJ2_ENSSSCG00000002502	Intra	0.982418	-1	5.27924e-07	27446.5	-0.982418	coenzyme Q9 [Source:HGNC Symbol;Acc:HGNC:25302]	autophagy related 2B [Source:HGNC Symbol;Acc:HGNC:20187]
IPECJ2_ENSSSCG00000001423 (pp) IPECJ2_ENSSSCG00000029034	Intra	0.986813	1	1.88722e-07	28223.5	0.986813	negative elongation factor complex member E [Source:HGNC Symbol;Acc:HGNC:13974]	cytochrome c oxidase subunit 4I1 [Source:HGNC Symbol;Acc:HGNC:2265]
IPECJ2_ENSSSCG00000001423 (pp) IPECJ2_ENSSSCG00000027840	Intra	0.991209	1	4.46942e-08	28659.5	0.991209	negative elongation factor complex member E [Source:HGNC Symbol;Acc:HGNC:13974]	Unknown
IPECJ2_ENSSSCG00000001423 (pp) IPECJ2_ENSSSCG00000007472	Intra	0.986813	1	1.88722e-07	28223.5	0.986813	negative elongation factor complex member E [Source:HGNC Symbol;Acc:HGNC:13974]	breast carcinoma amplified sequence 4 [Source:HGNC Symbol;Acc:HGNC:14367]
IPECJ2_ENSSSCG00000001423 (pp) IPECJ2_ENSSSCG00000029830	Intra	0.982418	1	5.27924e-07	27446.5	0.982418	negative elongation factor complex member E [Source:HGNC Symbol;Acc:HGNC:13974]	ribosomal protein L8 [Source:HGNC Symbol;Acc:HGNC:10368]
IPECJ2_ENSSSCG00000001423 (pp) IPECJ2_ENSSSCG00000001884	Intra	0.978022	1	1.07614e-06	26153.5	0.978022	negative elongation factor complex member E [Source:HGNC Symbol;Acc:HGNC:13974]	COMM domain containing 4 [Source:HGNC Symbol;Acc:HGNC:26027]
IPECJ2_ENSSSCG00000001423 (pp) IPECJ2_ENSSSCG00000029161	Intra	0.986813	1	7.37952e-11	28223.5	0.986813	negative elongation factor complex member E [Source:HGNC Symbol;Acc:HGNC:13974]	acireductone dioxygenase 1 [Source:HGNC Symbol;Acc:HGNC:30576]
IPECJ2_ENSSSCG00000001423 (pp) IPECJ2_ENSSSCG00000006777	Intra	0.982418	1	5.27924e-07	27446.5	0.982418	negative elongation factor complex member E [Source:HGNC Symbol;Acc:HGNC:13974]	ras homolog family member C [Source:HGNC Symbol;Acc:HGNC:669]
IPECJ2_ENSSSCG00000001423 (pp) IPECJ2_ENSSSCG00000029362	Intra	0.978022	1	1.07614e-06	26153.5	0.978022	negative elongation factor complex member E [Source:HGNC Symbol;Acc:HGNC:13974]	charged multivesicular body protein 2A [Source:HGNC Symbol;Acc:HGNC:30216]
IPECJ2_ENSSSCG00000001423 (pp) IPECJ2_ENSSSCG00000012727	Intra	0.973626	-1	1.97568e-06	24252.5	-0.973626	negative elongation factor complex member E [Source:HGNC Symbol;Acc:HGNC:13974]	fragile X mental retardation 1 [Source:HGNC Symbol;Acc:HGNC:3775]
IPECJ2_ENSSSCG00000001423 (pp) IPECJ2_ENSSSCG00000012965	Intra	0.978022	1	1.07614e-06	26153.5	0.978022	negative elongation factor complex member E [Source:HGNC Symbol;Acc:HGNC:13974]	DR1 associated protein 1 [Source:HGNC Symbol;Acc:HGNC:3019]
IPECJ2_ENSSSCG00000025284 (pp) IPECJ2_ENSSSCG00000002646	Intra	0.951648	1	1.41528e-05	3309.5	0.951648	coenzyme Q9 [Source:HGNC Symbol;Acc:HGNC:25302]	trafficking protein particle complex 2 like [Source:HGNC Symbol;Acc:HGNC:30887]
IPECJ2_ENSSSCG00000001423 (pp) IPECJ2_ENSSSCG00000020817	Intra	0.978022	1	1.07614e-06	26153.5	0.978022	negative elongation factor complex member E [Source:HGNC Symbol;Acc:HGNC:13974]	40S ribosomal protein S16 [Source:UniProtKB/Swiss-Prot;Acc:Q29201]
IPECJ2_ENSSSCG00000001423 (pp) IPECJ2_ENSSSCG00000012842	Intra	0.969231	1	3.28443e-06	21732.5	0.969231	negative elongation factor complex member E [Source:HGNC Symbol;Acc:HGNC:13974]	Unknown
IPECJ2_ENSSSCG00000011862 (pp) IPECJ2_ENSSSCG00000025293	Intra	0.969231	-1	1.14652e-08	21732.5	-0.969231	mucin-13 [Source:RefSeq peptide;Acc:NP_001098763]	helicase like transcription factor [Source:HGNC Symbol;Acc:HGNC:11099]
IPECJ2_ENSSSCG00000001423 (pp) IPECJ2_ENSSSCG00000012784	Intra	0.973626	1	1.97568e-06	24252.5	0.973626	negative elongation factor complex member E [Source:HGNC Symbol;Acc:HGNC:13974]	signal sequence receptor subunit 4 [Source:HGNC Symbol;Acc:HGNC:11326]
IPECJ2_ENSSSCG00000001423 (pp) IPECJ2_ENSSSCG00000026812	Intra	0.964835	1	5.02606e-06	18397.5	0.964835	negative elongation factor complex member E [Source:HGNC Symbol;Acc:HGNC:13974]	Unknown
IPECJ2_ENSSSCG00000011874 (pp) IPECJ2_ENSSSCG00000025820	Intra	0.956044	1	1.04633e-05	9305.5	0.956044	poly(ADP-ribose) polymerase family member 14 [Source:HGNC Symbol;Acc:HGNC:29232]	solute carrier family 15 member 4 [Source:HGNC Symbol;Acc:HGNC:23090]
IPECJ2_ENSSSCG00000001423 (pp) IPECJ2_ENSSSCG00000007160	Intra	0.96044	1	7.40017e-06	14245.5	0.96044	negative elongation factor complex member E [Source:HGNC Symbol;Acc:HGNC:13974]	DDRGK domain containing 1 [Source:HGNC Symbol;Acc:HGNC:16110]
IPECJ2_ENSSSCG00000025293 (pp) IPECJ2_ENSSSCG00000031053	Intra	0.964835	-1	5.02606e-06	18397.5	-0.964835	helicase like transcription factor [Source:HGNC Symbol;Acc:HGNC:11099]	Unknown
IPECJ2_ENSSSCG00000001423 (pp) IPECJ2_ENSSSCG00000027971	Intra	0.969231	1	1.14652e-08	21732.5	0.969231	negative elongation factor complex member E [Source:HGNC Symbol;Acc:HGNC:13974]	regulatory factor X associated ankyrin containing protein [Source:HGNC Symbol;Acc:HGNC:9987]
IPECJ2_ENSSSCG00000001423 (pp) IPECJ2_ENSSSCG00000007646	Intra	0.964835	1	5.02606e-06	18397.5	0.964835	negative elongation factor complex member E [Source:HGNC Symbol;Acc:HGNC:13974]	late endosomal/lysosomal adaptor, MAPK and MTOR activator 4 [Source:HGNC Symbol;Acc:HGNC:33772]
IPECJ2_ENSSSCG00000001423 (pp) IPECJ2_ENSSSCG00000020790	Intra	0.956044	1	1.04633e-05	9305.5	0.956044	negative elongation factor complex member E [Source:HGNC Symbol;Acc:HGNC:13974]	Uncharacterized protein OS=Sus scrofa GN=MYEOV2 PE=1 SV=1
IPECJ2_ENSSSCG00000001423 (pp) IPECJ2_ENSSSCG00000012960	Intra	0.96044	1	7.40017e-06	14245.5	0.96044	negative elongation factor complex member E [Source:HGNC Symbol;Acc:HGNC:13974]	cystatin E/M [Source:HGNC Symbol;Acc:HGNC:2478]
IPECJ2_ENSSSCG00000001423 (pp) IPECJ2_ENSSSCG00000027308	Intra	0.956044	1	1.04633e-05	9305.5	0.956044	negative elongation factor complex member E [Source:HGNC Symbol;Acc:HGNC:13974]	Unknown
IPECJ2_ENSSSCG00000001423 (pp) IPECJ2_XLOC_029898	Intra	0.951648	1	1.41528e-05	3309.5	0.951648	negative elongation factor complex member E [Source:HGNC Symbol;Acc:HGNC:13974]	Proteasome subunit beta type-7 OS=Sus scrofa GN=PSMB7 PE=2 SV=2
IPECJ2_ENSSSCG00000001423 (pp) IPECJ2_ENSSSCG00000023139	Intra	0.956044	1	1.04633e-05	9305.5	0.956044	negative elongation factor complex member E [Source:HGNC Symbol;Acc:HGNC:13974]	Isoform 2 of Methyltransferase-like protein 23 OS=Homo sapiens GN=METTL23
IPECJ2_ENSSSCG00000001423 (pp) IPECJ2_ENSSSCG00000024974	Intra	0.956044	1	1.04633e-05	9305.5	0.956044	negative elongation factor complex member E [Source:HGNC Symbol;Acc:HGNC:13974]	ribosomal protein L13 [Source:HGNC Symbol;Acc:HGNC:10303]
IPECJ2_ENSSSCG00000008583 (pp) IPECJ2_ENSSSCG00000025868	Intra	0.964835	-1	2.53041e-08	18397.5	-0.964835	intersectin 2 [Source:HGNC Symbol;Acc:HGNC:6184]	Unknown
IPECJ2_ENSSSCG00000008583 (pp) IPECJ2_ENSSSCG00000029855	Intra	0.964835	-1	2.53041e-08	18397.5	-0.964835	intersectin 2 [Source:HGNC Symbol;Acc:HGNC:6184]	lipoma HMGIC fusion partner [Source:HGNC Symbol;Acc:HGNC:6586]
IPECJ2_ENSSSCG00000008583 (pp) IPECJ2_ENSSSCG00000011213	Intra	0.964835	1	2.53041e-08	18397.5	0.964835	intersectin 2 [Source:HGNC Symbol;Acc:HGNC:6184]	topoisomerase (DNA) II beta 180kDa [Source:RefSeq peptide;Acc:NP_001245315]
IPECJ2_ENSSSCG00000008583 (pp) IPECJ2_ENSSSCG00000023325	Intra	0.964835	-1	5.02606e-06	18397.5	-0.964835	intersectin 2 [Source:HGNC Symbol;Acc:HGNC:6184]	Aminoacylase-1 [Source:UniProtKB/Swiss-Prot;Acc:P37111]
IPECJ2_ENSSSCG00000008583 (pp) IPECJ2_ENSSSCG00000001884	Intra	0.956044	-1	9.46978e-08	9305.5	-0.956044	intersectin 2 [Source:HGNC Symbol;Acc:HGNC:6184]	COMM domain containing 4 [Source:HGNC Symbol;Acc:HGNC:26027]
IPECJ2_ENSSSCG00000008583 (pp) AscL3_gene_GS_09942	Inter	0.951648	1	1.41528e-05	3309.5	0.951648	intersectin 2 [Source:HGNC Symbol;Acc:HGNC:6184]	Sperm-specific protein OS=Ascaris suum GN=ASU_04668 PE=4 SV=1
IPECJ2_ENSSSCG00000008583 (pp) IPECJ2_ENSSSCG00000012905	Intra	0.96044	-1	7.40017e-06	14245.5	-0.96044	intersectin 2 [Source:HGNC Symbol;Acc:HGNC:6184]	transmembrane protein 134 [Source:HGNC Symbol;Acc:HGNC:26142]
IPECJ2_ENSSSCG00000008583 (pp) IPECJ2_ENSSSCG00000024254	Intra	0.96044	-1	5.08105e-08	14245.5	-0.96044	intersectin 2 [Source:HGNC Symbol;Acc:HGNC:6184]	alkB homolog 7 [Source:HGNC Symbol;Acc:HGNC:21306]
IPECJ2_ENSSSCG00000008583 (pp) IPECJ2_ENSSSCG00000022867	Intra	0.951648	-1	1.66161e-07	3309.5	-0.951648	intersectin 2 [Source:HGNC Symbol;Acc:HGNC:6184]	Unknown
IPECJ2_ENSSSCG00000011953 (pp) IPECJ2_ENSSSCG00000025820	Intra	0.982418	1	4.10718e-10	27446.5	0.982418	zinc finger and BTB domain containing 11 [Source:HGNC Symbol;Acc:HGNC:16740]	solute carrier family 15 member 4 [Source:HGNC Symbol;Acc:HGNC:23090]
IPECJ2_ENSSSCG00000008600 (pp) IPECJ2_XLOC_023587	Intra	0.973626	-1	4.59028e-09	24252.5	-0.973626	pumilio RNA binding family member 2 [Source:HGNC Symbol;Acc:HGNC:14958]	IL-23 (Fragment) OS=Sus scrofa PE=2 SV=1
IPECJ2_ENSSSCG00000011953 (pp) IPECJ2_ENSSSCG00000002387	Intra	0.956044	1	9.46978e-08	9305.5	0.956044	zinc finger and BTB domain containing 11 [Source:HGNC Symbol;Acc:HGNC:16740]	G-patch domain containing 2 like [Source:HGNC Symbol;Acc:HGNC:20210]
IPECJ2_ENSSSCG00000017114 (pp) IPECJ2_ENSSSCG00000007472	Intra	0.982418	1	5.27924e-07	27446.5	0.982418	NADH:ubiquinone oxidoreductase subunit S6 [Source:HGNC Symbol;Acc:HGNC:7713]	breast carcinoma amplified sequence 4 [Source:HGNC Symbol;Acc:HGNC:14367]
IPECJ2_ENSSSCG00000017114 (pp) IPECJ2_ENSSSCG00000029161	Intra	0.982418	1	4.10718e-10	27446.5	0.982418	NADH:ubiquinone oxidoreductase subunit S6 [Source:HGNC Symbol;Acc:HGNC:7713]	acireductone dioxygenase 1 [Source:HGNC Symbol;Acc:HGNC:30576]
IPECJ2_ENSSSCG00000017114 (pp) IPECJ2_ENSSSCG00000027840	Intra	0.978022	1	1.55196e-09	26153.5	0.978022	NADH:ubiquinone oxidoreductase subunit S6 [Source:HGNC Symbol;Acc:HGNC:7713]	Unknown
IPECJ2_ENSSSCG00000017114 (pp) IPECJ2_ENSSSCG00000001423	Intra	0.978022	1	1.55196e-09	26153.5	0.978022	NADH:ubiquinone oxidoreductase subunit S6 [Source:HGNC Symbol;Acc:HGNC:7713]	negative elongation factor complex member E [Source:HGNC Symbol;Acc:HGNC:13974]
IPECJ2_ENSSSCG00000017114 (pp) IPECJ2_ENSSSCG00000013267	Intra	0.978022	1	1.07614e-06	26153.5	0.978022	NADH:ubiquinone oxidoreductase subunit S6 [Source:HGNC Symbol;Acc:HGNC:7713]	peroxisomal biogenesis factor 16 [Source:HGNC Symbol;Acc:HGNC:8857]
IPECJ2_ENSSSCG00000017114 (pp) IPECJ2_ENSSSCG00000029362	Intra	0.969231	1	1.14652e-08	21732.5	0.969231	NADH:ubiquinone oxidoreductase subunit S6 [Source:HGNC Symbol;Acc:HGNC:7713]	charged multivesicular body protein 2A [Source:HGNC Symbol;Acc:HGNC:30216]
IPECJ2_ENSSSCG00000017114 (pp) IPECJ2_ENSSSCG00000001884	Intra	0.964835	1	5.02606e-06	18397.5	0.964835	NADH:ubiquinone oxidoreductase subunit S6 [Source:HGNC Symbol;Acc:HGNC:7713]	COMM domain containing 4 [Source:HGNC Symbol;Acc:HGNC:26027]
IPECJ2_ENSSSCG00000017114 (pp) IPECJ2_ENSSSCG00000025928	Intra	0.969231	1	3.28443e-06	21732.5	0.969231	NADH:ubiquinone oxidoreductase subunit S6 [Source:HGNC Symbol;Acc:HGNC:7713]	ribosomal protein L18 [Source:HGNC Symbol;Acc:HGNC:10310]
IPECJ2_ENSSSCG00000017114 (pp) IPECJ2_ENSSSCG00000029034	Intra	0.969231	1	3.28443e-06	21732.5	0.969231	NADH:ubiquinone oxidoreductase subunit S6 [Source:HGNC Symbol;Acc:HGNC:7713]	cytochrome c oxidase subunit 4I1 [Source:HGNC Symbol;Acc:HGNC:2265]
IPECJ2_ENSSSCG00000017114 (pp) IPECJ2_ENSSSCG00000020817	Intra	0.96044	1	7.40017e-06	14245.5	0.96044	NADH:ubiquinone oxidoreductase subunit S6 [Source:HGNC Symbol;Acc:HGNC:7713]	40S ribosomal protein S16 [Source:UniProtKB/Swiss-Prot;Acc:Q29201]
IPECJ2_ENSSSCG00000017114 (pp) IPECJ2_ENSSSCG00000027971	Intra	0.96044	1	5.08105e-08	14245.5	0.96044	NADH:ubiquinone oxidoreductase subunit S6 [Source:HGNC Symbol;Acc:HGNC:7713]	regulatory factor X associated ankyrin containing protein [Source:HGNC Symbol;Acc:HGNC:9987]
IPECJ2_ENSSSCG00000017114 (pp) IPECJ2_ENSSSCG00000012842	Intra	0.96044	1	7.40017e-06	14245.5	0.96044	NADH:ubiquinone oxidoreductase subunit S6 [Source:HGNC Symbol;Acc:HGNC:7713]	Unknown
IPECJ2_ENSSSCG00000017114 (pp) IPECJ2_ENSSSCG00000012965	Intra	0.96044	1	7.40017e-06	14245.5	0.96044	NADH:ubiquinone oxidoreductase subunit S6 [Source:HGNC Symbol;Acc:HGNC:7713]	DR1 associated protein 1 [Source:HGNC Symbol;Acc:HGNC:3019]
IPECJ2_ENSSSCG00000017114 (pp) IPECJ2_ENSSSCG00000022647	Intra	0.956044	1	9.46978e-08	9305.5	0.956044	NADH:ubiquinone oxidoreductase subunit S6 [Source:HGNC Symbol;Acc:HGNC:7713]	translocase of inner mitochondrial membrane 17 homolog B (yeast) [Source:HGNC Symbol;Acc:HGNC:17310]
IPECJ2_ENSSSCG00000017114 (pp) IPECJ2_ENSSSCG00000025868	Intra	0.956044	1	9.46978e-08	9305.5	0.956044	NADH:ubiquinone oxidoreductase subunit S6 [Source:HGNC Symbol;Acc:HGNC:7713]	Unknown
IPECJ2_ENSSSCG00000017114 (pp) IPECJ2_ENSSSCG00000007160	Intra	0.956044	1	1.04633e-05	9305.5	0.956044	NADH:ubiquinone oxidoreductase subunit S6 [Source:HGNC Symbol;Acc:HGNC:7713]	DDRGK domain containing 1 [Source:HGNC Symbol;Acc:HGNC:16110]
IPECJ2_ENSSSCG00000017114 (pp) IPECJ2_ENSSSCG00000012784	Intra	0.956044	1	1.04633e-05	9305.5	0.956044	NADH:ubiquinone oxidoreductase subunit S6 [Source:HGNC Symbol;Acc:HGNC:7713]	signal sequence receptor subunit 4 [Source:HGNC Symbol;Acc:HGNC:11326]
IPECJ2_ENSSSCG00000017114 (pp) IPECJ2_ENSSSCG00000029830	Intra	0.956044	1	1.04633e-05	9305.5	0.956044	NADH:ubiquinone oxidoreductase subunit S6 [Source:HGNC Symbol;Acc:HGNC:7713]	ribosomal protein L8 [Source:HGNC Symbol;Acc:HGNC:10368]
IPECJ2_ENSSSCG00000017114 (pp) IPECJ2_ENSSSCG00000023139	Intra	0.951648	1	1.41528e-05	3309.5	0.951648	NADH:ubiquinone oxidoreductase subunit S6 [Source:HGNC Symbol;Acc:HGNC:7713]	Isoform 2 of Methyltransferase-like protein 23 OS=Homo sapiens GN=METTL23
IPECJ2_ENSSSCG00000004941 (pp) IPECJ2_ENSSSCG00000008762	Intra	0.978022	1	1.55196e-09	26153.5	0.978022	DIS3 like exosome 3'-5' exoribonuclease [Source:HGNC Symbol;Acc:HGNC:28698]	stromal interaction molecule 2 [Source:HGNC Symbol;Acc:HGNC:19205]
IPECJ2_ENSSSCG00000004941 (pp) IPECJ2_ENSSSCG00000002646	Intra	0.969231	-1	3.28443e-06	21732.5	-0.969231	DIS3 like exosome 3'-5' exoribonuclease [Source:HGNC Symbol;Acc:HGNC:28698]	trafficking protein particle complex 2 like [Source:HGNC Symbol;Acc:HGNC:30887]
IPECJ2_ENSSSCG00000004941 (pp) AscL3_gene_L3E_01572	Inter	0.978022	1	1.07614e-06	26153.5	0.978022	DIS3 like exosome 3'-5' exoribonuclease [Source:HGNC Symbol;Acc:HGNC:28698]	Bm1034 OS=Brugia malayi GN=Bm1034 PE=4 SV=1
IPECJ2_ENSSSCG00000004941 (pp) IPECJ2_ENSSSCG00000021542	Intra	0.951648	-1	1.41528e-05	3309.5	-0.951648	DIS3 like exosome 3'-5' exoribonuclease [Source:HGNC Symbol;Acc:HGNC:28698]	Unknown
IPECJ2_ENSSSCG00000012556 (pp) IPECJ2_ENSSSCG00000016835	Intra	0.951648	1	1.66161e-07	3309.5	0.951648	RNA binding motif protein 41 [Source:HGNC Symbol;Acc:HGNC:25617]	S-phase kinase-associated protein 2, E3 ubiquitin protein ligase [Source:HGNC Symbol;Acc:HGNC:10901]
IPECJ2_ENSSSCG00000004941 (pp) IPECJ2_ENSSSCG00000008600	Intra	0.951648	1	1.41528e-05	3309.5	0.951648	DIS3 like exosome 3'-5' exoribonuclease [Source:HGNC Symbol;Acc:HGNC:28698]	pumilio RNA binding family member 2 [Source:HGNC Symbol;Acc:HGNC:14958]
IPECJ2_ENSSSCG00000012556 (pp) IPECJ2_ENSSSCG00000028100	Intra	0.951648	1	1.66161e-07	3309.5	0.951648	RNA binding motif protein 41 [Source:HGNC Symbol;Acc:HGNC:25617]	Unknown
IPECJ2_ENSSSCG00000012624 (pp) IPECJ2_ENSSSCG00000014114	Intra	0.969231	1	3.28443e-06	21732.5	0.969231	solute carrier family 25 member 43 [Source:HGNC Symbol;Acc:HGNC:30557]	poly(A) RNA polymerase D4, non-canonical [Source:HGNC Symbol;Acc:HGNC:26776]
IPECJ2_ENSSSCG00000012624 (pp) IPECJ2_ENSSSCG00000014623	Intra	0.964835	-1	5.02606e-06	18397.5	-0.964835	solute carrier family 25 member 43 [Source:HGNC Symbol;Acc:HGNC:30557]	translocase of inner mitochondrial membrane 10 homolog B (yeast) [Source:HGNC Symbol;Acc:HGNC:4022]
IPECJ2_ENSSSCG00000008762 (pp) IPECJ2_ENSSSCG00000008600	Intra	0.973626	1	1.97568e-06	24252.5	0.973626	stromal interaction molecule 2 [Source:HGNC Symbol;Acc:HGNC:19205]	pumilio RNA binding family member 2 [Source:HGNC Symbol;Acc:HGNC:14958]
IPECJ2_ENSSSCG00000008762 (pp) IPECJ2_ENSSSCG00000015201	Intra	0.973626	1	1.97568e-06	24252.5	0.973626	stromal interaction molecule 2 [Source:HGNC Symbol;Acc:HGNC:19205]	Uncharacterized protein OS=Sus scrofa GN=MSANTD2 PE=4 SV=1
IPECJ2_ENSSSCG00000008762 (pp) AscL3_gene_L3E_01572	Inter	0.96044	1	7.40017e-06	14245.5	0.96044	stromal interaction molecule 2 [Source:HGNC Symbol;Acc:HGNC:19205]	Bm1034 OS=Brugia malayi GN=Bm1034 PE=4 SV=1
IPECJ2_ENSSSCG00000008762 (pp) IPECJ2_ENSSSCG00000003727	Intra	0.951648	1	1.41528e-05	3309.5	0.951648	stromal interaction molecule 2 [Source:HGNC Symbol;Acc:HGNC:19205]	Isoform 2 of Trafficking protein particle complex subunit 8 OS=Homo sapiens GN=TRAPPC8
IPECJ2_ENSSSCG00000004970 (pp) IPECJ2_ENSSSCG00000010063	Intra	0.991209	1	6.5401e-12	28659.5	0.991209	Unknown	Macrophage migration inhibitory factor OS=Sus scrofa GN=MIF PE=1 SV=3
IPECJ2_ENSSSCG00000004970 (pp) IPECJ2_ENSSSCG00000024974	Intra	0.982418	1	5.27924e-07	27446.5	0.982418	Unknown	ribosomal protein L13 [Source:HGNC Symbol;Acc:HGNC:10303]
IPECJ2_ENSSSCG00000004970 (pp) IPECJ2_ENSSSCG00000019018	Intra	0.978022	1	1.07614e-06	26153.5	0.978022	Unknown	Unknown
IPECJ2_ENSSSCG00000008762 (pp) IPECJ2_ENSSSCG00000024984	Intra	0.951648	-1	1.41528e-05	3309.5	-0.951648	stromal interaction molecule 2 [Source:HGNC Symbol;Acc:HGNC:19205]	Unknown
IPECJ2_ENSSSCG00000004970 (pp) IPECJ2_ENSSSCG00000020790	Intra	0.982418	1	5.27924e-07	27446.5	0.982418	Unknown	Uncharacterized protein OS=Sus scrofa GN=MYEOV2 PE=1 SV=1
IPECJ2_ENSSSCG00000004970 (pp) IPECJ2_ENSSSCG00000027971	Intra	0.973626	1	4.59028e-09	24252.5	0.973626	Unknown	regulatory factor X associated ankyrin containing protein [Source:HGNC Symbol;Acc:HGNC:9987]
IPECJ2_ENSSSCG00000004970 (pp) IPECJ2_ENSSSCG00000027353	Intra	0.978022	1	1.55196e-09	26153.5	0.978022	Unknown	Unknown
IPECJ2_ENSSSCG00000004970 (pp) IPECJ2_ENSSSCG00000021825	Intra	0.973626	1	1.97568e-06	24252.5	0.973626	Unknown	40S ribosomal protein S21 [Source:UniProtKB/Swiss-Prot;Acc:P63221]
IPECJ2_ENSSSCG00000004970 (pp) IPECJ2_ENSSSCG00000026812	Intra	0.969231	1	1.14652e-08	21732.5	0.969231	Unknown	Unknown
IPECJ2_ENSSSCG00000004970 (pp) IPECJ2_ENSSSCG00000010631	Intra	0.969231	-1	1.14652e-08	21732.5	-0.969231	Unknown	glycerol-3-phosphate acyltransferase, mitochondrial [Source:HGNC Symbol;Acc:HGNC:24865]
IPECJ2_ENSSSCG00000004970 (pp) IPECJ2_ENSSSCG00000012842	Intra	0.969231	1	3.28443e-06	21732.5	0.969231	Unknown	Unknown
IPECJ2_ENSSSCG00000004970 (pp) IPECJ2_ENSSSCG00000007160	Intra	0.964835	1	2.53041e-08	18397.5	0.964835	Unknown	DDRGK domain containing 1 [Source:HGNC Symbol;Acc:HGNC:16110]
IPECJ2_ENSSSCG00000004970 (pp) IPECJ2_ENSSSCG00000010865	Intra	0.964835	-1	2.53041e-08	18397.5	-0.964835	Unknown	exonuclease 1 [Source:HGNC Symbol;Acc:HGNC:3511]
IPECJ2_ENSSSCG00000004970 (pp) IPECJ2_XLOC_011183	Intra	0.969231	1	3.28443e-06	21732.5	0.969231	Unknown	Inosine triphosphate pyrophosphatase OS=Bos taurus GN=ITPA PE=2 SV=1
IPECJ2_XLOC_005381 (pp) IPECJ2_ENSSSCG00000029034	Intra	0.978022	1	1.07614e-06	26153.5	0.978022	Unknown	cytochrome c oxidase subunit 4I1 [Source:HGNC Symbol;Acc:HGNC:2265]
IPECJ2_ENSSSCG00000012727 (pp) IPECJ2_ENSSSCG00000027840	Intra	0.973626	-1	4.59028e-09	24252.5	-0.973626	fragile X mental retardation 1 [Source:HGNC Symbol;Acc:HGNC:3775]	Unknown
IPECJ2_ENSSSCG00000004970 (pp) IPECJ2_ENSSSCG00000029362	Intra	0.964835	1	2.53041e-08	18397.5	0.964835	Unknown	charged multivesicular body protein 2A [Source:HGNC Symbol;Acc:HGNC:30216]
IPECJ2_XLOC_005381 (pp) IPECJ2_ENSSSCG00000029830	Intra	0.982418	1	5.27924e-07	27446.5	0.982418	Unknown	ribosomal protein L8 [Source:HGNC Symbol;Acc:HGNC:10368]
IPECJ2_XLOC_005381 (pp) IPECJ2_ENSSSCG00000025928	Intra	0.978022	1	1.07614e-06	26153.5	0.978022	Unknown	ribosomal protein L18 [Source:HGNC Symbol;Acc:HGNC:10310]
IPECJ2_ENSSSCG00000012727 (pp) IPECJ2_ENSSSCG00000029034	Intra	0.969231	-1	1.14652e-08	21732.5	-0.969231	fragile X mental retardation 1 [Source:HGNC Symbol;Acc:HGNC:3775]	cytochrome c oxidase subunit 4I1 [Source:HGNC Symbol;Acc:HGNC:2265]
IPECJ2_ENSSSCG00000004970 (pp) IPECJ2_ENSSSCG00000012784	Intra	0.96044	1	7.40017e-06	14245.5	0.96044	Unknown	signal sequence receptor subunit 4 [Source:HGNC Symbol;Acc:HGNC:11326]
IPECJ2_ENSSSCG00000012727 (pp) IPECJ2_ENSSSCG00000029161	Intra	0.969231	-1	1.14652e-08	21732.5	-0.969231	fragile X mental retardation 1 [Source:HGNC Symbol;Acc:HGNC:3775]	acireductone dioxygenase 1 [Source:HGNC Symbol;Acc:HGNC:30576]
IPECJ2_XLOC_005381 (pp) IPECJ2_ENSSSCG00000013267	Intra	0.964835	1	5.02606e-06	18397.5	0.964835	Unknown	peroxisomal biogenesis factor 16 [Source:HGNC Symbol;Acc:HGNC:8857]
IPECJ2_ENSSSCG00000004970 (pp) IPECJ2_ENSSSCG00000017705	Intra	0.96044	1	7.40017e-06	14245.5	0.96044	Unknown	C-C motif chemokine ligand 5 [Source:HGNC Symbol;Acc:HGNC:10632]
IPECJ2_ENSSSCG00000004970 (pp) IPECJ2_XLOC_029898	Intra	0.964835	1	5.02606e-06	18397.5	0.964835	Unknown	Proteasome subunit beta type-7 OS=Sus scrofa GN=PSMB7 PE=2 SV=2
IPECJ2_ENSSSCG00000012727 (pp) IPECJ2_ENSSSCG00000012965	Intra	0.969231	-1	1.14652e-08	21732.5	-0.969231	fragile X mental retardation 1 [Source:HGNC Symbol;Acc:HGNC:3775]	DR1 associated protein 1 [Source:HGNC Symbol;Acc:HGNC:3019]
IPECJ2_ENSSSCG00000012727 (pp) IPECJ2_ENSSSCG00000025928	Intra	0.969231	-1	3.28443e-06	21732.5	-0.969231	fragile X mental retardation 1 [Source:HGNC Symbol;Acc:HGNC:3775]	ribosomal protein L18 [Source:HGNC Symbol;Acc:HGNC:10310]
IPECJ2_XLOC_005381 (pp) IPECJ2_ENSSSCG00000009479	Intra	0.96044	-1	7.40017e-06	14245.5	-0.96044	Unknown	RNA binding motif protein 26 [Source:HGNC Symbol;Acc:HGNC:20327]
IPECJ2_ENSSSCG00000012727 (pp) IPECJ2_ENSSSCG00000015786	Intra	0.964835	1	5.02606e-06	18397.5	0.964835	fragile X mental retardation 1 [Source:HGNC Symbol;Acc:HGNC:3775]	Unknown
IPECJ2_ENSSSCG00000012727 (pp) IPECJ2_ENSSSCG00000022647	Intra	0.964835	-1	2.53041e-08	18397.5	-0.964835	fragile X mental retardation 1 [Source:HGNC Symbol;Acc:HGNC:3775]	translocase of inner mitochondrial membrane 17 homolog B (yeast) [Source:HGNC Symbol;Acc:HGNC:17310]
IPECJ2_XLOC_005381 (pp) IPECJ2_ENSSSCG00000027827	Intra	0.96044	1	5.08105e-08	14245.5	0.96044	Unknown	UDP-galactose-4-epimerase [Source:HGNC Symbol;Acc:HGNC:4116]
IPECJ2_ENSSSCG00000004970 (pp) IPECJ2_ENSSSCG00000012965	Intra	0.956044	1	9.46978e-08	9305.5	0.956044	Unknown	DR1 associated protein 1 [Source:HGNC Symbol;Acc:HGNC:3019]
IPECJ2_XLOC_005381 (pp) IPECJ2_ENSSSCG00000023110	Intra	0.964835	1	2.53041e-08	18397.5	0.964835	Unknown	UBX domain protein 1 [Source:HGNC Symbol;Acc:HGNC:18402]
IPECJ2_ENSSSCG00000012727 (pp) IPECJ2_ENSSSCG00000013267	Intra	0.964835	-1	5.02606e-06	18397.5	-0.964835	fragile X mental retardation 1 [Source:HGNC Symbol;Acc:HGNC:3775]	peroxisomal biogenesis factor 16 [Source:HGNC Symbol;Acc:HGNC:8857]
IPECJ2_ENSSSCG00000004970 (pp) IPECJ2_ENSSSCG00000007646	Intra	0.956044	1	1.04633e-05	9305.5	0.956044	Unknown	late endosomal/lysosomal adaptor, MAPK and MTOR activator 4 [Source:HGNC Symbol;Acc:HGNC:33772]
IPECJ2_ENSSSCG00000012727 (pp) IPECJ2_ENSSSCG00000013619	Intra	0.964835	-1	2.53041e-08	18397.5	-0.964835	fragile X mental retardation 1 [Source:HGNC Symbol;Acc:HGNC:3775]	SWIM-type zinc finger 7 associated protein 1 [Source:HGNC Symbol;Acc:HGNC:26638]
IPECJ2_XLOC_005381 (pp) IPECJ2_ENSSSCG00000003080	Intra	0.96044	1	7.40017e-06	14245.5	0.96044	Unknown	immunoglobulin superfamily member 23 [Source:HGNC Symbol;Acc:HGNC:40040]
IPECJ2_ENSSSCG00000012727 (pp) IPECJ2_ENSSSCG00000006777	Intra	0.96044	-1	5.08105e-08	14245.5	-0.96044	fragile X mental retardation 1 [Source:HGNC Symbol;Acc:HGNC:3775]	ras homolog family member C [Source:HGNC Symbol;Acc:HGNC:669]
IPECJ2_ENSSSCG00000017308 (pp) IPECJ2_ENSSSCG00000014076	Intra	0.991209	1	4.46942e-08	28659.5	0.991209	cell division cycle 27 [Source:HGNC Symbol;Acc:HGNC:1728]	Isoform 2 of Soluble lamin-associated protein of 75 kDa OS=Homo sapiens GN=FAM169A
IPECJ2_XLOC_005381 (pp) IPECJ2_ENSSSCG00000006777	Intra	0.951648	1	1.41528e-05	3309.5	0.951648	Unknown	ras homolog family member C [Source:HGNC Symbol;Acc:HGNC:669]
IPECJ2_XLOC_005381 (pp) IPECJ2_ENSSSCG00000029362	Intra	0.96044	1	5.08105e-08	14245.5	0.96044	Unknown	charged multivesicular body protein 2A [Source:HGNC Symbol;Acc:HGNC:30216]
IPECJ2_ENSSSCG00000012727 (pp) IPECJ2_ENSSSCG00000026812	Intra	0.964835	-1	2.53041e-08	18397.5	-0.964835	fragile X mental retardation 1 [Source:HGNC Symbol;Acc:HGNC:3775]	Unknown
IPECJ2_ENSSSCG00000004970 (pp) IPECJ2_ENSSSCG00000020817	Intra	0.956044	1	1.04633e-05	9305.5	0.956044	Unknown	40S ribosomal protein S16 [Source:UniProtKB/Swiss-Prot;Acc:Q29201]
IPECJ2_ENSSSCG00000012727 (pp) IPECJ2_ENSSSCG00000029830	Intra	0.96044	-1	5.08105e-08	14245.5	-0.96044	fragile X mental retardation 1 [Source:HGNC Symbol;Acc:HGNC:3775]	ribosomal protein L8 [Source:HGNC Symbol;Acc:HGNC:10368]
IPECJ2_ENSSSCG00000012727 (pp) IPECJ2_XLOC_007562	Intra	0.96044	-1	5.08105e-08	14245.5	-0.96044	fragile X mental retardation 1 [Source:HGNC Symbol;Acc:HGNC:3775]	Unknown
IPECJ2_XLOC_005381 (pp) IPECJ2_ENSSSCG00000020817	Intra	0.951648	1	1.41528e-05	3309.5	0.951648	Unknown	40S ribosomal protein S16 [Source:UniProtKB/Swiss-Prot;Acc:Q29201]
IPECJ2_ENSSSCG00000012727 (pp) IPECJ2_ENSSSCG00000007472	Intra	0.96044	-1	7.40017e-06	14245.5	-0.96044	fragile X mental retardation 1 [Source:HGNC Symbol;Acc:HGNC:3775]	breast carcinoma amplified sequence 4 [Source:HGNC Symbol;Acc:HGNC:14367]
IPECJ2_XLOC_005381 (pp) IPECJ2_ENSSSCG00000007472	Intra	0.951648	1	1.41528e-05	3309.5	0.951648	Unknown	breast carcinoma amplified sequence 4 [Source:HGNC Symbol;Acc:HGNC:14367]
IPECJ2_ENSSSCG00000012727 (pp) IPECJ2_ENSSSCG00000016395	Intra	0.96044	1	5.08105e-08	14245.5	0.96044	fragile X mental retardation 1 [Source:HGNC Symbol;Acc:HGNC:3775]	replication timing regulatory factor 1 [Source:HGNC Symbol;Acc:HGNC:23207]
IPECJ2_ENSSSCG00000017308 (pp) IPECJ2_ENSSSCG00000021825	Intra	0.973626	-1	1.97568e-06	24252.5	-0.973626	cell division cycle 27 [Source:HGNC Symbol;Acc:HGNC:1728]	40S ribosomal protein S21 [Source:UniProtKB/Swiss-Prot;Acc:P63221]
IPECJ2_ENSSSCG00000012727 (pp) IPECJ2_ENSSSCG00000026914	Intra	0.956044	-1	9.46978e-08	9305.5	-0.956044	fragile X mental retardation 1 [Source:HGNC Symbol;Acc:HGNC:3775]	phospholipase A2 group XVI [Source:HGNC Symbol;Acc:HGNC:17825]
IPECJ2_ENSSSCG00000012727 (pp) IPECJ2_ENSSSCG00000012784	Intra	0.956044	-1	1.04633e-05	9305.5	-0.956044	fragile X mental retardation 1 [Source:HGNC Symbol;Acc:HGNC:3775]	signal sequence receptor subunit 4 [Source:HGNC Symbol;Acc:HGNC:11326]
IPECJ2_XLOC_005381 (pp) IPECJ2_XLOC_023587	Intra	0.951648	1	1.66161e-07	3309.5	0.951648	Unknown	IL-23 (Fragment) OS=Sus scrofa PE=2 SV=1
IPECJ2_XLOC_005381 (pp) IPECJ2_XLOC_029898	Intra	0.951648	1	1.41528e-05	3309.5	0.951648	Unknown	Proteasome subunit beta type-7 OS=Sus scrofa GN=PSMB7 PE=2 SV=2
IPECJ2_ENSSSCG00000012727 (pp) IPECJ2_ENSSSCG00000012960	Intra	0.956044	-1	9.46978e-08	9305.5	-0.956044	fragile X mental retardation 1 [Source:HGNC Symbol;Acc:HGNC:3775]	cystatin E/M [Source:HGNC Symbol;Acc:HGNC:2478]
IPECJ2_ENSSSCG00000012727 (pp) IPECJ2_ENSSSCG00000029362	Intra	0.951648	-1	1.66161e-07	3309.5	-0.951648	fragile X mental retardation 1 [Source:HGNC Symbol;Acc:HGNC:3775]	charged multivesicular body protein 2A [Source:HGNC Symbol;Acc:HGNC:30216]
IPECJ2_ENSSSCG00000017308 (pp) IPECJ2_ENSSSCG00000019018	Intra	0.969231	-1	3.28443e-06	21732.5	-0.969231	cell division cycle 27 [Source:HGNC Symbol;Acc:HGNC:1728]	Unknown
IPECJ2_ENSSSCG00000012784 (pp) IPECJ2_ENSSSCG00000012965	Intra	0.995604	1	1.03029e-13	28836.5	0.995604	signal sequence receptor subunit 4 [Source:HGNC Symbol;Acc:HGNC:11326]	DR1 associated protein 1 [Source:HGNC Symbol;Acc:HGNC:3019]
IPECJ2_ENSSSCG00000017308 (pp) IPECJ2_XLOC_029898	Intra	0.973626	-1	1.97568e-06	24252.5	-0.973626	cell division cycle 27 [Source:HGNC Symbol;Acc:HGNC:1728]	Proteasome subunit beta type-7 OS=Sus scrofa GN=PSMB7 PE=2 SV=2
IPECJ2_ENSSSCG00000012727 (pp) IPECJ2_ENSSSCG00000020817	Intra	0.951648	-1	1.41528e-05	3309.5	-0.951648	fragile X mental retardation 1 [Source:HGNC Symbol;Acc:HGNC:3775]	40S ribosomal protein S16 [Source:UniProtKB/Swiss-Prot;Acc:Q29201]
IPECJ2_ENSSSCG00000012727 (pp) IPECJ2_ENSSSCG00000027971	Intra	0.951648	-1	1.66161e-07	3309.5	-0.951648	fragile X mental retardation 1 [Source:HGNC Symbol;Acc:HGNC:3775]	regulatory factor X associated ankyrin containing protein [Source:HGNC Symbol;Acc:HGNC:9987]
IPECJ2_ENSSSCG00000012784 (pp) IPECJ2_ENSSSCG00000020790	Intra	0.986813	1	1.88722e-07	28223.5	0.986813	signal sequence receptor subunit 4 [Source:HGNC Symbol;Acc:HGNC:11326]	Uncharacterized protein OS=Sus scrofa GN=MYEOV2 PE=1 SV=1
IPECJ2_ENSSSCG00000012784 (pp) IPECJ2_ENSSSCG00000026812	Intra	0.986813	1	7.37952e-11	28223.5	0.986813	signal sequence receptor subunit 4 [Source:HGNC Symbol;Acc:HGNC:11326]	Unknown
IPECJ2_ENSSSCG00000017308 (pp) IPECJ2_ENSSSCG00000027353	Intra	0.964835	-1	5.02606e-06	18397.5	-0.964835	cell division cycle 27 [Source:HGNC Symbol;Acc:HGNC:1728]	Unknown
IPECJ2_ENSSSCG00000012784 (pp) IPECJ2_ENSSSCG00000020817	Intra	0.995604	1	2.81634e-09	28836.5	0.995604	signal sequence receptor subunit 4 [Source:HGNC Symbol;Acc:HGNC:11326]	40S ribosomal protein S16 [Source:UniProtKB/Swiss-Prot;Acc:Q29201]
IPECJ2_ENSSSCG00000012784 (pp) IPECJ2_ENSSSCG00000027971	Intra	0.995604	1	1.03029e-13	28836.5	0.995604	signal sequence receptor subunit 4 [Source:HGNC Symbol;Acc:HGNC:11326]	regulatory factor X associated ankyrin containing protein [Source:HGNC Symbol;Acc:HGNC:9987]
IPECJ2_ENSSSCG00000012784 (pp) IPECJ2_ENSSSCG00000025928	Intra	0.978022	1	1.55196e-09	26153.5	0.978022	signal sequence receptor subunit 4 [Source:HGNC Symbol;Acc:HGNC:11326]	ribosomal protein L18 [Source:HGNC Symbol;Acc:HGNC:10310]
IPECJ2_ENSSSCG00000012784 (pp) IPECJ2_ENSSSCG00000021825	Intra	0.978022	1	1.07614e-06	26153.5	0.978022	signal sequence receptor subunit 4 [Source:HGNC Symbol;Acc:HGNC:11326]	40S ribosomal protein S21 [Source:UniProtKB/Swiss-Prot;Acc:P63221]
IPECJ2_ENSSSCG00000012784 (pp) IPECJ2_ENSSSCG00000024974	Intra	0.978022	1	1.55196e-09	26153.5	0.978022	signal sequence receptor subunit 4 [Source:HGNC Symbol;Acc:HGNC:11326]	ribosomal protein L13 [Source:HGNC Symbol;Acc:HGNC:10303]
IPECJ2_ENSSSCG00000012784 (pp) IPECJ2_ENSSSCG00000029362	Intra	0.978022	1	1.55196e-09	26153.5	0.978022	signal sequence receptor subunit 4 [Source:HGNC Symbol;Acc:HGNC:11326]	charged multivesicular body protein 2A [Source:HGNC Symbol;Acc:HGNC:30216]
IPECJ2_ENSSSCG00000017308 (pp) IPECJ2_XLOC_011183	Intra	0.956044	-1	1.04633e-05	9305.5	-0.956044	cell division cycle 27 [Source:HGNC Symbol;Acc:HGNC:1728]	Inosine triphosphate pyrophosphatase OS=Bos taurus GN=ITPA PE=2 SV=1
IPECJ2_ENSSSCG00000012784 (pp) IPECJ2_XLOC_029898	Intra	0.978022	1	1.55196e-09	26153.5	0.978022	signal sequence receptor subunit 4 [Source:HGNC Symbol;Acc:HGNC:11326]	Proteasome subunit beta type-7 OS=Sus scrofa GN=PSMB7 PE=2 SV=2
IPECJ2_ENSSSCG00000017308 (pp) IPECJ2_ENSSSCG00000020790	Intra	0.951648	-1	1.41528e-05	3309.5	-0.951648	cell division cycle 27 [Source:HGNC Symbol;Acc:HGNC:1728]	Uncharacterized protein OS=Sus scrofa GN=MYEOV2 PE=1 SV=1
IPECJ2_ENSSSCG00000012784 (pp) IPECJ2_ENSSSCG00000029034	Intra	0.978022	1	1.55196e-09	26153.5	0.978022	signal sequence receptor subunit 4 [Source:HGNC Symbol;Acc:HGNC:11326]	cytochrome c oxidase subunit 4I1 [Source:HGNC Symbol;Acc:HGNC:2265]
IPECJ2_ENSSSCG00000012784 (pp) IPECJ2_ENSSSCG00000029161	Intra	0.978022	1	1.55196e-09	26153.5	0.978022	signal sequence receptor subunit 4 [Source:HGNC Symbol;Acc:HGNC:11326]	acireductone dioxygenase 1 [Source:HGNC Symbol;Acc:HGNC:30576]
IPECJ2_ENSSSCG00000012784 (pp) IPECJ2_ENSSSCG00000017705	Intra	0.973626	1	1.97568e-06	24252.5	0.973626	signal sequence receptor subunit 4 [Source:HGNC Symbol;Acc:HGNC:11326]	C-C motif chemokine ligand 5 [Source:HGNC Symbol;Acc:HGNC:10632]
IPECJ2_ENSSSCG00000012784 (pp) IPECJ2_ENSSSCG00000019018	Intra	0.973626	1	1.97568e-06	24252.5	0.973626	signal sequence receptor subunit 4 [Source:HGNC Symbol;Acc:HGNC:11326]	Unknown
IPECJ2_ENSSSCG00000012784 (pp) IPECJ2_ENSSSCG00000012842	Intra	0.973626	1	1.97568e-06	24252.5	0.973626	signal sequence receptor subunit 4 [Source:HGNC Symbol;Acc:HGNC:11326]	Unknown
IPECJ2_ENSSSCG00000012784 (pp) IPECJ2_ENSSSCG00000013267	Intra	0.973626	1	1.97568e-06	24252.5	0.973626	signal sequence receptor subunit 4 [Source:HGNC Symbol;Acc:HGNC:11326]	peroxisomal biogenesis factor 16 [Source:HGNC Symbol;Acc:HGNC:8857]
IPECJ2_ENSSSCG00000012784 (pp) IPECJ2_ENSSSCG00000027353	Intra	0.969231	1	1.14652e-08	21732.5	0.969231	signal sequence receptor subunit 4 [Source:HGNC Symbol;Acc:HGNC:11326]	Unknown
IPECJ2_ENSSSCG00000012784 (pp) IPECJ2_ENSSSCG00000027840	Intra	0.969231	1	1.14652e-08	21732.5	0.969231	signal sequence receptor subunit 4 [Source:HGNC Symbol;Acc:HGNC:11326]	Unknown
IPECJ2_ENSSSCG00000012784 (pp) IPECJ2_XLOC_011183	Intra	0.964835	1	2.53041e-08	18397.5	0.964835	signal sequence receptor subunit 4 [Source:HGNC Symbol;Acc:HGNC:11326]	Inosine triphosphate pyrophosphatase OS=Bos taurus GN=ITPA PE=2 SV=1
IPECJ2_ENSSSCG00000012842 (pp) IPECJ2_ENSSSCG00000029362	Intra	0.991209	1	6.5401e-12	28659.5	0.991209	Unknown	charged multivesicular body protein 2A [Source:HGNC Symbol;Acc:HGNC:30216]
IPECJ2_ENSSSCG00000012842 (pp) IPECJ2_ENSSSCG00000020790	Intra	0.986813	1	1.88722e-07	28223.5	0.986813	Unknown	Uncharacterized protein OS=Sus scrofa GN=MYEOV2 PE=1 SV=1
IPECJ2_ENSSSCG00000012842 (pp) IPECJ2_ENSSSCG00000024974	Intra	0.978022	1	1.55196e-09	26153.5	0.978022	Unknown	ribosomal protein L13 [Source:HGNC Symbol;Acc:HGNC:10303]
IPECJ2_ENSSSCG00000012842 (pp) IPECJ2_ENSSSCG00000025928	Intra	0.978022	1	1.55196e-09	26153.5	0.978022	Unknown	ribosomal protein L18 [Source:HGNC Symbol;Acc:HGNC:10310]
IPECJ2_ENSSSCG00000012842 (pp) IPECJ2_ENSSSCG00000020817	Intra	0.982418	1	5.27924e-07	27446.5	0.982418	Unknown	40S ribosomal protein S16 [Source:UniProtKB/Swiss-Prot;Acc:Q29201]
IPECJ2_ENSSSCG00000012842 (pp) IPECJ2_ENSSSCG00000027971	Intra	0.982418	1	4.10718e-10	27446.5	0.982418	Unknown	regulatory factor X associated ankyrin containing protein [Source:HGNC Symbol;Acc:HGNC:9987]
IPECJ2_ENSSSCG00000012842 (pp) IPECJ2_ENSSSCG00000019018	Intra	0.973626	1	1.97568e-06	24252.5	0.973626	Unknown	Unknown
IPECJ2_ENSSSCG00000012842 (pp) IPECJ2_ENSSSCG00000029034	Intra	0.978022	1	1.55196e-09	26153.5	0.978022	Unknown	cytochrome c oxidase subunit 4I1 [Source:HGNC Symbol;Acc:HGNC:2265]
IPECJ2_ENSSSCG00000012842 (pp) IPECJ2_ENSSSCG00000017705	Intra	0.973626	1	1.97568e-06	24252.5	0.973626	Unknown	C-C motif chemokine ligand 5 [Source:HGNC Symbol;Acc:HGNC:10632]
IPECJ2_ENSSSCG00000012842 (pp) IPECJ2_ENSSSCG00000012965	Intra	0.969231	1	1.14652e-08	21732.5	0.969231	Unknown	DR1 associated protein 1 [Source:HGNC Symbol;Acc:HGNC:3019]
IPECJ2_ENSSSCG00000012842 (pp) IPECJ2_ENSSSCG00000013267	Intra	0.969231	1	1.14652e-08	21732.5	0.969231	Unknown	peroxisomal biogenesis factor 16 [Source:HGNC Symbol;Acc:HGNC:8857]
IPECJ2_ENSSSCG00000012842 (pp) IPECJ2_ENSSSCG00000029161	Intra	0.973626	1	4.59028e-09	24252.5	0.973626	Unknown	acireductone dioxygenase 1 [Source:HGNC Symbol;Acc:HGNC:30576]
IPECJ2_ENSSSCG00000012842 (pp) IPECJ2_ENSSSCG00000029830	Intra	0.973626	1	4.59028e-09	24252.5	0.973626	Unknown	ribosomal protein L8 [Source:HGNC Symbol;Acc:HGNC:10368]
IPECJ2_ENSSSCG00000012842 (pp) IPECJ2_ENSSSCG00000010631	Intra	0.964835	-1	2.53041e-08	18397.5	-0.964835	Unknown	glycerol-3-phosphate acyltransferase, mitochondrial [Source:HGNC Symbol;Acc:HGNC:24865]
IPECJ2_ENSSSCG00000012842 (pp) IPECJ2_ENSSSCG00000021825	Intra	0.969231	1	3.28443e-06	21732.5	0.969231	Unknown	40S ribosomal protein S21 [Source:UniProtKB/Swiss-Prot;Acc:P63221]
IPECJ2_ENSSSCG00000012842 (pp) IPECJ2_ENSSSCG00000027353	Intra	0.969231	1	1.14652e-08	21732.5	0.969231	Unknown	Unknown
IPECJ2_ENSSSCG00000012842 (pp) IPECJ2_ENSSSCG00000026812	Intra	0.96044	1	5.08105e-08	14245.5	0.96044	Unknown	Unknown
IPECJ2_ENSSSCG00000012842 (pp) IPECJ2_ENSSSCG00000027840	Intra	0.96044	1	5.08105e-08	14245.5	0.96044	Unknown	Unknown
IPECJ2_ENSSSCG00000012842 (pp) IPECJ2_XLOC_029898	Intra	0.964835	1	2.53041e-08	18397.5	0.964835	Unknown	Proteasome subunit beta type-7 OS=Sus scrofa GN=PSMB7 PE=2 SV=2
IPECJ2_ENSSSCG00000012842 (pp) IPECJ2_ENSSSCG00000010063	Intra	0.96044	1	5.08105e-08	14245.5	0.96044	Unknown	Macrophage migration inhibitory factor OS=Sus scrofa GN=MIF PE=1 SV=3
IPECJ2_ENSSSCG00000012842 (pp) IPECJ2_ENSSSCG00000023139	Intra	0.951648	1	1.41528e-05	3309.5	0.951648	Unknown	Isoform 2 of Methyltransferase-like protein 23 OS=Homo sapiens GN=METTL23
IPECJ2_ENSSSCG00000017673 (pp) IPECJ2_ENSSSCG00000015972	Intra	0.969231	1	1.14652e-08	21732.5	0.969231	integrator complex subunit 2 [Source:HGNC Symbol;Acc:HGNC:29241]	Unknown
IPECJ2_ENSSSCG00000017673 (pp) IPECJ2_ENSSSCG00000003727	Intra	0.973626	1	4.59028e-09	24252.5	0.973626	integrator complex subunit 2 [Source:HGNC Symbol;Acc:HGNC:29241]	Isoform 2 of Trafficking protein particle complex subunit 8 OS=Homo sapiens GN=TRAPPC8
IPECJ2_ENSSSCG00000012905 (pp) IPECJ2_ENSSSCG00000023325	Intra	0.982418	1	4.10718e-10	27446.5	0.982418	transmembrane protein 134 [Source:HGNC Symbol;Acc:HGNC:26142]	Aminoacylase-1 [Source:UniProtKB/Swiss-Prot;Acc:P37111]
IPECJ2_ENSSSCG00000025868 (pp) IPECJ2_ENSSSCG00000001884	Intra	0.995604	1	2.81634e-09	28836.5	0.995604	Unknown	COMM domain containing 4 [Source:HGNC Symbol;Acc:HGNC:26027]
IPECJ2_ENSSSCG00000025868 (pp) IPECJ2_ENSSSCG00000001423	Intra	0.973626	1	4.59028e-09	24252.5	0.973626	Unknown	negative elongation factor complex member E [Source:HGNC Symbol;Acc:HGNC:13974]
IPECJ2_ENSSSCG00000012905 (pp) IPECJ2_ENSSSCG00000029855	Intra	0.973626	1	4.59028e-09	24252.5	0.973626	transmembrane protein 134 [Source:HGNC Symbol;Acc:HGNC:26142]	lipoma HMGIC fusion partner [Source:HGNC Symbol;Acc:HGNC:6586]
IPECJ2_ENSSSCG00000025820 (pp) IPECJ2_ENSSSCG00000003727	Intra	0.96044	1	7.40017e-06	14245.5	0.96044	solute carrier family 15 member 4 [Source:HGNC Symbol;Acc:HGNC:23090]	Isoform 2 of Trafficking protein particle complex subunit 8 OS=Homo sapiens GN=TRAPPC8
IPECJ2_ENSSSCG00000012905 (pp) IPECJ2_ENSSSCG00000022867	Intra	0.969231	1	1.14652e-08	21732.5	0.969231	transmembrane protein 134 [Source:HGNC Symbol;Acc:HGNC:26142]	Unknown
IPECJ2_ENSSSCG00000025868 (pp) IPECJ2_ENSSSCG00000029161	Intra	0.973626	1	4.59028e-09	24252.5	0.973626	Unknown	acireductone dioxygenase 1 [Source:HGNC Symbol;Acc:HGNC:30576]
IPECJ2_ENSSSCG00000025868 (pp) IPECJ2_ENSSSCG00000012965	Intra	0.969231	1	3.28443e-06	21732.5	0.969231	Unknown	DR1 associated protein 1 [Source:HGNC Symbol;Acc:HGNC:3019]
IPECJ2_ENSSSCG00000012905 (pp) IPECJ2_ENSSSCG00000007472	Intra	0.964835	1	2.53041e-08	18397.5	0.964835	transmembrane protein 134 [Source:HGNC Symbol;Acc:HGNC:26142]	breast carcinoma amplified sequence 4 [Source:HGNC Symbol;Acc:HGNC:14367]
IPECJ2_ENSSSCG00000025868 (pp) IPECJ2_ENSSSCG00000013267	Intra	0.973626	1	1.97568e-06	24252.5	0.973626	Unknown	peroxisomal biogenesis factor 16 [Source:HGNC Symbol;Acc:HGNC:8857]
IPECJ2_ENSSSCG00000012905 (pp) IPECJ2_ENSSSCG00000006777	Intra	0.969231	1	1.14652e-08	21732.5	0.969231	transmembrane protein 134 [Source:HGNC Symbol;Acc:HGNC:26142]	ras homolog family member C [Source:HGNC Symbol;Acc:HGNC:669]
IPECJ2_ENSSSCG00000012905 (pp) IPECJ2_ENSSSCG00000022647	Intra	0.969231	1	1.14652e-08	21732.5	0.969231	transmembrane protein 134 [Source:HGNC Symbol;Acc:HGNC:26142]	translocase of inner mitochondrial membrane 17 homolog B (yeast) [Source:HGNC Symbol;Acc:HGNC:17310]
IPECJ2_ENSSSCG00000025868 (pp) IPECJ2_ENSSSCG00000027840	Intra	0.973626	1	4.59028e-09	24252.5	0.973626	Unknown	Unknown
IPECJ2_ENSSSCG00000012905 (pp) AscL3_gene_GS_09942	Inter	0.96044	-1	7.40017e-06	14245.5	-0.96044	transmembrane protein 134 [Source:HGNC Symbol;Acc:HGNC:26142]	Sperm-specific protein OS=Ascaris suum GN=ASU_04668 PE=4 SV=1
IPECJ2_ENSSSCG00000025868 (pp) IPECJ2_ENSSSCG00000029034	Intra	0.964835	1	5.02606e-06	18397.5	0.964835	Unknown	cytochrome c oxidase subunit 4I1 [Source:HGNC Symbol;Acc:HGNC:2265]
IPECJ2_ENSSSCG00000012905 (pp) IPECJ2_ENSSSCG00000007281	Intra	0.96044	1	7.40017e-06	14245.5	0.96044	transmembrane protein 134 [Source:HGNC Symbol;Acc:HGNC:26142]	microtubule associated protein 1 light chain 3 alpha [Source:HGNC Symbol;Acc:HGNC:6838]
IPECJ2_ENSSSCG00000025868 (pp) IPECJ2_ENSSSCG00000007472	Intra	0.964835	1	5.02606e-06	18397.5	0.964835	Unknown	breast carcinoma amplified sequence 4 [Source:HGNC Symbol;Acc:HGNC:14367]
IPECJ2_ENSSSCG00000012905 (pp) IPECJ2_ENSSSCG00000013619	Intra	0.964835	1	2.53041e-08	18397.5	0.964835	transmembrane protein 134 [Source:HGNC Symbol;Acc:HGNC:26142]	SWIM-type zinc finger 7 associated protein 1 [Source:HGNC Symbol;Acc:HGNC:26638]
IPECJ2_ENSSSCG00000012905 (pp) IPECJ2_ENSSSCG00000024254	Intra	0.964835	1	2.53041e-08	18397.5	0.964835	transmembrane protein 134 [Source:HGNC Symbol;Acc:HGNC:26142]	alkB homolog 7 [Source:HGNC Symbol;Acc:HGNC:21306]
IPECJ2_ENSSSCG00000025868 (pp) IPECJ2_ENSSSCG00000025928	Intra	0.964835	1	5.02606e-06	18397.5	0.964835	Unknown	ribosomal protein L18 [Source:HGNC Symbol;Acc:HGNC:10310]
IPECJ2_ENSSSCG00000025868 (pp) IPECJ2_ENSSSCG00000007646	Intra	0.956044	1	1.04633e-05	9305.5	0.956044	Unknown	late endosomal/lysosomal adaptor, MAPK and MTOR activator 4 [Source:HGNC Symbol;Acc:HGNC:33772]
IPECJ2_ENSSSCG00000012905 (pp) IPECJ2_ENSSSCG00000001884	Intra	0.956044	1	9.46978e-08	9305.5	0.956044	transmembrane protein 134 [Source:HGNC Symbol;Acc:HGNC:26142]	COMM domain containing 4 [Source:HGNC Symbol;Acc:HGNC:26027]
IPECJ2_XLOC_007562 (pp) IPECJ2_ENSSSCG00000000061	Intra	0.978022	1	1.07614e-06	26153.5	0.978022	Unknown	phosphomannomutase 1 [Source:HGNC Symbol;Acc:HGNC:9114]
IPECJ2_ENSSSCG00000025868 (pp) IPECJ2_ENSSSCG00000020817	Intra	0.956044	1	1.04633e-05	9305.5	0.956044	Unknown	40S ribosomal protein S16 [Source:UniProtKB/Swiss-Prot;Acc:Q29201]
IPECJ2_ENSSSCG00000012905 (pp) IPECJ2_ENSSSCG00000027308	Intra	0.956044	1	9.46978e-08	9305.5	0.956044	transmembrane protein 134 [Source:HGNC Symbol;Acc:HGNC:26142]	Unknown
IPECJ2_ENSSSCG00000025868 (pp) IPECJ2_ENSSSCG00000012784	Intra	0.96044	1	7.40017e-06	14245.5	0.96044	Unknown	signal sequence receptor subunit 4 [Source:HGNC Symbol;Acc:HGNC:11326]
IPECJ2_ENSSSCG00000012905 (pp) IPECJ2_ENSSSCG00000013267	Intra	0.96044	1	5.08105e-08	14245.5	0.96044	transmembrane protein 134 [Source:HGNC Symbol;Acc:HGNC:26142]	peroxisomal biogenesis factor 16 [Source:HGNC Symbol;Acc:HGNC:8857]
IPECJ2_ENSSSCG00000012905 (pp) IPECJ2_ENSSSCG00000025868	Intra	0.96044	1	5.08105e-08	14245.5	0.96044	transmembrane protein 134 [Source:HGNC Symbol;Acc:HGNC:26142]	Unknown
IPECJ2_ENSSSCG00000025868 (pp) IPECJ2_ENSSSCG00000002646	Intra	0.956044	1	1.04633e-05	9305.5	0.956044	Unknown	trafficking protein particle complex 2 like [Source:HGNC Symbol;Acc:HGNC:30887]
IPECJ2_XLOC_007562 (pp) IPECJ2_ENSSSCG00000023139	Intra	0.96044	1	7.40017e-06	14245.5	0.96044	Unknown	Isoform 2 of Methyltransferase-like protein 23 OS=Homo sapiens GN=METTL23
IPECJ2_ENSSSCG00000012905 (pp) IPECJ2_ENSSSCG00000027840	Intra	0.951648	1	1.66161e-07	3309.5	0.951648	transmembrane protein 134 [Source:HGNC Symbol;Acc:HGNC:26142]	Unknown
IPECJ2_XLOC_007562 (pp) IPECJ2_ENSSSCG00000024974	Intra	0.96044	1	7.40017e-06	14245.5	0.96044	Unknown	ribosomal protein L13 [Source:HGNC Symbol;Acc:HGNC:10303]
IPECJ2_ENSSSCG00000025868 (pp) IPECJ2_ENSSSCG00000027971	Intra	0.951648	1	1.66161e-07	3309.5	0.951648	Unknown	regulatory factor X associated ankyrin containing protein [Source:HGNC Symbol;Acc:HGNC:9987]
IPECJ2_ENSSSCG00000012916 (pp) IPECJ2_ENSSSCG00000026914	Intra	0.982418	1	5.27924e-07	27446.5	0.982418	Unknown	phospholipase A2 group XVI [Source:HGNC Symbol;Acc:HGNC:17825]
IPECJ2_ENSSSCG00000025868 (pp) IPECJ2_ENSSSCG00000027827	Intra	0.956044	1	9.46978e-08	9305.5	0.956044	Unknown	UDP-galactose-4-epimerase [Source:HGNC Symbol;Acc:HGNC:4116]
IPECJ2_XLOC_007562 (pp) IPECJ2_ENSSSCG00000026812	Intra	0.978022	1	1.07614e-06	26153.5	0.978022	Unknown	Unknown
IPECJ2_ENSSSCG00000012905 (pp) IPECJ2_ENSSSCG00000029161	Intra	0.956044	1	9.46978e-08	9305.5	0.956044	transmembrane protein 134 [Source:HGNC Symbol;Acc:HGNC:26142]	acireductone dioxygenase 1 [Source:HGNC Symbol;Acc:HGNC:30576]
IPECJ2_ENSSSCG00000025868 (pp) IPECJ2_ENSSSCG00000029830	Intra	0.956044	1	1.04633e-05	9305.5	0.956044	Unknown	ribosomal protein L8 [Source:HGNC Symbol;Acc:HGNC:10368]
IPECJ2_ENSSSCG00000012905 (pp) IPECJ2_ENSSSCG00000007189	Intra	0.951648	1	1.41528e-05	3309.5	0.951648	transmembrane protein 134 [Source:HGNC Symbol;Acc:HGNC:26142]	syndecan binding protein 2 [Source:HGNC Symbol;Acc:HGNC:15756]
IPECJ2_XLOC_007562 (pp) IPECJ2_ENSSSCG00000004970	Intra	0.964835	1	5.02606e-06	18397.5	0.964835	Unknown	Unknown
IPECJ2_ENSSSCG00000012916 (pp) IPECJ2_ENSSSCG00000020817	Intra	0.978022	1	1.07614e-06	26153.5	0.978022	Unknown	40S ribosomal protein S16 [Source:UniProtKB/Swiss-Prot;Acc:Q29201]
IPECJ2_XLOC_007562 (pp) IPECJ2_ENSSSCG00000012965	Intra	0.956044	1	1.04633e-05	9305.5	0.956044	Unknown	DR1 associated protein 1 [Source:HGNC Symbol;Acc:HGNC:3019]
IPECJ2_ENSSSCG00000025869 (pp) IPECJ2_ENSSSCG00000000061	Intra	0.96044	1	5.08105e-08	14245.5	0.96044	Unknown	phosphomannomutase 1 [Source:HGNC Symbol;Acc:HGNC:9114]
IPECJ2_ENSSSCG00000012916 (pp) IPECJ2_ENSSSCG00000027971	Intra	0.978022	1	1.55196e-09	26153.5	0.978022	Unknown	regulatory factor X associated ankyrin containing protein [Source:HGNC Symbol;Acc:HGNC:9987]
IPECJ2_ENSSSCG00000009077 (pp) IPECJ2_ENSSSCG00000005173	Intra	0.969231	1	1.14652e-08	21732.5	0.969231	heat shock protein family A (Hsp70) member 4 like [Source:HGNC Symbol;Acc:HGNC:17041]	HAUS augmin like complex subunit 6 [Source:HGNC Symbol;Acc:HGNC:25948]
IPECJ2_ENSSSCG00000012916 (pp) IPECJ2_ENSSSCG00000007160	Intra	0.978022	1	1.07614e-06	26153.5	0.978022	Unknown	DDRGK domain containing 1 [Source:HGNC Symbol;Acc:HGNC:16110]
IPECJ2_XLOC_007562 (pp) IPECJ2_ENSSSCG00000010063	Intra	0.956044	1	1.04633e-05	9305.5	0.956044	Unknown	Macrophage migration inhibitory factor OS=Sus scrofa GN=MIF PE=1 SV=3
IPECJ2_ENSSSCG00000012916 (pp) IPECJ2_ENSSSCG00000012960	Intra	0.978022	1	1.07614e-06	26153.5	0.978022	Unknown	cystatin E/M [Source:HGNC Symbol;Acc:HGNC:2478]
IPECJ2_ENSSSCG00000012916 (pp) IPECJ2_ENSSSCG00000000061	Intra	0.969231	1	3.28443e-06	21732.5	0.969231	Unknown	phosphomannomutase 1 [Source:HGNC Symbol;Acc:HGNC:9114]
IPECJ2_ENSSSCG00000025869 (pp) IPECJ2_ENSSSCG00000014177	Intra	0.956044	-1	9.46978e-08	9305.5	-0.956044	Unknown	chromodomain helicase DNA binding protein 1 [Source:HGNC Symbol;Acc:HGNC:1915]
IPECJ2_XLOC_007562 (pp) IPECJ2_ENSSSCG00000012784	Intra	0.951648	1	1.41528e-05	3309.5	0.951648	Unknown	signal sequence receptor subunit 4 [Source:HGNC Symbol;Acc:HGNC:11326]
IPECJ2_ENSSSCG00000025869 (pp) AscL3_gene_GS_12056	Inter	0.951648	1	1.41528e-05	3309.5	0.951648	Unknown	Elongation of very long chain fatty acids protein OS=Ascaris suum GN=ASU_11627 PE=3 SV=1
IPECJ2_ENSSSCG00000012916 (pp) IPECJ2_ENSSSCG00000004970	Intra	0.969231	1	3.28443e-06	21732.5	0.969231	Unknown	Unknown
IPECJ2_ENSSSCG00000025869 (pp) IPECJ2_ENSSSCG00000012960	Intra	0.96044	1	5.08105e-08	14245.5	0.96044	Unknown	cystatin E/M [Source:HGNC Symbol;Acc:HGNC:2478]
IPECJ2_ENSSSCG00000012916 (pp) IPECJ2_ENSSSCG00000012784	Intra	0.973626	1	1.97568e-06	24252.5	0.973626	Unknown	signal sequence receptor subunit 4 [Source:HGNC Symbol;Acc:HGNC:11326]
IPECJ2_ENSSSCG00000012916 (pp) IPECJ2_ENSSSCG00000026812	Intra	0.973626	1	1.97568e-06	24252.5	0.973626	Unknown	Unknown
IPECJ2_XLOC_007562 (pp) IPECJ2_ENSSSCG00000027971	Intra	0.956044	1	9.46978e-08	9305.5	0.956044	Unknown	regulatory factor X associated ankyrin containing protein [Source:HGNC Symbol;Acc:HGNC:9987]
IPECJ2_ENSSSCG00000012916 (pp) IPECJ2_ENSSSCG00000012842	Intra	0.964835	1	5.02606e-06	18397.5	0.964835	Unknown	Unknown
IPECJ2_XLOC_007562 (pp) IPECJ2_ENSSSCG00000029362	Intra	0.951648	1	1.41528e-05	3309.5	0.951648	Unknown	charged multivesicular body protein 2A [Source:HGNC Symbol;Acc:HGNC:30216]
IPECJ2_ENSSSCG00000025928 (pp) IPECJ2_ENSSSCG00000029362	Intra	0.991209	1	6.5401e-12	28659.5	0.991209	ribosomal protein L18 [Source:HGNC Symbol;Acc:HGNC:10310]	charged multivesicular body protein 2A [Source:HGNC Symbol;Acc:HGNC:30216]
IPECJ2_ENSSSCG00000012916 (pp) IPECJ2_ENSSSCG00000014177	Intra	0.964835	-1	5.02606e-06	18397.5	-0.964835	Unknown	chromodomain helicase DNA binding protein 1 [Source:HGNC Symbol;Acc:HGNC:1915]
IPECJ2_ENSSSCG00000025869 (pp) IPECJ2_XLOC_007562	Intra	0.951648	1	1.66161e-07	3309.5	0.951648	Unknown	Unknown
IPECJ2_XLOC_007562 (pp) IPECJ2_ENSSSCG00000025928	Intra	0.951648	1	1.41528e-05	3309.5	0.951648	Unknown	ribosomal protein L18 [Source:HGNC Symbol;Acc:HGNC:10310]
IPECJ2_ENSSSCG00000012916 (pp) IPECJ2_ENSSSCG00000020790	Intra	0.969231	1	3.28443e-06	21732.5	0.969231	Unknown	Uncharacterized protein OS=Sus scrofa GN=MYEOV2 PE=1 SV=1
IPECJ2_ENSSSCG00000009077 (pp) IPECJ2_XLOC_000015	Intra	0.956044	-1	9.46978e-08	9305.5	-0.956044	heat shock protein family A (Hsp70) member 4 like [Source:HGNC Symbol;Acc:HGNC:17041]	Mitochondrial pyruvate carrier 1 OS=Bos taurus GN=MPC1 PE=1 SV=1
IPECJ2_ENSSSCG00000025928 (pp) IPECJ2_ENSSSCG00000029034	Intra	1	1	0	29666	1	ribosomal protein L18 [Source:HGNC Symbol;Acc:HGNC:10310]	cytochrome c oxidase subunit 4I1 [Source:HGNC Symbol;Acc:HGNC:2265]
IPECJ2_XLOC_007562 (pp) IPECJ2_ENSSSCG00000029034	Intra	0.951648	1	1.41528e-05	3309.5	0.951648	Unknown	cytochrome c oxidase subunit 4I1 [Source:HGNC Symbol;Acc:HGNC:2265]
IPECJ2_ENSSSCG00000012916 (pp) IPECJ2_ENSSSCG00000029362	Intra	0.969231	1	3.28443e-06	21732.5	0.969231	Unknown	charged multivesicular body protein 2A [Source:HGNC Symbol;Acc:HGNC:30216]
IPECJ2_ENSSSCG00000025928 (pp) IPECJ2_ENSSSCG00000026812	Intra	0.973626	1	4.59028e-09	24252.5	0.973626	ribosomal protein L18 [Source:HGNC Symbol;Acc:HGNC:10310]	Unknown
IPECJ2_ENSSSCG00000025928 (pp) IPECJ2_ENSSSCG00000027971	Intra	0.973626	1	4.59028e-09	24252.5	0.973626	ribosomal protein L18 [Source:HGNC Symbol;Acc:HGNC:10310]	regulatory factor X associated ankyrin containing protein [Source:HGNC Symbol;Acc:HGNC:9987]
IPECJ2_ENSSSCG00000012916 (pp) IPECJ2_ENSSSCG00000016395	Intra	0.96044	-1	7.40017e-06	14245.5	-0.96044	Unknown	replication timing regulatory factor 1 [Source:HGNC Symbol;Acc:HGNC:23207]
IPECJ2_ENSSSCG00000012916 (pp) IPECJ2_ENSSSCG00000007646	Intra	0.96044	1	7.40017e-06	14245.5	0.96044	Unknown	late endosomal/lysosomal adaptor, MAPK and MTOR activator 4 [Source:HGNC Symbol;Acc:HGNC:33772]
IPECJ2_ENSSSCG00000025928 (pp) IPECJ2_ENSSSCG00000024974	Intra	0.973626	1	1.97568e-06	24252.5	0.973626	ribosomal protein L18 [Source:HGNC Symbol;Acc:HGNC:10310]	ribosomal protein L13 [Source:HGNC Symbol;Acc:HGNC:10303]
IPECJ2_ENSSSCG00000012916 (pp) IPECJ2_ENSSSCG00000012965	Intra	0.96044	1	7.40017e-06	14245.5	0.96044	Unknown	DR1 associated protein 1 [Source:HGNC Symbol;Acc:HGNC:3019]
IPECJ2_ENSSSCG00000001884 (pp) IPECJ2_ENSSSCG00000013267	Intra	0.978022	1	1.07614e-06	26153.5	0.978022	COMM domain containing 4 [Source:HGNC Symbol;Acc:HGNC:26027]	peroxisomal biogenesis factor 16 [Source:HGNC Symbol;Acc:HGNC:8857]
IPECJ2_ENSSSCG00000001884 (pp) IPECJ2_ENSSSCG00000027840	Intra	0.978022	1	1.55196e-09	26153.5	0.978022	COMM domain containing 4 [Source:HGNC Symbol;Acc:HGNC:26027]	Unknown
IPECJ2_ENSSSCG00000012916 (pp) IPECJ2_ENSSSCG00000027840	Intra	0.956044	1	1.04633e-05	9305.5	0.956044	Unknown	Unknown
IPECJ2_ENSSSCG00000025928 (pp) IPECJ2_XLOC_029898	Intra	0.973626	1	4.59028e-09	24252.5	0.973626	ribosomal protein L18 [Source:HGNC Symbol;Acc:HGNC:10310]	Proteasome subunit beta type-7 OS=Sus scrofa GN=PSMB7 PE=2 SV=2
IPECJ2_ENSSSCG00000012916 (pp) IPECJ2_ENSSSCG00000000921	Intra	0.956044	-1	1.04633e-05	9305.5	-0.956044	Unknown	Unknown
IPECJ2_ENSSSCG00000001884 (pp) IPECJ2_ENSSSCG00000029161	Intra	0.982418	1	4.10718e-10	27446.5	0.982418	COMM domain containing 4 [Source:HGNC Symbol;Acc:HGNC:26027]	acireductone dioxygenase 1 [Source:HGNC Symbol;Acc:HGNC:30576]
IPECJ2_ENSSSCG00000025928 (pp) IPECJ2_ENSSSCG00000019018	Intra	0.969231	1	3.28443e-06	21732.5	0.969231	ribosomal protein L18 [Source:HGNC Symbol;Acc:HGNC:10310]	Unknown
IPECJ2_ENSSSCG00000001884 (pp) IPECJ2_ENSSSCG00000012965	Intra	0.978022	1	1.55196e-09	26153.5	0.978022	COMM domain containing 4 [Source:HGNC Symbol;Acc:HGNC:26027]	DR1 associated protein 1 [Source:HGNC Symbol;Acc:HGNC:3019]
IPECJ2_ENSSSCG00000001884 (pp) IPECJ2_ENSSSCG00000025928	Intra	0.973626	1	4.59028e-09	24252.5	0.973626	COMM domain containing 4 [Source:HGNC Symbol;Acc:HGNC:26027]	ribosomal protein L18 [Source:HGNC Symbol;Acc:HGNC:10310]
IPECJ2_ENSSSCG00000012916 (pp) IPECJ2_ENSSSCG00000025928	Intra	0.951648	1	1.41528e-05	3309.5	0.951648	Unknown	ribosomal protein L18 [Source:HGNC Symbol;Acc:HGNC:10310]
IPECJ2_ENSSSCG00000001884 (pp) IPECJ2_ENSSSCG00000029034	Intra	0.973626	1	4.59028e-09	24252.5	0.973626	COMM domain containing 4 [Source:HGNC Symbol;Acc:HGNC:26027]	cytochrome c oxidase subunit 4I1 [Source:HGNC Symbol;Acc:HGNC:2265]
IPECJ2_ENSSSCG00000012916 (pp) IPECJ2_ENSSSCG00000029034	Intra	0.951648	1	1.41528e-05	3309.5	0.951648	Unknown	cytochrome c oxidase subunit 4I1 [Source:HGNC Symbol;Acc:HGNC:2265]
IPECJ2_ENSSSCG00000025928 (pp) IPECJ2_ENSSSCG00000017705	Intra	0.96044	1	7.40017e-06	14245.5	0.96044	ribosomal protein L18 [Source:HGNC Symbol;Acc:HGNC:10310]	C-C motif chemokine ligand 5 [Source:HGNC Symbol;Acc:HGNC:10632]
IPECJ2_ENSSSCG00000001884 (pp) IPECJ2_ENSSSCG00000006777	Intra	0.973626	1	4.59028e-09	24252.5	0.973626	COMM domain containing 4 [Source:HGNC Symbol;Acc:HGNC:26027]	ras homolog family member C [Source:HGNC Symbol;Acc:HGNC:669]
IPECJ2_ENSSSCG00000012916 (pp) IPECJ2_ENSSSCG00000007472	Intra	0.951648	1	1.41528e-05	3309.5	0.951648	Unknown	breast carcinoma amplified sequence 4 [Source:HGNC Symbol;Acc:HGNC:14367]
IPECJ2_ENSSSCG00000012916 (pp) IPECJ2_ENSSSCG00000024974	Intra	0.951648	1	1.41528e-05	3309.5	0.951648	Unknown	ribosomal protein L13 [Source:HGNC Symbol;Acc:HGNC:10303]
IPECJ2_ENSSSCG00000025928 (pp) IPECJ2_ENSSSCG00000027353	Intra	0.96044	1	5.08105e-08	14245.5	0.96044	ribosomal protein L18 [Source:HGNC Symbol;Acc:HGNC:10310]	Unknown
IPECJ2_ENSSSCG00000001884 (pp) IPECJ2_ENSSSCG00000007472	Intra	0.973626	1	1.97568e-06	24252.5	0.973626	COMM domain containing 4 [Source:HGNC Symbol;Acc:HGNC:26027]	breast carcinoma amplified sequence 4 [Source:HGNC Symbol;Acc:HGNC:14367]
IPECJ2_ENSSSCG00000001884 (pp) IPECJ2_ENSSSCG00000012960	Intra	0.969231	1	1.14652e-08	21732.5	0.969231	COMM domain containing 4 [Source:HGNC Symbol;Acc:HGNC:26027]	cystatin E/M [Source:HGNC Symbol;Acc:HGNC:2478]
IPECJ2_ENSSSCG00000012960 (pp) IPECJ2_ENSSSCG00000012784	Intra	0.978022	1	1.07614e-06	26153.5	0.978022	cystatin E/M [Source:HGNC Symbol;Acc:HGNC:2478]	signal sequence receptor subunit 4 [Source:HGNC Symbol;Acc:HGNC:11326]
IPECJ2_ENSSSCG00000029034 (pp) IPECJ2_ENSSSCG00000024974	Intra	0.973626	1	1.97568e-06	24252.5	0.973626	cytochrome c oxidase subunit 4I1 [Source:HGNC Symbol;Acc:HGNC:2265]	ribosomal protein L13 [Source:HGNC Symbol;Acc:HGNC:10303]
IPECJ2_ENSSSCG00000012960 (pp) IPECJ2_ENSSSCG00000012965	Intra	0.973626	1	1.97568e-06	24252.5	0.973626	cystatin E/M [Source:HGNC Symbol;Acc:HGNC:2478]	DR1 associated protein 1 [Source:HGNC Symbol;Acc:HGNC:3019]
IPECJ2_ENSSSCG00000012916 (pp) IPECJ2_ENSSSCG00000029161	Intra	0.951648	1	1.41528e-05	3309.5	0.951648	Unknown	acireductone dioxygenase 1 [Source:HGNC Symbol;Acc:HGNC:30576]
IPECJ2_ENSSSCG00000029034 (pp) IPECJ2_ENSSSCG00000029362	Intra	0.991209	1	6.5401e-12	28659.5	0.991209	cytochrome c oxidase subunit 4I1 [Source:HGNC Symbol;Acc:HGNC:2265]	charged multivesicular body protein 2A [Source:HGNC Symbol;Acc:HGNC:30216]
IPECJ2_ENSSSCG00000001884 (pp) IPECJ2_ENSSSCG00000012784	Intra	0.969231	1	3.28443e-06	21732.5	0.969231	COMM domain containing 4 [Source:HGNC Symbol;Acc:HGNC:26027]	signal sequence receptor subunit 4 [Source:HGNC Symbol;Acc:HGNC:11326]
IPECJ2_ENSSSCG00000012916 (pp) IPECJ2_XLOC_007562	Intra	0.951648	1	1.41528e-05	3309.5	0.951648	Unknown	Unknown
IPECJ2_ENSSSCG00000029034 (pp) IPECJ2_XLOC_029898	Intra	0.973626	1	1.97568e-06	24252.5	0.973626	cytochrome c oxidase subunit 4I1 [Source:HGNC Symbol;Acc:HGNC:2265]	Proteasome subunit beta type-7 OS=Sus scrofa GN=PSMB7 PE=2 SV=2
IPECJ2_ENSSSCG00000001884 (pp) IPECJ2_ENSSSCG00000020817	Intra	0.964835	1	5.02606e-06	18397.5	0.964835	COMM domain containing 4 [Source:HGNC Symbol;Acc:HGNC:26027]	40S ribosomal protein S16 [Source:UniProtKB/Swiss-Prot;Acc:Q29201]
IPECJ2_ENSSSCG00000012960 (pp) IPECJ2_ENSSSCG00000027840	Intra	0.973626	1	4.59028e-09	24252.5	0.973626	cystatin E/M [Source:HGNC Symbol;Acc:HGNC:2478]	Unknown
IPECJ2_ENSSSCG00000029034 (pp) IPECJ2_ENSSSCG00000019018	Intra	0.969231	1	3.28443e-06	21732.5	0.969231	cytochrome c oxidase subunit 4I1 [Source:HGNC Symbol;Acc:HGNC:2265]	Unknown
IPECJ2_ENSSSCG00000001884 (pp) IPECJ2_ENSSSCG00000027971	Intra	0.964835	1	2.53041e-08	18397.5	0.964835	COMM domain containing 4 [Source:HGNC Symbol;Acc:HGNC:26027]	regulatory factor X associated ankyrin containing protein [Source:HGNC Symbol;Acc:HGNC:9987]
IPECJ2_ENSSSCG00000012960 (pp) IPECJ2_ENSSSCG00000027971	Intra	0.973626	1	4.59028e-09	24252.5	0.973626	cystatin E/M [Source:HGNC Symbol;Acc:HGNC:2478]	regulatory factor X associated ankyrin containing protein [Source:HGNC Symbol;Acc:HGNC:9987]
IPECJ2_ENSSSCG00000029034 (pp) IPECJ2_ENSSSCG00000026812	Intra	0.973626	1	1.97568e-06	24252.5	0.973626	cytochrome c oxidase subunit 4I1 [Source:HGNC Symbol;Acc:HGNC:2265]	Unknown
IPECJ2_ENSSSCG00000012960 (pp) IPECJ2_ENSSSCG00000020817	Intra	0.973626	1	1.97568e-06	24252.5	0.973626	cystatin E/M [Source:HGNC Symbol;Acc:HGNC:2478]	40S ribosomal protein S16 [Source:UniProtKB/Swiss-Prot;Acc:Q29201]
IPECJ2_ENSSSCG00000029034 (pp) IPECJ2_ENSSSCG00000027971	Intra	0.973626	1	4.59028e-09	24252.5	0.973626	cytochrome c oxidase subunit 4I1 [Source:HGNC Symbol;Acc:HGNC:2265]	regulatory factor X associated ankyrin containing protein [Source:HGNC Symbol;Acc:HGNC:9987]
IPECJ2_ENSSSCG00000012960 (pp) IPECJ2_ENSSSCG00000026914	Intra	0.973626	1	4.59028e-09	24252.5	0.973626	cystatin E/M [Source:HGNC Symbol;Acc:HGNC:2478]	phospholipase A2 group XVI [Source:HGNC Symbol;Acc:HGNC:17825]
IPECJ2_ENSSSCG00000001884 (pp) IPECJ2_ENSSSCG00000007189	Intra	0.964835	1	5.02606e-06	18397.5	0.964835	COMM domain containing 4 [Source:HGNC Symbol;Acc:HGNC:26027]	syndecan binding protein 2 [Source:HGNC Symbol;Acc:HGNC:15756]
IPECJ2_ENSSSCG00000001884 (pp) IPECJ2_ENSSSCG00000007646	Intra	0.96044	1	7.40017e-06	14245.5	0.96044	COMM domain containing 4 [Source:HGNC Symbol;Acc:HGNC:26027]	late endosomal/lysosomal adaptor, MAPK and MTOR activator 4 [Source:HGNC Symbol;Acc:HGNC:33772]
IPECJ2_ENSSSCG00000029034 (pp) IPECJ2_ENSSSCG00000017705	Intra	0.96044	1	7.40017e-06	14245.5	0.96044	cytochrome c oxidase subunit 4I1 [Source:HGNC Symbol;Acc:HGNC:2265]	C-C motif chemokine ligand 5 [Source:HGNC Symbol;Acc:HGNC:10632]
IPECJ2_ENSSSCG00000012960 (pp) IPECJ2_ENSSSCG00000026812	Intra	0.969231	1	3.28443e-06	21732.5	0.969231	cystatin E/M [Source:HGNC Symbol;Acc:HGNC:2478]	Unknown
IPECJ2_ENSSSCG00000012960 (pp) IPECJ2_ENSSSCG00000007646	Intra	0.964835	1	5.02606e-06	18397.5	0.964835	cystatin E/M [Source:HGNC Symbol;Acc:HGNC:2478]	late endosomal/lysosomal adaptor, MAPK and MTOR activator 4 [Source:HGNC Symbol;Acc:HGNC:33772]
IPECJ2_ENSSSCG00000029034 (pp) IPECJ2_ENSSSCG00000027353	Intra	0.96044	1	7.40017e-06	14245.5	0.96044	cytochrome c oxidase subunit 4I1 [Source:HGNC Symbol;Acc:HGNC:2265]	Unknown
IPECJ2_ENSSSCG00000001884 (pp) IPECJ2_ENSSSCG00000029362	Intra	0.96044	1	5.08105e-08	14245.5	0.96044	COMM domain containing 4 [Source:HGNC Symbol;Acc:HGNC:26027]	charged multivesicular body protein 2A [Source:HGNC Symbol;Acc:HGNC:30216]
IPECJ2_ENSSSCG00000012960 (pp) IPECJ2_ENSSSCG00000000061	Intra	0.969231	1	3.28443e-06	21732.5	0.969231	cystatin E/M [Source:HGNC Symbol;Acc:HGNC:2478]	phosphomannomutase 1 [Source:HGNC Symbol;Acc:HGNC:9114]
IPECJ2_ENSSSCG00000001884 (pp) IPECJ2_ENSSSCG00000029830	Intra	0.964835	1	2.53041e-08	18397.5	0.964835	COMM domain containing 4 [Source:HGNC Symbol;Acc:HGNC:26027]	ribosomal protein L8 [Source:HGNC Symbol;Acc:HGNC:10368]
IPECJ2_ENSSSCG00000001884 (pp) IPECJ2_ENSSSCG00000002646	Intra	0.96044	1	7.40017e-06	14245.5	0.96044	COMM domain containing 4 [Source:HGNC Symbol;Acc:HGNC:26027]	trafficking protein particle complex 2 like [Source:HGNC Symbol;Acc:HGNC:30887]
IPECJ2_ENSSSCG00000012960 (pp) IPECJ2_ENSSSCG00000014177	Intra	0.969231	-1	3.28443e-06	21732.5	-0.969231	cystatin E/M [Source:HGNC Symbol;Acc:HGNC:2478]	chromodomain helicase DNA binding protein 1 [Source:HGNC Symbol;Acc:HGNC:1915]
IPECJ2_ENSSSCG00000009217 (pp) IPECJ2_ENSSSCG00000023334	Intra	0.969231	1	3.28443e-06	21732.5	0.969231	polycystin 2, transient receptor potential cation channel [Source:HGNC Symbol;Acc:HGNC:9009]	Uncharacterized protein OS=Sus scrofa GN=CXorf23 PE=4 SV=1
IPECJ2_ENSSSCG00000012960 (pp) IPECJ2_ENSSSCG00000016395	Intra	0.96044	-1	5.08105e-08	14245.5	-0.96044	cystatin E/M [Source:HGNC Symbol;Acc:HGNC:2478]	replication timing regulatory factor 1 [Source:HGNC Symbol;Acc:HGNC:23207]
IPECJ2_ENSSSCG00000009217 (pp) AscL3_gene_L3E_01572	Inter	0.956044	1	1.04633e-05	9305.5	0.956044	polycystin 2, transient receptor potential cation channel [Source:HGNC Symbol;Acc:HGNC:9009]	Bm1034 OS=Brugia malayi GN=Bm1034 PE=4 SV=1
IPECJ2_ENSSSCG00000012960 (pp) IPECJ2_ENSSSCG00000025868	Intra	0.96044	1	7.40017e-06	14245.5	0.96044	cystatin E/M [Source:HGNC Symbol;Acc:HGNC:2478]	Unknown
IPECJ2_ENSSSCG00000001884 (pp) IPECJ2_ENSSSCG00000012727	Intra	0.951648	-1	1.66161e-07	3309.5	-0.951648	COMM domain containing 4 [Source:HGNC Symbol;Acc:HGNC:26027]	fragile X mental retardation 1 [Source:HGNC Symbol;Acc:HGNC:3775]
IPECJ2_ENSSSCG00000012960 (pp) IPECJ2_ENSSSCG00000029161	Intra	0.964835	1	2.53041e-08	18397.5	0.964835	cystatin E/M [Source:HGNC Symbol;Acc:HGNC:2478]	acireductone dioxygenase 1 [Source:HGNC Symbol;Acc:HGNC:30576]
IPECJ2_ENSSSCG00000001884 (pp) IPECJ2_ENSSSCG00000024974	Intra	0.956044	1	9.46978e-08	9305.5	0.956044	COMM domain containing 4 [Source:HGNC Symbol;Acc:HGNC:26027]	ribosomal protein L13 [Source:HGNC Symbol;Acc:HGNC:10303]
IPECJ2_ENSSSCG00000012960 (pp) IPECJ2_ENSSSCG00000013619	Intra	0.956044	1	1.04633e-05	9305.5	0.956044	cystatin E/M [Source:HGNC Symbol;Acc:HGNC:2478]	SWIM-type zinc finger 7 associated protein 1 [Source:HGNC Symbol;Acc:HGNC:26638]
IPECJ2_ENSSSCG00000009217 (pp) IPECJ2_ENSSSCG00000025868	Intra	0.951648	-1	1.41528e-05	3309.5	-0.951648	polycystin 2, transient receptor potential cation channel [Source:HGNC Symbol;Acc:HGNC:9009]	Unknown
IPECJ2_ENSSSCG00000001884 (pp) IPECJ2_ENSSSCG00000020790	Intra	0.951648	1	1.41528e-05	3309.5	0.951648	COMM domain containing 4 [Source:HGNC Symbol;Acc:HGNC:26027]	Uncharacterized protein OS=Sus scrofa GN=MYEOV2 PE=1 SV=1
IPECJ2_ENSSSCG00000012960 (pp) IPECJ2_ENSSSCG00000020790	Intra	0.956044	1	1.04633e-05	9305.5	0.956044	cystatin E/M [Source:HGNC Symbol;Acc:HGNC:2478]	Uncharacterized protein OS=Sus scrofa GN=MYEOV2 PE=1 SV=1
IPECJ2_ENSSSCG00000009217 (pp) IPECJ2_ENSSSCG00000001884	Intra	0.956044	-1	1.04633e-05	9305.5	-0.956044	polycystin 2, transient receptor potential cation channel [Source:HGNC Symbol;Acc:HGNC:9009]	COMM domain containing 4 [Source:HGNC Symbol;Acc:HGNC:26027]
IPECJ2_ENSSSCG00000001884 (pp) IPECJ2_ENSSSCG00000012842	Intra	0.951648	1	1.41528e-05	3309.5	0.951648	COMM domain containing 4 [Source:HGNC Symbol;Acc:HGNC:26027]	Unknown
IPECJ2_ENSSSCG00000012960 (pp) IPECJ2_ENSSSCG00000006777	Intra	0.956044	1	1.04633e-05	9305.5	0.956044	cystatin E/M [Source:HGNC Symbol;Acc:HGNC:2478]	ras homolog family member C [Source:HGNC Symbol;Acc:HGNC:669]
IPECJ2_ENSSSCG00000009217 (pp) IPECJ2_ENSSSCG00000016835	Intra	0.956044	1	1.04633e-05	9305.5	0.956044	polycystin 2, transient receptor potential cation channel [Source:HGNC Symbol;Acc:HGNC:9009]	S-phase kinase-associated protein 2, E3 ubiquitin protein ligase [Source:HGNC Symbol;Acc:HGNC:10901]
IPECJ2_ENSSSCG00000012960 (pp) IPECJ2_ENSSSCG00000013267	Intra	0.956044	1	1.04633e-05	9305.5	0.956044	cystatin E/M [Source:HGNC Symbol;Acc:HGNC:2478]	peroxisomal biogenesis factor 16 [Source:HGNC Symbol;Acc:HGNC:8857]
IPECJ2_ENSSSCG00000001884 (pp) IPECJ2_XLOC_029898	Intra	0.951648	1	1.66161e-07	3309.5	0.951648	COMM domain containing 4 [Source:HGNC Symbol;Acc:HGNC:26027]	Proteasome subunit beta type-7 OS=Sus scrofa GN=PSMB7 PE=2 SV=2
IPECJ2_ENSSSCG00000012960 (pp) IPECJ2_ENSSSCG00000007472	Intra	0.951648	1	1.41528e-05	3309.5	0.951648	cystatin E/M [Source:HGNC Symbol;Acc:HGNC:2478]	breast carcinoma amplified sequence 4 [Source:HGNC Symbol;Acc:HGNC:14367]
IPECJ2_ENSSSCG00000012960 (pp) IPECJ2_ENSSSCG00000025928	Intra	0.951648	1	1.41528e-05	3309.5	0.951648	cystatin E/M [Source:HGNC Symbol;Acc:HGNC:2478]	ribosomal protein L18 [Source:HGNC Symbol;Acc:HGNC:10310]
IPECJ2_ENSSSCG00000001922 (pp) IPECJ2_ENSSSCG00000014076	Intra	0.991209	1	4.46942e-08	28659.5	0.991209	ariadne RBR E3 ubiquitin protein ligase 1 [Source:HGNC Symbol;Acc:HGNC:689]	Isoform 2 of Soluble lamin-associated protein of 75 kDa OS=Homo sapiens GN=FAM169A
IPECJ2_ENSSSCG00000012960 (pp) IPECJ2_ENSSSCG00000022647	Intra	0.956044	1	1.04633e-05	9305.5	0.956044	cystatin E/M [Source:HGNC Symbol;Acc:HGNC:2478]	translocase of inner mitochondrial membrane 17 homolog B (yeast) [Source:HGNC Symbol;Acc:HGNC:17310]
IPECJ2_ENSSSCG00000001884 (pp) IPECJ2_ENSSSCG00000026812	Intra	0.951648	1	1.66161e-07	3309.5	0.951648	COMM domain containing 4 [Source:HGNC Symbol;Acc:HGNC:26027]	Unknown
IPECJ2_ENSSSCG00000012960 (pp) IPECJ2_XLOC_007562	Intra	0.956044	1	9.46978e-08	9305.5	0.956044	cystatin E/M [Source:HGNC Symbol;Acc:HGNC:2478]	Unknown
IPECJ2_ENSSSCG00000012965 (pp) IPECJ2_ENSSSCG00000027971	Intra	0.991209	1	6.5401e-12	28659.5	0.991209	DR1 associated protein 1 [Source:HGNC Symbol;Acc:HGNC:3019]	regulatory factor X associated ankyrin containing protein [Source:HGNC Symbol;Acc:HGNC:9987]
IPECJ2_ENSSSCG00000012965 (pp) IPECJ2_ENSSSCG00000020817	Intra	0.986813	1	1.88722e-07	28223.5	0.986813	DR1 associated protein 1 [Source:HGNC Symbol;Acc:HGNC:3019]	40S ribosomal protein S16 [Source:UniProtKB/Swiss-Prot;Acc:Q29201]
IPECJ2_ENSSSCG00000012960 (pp) IPECJ2_ENSSSCG00000029034	Intra	0.951648	1	1.41528e-05	3309.5	0.951648	cystatin E/M [Source:HGNC Symbol;Acc:HGNC:2478]	cytochrome c oxidase subunit 4I1 [Source:HGNC Symbol;Acc:HGNC:2265]
IPECJ2_ENSSSCG00000001922 (pp) IPECJ2_ENSSSCG00000017308	Intra	0.991209	1	6.5401e-12	28659.5	0.991209	ariadne RBR E3 ubiquitin protein ligase 1 [Source:HGNC Symbol;Acc:HGNC:689]	cell division cycle 27 [Source:HGNC Symbol;Acc:HGNC:1728]
IPECJ2_ENSSSCG00000012960 (pp) IPECJ2_ENSSSCG00000029362	Intra	0.951648	1	1.41528e-05	3309.5	0.951648	cystatin E/M [Source:HGNC Symbol;Acc:HGNC:2478]	charged multivesicular body protein 2A [Source:HGNC Symbol;Acc:HGNC:30216]
IPECJ2_ENSSSCG00000012965 (pp) IPECJ2_ENSSSCG00000020790	Intra	0.982418	1	5.27924e-07	27446.5	0.982418	DR1 associated protein 1 [Source:HGNC Symbol;Acc:HGNC:3019]	Uncharacterized protein OS=Sus scrofa GN=MYEOV2 PE=1 SV=1
IPECJ2_ENSSSCG00000012965 (pp) IPECJ2_ENSSSCG00000024974	Intra	0.982418	1	5.27924e-07	27446.5	0.982418	DR1 associated protein 1 [Source:HGNC Symbol;Acc:HGNC:3019]	ribosomal protein L13 [Source:HGNC Symbol;Acc:HGNC:10303]
IPECJ2_ENSSSCG00000001922 (pp) IPECJ2_ENSSSCG00000016098	Intra	0.982418	1	4.10718e-10	27446.5	0.982418	ariadne RBR E3 ubiquitin protein ligase 1 [Source:HGNC Symbol;Acc:HGNC:689]	Unknown
IPECJ2_ENSSSCG00000012965 (pp) IPECJ2_ENSSSCG00000029161	Intra	0.986813	1	7.37952e-11	28223.5	0.986813	DR1 associated protein 1 [Source:HGNC Symbol;Acc:HGNC:3019]	acireductone dioxygenase 1 [Source:HGNC Symbol;Acc:HGNC:30576]
IPECJ2_ENSSSCG00000012965 (pp) IPECJ2_ENSSSCG00000029034	Intra	0.982418	1	4.10718e-10	27446.5	0.982418	DR1 associated protein 1 [Source:HGNC Symbol;Acc:HGNC:3019]	cytochrome c oxidase subunit 4I1 [Source:HGNC Symbol;Acc:HGNC:2265]
IPECJ2_ENSSSCG00000012965 (pp) IPECJ2_XLOC_029898	Intra	0.982418	1	5.27924e-07	27446.5	0.982418	DR1 associated protein 1 [Source:HGNC Symbol;Acc:HGNC:3019]	Proteasome subunit beta type-7 OS=Sus scrofa GN=PSMB7 PE=2 SV=2
IPECJ2_ENSSSCG00000012965 (pp) IPECJ2_ENSSSCG00000025928	Intra	0.982418	1	5.27924e-07	27446.5	0.982418	DR1 associated protein 1 [Source:HGNC Symbol;Acc:HGNC:3019]	ribosomal protein L18 [Source:HGNC Symbol;Acc:HGNC:10310]
IPECJ2_ENSSSCG00000012965 (pp) IPECJ2_ENSSSCG00000026812	Intra	0.982418	1	4.10718e-10	27446.5	0.982418	DR1 associated protein 1 [Source:HGNC Symbol;Acc:HGNC:3019]	Unknown
IPECJ2_ENSSSCG00000012965 (pp) IPECJ2_ENSSSCG00000019018	Intra	0.978022	1	1.07614e-06	26153.5	0.978022	DR1 associated protein 1 [Source:HGNC Symbol;Acc:HGNC:3019]	Unknown
IPECJ2_ENSSSCG00000012965 (pp) IPECJ2_ENSSSCG00000021825	Intra	0.973626	1	1.97568e-06	24252.5	0.973626	DR1 associated protein 1 [Source:HGNC Symbol;Acc:HGNC:3019]	40S ribosomal protein S21 [Source:UniProtKB/Swiss-Prot;Acc:P63221]
IPECJ2_ENSSSCG00000012965 (pp) IPECJ2_ENSSSCG00000013267	Intra	0.978022	1	1.07614e-06	26153.5	0.978022	DR1 associated protein 1 [Source:HGNC Symbol;Acc:HGNC:3019]	peroxisomal biogenesis factor 16 [Source:HGNC Symbol;Acc:HGNC:8857]
IPECJ2_ENSSSCG00000012965 (pp) IPECJ2_ENSSSCG00000017705	Intra	0.978022	1	1.07614e-06	26153.5	0.978022	DR1 associated protein 1 [Source:HGNC Symbol;Acc:HGNC:3019]	C-C motif chemokine ligand 5 [Source:HGNC Symbol;Acc:HGNC:10632]
IPECJ2_ENSSSCG00000017705 (pp) IPECJ2_ENSSSCG00000020790	Intra	0.986813	1	7.37952e-11	28223.5	0.986813	C-C motif chemokine ligand 5 [Source:HGNC Symbol;Acc:HGNC:10632]	Uncharacterized protein OS=Sus scrofa GN=MYEOV2 PE=1 SV=1
IPECJ2_ENSSSCG00000012965 (pp) IPECJ2_ENSSSCG00000029362	Intra	0.973626	1	4.59028e-09	24252.5	0.973626	DR1 associated protein 1 [Source:HGNC Symbol;Acc:HGNC:3019]	charged multivesicular body protein 2A [Source:HGNC Symbol;Acc:HGNC:30216]
IPECJ2_ENSSSCG00000017705 (pp) IPECJ2_ENSSSCG00000019018	Intra	0.991209	1	6.5401e-12	28659.5	0.991209	C-C motif chemokine ligand 5 [Source:HGNC Symbol;Acc:HGNC:10632]	Unknown
IPECJ2_ENSSSCG00000017705 (pp) IPECJ2_XLOC_029898	Intra	0.986813	1	7.37952e-11	28223.5	0.986813	C-C motif chemokine ligand 5 [Source:HGNC Symbol;Acc:HGNC:10632]	Proteasome subunit beta type-7 OS=Sus scrofa GN=PSMB7 PE=2 SV=2
IPECJ2_ENSSSCG00000001922 (pp) IPECJ2_ENSSSCG00000021825	Intra	0.969231	-1	1.14652e-08	21732.5	-0.969231	ariadne RBR E3 ubiquitin protein ligase 1 [Source:HGNC Symbol;Acc:HGNC:689]	40S ribosomal protein S21 [Source:UniProtKB/Swiss-Prot;Acc:P63221]
IPECJ2_ENSSSCG00000017705 (pp) IPECJ2_ENSSSCG00000010631	Intra	0.982418	-1	4.10718e-10	27446.5	-0.982418	C-C motif chemokine ligand 5 [Source:HGNC Symbol;Acc:HGNC:10632]	glycerol-3-phosphate acyltransferase, mitochondrial [Source:HGNC Symbol;Acc:HGNC:24865]
IPECJ2_ENSSSCG00000017705 (pp) IPECJ2_ENSSSCG00000021825	Intra	0.986813	1	7.37952e-11	28223.5	0.986813	C-C motif chemokine ligand 5 [Source:HGNC Symbol;Acc:HGNC:10632]	40S ribosomal protein S21 [Source:UniProtKB/Swiss-Prot;Acc:P63221]
IPECJ2_ENSSSCG00000012965 (pp) IPECJ2_ENSSSCG00000027353	Intra	0.964835	1	2.53041e-08	18397.5	0.964835	DR1 associated protein 1 [Source:HGNC Symbol;Acc:HGNC:3019]	Unknown
IPECJ2_ENSSSCG00000001922 (pp) IPECJ2_XLOC_010223	Intra	0.973626	1	4.59028e-09	24252.5	0.973626	ariadne RBR E3 ubiquitin protein ligase 1 [Source:HGNC Symbol;Acc:HGNC:689]	Uncharacterized protein OS=Sus scrofa GN=AGFG1 PE=1 SV=1
IPECJ2_ENSSSCG00000017705 (pp) IPECJ2_ENSSSCG00000024974	Intra	0.986813	1	7.37952e-11	28223.5	0.986813	C-C motif chemokine ligand 5 [Source:HGNC Symbol;Acc:HGNC:10632]	ribosomal protein L13 [Source:HGNC Symbol;Acc:HGNC:10303]
IPECJ2_ENSSSCG00000017705 (pp) IPECJ2_ENSSSCG00000014076	Intra	0.978022	-1	1.55196e-09	26153.5	-0.978022	C-C motif chemokine ligand 5 [Source:HGNC Symbol;Acc:HGNC:10632]	Isoform 2 of Soluble lamin-associated protein of 75 kDa OS=Homo sapiens GN=FAM169A
IPECJ2_ENSSSCG00000017705 (pp) IPECJ2_ENSSSCG00000027353	Intra	0.978022	1	1.55196e-09	26153.5	0.978022	C-C motif chemokine ligand 5 [Source:HGNC Symbol;Acc:HGNC:10632]	Unknown
IPECJ2_ENSSSCG00000012965 (pp) IPECJ2_XLOC_011183	Intra	0.96044	1	7.40017e-06	14245.5	0.96044	DR1 associated protein 1 [Source:HGNC Symbol;Acc:HGNC:3019]	Inosine triphosphate pyrophosphatase OS=Bos taurus GN=ITPA PE=2 SV=1
IPECJ2_ENSSSCG00000017705 (pp) IPECJ2_ENSSSCG00000001922	Intra	0.969231	-1	1.14652e-08	21732.5	-0.969231	C-C motif chemokine ligand 5 [Source:HGNC Symbol;Acc:HGNC:10632]	ariadne RBR E3 ubiquitin protein ligase 1 [Source:HGNC Symbol;Acc:HGNC:689]
IPECJ2_XLOC_009159 (pp) IPECJ2_ENSSSCG00000003080	Intra	0.964835	1	5.02606e-06	18397.5	0.964835	Unknown	immunoglobulin superfamily member 23 [Source:HGNC Symbol;Acc:HGNC:40040]
IPECJ2_ENSSSCG00000001922 (pp) IPECJ2_ENSSSCG00000010631	Intra	0.964835	1	2.53041e-08	18397.5	0.964835	ariadne RBR E3 ubiquitin protein ligase 1 [Source:HGNC Symbol;Acc:HGNC:689]	glycerol-3-phosphate acyltransferase, mitochondrial [Source:HGNC Symbol;Acc:HGNC:24865]
IPECJ2_ENSSSCG00000017705 (pp) IPECJ2_ENSSSCG00000027971	Intra	0.978022	1	1.55196e-09	26153.5	0.978022	C-C motif chemokine ligand 5 [Source:HGNC Symbol;Acc:HGNC:10632]	regulatory factor X associated ankyrin containing protein [Source:HGNC Symbol;Acc:HGNC:9987]
IPECJ2_ENSSSCG00000001922 (pp) IPECJ2_ENSSSCG00000019018	Intra	0.964835	-1	2.53041e-08	18397.5	-0.964835	ariadne RBR E3 ubiquitin protein ligase 1 [Source:HGNC Symbol;Acc:HGNC:689]	Unknown
IPECJ2_XLOC_009159 (pp) IPECJ2_ENSSSCG00000024666	Intra	0.96044	1	7.40017e-06	14245.5	0.96044	Unknown	FXYD domain containing ion transport regulator 3 [Source:HGNC Symbol;Acc:HGNC:4027]
IPECJ2_ENSSSCG00000001922 (pp) IPECJ2_ENSSSCG00000027353	Intra	0.96044	-1	5.08105e-08	14245.5	-0.96044	ariadne RBR E3 ubiquitin protein ligase 1 [Source:HGNC Symbol;Acc:HGNC:689]	Unknown
IPECJ2_XLOC_009159 (pp) IPECJ2_ENSSSCG00000003772	Intra	0.964835	-1	5.02606e-06	18397.5	-0.964835	Unknown	zinc finger ZZ-type containing 3 [Source:HGNC Symbol;Acc:HGNC:24523]
IPECJ2_ENSSSCG00000017705 (pp) IPECJ2_ENSSSCG00000017308	Intra	0.969231	-1	1.14652e-08	21732.5	-0.969231	C-C motif chemokine ligand 5 [Source:HGNC Symbol;Acc:HGNC:10632]	cell division cycle 27 [Source:HGNC Symbol;Acc:HGNC:1728]
IPECJ2_XLOC_009159 (pp) IPECJ2_ENSSSCG00000023139	Intra	0.956044	1	1.04633e-05	9305.5	0.956044	Unknown	Isoform 2 of Methyltransferase-like protein 23 OS=Homo sapiens GN=METTL23
IPECJ2_XLOC_009159 (pp) IPECJ2_ENSSSCG00000025928	Intra	0.956044	1	9.46978e-08	9305.5	0.956044	Unknown	ribosomal protein L18 [Source:HGNC Symbol;Acc:HGNC:10310]
IPECJ2_ENSSSCG00000001922 (pp) IPECJ2_XLOC_011183	Intra	0.956044	-1	9.46978e-08	9305.5	-0.956044	ariadne RBR E3 ubiquitin protein ligase 1 [Source:HGNC Symbol;Acc:HGNC:689]	Inosine triphosphate pyrophosphatase OS=Bos taurus GN=ITPA PE=2 SV=1
IPECJ2_ENSSSCG00000001922 (pp) IPECJ2_XLOC_029898	Intra	0.96044	-1	5.08105e-08	14245.5	-0.96044	ariadne RBR E3 ubiquitin protein ligase 1 [Source:HGNC Symbol;Acc:HGNC:689]	Proteasome subunit beta type-7 OS=Sus scrofa GN=PSMB7 PE=2 SV=2
IPECJ2_ENSSSCG00000017705 (pp) IPECJ2_XLOC_011183	Intra	0.969231	1	1.14652e-08	21732.5	0.969231	C-C motif chemokine ligand 5 [Source:HGNC Symbol;Acc:HGNC:10632]	Inosine triphosphate pyrophosphatase OS=Bos taurus GN=ITPA PE=2 SV=1
IPECJ2_XLOC_009159 (pp) IPECJ2_ENSSSCG00000016835	Intra	0.951648	-1	1.41528e-05	3309.5	-0.951648	Unknown	S-phase kinase-associated protein 2, E3 ubiquitin protein ligase [Source:HGNC Symbol;Acc:HGNC:10901]
IPECJ2_ENSSSCG00000001922 (pp) IPECJ2_ENSSSCG00000020790	Intra	0.951648	-1	1.66161e-07	3309.5	-0.951648	ariadne RBR E3 ubiquitin protein ligase 1 [Source:HGNC Symbol;Acc:HGNC:689]	Uncharacterized protein OS=Sus scrofa GN=MYEOV2 PE=1 SV=1
IPECJ2_ENSSSCG00000017705 (pp) IPECJ2_ENSSSCG00000029362	Intra	0.96044	1	5.08105e-08	14245.5	0.96044	C-C motif chemokine ligand 5 [Source:HGNC Symbol;Acc:HGNC:10632]	charged multivesicular body protein 2A [Source:HGNC Symbol;Acc:HGNC:30216]
IPECJ2_XLOC_009159 (pp) IPECJ2_ENSSSCG00000029034	Intra	0.956044	1	9.46978e-08	9305.5	0.956044	Unknown	cytochrome c oxidase subunit 4I1 [Source:HGNC Symbol;Acc:HGNC:2265]
IPECJ2_ENSSSCG00000001922 (pp) IPECJ2_ENSSSCG00000024974	Intra	0.951648	-1	1.66161e-07	3309.5	-0.951648	ariadne RBR E3 ubiquitin protein ligase 1 [Source:HGNC Symbol;Acc:HGNC:689]	ribosomal protein L13 [Source:HGNC Symbol;Acc:HGNC:10303]
IPECJ2_ENSSSCG00000013002 (pp) IPECJ2_ENSSSCG00000020790	Intra	0.973626	1	1.97568e-06	24252.5	0.973626	FAU, ubiquitin like and ribosomal protein S30 fusion [Source:HGNC Symbol;Acc:HGNC:3597]	Uncharacterized protein OS=Sus scrofa GN=MYEOV2 PE=1 SV=1
IPECJ2_ENSSSCG00000017705 (pp) IPECJ2_ENSSSCG00000016098	Intra	0.951648	-1	1.66161e-07	3309.5	-0.951648	C-C motif chemokine ligand 5 [Source:HGNC Symbol;Acc:HGNC:10632]	Unknown
IPECJ2_ENSSSCG00000013002 (pp) IPECJ2_XLOC_010959	Intra	0.973626	-1	4.59028e-09	24252.5	-0.973626	FAU, ubiquitin like and ribosomal protein S30 fusion [Source:HGNC Symbol;Acc:HGNC:3597]	Unknown
IPECJ2_ENSSSCG00000013002 (pp) IPECJ2_ENSSSCG00000024974	Intra	0.982418	1	5.27924e-07	27446.5	0.982418	FAU, ubiquitin like and ribosomal protein S30 fusion [Source:HGNC Symbol;Acc:HGNC:3597]	ribosomal protein L13 [Source:HGNC Symbol;Acc:HGNC:10303]
IPECJ2_ENSSSCG00000013002 (pp) IPECJ2_ENSSSCG00000019018	Intra	0.973626	1	1.97568e-06	24252.5	0.973626	FAU, ubiquitin like and ribosomal protein S30 fusion [Source:HGNC Symbol;Acc:HGNC:3597]	Unknown
IPECJ2_ENSSSCG00000013002 (pp) IPECJ2_ENSSSCG00000010631	Intra	0.969231	-1	1.14652e-08	21732.5	-0.969231	FAU, ubiquitin like and ribosomal protein S30 fusion [Source:HGNC Symbol;Acc:HGNC:3597]	glycerol-3-phosphate acyltransferase, mitochondrial [Source:HGNC Symbol;Acc:HGNC:24865]
IPECJ2_ENSSSCG00000013002 (pp) IPECJ2_ENSSSCG00000027353	Intra	0.964835	1	2.53041e-08	18397.5	0.964835	FAU, ubiquitin like and ribosomal protein S30 fusion [Source:HGNC Symbol;Acc:HGNC:3597]	Unknown
IPECJ2_ENSSSCG00000013002 (pp) IPECJ2_ENSSSCG00000027971	Intra	0.964835	1	2.53041e-08	18397.5	0.964835	FAU, ubiquitin like and ribosomal protein S30 fusion [Source:HGNC Symbol;Acc:HGNC:3597]	regulatory factor X associated ankyrin containing protein [Source:HGNC Symbol;Acc:HGNC:9987]
IPECJ2_ENSSSCG00000013002 (pp) IPECJ2_ENSSSCG00000004970	Intra	0.964835	1	5.02606e-06	18397.5	0.964835	FAU, ubiquitin like and ribosomal protein S30 fusion [Source:HGNC Symbol;Acc:HGNC:3597]	Unknown
IPECJ2_ENSSSCG00000013002 (pp) IPECJ2_ENSSSCG00000017705	Intra	0.964835	1	5.02606e-06	18397.5	0.964835	FAU, ubiquitin like and ribosomal protein S30 fusion [Source:HGNC Symbol;Acc:HGNC:3597]	C-C motif chemokine ligand 5 [Source:HGNC Symbol;Acc:HGNC:10632]
IPECJ2_ENSSSCG00000013002 (pp) IPECJ2_ENSSSCG00000012842	Intra	0.96044	1	7.40017e-06	14245.5	0.96044	FAU, ubiquitin like and ribosomal protein S30 fusion [Source:HGNC Symbol;Acc:HGNC:3597]	Unknown
IPECJ2_ENSSSCG00000013002 (pp) IPECJ2_ENSSSCG00000010063	Intra	0.96044	1	5.08105e-08	14245.5	0.96044	FAU, ubiquitin like and ribosomal protein S30 fusion [Source:HGNC Symbol;Acc:HGNC:3597]	Macrophage migration inhibitory factor OS=Sus scrofa GN=MIF PE=1 SV=3
IPECJ2_ENSSSCG00000013002 (pp) IPECJ2_ENSSSCG00000021825	Intra	0.96044	1	7.40017e-06	14245.5	0.96044	FAU, ubiquitin like and ribosomal protein S30 fusion [Source:HGNC Symbol;Acc:HGNC:3597]	40S ribosomal protein S21 [Source:UniProtKB/Swiss-Prot;Acc:P63221]
IPECJ2_ENSSSCG00000013002 (pp) IPECJ2_ENSSSCG00000029161	Intra	0.96044	1	5.08105e-08	14245.5	0.96044	FAU, ubiquitin like and ribosomal protein S30 fusion [Source:HGNC Symbol;Acc:HGNC:3597]	acireductone dioxygenase 1 [Source:HGNC Symbol;Acc:HGNC:30576]
IPECJ2_ENSSSCG00000013002 (pp) IPECJ2_ENSSSCG00000029362	Intra	0.956044	1	9.46978e-08	9305.5	0.956044	FAU, ubiquitin like and ribosomal protein S30 fusion [Source:HGNC Symbol;Acc:HGNC:3597]	charged multivesicular body protein 2A [Source:HGNC Symbol;Acc:HGNC:30216]
IPECJ2_ENSSSCG00000013002 (pp) IPECJ2_ENSSSCG00000007472	Intra	0.956044	1	1.04633e-05	9305.5	0.956044	FAU, ubiquitin like and ribosomal protein S30 fusion [Source:HGNC Symbol;Acc:HGNC:3597]	breast carcinoma amplified sequence 4 [Source:HGNC Symbol;Acc:HGNC:14367]
IPECJ2_ENSSSCG00000013002 (pp) IPECJ2_XLOC_029898	Intra	0.956044	1	1.04633e-05	9305.5	0.956044	FAU, ubiquitin like and ribosomal protein S30 fusion [Source:HGNC Symbol;Acc:HGNC:3597]	Proteasome subunit beta type-7 OS=Sus scrofa GN=PSMB7 PE=2 SV=2
IPECJ2_ENSSSCG00000005097 (pp) AscL3_XLOC_012561	Inter	0.96044	-1	7.40017e-06	14245.5	-0.96044	small nuclear RNA activating complex polypeptide 1 [Source:HGNC Symbol;Acc:HGNC:11134]	Unknown
IPECJ2_ENSSSCG00000013002 (pp) IPECJ2_ENSSSCG00000026812	Intra	0.951648	1	1.66161e-07	3309.5	0.951648	FAU, ubiquitin like and ribosomal protein S30 fusion [Source:HGNC Symbol;Acc:HGNC:3597]	Unknown
IPECJ2_ENSSSCG00000005097 (pp) IPECJ2_ENSSSCG00000006090	Intra	0.951648	1	1.66161e-07	3309.5	0.951648	small nuclear RNA activating complex polypeptide 1 [Source:HGNC Symbol;Acc:HGNC:11134]	mitochondrial transcription termination factor 3 [Source:HGNC Symbol;Acc:HGNC:24258]
IPECJ2_ENSSSCG00000013002 (pp) IPECJ2_ENSSSCG00000012965	Intra	0.951648	1	1.41528e-05	3309.5	0.951648	FAU, ubiquitin like and ribosomal protein S30 fusion [Source:HGNC Symbol;Acc:HGNC:3597]	DR1 associated protein 1 [Source:HGNC Symbol;Acc:HGNC:3019]
IPECJ2_XLOC_010223 (pp) IPECJ2_ENSSSCG00000014076	Intra	0.973626	1	1.97568e-06	24252.5	0.973626	Uncharacterized protein OS=Sus scrofa GN=AGFG1 PE=1 SV=1	Isoform 2 of Soluble lamin-associated protein of 75 kDa OS=Homo sapiens GN=FAM169A
IPECJ2_ENSSSCG00000013267 (pp) IPECJ2_ENSSSCG00000025928	Intra	0.995604	1	1.03029e-13	28836.5	0.995604	peroxisomal biogenesis factor 16 [Source:HGNC Symbol;Acc:HGNC:8857]	ribosomal protein L18 [Source:HGNC Symbol;Acc:HGNC:10310]
IPECJ2_ENSSSCG00000013267 (pp) IPECJ2_ENSSSCG00000029161	Intra	0.986813	1	7.37952e-11	28223.5	0.986813	peroxisomal biogenesis factor 16 [Source:HGNC Symbol;Acc:HGNC:8857]	acireductone dioxygenase 1 [Source:HGNC Symbol;Acc:HGNC:30576]
IPECJ2_ENSSSCG00000013267 (pp) IPECJ2_ENSSSCG00000029362	Intra	0.986813	1	7.37952e-11	28223.5	0.986813	peroxisomal biogenesis factor 16 [Source:HGNC Symbol;Acc:HGNC:8857]	charged multivesicular body protein 2A [Source:HGNC Symbol;Acc:HGNC:30216]
IPECJ2_XLOC_010223 (pp) IPECJ2_ENSSSCG00000017308	Intra	0.964835	1	2.53041e-08	18397.5	0.964835	Uncharacterized protein OS=Sus scrofa GN=AGFG1 PE=1 SV=1	cell division cycle 27 [Source:HGNC Symbol;Acc:HGNC:1728]
IPECJ2_ENSSSCG00000013267 (pp) IPECJ2_ENSSSCG00000029034	Intra	0.995604	1	1.03029e-13	28836.5	0.995604	peroxisomal biogenesis factor 16 [Source:HGNC Symbol;Acc:HGNC:8857]	cytochrome c oxidase subunit 4I1 [Source:HGNC Symbol;Acc:HGNC:2265]
IPECJ2_ENSSSCG00000013267 (pp) IPECJ2_ENSSSCG00000027840	Intra	0.991209	1	6.5401e-12	28659.5	0.991209	peroxisomal biogenesis factor 16 [Source:HGNC Symbol;Acc:HGNC:8857]	Unknown
IPECJ2_ENSSSCG00000013267 (pp) IPECJ2_ENSSSCG00000027971	Intra	0.969231	1	1.14652e-08	21732.5	0.969231	peroxisomal biogenesis factor 16 [Source:HGNC Symbol;Acc:HGNC:8857]	regulatory factor X associated ankyrin containing protein [Source:HGNC Symbol;Acc:HGNC:9987]
IPECJ2_XLOC_010577 (pp) AscL3_gene_GS_18003	Inter	0.964835	-1	5.02606e-06	18397.5	-0.964835	Splicing regulatory glutamine/lysine-rich protein 1 OS=Homo sapiens GN=SREK1 PE=1 SV=1	Succinyl-CoA:3-ketoacid-coenzyme A transferase OS=Ascaris suum GN=ASU_13672 PE=3 SV=1
IPECJ2_ENSSSCG00000013267 (pp) IPECJ2_ENSSSCG00000024974	Intra	0.964835	1	2.53041e-08	18397.5	0.964835	peroxisomal biogenesis factor 16 [Source:HGNC Symbol;Acc:HGNC:8857]	ribosomal protein L13 [Source:HGNC Symbol;Acc:HGNC:10303]
IPECJ2_ENSSSCG00000013267 (pp) IPECJ2_ENSSSCG00000020817	Intra	0.978022	1	1.07614e-06	26153.5	0.978022	peroxisomal biogenesis factor 16 [Source:HGNC Symbol;Acc:HGNC:8857]	40S ribosomal protein S16 [Source:UniProtKB/Swiss-Prot;Acc:Q29201]
IPECJ2_ENSSSCG00000013267 (pp) IPECJ2_ENSSSCG00000019018	Intra	0.956044	1	1.04633e-05	9305.5	0.956044	peroxisomal biogenesis factor 16 [Source:HGNC Symbol;Acc:HGNC:8857]	Unknown
IPECJ2_ENSSSCG00000013267 (pp) IPECJ2_ENSSSCG00000020790	Intra	0.956044	1	1.04633e-05	9305.5	0.956044	peroxisomal biogenesis factor 16 [Source:HGNC Symbol;Acc:HGNC:8857]	Uncharacterized protein OS=Sus scrofa GN=MYEOV2 PE=1 SV=1
IPECJ2_ENSSSCG00000013267 (pp) IPECJ2_ENSSSCG00000026812	Intra	0.964835	1	2.53041e-08	18397.5	0.964835	peroxisomal biogenesis factor 16 [Source:HGNC Symbol;Acc:HGNC:8857]	Unknown
IPECJ2_ENSSSCG00000005173 (pp) IPECJ2_XLOC_000015	Intra	0.973626	-1	4.59028e-09	24252.5	-0.973626	HAUS augmin like complex subunit 6 [Source:HGNC Symbol;Acc:HGNC:25948]	Mitochondrial pyruvate carrier 1 OS=Bos taurus GN=MPC1 PE=1 SV=1
IPECJ2_ENSSSCG00000013267 (pp) IPECJ2_XLOC_029898	Intra	0.96044	1	5.08105e-08	14245.5	0.96044	peroxisomal biogenesis factor 16 [Source:HGNC Symbol;Acc:HGNC:8857]	Proteasome subunit beta type-7 OS=Sus scrofa GN=PSMB7 PE=2 SV=2
IPECJ2_ENSSSCG00000005173 (pp) IPECJ2_ENSSSCG00000010063	Intra	0.964835	-1	2.53041e-08	18397.5	-0.964835	HAUS augmin like complex subunit 6 [Source:HGNC Symbol;Acc:HGNC:25948]	Macrophage migration inhibitory factor OS=Sus scrofa GN=MIF PE=1 SV=3
IPECJ2_ENSSSCG00000005173 (pp) IPECJ2_ENSSSCG00000031053	Intra	0.969231	-1	1.14652e-08	21732.5	-0.969231	HAUS augmin like complex subunit 6 [Source:HGNC Symbol;Acc:HGNC:25948]	Unknown
IPECJ2_ENSSSCG00000019018 (pp) IPECJ2_ENSSSCG00000027353	Intra	0.991209	1	6.5401e-12	28659.5	0.991209	Unknown	Unknown
IPECJ2_ENSSSCG00000019018 (pp) IPECJ2_ENSSSCG00000021825	Intra	0.986813	1	1.88722e-07	28223.5	0.986813	Unknown	40S ribosomal protein S21 [Source:UniProtKB/Swiss-Prot;Acc:P63221]
IPECJ2_XLOC_010959 (pp) IPECJ2_ENSSSCG00000010631	Intra	0.973626	1	4.59028e-09	24252.5	0.973626	Unknown	glycerol-3-phosphate acyltransferase, mitochondrial [Source:HGNC Symbol;Acc:HGNC:24865]
IPECJ2_ENSSSCG00000019018 (pp) IPECJ2_XLOC_029898	Intra	0.995604	1	1.03029e-13	28836.5	0.995604	Unknown	Proteasome subunit beta type-7 OS=Sus scrofa GN=PSMB7 PE=2 SV=2
IPECJ2_XLOC_010959 (pp) IPECJ2_ENSSSCG00000004970	Intra	0.964835	-1	5.02606e-06	18397.5	-0.964835	Unknown	Unknown
IPECJ2_XLOC_010959 (pp) IPECJ2_XLOC_010223	Intra	0.964835	1	2.53041e-08	18397.5	0.964835	Unknown	Uncharacterized protein OS=Sus scrofa GN=AGFG1 PE=1 SV=1
IPECJ2_XLOC_010959 (pp) IPECJ2_ENSSSCG00000020790	Intra	0.96044	-1	7.40017e-06	14245.5	-0.96044	Unknown	Uncharacterized protein OS=Sus scrofa GN=MYEOV2 PE=1 SV=1
IPECJ2_XLOC_010959 (pp) IPECJ2_ENSSSCG00000021825	Intra	0.96044	-1	7.40017e-06	14245.5	-0.96044	Unknown	40S ribosomal protein S21 [Source:UniProtKB/Swiss-Prot;Acc:P63221]
IPECJ2_XLOC_010959 (pp) IPECJ2_ENSSSCG00000024974	Intra	0.96044	-1	7.40017e-06	14245.5	-0.96044	Unknown	ribosomal protein L13 [Source:HGNC Symbol;Acc:HGNC:10303]
IPECJ2_ENSSSCG00000026731 (pp) IPECJ2_ENSSSCG00000014204	Intra	0.982418	1	4.10718e-10	27446.5	0.982418	centrosomal protein 85 [Source:HGNC Symbol;Acc:HGNC:25309]	decapping mRNA 2 [Source:HGNC Symbol;Acc:HGNC:24452]
IPECJ2_XLOC_010959 (pp) IPECJ2_ENSSSCG00000026812	Intra	0.96044	-1	7.40017e-06	14245.5	-0.96044	Unknown	Unknown
IPECJ2_XLOC_010959 (pp) IPECJ2_ENSSSCG00000010063	Intra	0.956044	-1	9.46978e-08	9305.5	-0.956044	Unknown	Macrophage migration inhibitory factor OS=Sus scrofa GN=MIF PE=1 SV=3
IPECJ2_ENSSSCG00000020675 (pp) IPECJ2_ENSSSCG00000026731	Intra	0.978022	1	1.07614e-06	26153.5	0.978022	activating transcription factor 7 interacting protein 2 [Source:HGNC Symbol;Acc:HGNC:20397]	centrosomal protein 85 [Source:HGNC Symbol;Acc:HGNC:25309]
IPECJ2_XLOC_010959 (pp) IPECJ2_ENSSSCG00000019018	Intra	0.956044	-1	1.04633e-05	9305.5	-0.956044	Unknown	Unknown
IPECJ2_ENSSSCG00000013402 (pp) IPECJ2_ENSSSCG00000022647	Intra	0.956044	-1	9.46978e-08	9305.5	-0.956044	Unknown	translocase of inner mitochondrial membrane 17 homolog B (yeast) [Source:HGNC Symbol;Acc:HGNC:17310]
IPECJ2_ENSSSCG00000020675 (pp) IPECJ2_ENSSSCG00000014204	Intra	0.969231	1	3.28443e-06	21732.5	0.969231	activating transcription factor 7 interacting protein 2 [Source:HGNC Symbol;Acc:HGNC:20397]	decapping mRNA 2 [Source:HGNC Symbol;Acc:HGNC:24452]
IPECJ2_ENSSSCG00000020701 (pp) IPECJ2_ENSSSCG00000009077	Intra	0.956044	-1	1.04633e-05	9305.5	-0.956044	tetratricopeptide repeat domain 9 [Source:HGNC Symbol;Acc:HGNC:20267]	heat shock protein family A (Hsp70) member 4 like [Source:HGNC Symbol;Acc:HGNC:17041]
IPECJ2_ENSSSCG00000013402 (pp) IPECJ2_ENSSSCG00000027840	Intra	0.951648	-1	1.66161e-07	3309.5	-0.951648	Unknown	Unknown
IPECJ2_XLOC_010959 (pp) IPECJ2_XLOC_011183	Intra	0.956044	-1	1.04633e-05	9305.5	-0.956044	Unknown	Inosine triphosphate pyrophosphatase OS=Bos taurus GN=ITPA PE=2 SV=1
IPECJ2_ENSSSCG00000026812 (pp) IPECJ2_ENSSSCG00000027971	Intra	0.982418	1	4.10718e-10	27446.5	0.982418	Unknown	regulatory factor X associated ankyrin containing protein [Source:HGNC Symbol;Acc:HGNC:9987]
IPECJ2_XLOC_010959 (pp) IPECJ2_ENSSSCG00000027353	Intra	0.951648	-1	1.41528e-05	3309.5	-0.951648	Unknown	Unknown
IPECJ2_ENSSSCG00000026812 (pp) IPECJ2_XLOC_029898	Intra	0.973626	1	1.97568e-06	24252.5	0.973626	Unknown	Proteasome subunit beta type-7 OS=Sus scrofa GN=PSMB7 PE=2 SV=2
IPECJ2_XLOC_010959 (pp) IPECJ2_ENSSSCG00000027971	Intra	0.951648	-1	1.66161e-07	3309.5	-0.951648	Unknown	regulatory factor X associated ankyrin containing protein [Source:HGNC Symbol;Acc:HGNC:9987]
IPECJ2_ENSSSCG00000026812 (pp) IPECJ2_ENSSSCG00000024974	Intra	0.973626	1	1.97568e-06	24252.5	0.973626	Unknown	ribosomal protein L13 [Source:HGNC Symbol;Acc:HGNC:10303]
IPECJ2_ENSSSCG00000026812 (pp) IPECJ2_ENSSSCG00000027353	Intra	0.969231	1	3.28443e-06	21732.5	0.969231	Unknown	Unknown
IPECJ2_ENSSSCG00000020790 (pp) IPECJ2_ENSSSCG00000027971	Intra	0.995604	1	1.03029e-13	28836.5	0.995604	Uncharacterized protein OS=Sus scrofa GN=MYEOV2 PE=1 SV=1	regulatory factor X associated ankyrin containing protein [Source:HGNC Symbol;Acc:HGNC:9987]
IPECJ2_XLOC_011183 (pp) IPECJ2_ENSSSCG00000021825	Intra	0.991209	1	4.46942e-08	28659.5	0.991209	Inosine triphosphate pyrophosphatase OS=Bos taurus GN=ITPA PE=2 SV=1	40S ribosomal protein S21 [Source:UniProtKB/Swiss-Prot;Acc:P63221]
IPECJ2_ENSSSCG00000026812 (pp) IPECJ2_ENSSSCG00000010631	Intra	0.969231	-1	1.14652e-08	21732.5	-0.969231	Unknown	glycerol-3-phosphate acyltransferase, mitochondrial [Source:HGNC Symbol;Acc:HGNC:24865]
IPECJ2_ENSSSCG00000026812 (pp) IPECJ2_ENSSSCG00000019018	Intra	0.969231	1	3.28443e-06	21732.5	0.969231	Unknown	Unknown
IPECJ2_XLOC_011183 (pp) IPECJ2_ENSSSCG00000019018	Intra	0.969231	1	3.28443e-06	21732.5	0.969231	Inosine triphosphate pyrophosphatase OS=Bos taurus GN=ITPA PE=2 SV=1	Unknown
IPECJ2_ENSSSCG00000020790 (pp) IPECJ2_ENSSSCG00000019018	Intra	0.986813	1	7.37952e-11	28223.5	0.986813	Uncharacterized protein OS=Sus scrofa GN=MYEOV2 PE=1 SV=1	Unknown
IPECJ2_XLOC_011183 (pp) IPECJ2_XLOC_029898	Intra	0.964835	1	2.53041e-08	18397.5	0.964835	Inosine triphosphate pyrophosphatase OS=Bos taurus GN=ITPA PE=2 SV=1	Proteasome subunit beta type-7 OS=Sus scrofa GN=PSMB7 PE=2 SV=2
IPECJ2_ENSSSCG00000020790 (pp) IPECJ2_ENSSSCG00000020817	Intra	0.982418	1	5.27924e-07	27446.5	0.982418	Uncharacterized protein OS=Sus scrofa GN=MYEOV2 PE=1 SV=1	40S ribosomal protein S16 [Source:UniProtKB/Swiss-Prot;Acc:Q29201]
IPECJ2_ENSSSCG00000026812 (pp) IPECJ2_ENSSSCG00000021825	Intra	0.964835	1	5.02606e-06	18397.5	0.964835	Unknown	40S ribosomal protein S21 [Source:UniProtKB/Swiss-Prot;Acc:P63221]
IPECJ2_ENSSSCG00000020790 (pp) IPECJ2_ENSSSCG00000021825	Intra	0.991209	1	4.46942e-08	28659.5	0.991209	Uncharacterized protein OS=Sus scrofa GN=MYEOV2 PE=1 SV=1	40S ribosomal protein S21 [Source:UniProtKB/Swiss-Prot;Acc:P63221]
IPECJ2_ENSSSCG00000020790 (pp) IPECJ2_ENSSSCG00000024974	Intra	0.991209	1	6.5401e-12	28659.5	0.991209	Uncharacterized protein OS=Sus scrofa GN=MYEOV2 PE=1 SV=1	ribosomal protein L13 [Source:HGNC Symbol;Acc:HGNC:10303]
IPECJ2_ENSSSCG00000020790 (pp) IPECJ2_XLOC_011183	Intra	0.978022	1	1.55196e-09	26153.5	0.978022	Uncharacterized protein OS=Sus scrofa GN=MYEOV2 PE=1 SV=1	Inosine triphosphate pyrophosphatase OS=Bos taurus GN=ITPA PE=2 SV=1
IPECJ2_ENSSSCG00000020790 (pp) IPECJ2_XLOC_029898	Intra	0.978022	1	1.55196e-09	26153.5	0.978022	Uncharacterized protein OS=Sus scrofa GN=MYEOV2 PE=1 SV=1	Proteasome subunit beta type-7 OS=Sus scrofa GN=PSMB7 PE=2 SV=2
IPECJ2_ENSSSCG00000020790 (pp) IPECJ2_ENSSSCG00000027353	Intra	0.982418	1	4.10718e-10	27446.5	0.982418	Uncharacterized protein OS=Sus scrofa GN=MYEOV2 PE=1 SV=1	Unknown
IPECJ2_ENSSSCG00000020790 (pp) IPECJ2_ENSSSCG00000029362	Intra	0.978022	1	1.55196e-09	26153.5	0.978022	Uncharacterized protein OS=Sus scrofa GN=MYEOV2 PE=1 SV=1	charged multivesicular body protein 2A [Source:HGNC Symbol;Acc:HGNC:30216]
IPECJ2_ENSSSCG00000026812 (pp) IPECJ2_XLOC_011183	Intra	0.956044	1	1.04633e-05	9305.5	0.956044	Unknown	Inosine triphosphate pyrophosphatase OS=Bos taurus GN=ITPA PE=2 SV=1
IPECJ2_ENSSSCG00000026812 (pp) IPECJ2_ENSSSCG00000017705	Intra	0.956044	1	1.04633e-05	9305.5	0.956044	Unknown	C-C motif chemokine ligand 5 [Source:HGNC Symbol;Acc:HGNC:10632]
IPECJ2_ENSSSCG00000020790 (pp) IPECJ2_ENSSSCG00000026812	Intra	0.973626	1	4.59028e-09	24252.5	0.973626	Uncharacterized protein OS=Sus scrofa GN=MYEOV2 PE=1 SV=1	Unknown
IPECJ2_XLOC_011183 (pp) IPECJ2_ENSSSCG00000014076	Intra	0.956044	-1	1.04633e-05	9305.5	-0.956044	Inosine triphosphate pyrophosphatase OS=Bos taurus GN=ITPA PE=2 SV=1	Isoform 2 of Soluble lamin-associated protein of 75 kDa OS=Homo sapiens GN=FAM169A
IPECJ2_ENSSSCG00000020790 (pp) IPECJ2_ENSSSCG00000029034	Intra	0.964835	1	2.53041e-08	18397.5	0.964835	Uncharacterized protein OS=Sus scrofa GN=MYEOV2 PE=1 SV=1	cytochrome c oxidase subunit 4I1 [Source:HGNC Symbol;Acc:HGNC:2265]
IPECJ2_ENSSSCG00000020790 (pp) IPECJ2_ENSSSCG00000025928	Intra	0.964835	1	2.53041e-08	18397.5	0.964835	Uncharacterized protein OS=Sus scrofa GN=MYEOV2 PE=1 SV=1	ribosomal protein L18 [Source:HGNC Symbol;Acc:HGNC:10310]
IPECJ2_ENSSSCG00000013453 (pp) IPECJ2_ENSSSCG00000000769	Intra	0.969231	1	3.28443e-06	21732.5	0.969231	Uncharacterized protein OS=Sus scrofa GN=PLEKHJ1 PE=4 SV=1	BH3 interacting domain death agonist [Source:HGNC Symbol;Acc:HGNC:1050]
IPECJ2_ENSSSCG00000013453 (pp) IPECJ2_ENSSSCG00000023334	Intra	0.964835	-1	2.53041e-08	18397.5	-0.964835	Uncharacterized protein OS=Sus scrofa GN=PLEKHJ1 PE=4 SV=1	Uncharacterized protein OS=Sus scrofa GN=CXorf23 PE=4 SV=1
IPECJ2_ENSSSCG00000020817 (pp) IPECJ2_ENSSSCG00000027971	Intra	0.991209	1	6.5401e-12	28659.5	0.991209	40S ribosomal protein S16 [Source:UniProtKB/Swiss-Prot;Acc:Q29201]	regulatory factor X associated ankyrin containing protein [Source:HGNC Symbol;Acc:HGNC:9987]
IPECJ2_ENSSSCG00000013453 (pp) IPECJ2_ENSSSCG00000022867	Intra	0.956044	1	9.46978e-08	9305.5	0.956044	Uncharacterized protein OS=Sus scrofa GN=PLEKHJ1 PE=4 SV=1	Unknown
IPECJ2_ENSSSCG00000020817 (pp) IPECJ2_ENSSSCG00000026812	Intra	0.982418	1	4.10718e-10	27446.5	0.982418	40S ribosomal protein S16 [Source:UniProtKB/Swiss-Prot;Acc:Q29201]	Unknown
IPECJ2_ENSSSCG00000009479 (pp) IPECJ2_ENSSSCG00000025293	Intra	0.982418	1	4.10718e-10	27446.5	0.982418	RNA binding motif protein 26 [Source:HGNC Symbol;Acc:HGNC:20327]	helicase like transcription factor [Source:HGNC Symbol;Acc:HGNC:11099]
IPECJ2_ENSSSCG00000020817 (pp) IPECJ2_ENSSSCG00000029034	Intra	0.982418	1	4.10718e-10	27446.5	0.982418	40S ribosomal protein S16 [Source:UniProtKB/Swiss-Prot;Acc:Q29201]	cytochrome c oxidase subunit 4I1 [Source:HGNC Symbol;Acc:HGNC:2265]
IPECJ2_ENSSSCG00000013453 (pp) IPECJ2_ENSSSCG00000003464	Intra	0.951648	-1	1.66161e-07	3309.5	-0.951648	Uncharacterized protein OS=Sus scrofa GN=PLEKHJ1 PE=4 SV=1	DnaJ heat shock protein family (Hsp40) member C16 [Source:HGNC Symbol;Acc:HGNC:29157]
IPECJ2_ENSSSCG00000013453 (pp) AscL3_gene_L3E_01572	Inter	0.96044	-1	7.40017e-06	14245.5	-0.96044	Uncharacterized protein OS=Sus scrofa GN=PLEKHJ1 PE=4 SV=1	Bm1034 OS=Brugia malayi GN=Bm1034 PE=4 SV=1
IPECJ2_ENSSSCG00000020817 (pp) IPECJ2_ENSSSCG00000029362	Intra	0.986813	1	7.37952e-11	28223.5	0.986813	40S ribosomal protein S16 [Source:UniProtKB/Swiss-Prot;Acc:Q29201]	charged multivesicular body protein 2A [Source:HGNC Symbol;Acc:HGNC:30216]
IPECJ2_ENSSSCG00000013453 (pp) IPECJ2_ENSSSCG00000010239	Intra	0.96044	-1	7.40017e-06	14245.5	-0.96044	Uncharacterized protein OS=Sus scrofa GN=PLEKHJ1 PE=4 SV=1	RUN and FYVE domain containing 2 [Source:HGNC Symbol;Acc:HGNC:19761]
IPECJ2_ENSSSCG00000020817 (pp) IPECJ2_ENSSSCG00000025928	Intra	0.982418	1	4.10718e-10	27446.5	0.982418	40S ribosomal protein S16 [Source:UniProtKB/Swiss-Prot;Acc:Q29201]	ribosomal protein L18 [Source:HGNC Symbol;Acc:HGNC:10310]
IPECJ2_ENSSSCG00000020817 (pp) IPECJ2_ENSSSCG00000027840	Intra	0.973626	1	4.59028e-09	24252.5	0.973626	40S ribosomal protein S16 [Source:UniProtKB/Swiss-Prot;Acc:Q29201]	Unknown
IPECJ2_ENSSSCG00000020817 (pp) IPECJ2_ENSSSCG00000029161	Intra	0.973626	1	4.59028e-09	24252.5	0.973626	40S ribosomal protein S16 [Source:UniProtKB/Swiss-Prot;Acc:Q29201]	acireductone dioxygenase 1 [Source:HGNC Symbol;Acc:HGNC:30576]
IPECJ2_ENSSSCG00000020817 (pp) IPECJ2_XLOC_029898	Intra	0.969231	1	1.14652e-08	21732.5	0.969231	40S ribosomal protein S16 [Source:UniProtKB/Swiss-Prot;Acc:Q29201]	Proteasome subunit beta type-7 OS=Sus scrofa GN=PSMB7 PE=2 SV=2
IPECJ2_ENSSSCG00000020817 (pp) IPECJ2_ENSSSCG00000017705	Intra	0.964835	1	5.02606e-06	18397.5	0.964835	40S ribosomal protein S16 [Source:UniProtKB/Swiss-Prot;Acc:Q29201]	C-C motif chemokine ligand 5 [Source:HGNC Symbol;Acc:HGNC:10632]
IPECJ2_ENSSSCG00000020817 (pp) IPECJ2_ENSSSCG00000021825	Intra	0.969231	1	3.28443e-06	21732.5	0.969231	40S ribosomal protein S16 [Source:UniProtKB/Swiss-Prot;Acc:Q29201]	40S ribosomal protein S21 [Source:UniProtKB/Swiss-Prot;Acc:P63221]
IPECJ2_ENSSSCG00000020817 (pp) IPECJ2_ENSSSCG00000024974	Intra	0.969231	1	1.14652e-08	21732.5	0.969231	40S ribosomal protein S16 [Source:UniProtKB/Swiss-Prot;Acc:Q29201]	ribosomal protein L13 [Source:HGNC Symbol;Acc:HGNC:10303]
IPECJ2_ENSSSCG00000020817 (pp) IPECJ2_ENSSSCG00000027353	Intra	0.964835	1	2.53041e-08	18397.5	0.964835	40S ribosomal protein S16 [Source:UniProtKB/Swiss-Prot;Acc:Q29201]	Unknown
IPECJ2_ENSSSCG00000009479 (pp) IPECJ2_ENSSSCG00000025868	Intra	0.956044	-1	9.46978e-08	9305.5	-0.956044	RNA binding motif protein 26 [Source:HGNC Symbol;Acc:HGNC:20327]	Unknown
IPECJ2_ENSSSCG00000009479 (pp) IPECJ2_XLOC_029898	Intra	0.96044	-1	5.08105e-08	14245.5	-0.96044	RNA binding motif protein 26 [Source:HGNC Symbol;Acc:HGNC:20327]	Proteasome subunit beta type-7 OS=Sus scrofa GN=PSMB7 PE=2 SV=2
IPECJ2_ENSSSCG00000020817 (pp) IPECJ2_ENSSSCG00000019018	Intra	0.964835	1	2.53041e-08	18397.5	0.964835	40S ribosomal protein S16 [Source:UniProtKB/Swiss-Prot;Acc:Q29201]	Unknown
IPECJ2_ENSSSCG00000009479 (pp) IPECJ2_XLOC_023587	Intra	0.956044	-1	9.46978e-08	9305.5	-0.956044	RNA binding motif protein 26 [Source:HGNC Symbol;Acc:HGNC:20327]	IL-23 (Fragment) OS=Sus scrofa PE=2 SV=1
IPECJ2_ENSSSCG00000020817 (pp) IPECJ2_XLOC_011183	Intra	0.951648	1	1.66161e-07	3309.5	0.951648	40S ribosomal protein S16 [Source:UniProtKB/Swiss-Prot;Acc:Q29201]	Inosine triphosphate pyrophosphatase OS=Bos taurus GN=ITPA PE=2 SV=1
IPECJ2_ENSSSCG00000009479 (pp) IPECJ2_ENSSSCG00000025928	Intra	0.956044	-1	9.46978e-08	9305.5	-0.956044	RNA binding motif protein 26 [Source:HGNC Symbol;Acc:HGNC:20327]	ribosomal protein L18 [Source:HGNC Symbol;Acc:HGNC:10310]
IPECJ2_ENSSSCG00000009479 (pp) IPECJ2_ENSSSCG00000029034	Intra	0.956044	-1	9.46978e-08	9305.5	-0.956044	RNA binding motif protein 26 [Source:HGNC Symbol;Acc:HGNC:20327]	cytochrome c oxidase subunit 4I1 [Source:HGNC Symbol;Acc:HGNC:2265]
IPECJ2_ENSSSCG00000009479 (pp) IPECJ2_ENSSSCG00000013267	Intra	0.951648	-1	1.66161e-07	3309.5	-0.951648	RNA binding motif protein 26 [Source:HGNC Symbol;Acc:HGNC:20327]	peroxisomal biogenesis factor 16 [Source:HGNC Symbol;Acc:HGNC:8857]
IPECJ2_ENSSSCG00000009479 (pp) IPECJ2_ENSSSCG00000022647	Intra	0.951648	-1	1.66161e-07	3309.5	-0.951648	RNA binding motif protein 26 [Source:HGNC Symbol;Acc:HGNC:20327]	translocase of inner mitochondrial membrane 17 homolog B (yeast) [Source:HGNC Symbol;Acc:HGNC:17310]
IPECJ2_ENSSSCG00000009491 (pp) AscL3_gene_GS_19483	Inter	0.96044	1	7.40017e-06	14245.5	0.96044	TDP-glucose 4,6-dehydratase [Source:HGNC Symbol;Acc:HGNC:20324]	WD repeat-containing protein tag-125 OS=Caenorhabditis briggsae GN=tag-125 PE=4 SV=1
IPECJ2_ENSSSCG00000013619 (pp) IPECJ2_ENSSSCG00000007472	Intra	0.978022	1	1.07614e-06	26153.5	0.978022	SWIM-type zinc finger 7 associated protein 1 [Source:HGNC Symbol;Acc:HGNC:26638]	breast carcinoma amplified sequence 4 [Source:HGNC Symbol;Acc:HGNC:14367]
IPECJ2_ENSSSCG00000013619 (pp) IPECJ2_ENSSSCG00000027840	Intra	0.978022	1	1.55196e-09	26153.5	0.978022	SWIM-type zinc finger 7 associated protein 1 [Source:HGNC Symbol;Acc:HGNC:26638]	Unknown
IPECJ2_ENSSSCG00000013619 (pp) IPECJ2_ENSSSCG00000022647	Intra	0.982418	1	4.10718e-10	27446.5	0.982418	SWIM-type zinc finger 7 associated protein 1 [Source:HGNC Symbol;Acc:HGNC:26638]	translocase of inner mitochondrial membrane 17 homolog B (yeast) [Source:HGNC Symbol;Acc:HGNC:17310]
IPECJ2_ENSSSCG00000013619 (pp) IPECJ2_ENSSSCG00000013267	Intra	0.973626	1	1.97568e-06	24252.5	0.973626	SWIM-type zinc finger 7 associated protein 1 [Source:HGNC Symbol;Acc:HGNC:26638]	peroxisomal biogenesis factor 16 [Source:HGNC Symbol;Acc:HGNC:8857]
IPECJ2_ENSSSCG00000013619 (pp) IPECJ2_ENSSSCG00000017114	Intra	0.973626	1	4.59028e-09	24252.5	0.973626	SWIM-type zinc finger 7 associated protein 1 [Source:HGNC Symbol;Acc:HGNC:26638]	NADH:ubiquinone oxidoreductase subunit S6 [Source:HGNC Symbol;Acc:HGNC:7713]
IPECJ2_ENSSSCG00000013619 (pp) IPECJ2_ENSSSCG00000029161	Intra	0.978022	1	1.55196e-09	26153.5	0.978022	SWIM-type zinc finger 7 associated protein 1 [Source:HGNC Symbol;Acc:HGNC:26638]	acireductone dioxygenase 1 [Source:HGNC Symbol;Acc:HGNC:30576]
IPECJ2_ENSSSCG00000013619 (pp) IPECJ2_ENSSSCG00000001423	Intra	0.973626	1	4.59028e-09	24252.5	0.973626	SWIM-type zinc finger 7 associated protein 1 [Source:HGNC Symbol;Acc:HGNC:26638]	negative elongation factor complex member E [Source:HGNC Symbol;Acc:HGNC:13974]
IPECJ2_ENSSSCG00000013619 (pp) IPECJ2_ENSSSCG00000025928	Intra	0.96044	1	7.40017e-06	14245.5	0.96044	SWIM-type zinc finger 7 associated protein 1 [Source:HGNC Symbol;Acc:HGNC:26638]	ribosomal protein L18 [Source:HGNC Symbol;Acc:HGNC:10310]
IPECJ2_ENSSSCG00000013619 (pp) IPECJ2_ENSSSCG00000027308	Intra	0.96044	1	5.08105e-08	14245.5	0.96044	SWIM-type zinc finger 7 associated protein 1 [Source:HGNC Symbol;Acc:HGNC:26638]	Unknown
IPECJ2_ENSSSCG00000002646 (pp) IPECJ2_ENSSSCG00000000061	Intra	0.96044	1	5.08105e-08	14245.5	0.96044	trafficking protein particle complex 2 like [Source:HGNC Symbol;Acc:HGNC:30887]	phosphomannomutase 1 [Source:HGNC Symbol;Acc:HGNC:9114]
IPECJ2_ENSSSCG00000013619 (pp) IPECJ2_ENSSSCG00000026914	Intra	0.973626	1	4.59028e-09	24252.5	0.973626	SWIM-type zinc finger 7 associated protein 1 [Source:HGNC Symbol;Acc:HGNC:26638]	phospholipase A2 group XVI [Source:HGNC Symbol;Acc:HGNC:17825]
IPECJ2_ENSSSCG00000002646 (pp) IPECJ2_ENSSSCG00000007646	Intra	0.96044	1	5.08105e-08	14245.5	0.96044	trafficking protein particle complex 2 like [Source:HGNC Symbol;Acc:HGNC:30887]	late endosomal/lysosomal adaptor, MAPK and MTOR activator 4 [Source:HGNC Symbol;Acc:HGNC:33772]
IPECJ2_ENSSSCG00000013619 (pp) IPECJ2_ENSSSCG00000001884	Intra	0.96044	1	7.40017e-06	14245.5	0.96044	SWIM-type zinc finger 7 associated protein 1 [Source:HGNC Symbol;Acc:HGNC:26638]	COMM domain containing 4 [Source:HGNC Symbol;Acc:HGNC:26027]
IPECJ2_ENSSSCG00000013619 (pp) IPECJ2_ENSSSCG00000012965	Intra	0.956044	1	1.04633e-05	9305.5	0.956044	SWIM-type zinc finger 7 associated protein 1 [Source:HGNC Symbol;Acc:HGNC:26638]	DR1 associated protein 1 [Source:HGNC Symbol;Acc:HGNC:3019]
IPECJ2_ENSSSCG00000026914 (pp) IPECJ2_ENSSSCG00000026812	Intra	0.978022	1	1.07614e-06	26153.5	0.978022	phospholipase A2 group XVI [Source:HGNC Symbol;Acc:HGNC:17825]	Unknown
IPECJ2_ENSSSCG00000013619 (pp) IPECJ2_ENSSSCG00000015786	Intra	0.956044	-1	1.04633e-05	9305.5	-0.956044	SWIM-type zinc finger 7 associated protein 1 [Source:HGNC Symbol;Acc:HGNC:26638]	Unknown
IPECJ2_ENSSSCG00000013619 (pp) IPECJ2_ENSSSCG00000029034	Intra	0.96044	1	7.40017e-06	14245.5	0.96044	SWIM-type zinc finger 7 associated protein 1 [Source:HGNC Symbol;Acc:HGNC:26638]	cytochrome c oxidase subunit 4I1 [Source:HGNC Symbol;Acc:HGNC:2265]
IPECJ2_ENSSSCG00000002646 (pp) IPECJ2_ENSSSCG00000012965	Intra	0.96044	1	5.08105e-08	14245.5	0.96044	trafficking protein particle complex 2 like [Source:HGNC Symbol;Acc:HGNC:30887]	DR1 associated protein 1 [Source:HGNC Symbol;Acc:HGNC:3019]
IPECJ2_ENSSSCG00000013619 (pp) IPECJ2_XLOC_007562	Intra	0.96044	1	5.08105e-08	14245.5	0.96044	SWIM-type zinc finger 7 associated protein 1 [Source:HGNC Symbol;Acc:HGNC:26638]	Unknown
IPECJ2_ENSSSCG00000013619 (pp) IPECJ2_ENSSSCG00000026812	Intra	0.951648	1	1.41528e-05	3309.5	0.951648	SWIM-type zinc finger 7 associated protein 1 [Source:HGNC Symbol;Acc:HGNC:26638]	Unknown
IPECJ2_ENSSSCG00000026914 (pp) IPECJ2_ENSSSCG00000020817	Intra	0.969231	1	3.28443e-06	21732.5	0.969231	phospholipase A2 group XVI [Source:HGNC Symbol;Acc:HGNC:17825]	40S ribosomal protein S16 [Source:UniProtKB/Swiss-Prot;Acc:Q29201]
IPECJ2_ENSSSCG00000026914 (pp) IPECJ2_ENSSSCG00000027840	Intra	0.969231	1	1.14652e-08	21732.5	0.969231	phospholipase A2 group XVI [Source:HGNC Symbol;Acc:HGNC:17825]	Unknown
IPECJ2_ENSSSCG00000013619 (pp) IPECJ2_ENSSSCG00000027827	Intra	0.951648	1	1.66161e-07	3309.5	0.951648	SWIM-type zinc finger 7 associated protein 1 [Source:HGNC Symbol;Acc:HGNC:26638]	UDP-galactose-4-epimerase [Source:HGNC Symbol;Acc:HGNC:4116]
IPECJ2_ENSSSCG00000026914 (pp) IPECJ2_ENSSSCG00000029362	Intra	0.973626	1	1.97568e-06	24252.5	0.973626	phospholipase A2 group XVI [Source:HGNC Symbol;Acc:HGNC:17825]	charged multivesicular body protein 2A [Source:HGNC Symbol;Acc:HGNC:30216]
IPECJ2_ENSSSCG00000013619 (pp) IPECJ2_ENSSSCG00000029362	Intra	0.956044	1	9.46978e-08	9305.5	0.956044	SWIM-type zinc finger 7 associated protein 1 [Source:HGNC Symbol;Acc:HGNC:26638]	charged multivesicular body protein 2A [Source:HGNC Symbol;Acc:HGNC:30216]
IPECJ2_ENSSSCG00000013619 (pp) IPECJ2_ENSSSCG00000025868	Intra	0.951648	1	1.66161e-07	3309.5	0.951648	SWIM-type zinc finger 7 associated protein 1 [Source:HGNC Symbol;Acc:HGNC:26638]	Unknown
IPECJ2_ENSSSCG00000026914 (pp) IPECJ2_ENSSSCG00000007472	Intra	0.969231	1	3.28443e-06	21732.5	0.969231	phospholipase A2 group XVI [Source:HGNC Symbol;Acc:HGNC:17825]	breast carcinoma amplified sequence 4 [Source:HGNC Symbol;Acc:HGNC:14367]
IPECJ2_ENSSSCG00000026914 (pp) IPECJ2_ENSSSCG00000000061	Intra	0.964835	1	5.02606e-06	18397.5	0.964835	phospholipase A2 group XVI [Source:HGNC Symbol;Acc:HGNC:17825]	phosphomannomutase 1 [Source:HGNC Symbol;Acc:HGNC:9114]
IPECJ2_ENSSSCG00000026914 (pp) IPECJ2_ENSSSCG00000001423	Intra	0.964835	1	2.53041e-08	18397.5	0.964835	phospholipase A2 group XVI [Source:HGNC Symbol;Acc:HGNC:17825]	negative elongation factor complex member E [Source:HGNC Symbol;Acc:HGNC:13974]
IPECJ2_ENSSSCG00000026914 (pp) IPECJ2_ENSSSCG00000027971	Intra	0.969231	1	1.14652e-08	21732.5	0.969231	phospholipase A2 group XVI [Source:HGNC Symbol;Acc:HGNC:17825]	regulatory factor X associated ankyrin containing protein [Source:HGNC Symbol;Acc:HGNC:9987]
IPECJ2_ENSSSCG00000013619 (pp) IPECJ2_ENSSSCG00000027971	Intra	0.951648	1	1.66161e-07	3309.5	0.951648	SWIM-type zinc finger 7 associated protein 1 [Source:HGNC Symbol;Acc:HGNC:26638]	regulatory factor X associated ankyrin containing protein [Source:HGNC Symbol;Acc:HGNC:9987]
IPECJ2_ENSSSCG00000026914 (pp) IPECJ2_XLOC_007562	Intra	0.969231	1	3.28443e-06	21732.5	0.969231	phospholipase A2 group XVI [Source:HGNC Symbol;Acc:HGNC:17825]	Unknown
IPECJ2_ENSSSCG00000002646 (pp) IPECJ2_ENSSSCG00000012784	Intra	0.956044	1	9.46978e-08	9305.5	0.956044	trafficking protein particle complex 2 like [Source:HGNC Symbol;Acc:HGNC:30887]	signal sequence receptor subunit 4 [Source:HGNC Symbol;Acc:HGNC:11326]
IPECJ2_ENSSSCG00000026914 (pp) IPECJ2_ENSSSCG00000013267	Intra	0.964835	1	5.02606e-06	18397.5	0.964835	phospholipase A2 group XVI [Source:HGNC Symbol;Acc:HGNC:17825]	peroxisomal biogenesis factor 16 [Source:HGNC Symbol;Acc:HGNC:8857]
IPECJ2_ENSSSCG00000026914 (pp) IPECJ2_ENSSSCG00000004970	Intra	0.96044	1	7.40017e-06	14245.5	0.96044	phospholipase A2 group XVI [Source:HGNC Symbol;Acc:HGNC:17825]	Unknown
IPECJ2_ENSSSCG00000002646 (pp) IPECJ2_XLOC_029898	Intra	0.956044	1	9.46978e-08	9305.5	0.956044	trafficking protein particle complex 2 like [Source:HGNC Symbol;Acc:HGNC:30887]	Proteasome subunit beta type-7 OS=Sus scrofa GN=PSMB7 PE=2 SV=2
IPECJ2_ENSSSCG00000026914 (pp) IPECJ2_ENSSSCG00000007160	Intra	0.964835	1	5.02606e-06	18397.5	0.964835	phospholipase A2 group XVI [Source:HGNC Symbol;Acc:HGNC:17825]	DDRGK domain containing 1 [Source:HGNC Symbol;Acc:HGNC:16110]
IPECJ2_ENSSSCG00000026914 (pp) IPECJ2_ENSSSCG00000012784	Intra	0.964835	1	5.02606e-06	18397.5	0.964835	phospholipase A2 group XVI [Source:HGNC Symbol;Acc:HGNC:17825]	signal sequence receptor subunit 4 [Source:HGNC Symbol;Acc:HGNC:11326]
IPECJ2_ENSSSCG00000026914 (pp) IPECJ2_ENSSSCG00000029161	Intra	0.96044	1	5.08105e-08	14245.5	0.96044	phospholipase A2 group XVI [Source:HGNC Symbol;Acc:HGNC:17825]	acireductone dioxygenase 1 [Source:HGNC Symbol;Acc:HGNC:30576]
IPECJ2_ENSSSCG00000026914 (pp) IPECJ2_ENSSSCG00000012842	Intra	0.956044	1	1.04633e-05	9305.5	0.956044	phospholipase A2 group XVI [Source:HGNC Symbol;Acc:HGNC:17825]	Unknown
IPECJ2_ENSSSCG00000026914 (pp) IPECJ2_ENSSSCG00000025928	Intra	0.96044	1	7.40017e-06	14245.5	0.96044	phospholipase A2 group XVI [Source:HGNC Symbol;Acc:HGNC:17825]	ribosomal protein L18 [Source:HGNC Symbol;Acc:HGNC:10310]
IPECJ2_ENSSSCG00000026914 (pp) IPECJ2_ENSSSCG00000029034	Intra	0.96044	1	7.40017e-06	14245.5	0.96044	phospholipase A2 group XVI [Source:HGNC Symbol;Acc:HGNC:17825]	cytochrome c oxidase subunit 4I1 [Source:HGNC Symbol;Acc:HGNC:2265]
IPECJ2_ENSSSCG00000002646 (pp) IPECJ2_ENSSSCG00000027353	Intra	0.951648	1	1.66161e-07	3309.5	0.951648	trafficking protein particle complex 2 like [Source:HGNC Symbol;Acc:HGNC:30887]	Unknown
IPECJ2_ENSSSCG00000026914 (pp) IPECJ2_ENSSSCG00000023139	Intra	0.951648	1	1.41528e-05	3309.5	0.951648	phospholipase A2 group XVI [Source:HGNC Symbol;Acc:HGNC:17825]	Isoform 2 of Methyltransferase-like protein 23 OS=Homo sapiens GN=METTL23
IPECJ2_ENSSSCG00000026914 (pp) IPECJ2_ENSSSCG00000024974	Intra	0.951648	1	1.41528e-05	3309.5	0.951648	phospholipase A2 group XVI [Source:HGNC Symbol;Acc:HGNC:17825]	ribosomal protein L13 [Source:HGNC Symbol;Acc:HGNC:10303]
IPECJ2_ENSSSCG00000026914 (pp) IPECJ2_ENSSSCG00000012965	Intra	0.956044	1	1.04633e-05	9305.5	0.956044	phospholipase A2 group XVI [Source:HGNC Symbol;Acc:HGNC:17825]	DR1 associated protein 1 [Source:HGNC Symbol;Acc:HGNC:3019]
IPECJ2_ENSSSCG00000026914 (pp) IPECJ2_ENSSSCG00000020790	Intra	0.956044	1	1.04633e-05	9305.5	0.956044	phospholipase A2 group XVI [Source:HGNC Symbol;Acc:HGNC:17825]	Uncharacterized protein OS=Sus scrofa GN=MYEOV2 PE=1 SV=1
IPECJ2_ENSSSCG00000026914 (pp) IPECJ2_ENSSSCG00000029830	Intra	0.951648	1	1.41528e-05	3309.5	0.951648	phospholipase A2 group XVI [Source:HGNC Symbol;Acc:HGNC:17825]	ribosomal protein L8 [Source:HGNC Symbol;Acc:HGNC:10368]
IPECJ2_ENSSSCG00000005481 (pp) AscL3_gene_GS_22808	Inter	0.951648	-1	1.41528e-05	3309.5	-0.951648	Unknown	227 kDa spindle- and centromere-associated protein OS=Parascaris univalens GN=PUMA1 PE=2 SV=1
IPECJ2_ENSSSCG00000005944 (pp) IPECJ2_ENSSSCG00000023041	Intra	0.951648	1	1.41528e-05	3309.5	0.951648	N-myc downstream regulated 1 [Source:HGNC Symbol;Acc:HGNC:7679]	poly(rC) binding protein 3 [Source:HGNC Symbol;Acc:HGNC:8651]
IPECJ2_ENSSSCG00000005987 (pp) IPECJ2_ENSSSCG00000000061	Intra	0.969231	-1	1.14652e-08	21732.5	-0.969231	Unknown	phosphomannomutase 1 [Source:HGNC Symbol;Acc:HGNC:9114]
IPECJ2_ENSSSCG00000005987 (pp) IPECJ2_ENSSSCG00000007331	Intra	0.969231	1	1.14652e-08	21732.5	0.969231	Unknown	RB transcriptional corepressor like 1 [Source:HGNC Symbol;Acc:HGNC:9893]
IPECJ2_ENSSSCG00000005987 (pp) IPECJ2_ENSSSCG00000024974	Intra	0.964835	-1	2.53041e-08	18397.5	-0.964835	Unknown	ribosomal protein L13 [Source:HGNC Symbol;Acc:HGNC:10303]
IPECJ2_ENSSSCG00000005987 (pp) IPECJ2_ENSSSCG00000004970	Intra	0.96044	-1	5.08105e-08	14245.5	-0.96044	Unknown	Unknown
IPECJ2_ENSSSCG00000005987 (pp) IPECJ2_ENSSSCG00000020790	Intra	0.964835	-1	2.53041e-08	18397.5	-0.964835	Unknown	Uncharacterized protein OS=Sus scrofa GN=MYEOV2 PE=1 SV=1
IPECJ2_ENSSSCG00000005987 (pp) IPECJ2_ENSSSCG00000024180	Intra	0.964835	1	2.53041e-08	18397.5	0.964835	Unknown	peripherial benzodiazepine receptor associated protein [Source:RefSeq peptide;Acc:NP_001009581]
IPECJ2_ENSSSCG00000005987 (pp) IPECJ2_ENSSSCG00000010063	Intra	0.96044	-1	5.08105e-08	14245.5	-0.96044	Unknown	Macrophage migration inhibitory factor OS=Sus scrofa GN=MIF PE=1 SV=3
IPECJ2_ENSSSCG00000005987 (pp) IPECJ2_ENSSSCG00000019018	Intra	0.96044	-1	5.08105e-08	14245.5	-0.96044	Unknown	Unknown
IPECJ2_ENSSSCG00000005987 (pp) IPECJ2_ENSSSCG00000007160	Intra	0.956044	-1	9.46978e-08	9305.5	-0.956044	Unknown	DDRGK domain containing 1 [Source:HGNC Symbol;Acc:HGNC:16110]
IPECJ2_ENSSSCG00000005987 (pp) IPECJ2_ENSSSCG00000027353	Intra	0.96044	-1	5.08105e-08	14245.5	-0.96044	Unknown	Unknown
IPECJ2_ENSSSCG00000005987 (pp) IPECJ2_ENSSSCG00000017705	Intra	0.956044	-1	1.04633e-05	9305.5	-0.956044	Unknown	C-C motif chemokine ligand 5 [Source:HGNC Symbol;Acc:HGNC:10632]
IPECJ2_ENSSSCG00000005987 (pp) IPECJ2_ENSSSCG00000027971	Intra	0.956044	-1	9.46978e-08	9305.5	-0.956044	Unknown	regulatory factor X associated ankyrin containing protein [Source:HGNC Symbol;Acc:HGNC:9987]
IPECJ2_ENSSSCG00000005987 (pp) IPECJ2_ENSSSCG00000012842	Intra	0.951648	-1	1.66161e-07	3309.5	-0.951648	Unknown	Unknown
IPECJ2_ENSSSCG00000027248 (pp) IPECJ2_XLOC_000015	Intra	0.951648	-1	1.41528e-05	3309.5	-0.951648	Unknown	Mitochondrial pyruvate carrier 1 OS=Bos taurus GN=MPC1 PE=1 SV=1
IPECJ2_ENSSSCG00000010063 (pp) IPECJ2_ENSSSCG00000019018	Intra	0.986813	1	1.88722e-07	28223.5	0.986813	Macrophage migration inhibitory factor OS=Sus scrofa GN=MIF PE=1 SV=3	Unknown
IPECJ2_ENSSSCG00000010063 (pp) IPECJ2_ENSSSCG00000024974	Intra	0.982418	1	5.27924e-07	27446.5	0.982418	Macrophage migration inhibitory factor OS=Sus scrofa GN=MIF PE=1 SV=3	ribosomal protein L13 [Source:HGNC Symbol;Acc:HGNC:10303]
IPECJ2_ENSSSCG00000010042 (pp) AscL3_XLOC_012561	Inter	0.951648	-1	1.41528e-05	3309.5	-0.951648	zinc finger protein 280B [Source:HGNC Symbol;Acc:HGNC:23022]	Unknown
IPECJ2_ENSSSCG00000010063 (pp) IPECJ2_ENSSSCG00000027353	Intra	0.978022	1	1.07614e-06	26153.5	0.978022	Macrophage migration inhibitory factor OS=Sus scrofa GN=MIF PE=1 SV=3	Unknown
IPECJ2_ENSSSCG00000010063 (pp) IPECJ2_XLOC_029898	Intra	0.978022	1	1.07614e-06	26153.5	0.978022	Macrophage migration inhibitory factor OS=Sus scrofa GN=MIF PE=1 SV=3	Proteasome subunit beta type-7 OS=Sus scrofa GN=PSMB7 PE=2 SV=2
IPECJ2_ENSSSCG00000014044 (pp) IPECJ2_ENSSSCG00000023325	Intra	0.964835	-1	2.53041e-08	18397.5	-0.964835	nuclear receptor binding SET domain protein 1 [Source:HGNC Symbol;Acc:HGNC:14234]	Aminoacylase-1 [Source:UniProtKB/Swiss-Prot;Acc:P37111]
IPECJ2_ENSSSCG00000014044 (pp) IPECJ2_ENSSSCG00000024254	Intra	0.964835	-1	2.53041e-08	18397.5	-0.964835	nuclear receptor binding SET domain protein 1 [Source:HGNC Symbol;Acc:HGNC:14234]	alkB homolog 7 [Source:HGNC Symbol;Acc:HGNC:21306]
IPECJ2_ENSSSCG00000010063 (pp) IPECJ2_ENSSSCG00000010631	Intra	0.969231	-1	1.14652e-08	21732.5	-0.969231	Macrophage migration inhibitory factor OS=Sus scrofa GN=MIF PE=1 SV=3	glycerol-3-phosphate acyltransferase, mitochondrial [Source:HGNC Symbol;Acc:HGNC:24865]
IPECJ2_ENSSSCG00000010063 (pp) IPECJ2_ENSSSCG00000020790	Intra	0.973626	1	1.97568e-06	24252.5	0.973626	Macrophage migration inhibitory factor OS=Sus scrofa GN=MIF PE=1 SV=3	Uncharacterized protein OS=Sus scrofa GN=MYEOV2 PE=1 SV=1
IPECJ2_ENSSSCG00000014044 (pp) IPECJ2_ENSSSCG00000007281	Intra	0.982418	-1	5.27924e-07	27446.5	-0.982418	nuclear receptor binding SET domain protein 1 [Source:HGNC Symbol;Acc:HGNC:14234]	microtubule associated protein 1 light chain 3 alpha [Source:HGNC Symbol;Acc:HGNC:6838]
IPECJ2_ENSSSCG00000010063 (pp) IPECJ2_ENSSSCG00000021825	Intra	0.973626	1	1.97568e-06	24252.5	0.973626	Macrophage migration inhibitory factor OS=Sus scrofa GN=MIF PE=1 SV=3	40S ribosomal protein S21 [Source:UniProtKB/Swiss-Prot;Acc:P63221]
IPECJ2_ENSSSCG00000014044 (pp) IPECJ2_ENSSSCG00000006777	Intra	0.964835	-1	2.53041e-08	18397.5	-0.964835	nuclear receptor binding SET domain protein 1 [Source:HGNC Symbol;Acc:HGNC:14234]	ras homolog family member C [Source:HGNC Symbol;Acc:HGNC:669]
IPECJ2_ENSSSCG00000010063 (pp) IPECJ2_ENSSSCG00000017705	Intra	0.969231	1	3.28443e-06	21732.5	0.969231	Macrophage migration inhibitory factor OS=Sus scrofa GN=MIF PE=1 SV=3	C-C motif chemokine ligand 5 [Source:HGNC Symbol;Acc:HGNC:10632]
IPECJ2_ENSSSCG00000014044 (pp) IPECJ2_ENSSSCG00000029855	Intra	0.96044	-1	5.08105e-08	14245.5	-0.96044	nuclear receptor binding SET domain protein 1 [Source:HGNC Symbol;Acc:HGNC:14234]	lipoma HMGIC fusion partner [Source:HGNC Symbol;Acc:HGNC:6586]
IPECJ2_ENSSSCG00000021542 (pp) IPECJ2_ENSSSCG00000009479	Intra	0.969231	-1	3.28443e-06	21732.5	-0.969231	Unknown	RNA binding motif protein 26 [Source:HGNC Symbol;Acc:HGNC:20327]
IPECJ2_ENSSSCG00000010063 (pp) IPECJ2_XLOC_011183	Intra	0.969231	1	3.28443e-06	21732.5	0.969231	Macrophage migration inhibitory factor OS=Sus scrofa GN=MIF PE=1 SV=3	Inosine triphosphate pyrophosphatase OS=Bos taurus GN=ITPA PE=2 SV=1
IPECJ2_ENSSSCG00000014044 (pp) AscL3_gene_GS_09942	Inter	0.96044	1	7.40017e-06	14245.5	0.96044	nuclear receptor binding SET domain protein 1 [Source:HGNC Symbol;Acc:HGNC:14234]	Sperm-specific protein OS=Ascaris suum GN=ASU_04668 PE=4 SV=1
IPECJ2_ENSSSCG00000021542 (pp) IPECJ2_ENSSSCG00000014283	Intra	0.982418	-1	5.27924e-07	27446.5	-0.982418	Unknown	kinesin family member 3A [Source:HGNC Symbol;Acc:HGNC:6319]
IPECJ2_ENSSSCG00000010063 (pp) IPECJ2_ENSSSCG00000026812	Intra	0.96044	1	7.40017e-06	14245.5	0.96044	Macrophage migration inhibitory factor OS=Sus scrofa GN=MIF PE=1 SV=3	Unknown
IPECJ2_ENSSSCG00000021542 (pp) IPECJ2_ENSSSCG00000025293	Intra	0.964835	-1	2.53041e-08	18397.5	-0.964835	Unknown	helicase like transcription factor [Source:HGNC Symbol;Acc:HGNC:11099]
IPECJ2_ENSSSCG00000021542 (pp) IPECJ2_XLOC_023587	Intra	0.969231	1	1.14652e-08	21732.5	0.969231	Unknown	IL-23 (Fragment) OS=Sus scrofa PE=2 SV=1
IPECJ2_ENSSSCG00000014044 (pp) IPECJ2_ENSSSCG00000011213	Intra	0.951648	1	1.66161e-07	3309.5	0.951648	nuclear receptor binding SET domain protein 1 [Source:HGNC Symbol;Acc:HGNC:14234]	topoisomerase (DNA) II beta 180kDa [Source:RefSeq peptide;Acc:NP_001245315]
IPECJ2_ENSSSCG00000027308 (pp) IPECJ2_ENSSSCG00000027840	Intra	0.969231	1	1.14652e-08	21732.5	0.969231	Unknown	Unknown
IPECJ2_ENSSSCG00000027308 (pp) IPECJ2_ENSSSCG00000027827	Intra	0.964835	1	2.53041e-08	18397.5	0.964835	Unknown	UDP-galactose-4-epimerase [Source:HGNC Symbol;Acc:HGNC:4116]
IPECJ2_ENSSSCG00000027308 (pp) IPECJ2_ENSSSCG00000007472	Intra	0.973626	1	1.97568e-06	24252.5	0.973626	Unknown	breast carcinoma amplified sequence 4 [Source:HGNC Symbol;Acc:HGNC:14367]
IPECJ2_ENSSSCG00000010063 (pp) IPECJ2_ENSSSCG00000027971	Intra	0.96044	1	5.08105e-08	14245.5	0.96044	Macrophage migration inhibitory factor OS=Sus scrofa GN=MIF PE=1 SV=3	regulatory factor X associated ankyrin containing protein [Source:HGNC Symbol;Acc:HGNC:9987]
IPECJ2_ENSSSCG00000027308 (pp) IPECJ2_ENSSSCG00000013267	Intra	0.969231	1	3.28443e-06	21732.5	0.969231	Unknown	peroxisomal biogenesis factor 16 [Source:HGNC Symbol;Acc:HGNC:8857]
IPECJ2_ENSSSCG00000010063 (pp) IPECJ2_ENSSSCG00000014076	Intra	0.956044	-1	1.04633e-05	9305.5	-0.956044	Macrophage migration inhibitory factor OS=Sus scrofa GN=MIF PE=1 SV=3	Isoform 2 of Soluble lamin-associated protein of 75 kDa OS=Homo sapiens GN=FAM169A
IPECJ2_ENSSSCG00000027308 (pp) IPECJ2_ENSSSCG00000029034	Intra	0.956044	1	1.04633e-05	9305.5	0.956044	Unknown	cytochrome c oxidase subunit 4I1 [Source:HGNC Symbol;Acc:HGNC:2265]
IPECJ2_ENSSSCG00000027308 (pp) IPECJ2_ENSSSCG00000029362	Intra	0.956044	1	1.04633e-05	9305.5	0.956044	Unknown	charged multivesicular body protein 2A [Source:HGNC Symbol;Acc:HGNC:30216]
IPECJ2_ENSSSCG00000010063 (pp) IPECJ2_ENSSSCG00000012965	Intra	0.956044	1	1.04633e-05	9305.5	0.956044	Macrophage migration inhibitory factor OS=Sus scrofa GN=MIF PE=1 SV=3	DR1 associated protein 1 [Source:HGNC Symbol;Acc:HGNC:3019]
IPECJ2_ENSSSCG00000027308 (pp) IPECJ2_ENSSSCG00000029830	Intra	0.964835	1	5.02606e-06	18397.5	0.964835	Unknown	ribosomal protein L8 [Source:HGNC Symbol;Acc:HGNC:10368]
IPECJ2_ENSSSCG00000014076 (pp) IPECJ2_ENSSSCG00000019018	Intra	0.978022	-1	1.55196e-09	26153.5	-0.978022	Isoform 2 of Soluble lamin-associated protein of 75 kDa OS=Homo sapiens GN=FAM169A	Unknown
IPECJ2_ENSSSCG00000027308 (pp) IPECJ2_ENSSSCG00000025928	Intra	0.956044	1	1.04633e-05	9305.5	0.956044	Unknown	ribosomal protein L18 [Source:HGNC Symbol;Acc:HGNC:10310]
IPECJ2_ENSSSCG00000014076 (pp) IPECJ2_ENSSSCG00000027353	Intra	0.964835	-1	2.53041e-08	18397.5	-0.964835	Isoform 2 of Soluble lamin-associated protein of 75 kDa OS=Homo sapiens GN=FAM169A	Unknown
IPECJ2_ENSSSCG00000014076 (pp) IPECJ2_ENSSSCG00000021825	Intra	0.973626	-1	4.59028e-09	24252.5	-0.973626	Isoform 2 of Soluble lamin-associated protein of 75 kDa OS=Homo sapiens GN=FAM169A	40S ribosomal protein S21 [Source:UniProtKB/Swiss-Prot;Acc:P63221]
IPECJ2_ENSSSCG00000027308 (pp) IPECJ2_ENSSSCG00000026914	Intra	0.951648	1	1.66161e-07	3309.5	0.951648	Unknown	phospholipase A2 group XVI [Source:HGNC Symbol;Acc:HGNC:17825]
IPECJ2_ENSSSCG00000014076 (pp) IPECJ2_XLOC_029898	Intra	0.973626	-1	4.59028e-09	24252.5	-0.973626	Isoform 2 of Soluble lamin-associated protein of 75 kDa OS=Homo sapiens GN=FAM169A	Proteasome subunit beta type-7 OS=Sus scrofa GN=PSMB7 PE=2 SV=2
IPECJ2_ENSSSCG00000021542 (pp) IPECJ2_XLOC_029898	Intra	0.951648	1	1.41528e-05	3309.5	0.951648	Unknown	Proteasome subunit beta type-7 OS=Sus scrofa GN=PSMB7 PE=2 SV=2
IPECJ2_ENSSSCG00000010063 (pp) IPECJ2_ENSSSCG00000012784	Intra	0.951648	1	1.41528e-05	3309.5	0.951648	Macrophage migration inhibitory factor OS=Sus scrofa GN=MIF PE=1 SV=3	signal sequence receptor subunit 4 [Source:HGNC Symbol;Acc:HGNC:11326]
IPECJ2_ENSSSCG00000027308 (pp) IPECJ2_ENSSSCG00000029161	Intra	0.951648	1	1.66161e-07	3309.5	0.951648	Unknown	acireductone dioxygenase 1 [Source:HGNC Symbol;Acc:HGNC:30576]
IPECJ2_ENSSSCG00000014076 (pp) IPECJ2_ENSSSCG00000020790	Intra	0.956044	-1	9.46978e-08	9305.5	-0.956044	Isoform 2 of Soluble lamin-associated protein of 75 kDa OS=Homo sapiens GN=FAM169A	Uncharacterized protein OS=Sus scrofa GN=MYEOV2 PE=1 SV=1
IPECJ2_ENSSSCG00000010063 (pp) IPECJ2_ENSSSCG00000029362	Intra	0.951648	1	1.66161e-07	3309.5	0.951648	Macrophage migration inhibitory factor OS=Sus scrofa GN=MIF PE=1 SV=3	charged multivesicular body protein 2A [Source:HGNC Symbol;Acc:HGNC:30216]
IPECJ2_ENSSSCG00000010239 (pp) IPECJ2_ENSSSCG00000022867	Intra	0.969231	-1	1.14652e-08	21732.5	-0.969231	RUN and FYVE domain containing 2 [Source:HGNC Symbol;Acc:HGNC:19761]	Unknown
IPECJ2_ENSSSCG00000027353 (pp) IPECJ2_XLOC_029898	Intra	0.986813	1	1.88722e-07	28223.5	0.986813	Unknown	Proteasome subunit beta type-7 OS=Sus scrofa GN=PSMB7 PE=2 SV=2
IPECJ2_ENSSSCG00000010239 (pp) IPECJ2_ENSSSCG00000016835	Intra	0.964835	1	5.02606e-06	18397.5	0.964835	RUN and FYVE domain containing 2 [Source:HGNC Symbol;Acc:HGNC:19761]	S-phase kinase-associated protein 2, E3 ubiquitin protein ligase [Source:HGNC Symbol;Acc:HGNC:10901]
IPECJ2_ENSSSCG00000010239 (pp) IPECJ2_ENSSSCG00000014283	Intra	0.956044	1	1.04633e-05	9305.5	0.956044	RUN and FYVE domain containing 2 [Source:HGNC Symbol;Acc:HGNC:19761]	kinesin family member 3A [Source:HGNC Symbol;Acc:HGNC:6319]
IPECJ2_ENSSSCG00000010239 (pp) IPECJ2_ENSSSCG00000003772	Intra	0.951648	1	1.41528e-05	3309.5	0.951648	RUN and FYVE domain containing 2 [Source:HGNC Symbol;Acc:HGNC:19761]	zinc finger ZZ-type containing 3 [Source:HGNC Symbol;Acc:HGNC:24523]
IPECJ2_ENSSSCG00000027353 (pp) IPECJ2_XLOC_011183	Intra	0.96044	1	7.40017e-06	14245.5	0.96044	Unknown	Inosine triphosphate pyrophosphatase OS=Bos taurus GN=ITPA PE=2 SV=1
IPECJ2_ENSSSCG00000027410 (pp) IPECJ2_ENSSSCG00000014623	Intra	0.964835	-1	5.02606e-06	18397.5	-0.964835	CBFA2/RUNX1 translocation partner 2 [Source:HGNC Symbol;Acc:HGNC:1536]	translocase of inner mitochondrial membrane 10 homolog B (yeast) [Source:HGNC Symbol;Acc:HGNC:4022]
IPECJ2_ENSSSCG00000027410 (pp) AscL3_gene_GS_06937	Inter	0.956044	1	1.04633e-05	9305.5	0.956044	CBFA2/RUNX1 translocation partner 2 [Source:HGNC Symbol;Acc:HGNC:1536]	Bm6553 OS=Brugia malayi GN=Bm6553 PE=4 SV=1
IPECJ2_ENSSSCG00000006090 (pp) IPECJ2_ENSSSCG00000014114	Intra	0.964835	1	5.02606e-06	18397.5	0.964835	mitochondrial transcription termination factor 3 [Source:HGNC Symbol;Acc:HGNC:24258]	poly(A) RNA polymerase D4, non-canonical [Source:HGNC Symbol;Acc:HGNC:26776]
IPECJ2_ENSSSCG00000021825 (pp) IPECJ2_XLOC_029898	Intra	0.982418	1	4.10718e-10	27446.5	0.982418	40S ribosomal protein S21 [Source:UniProtKB/Swiss-Prot;Acc:P63221]	Proteasome subunit beta type-7 OS=Sus scrofa GN=PSMB7 PE=2 SV=2
IPECJ2_ENSSSCG00000021825 (pp) IPECJ2_ENSSSCG00000027353	Intra	0.978022	1	1.55196e-09	26153.5	0.978022	40S ribosomal protein S21 [Source:UniProtKB/Swiss-Prot;Acc:P63221]	Unknown
IPECJ2_ENSSSCG00000027527 (pp) AscL3_gene_Liv_03967	Inter	0.978022	-1	1.07614e-06	26153.5	-0.978022	Unknown	Venom allergen 5 OS=Ascaris suum GN=ASU_02857 PE=3 SV=1
IPECJ2_ENSSSCG00000014114 (pp) IPECJ2_ENSSSCG00000024984	Intra	0.982418	-1	4.10718e-10	27446.5	-0.982418	poly(A) RNA polymerase D4, non-canonical [Source:HGNC Symbol;Acc:HGNC:26776]	Unknown
IPECJ2_ENSSSCG00000027527 (pp) IPECJ2_ENSSSCG00000015073	Intra	0.978022	1	1.07614e-06	26153.5	0.978022	Unknown	transgelin [Source:HGNC Symbol;Acc:HGNC:11553]
IPECJ2_ENSSSCG00000027527 (pp) AscL3_gene_GS_02546	Inter	0.973626	-1	1.97568e-06	24252.5	-0.973626	Unknown	Venom allergen 5 OS=Ascaris suum GN=ASU_02857 PE=3 SV=1
IPECJ2_ENSSSCG00000014114 (pp) IPECJ2_ENSSSCG00000028100	Intra	0.96044	1	5.08105e-08	14245.5	0.96044	poly(A) RNA polymerase D4, non-canonical [Source:HGNC Symbol;Acc:HGNC:26776]	Unknown
IPECJ2_ENSSSCG00000014114 (pp) IPECJ2_ENSSSCG00000008600	Intra	0.956044	1	1.04633e-05	9305.5	0.956044	poly(A) RNA polymerase D4, non-canonical [Source:HGNC Symbol;Acc:HGNC:26776]	pumilio RNA binding family member 2 [Source:HGNC Symbol;Acc:HGNC:14958]
IPECJ2_ENSSSCG00000014114 (pp) IPECJ2_ENSSSCG00000024666	Intra	0.964835	-1	2.53041e-08	18397.5	-0.964835	poly(A) RNA polymerase D4, non-canonical [Source:HGNC Symbol;Acc:HGNC:26776]	FXYD domain containing ion transport regulator 3 [Source:HGNC Symbol;Acc:HGNC:4027]
IPECJ2_ENSSSCG00000027573 (pp) IPECJ2_ENSSSCG00000026914	Intra	0.964835	1	5.02606e-06	18397.5	0.964835	ribosomal protein L29 [Source:HGNC Symbol;Acc:HGNC:10331]	phospholipase A2 group XVI [Source:HGNC Symbol;Acc:HGNC:17825]
IPECJ2_ENSSSCG00000027573 (pp) IPECJ2_ENSSSCG00000013619	Intra	0.96044	1	7.40017e-06	14245.5	0.96044	ribosomal protein L29 [Source:HGNC Symbol;Acc:HGNC:10331]	SWIM-type zinc finger 7 associated protein 1 [Source:HGNC Symbol;Acc:HGNC:26638]
IPECJ2_ENSSSCG00000027573 (pp) AscL3_gene_GS_12056	Inter	0.964835	1	5.02606e-06	18397.5	0.964835	ribosomal protein L29 [Source:HGNC Symbol;Acc:HGNC:10331]	Elongation of very long chain fatty acids protein OS=Ascaris suum GN=ASU_11627 PE=3 SV=1
IPECJ2_ENSSSCG00000003080 (pp) IPECJ2_ENSSSCG00000003772	Intra	0.973626	-1	4.59028e-09	24252.5	-0.973626	immunoglobulin superfamily member 23 [Source:HGNC Symbol;Acc:HGNC:40040]	zinc finger ZZ-type containing 3 [Source:HGNC Symbol;Acc:HGNC:24523]
IPECJ2_ENSSSCG00000027573 (pp) IPECJ2_ENSSSCG00000007189	Intra	0.951648	1	1.41528e-05	3309.5	0.951648	ribosomal protein L29 [Source:HGNC Symbol;Acc:HGNC:10331]	syndecan binding protein 2 [Source:HGNC Symbol;Acc:HGNC:15756]
IPECJ2_ENSSSCG00000027573 (pp) IPECJ2_ENSSSCG00000016395	Intra	0.96044	-1	5.08105e-08	14245.5	-0.96044	ribosomal protein L29 [Source:HGNC Symbol;Acc:HGNC:10331]	replication timing regulatory factor 1 [Source:HGNC Symbol;Acc:HGNC:23207]
IPECJ2_ENSSSCG00000027573 (pp) IPECJ2_XLOC_007562	Intra	0.956044	1	1.04633e-05	9305.5	0.956044	ribosomal protein L29 [Source:HGNC Symbol;Acc:HGNC:10331]	Unknown
IPECJ2_ENSSSCG00000003080 (pp) IPECJ2_ENSSSCG00000007281	Intra	0.96044	1	7.40017e-06	14245.5	0.96044	immunoglobulin superfamily member 23 [Source:HGNC Symbol;Acc:HGNC:40040]	microtubule associated protein 1 light chain 3 alpha [Source:HGNC Symbol;Acc:HGNC:6838]
IPECJ2_ENSSSCG00000027573 (pp) IPECJ2_ENSSSCG00000029161	Intra	0.951648	1	1.66161e-07	3309.5	0.951648	ribosomal protein L29 [Source:HGNC Symbol;Acc:HGNC:10331]	acireductone dioxygenase 1 [Source:HGNC Symbol;Acc:HGNC:30576]
IPECJ2_ENSSSCG00000003080 (pp) IPECJ2_ENSSSCG00000015786	Intra	0.96044	-1	5.08105e-08	14245.5	-0.96044	immunoglobulin superfamily member 23 [Source:HGNC Symbol;Acc:HGNC:40040]	Unknown
IPECJ2_ENSSSCG00000003080 (pp) IPECJ2_ENSSSCG00000025928	Intra	0.969231	1	1.14652e-08	21732.5	0.969231	immunoglobulin superfamily member 23 [Source:HGNC Symbol;Acc:HGNC:40040]	ribosomal protein L18 [Source:HGNC Symbol;Acc:HGNC:10310]
IPECJ2_ENSSSCG00000027573 (pp) IPECJ2_ENSSSCG00000012916	Intra	0.951648	1	1.66161e-07	3309.5	0.951648	ribosomal protein L29 [Source:HGNC Symbol;Acc:HGNC:10331]	Unknown
IPECJ2_XLOC_023587 (pp) IPECJ2_XLOC_029898	Intra	0.956044	1	1.04633e-05	9305.5	0.956044	IL-23 (Fragment) OS=Sus scrofa PE=2 SV=1	Proteasome subunit beta type-7 OS=Sus scrofa GN=PSMB7 PE=2 SV=2
IPECJ2_ENSSSCG00000003080 (pp) IPECJ2_ENSSSCG00000029034	Intra	0.969231	1	1.14652e-08	21732.5	0.969231	immunoglobulin superfamily member 23 [Source:HGNC Symbol;Acc:HGNC:40040]	cytochrome c oxidase subunit 4I1 [Source:HGNC Symbol;Acc:HGNC:2265]
IPECJ2_ENSSSCG00000027573 (pp) IPECJ2_ENSSSCG00000012960	Intra	0.951648	1	1.41528e-05	3309.5	0.951648	ribosomal protein L29 [Source:HGNC Symbol;Acc:HGNC:10331]	cystatin E/M [Source:HGNC Symbol;Acc:HGNC:2478]
IPECJ2_ENSSSCG00000003080 (pp) IPECJ2_ENSSSCG00000013267	Intra	0.956044	1	9.46978e-08	9305.5	0.956044	immunoglobulin superfamily member 23 [Source:HGNC Symbol;Acc:HGNC:40040]	peroxisomal biogenesis factor 16 [Source:HGNC Symbol;Acc:HGNC:8857]
IPECJ2_ENSSSCG00000003080 (pp) IPECJ2_ENSSSCG00000029830	Intra	0.956044	1	9.46978e-08	9305.5	0.956044	immunoglobulin superfamily member 23 [Source:HGNC Symbol;Acc:HGNC:40040]	ribosomal protein L8 [Source:HGNC Symbol;Acc:HGNC:10368]
IPECJ2_ENSSSCG00000003080 (pp) IPECJ2_XLOC_007562	Intra	0.956044	1	9.46978e-08	9305.5	0.956044	immunoglobulin superfamily member 23 [Source:HGNC Symbol;Acc:HGNC:40040]	Unknown
IPECJ2_ENSSSCG00000003080 (pp) IPECJ2_ENSSSCG00000014177	Intra	0.956044	-1	9.46978e-08	9305.5	-0.956044	immunoglobulin superfamily member 23 [Source:HGNC Symbol;Acc:HGNC:40040]	chromodomain helicase DNA binding protein 1 [Source:HGNC Symbol;Acc:HGNC:1915]
IPECJ2_ENSSSCG00000003080 (pp) IPECJ2_ENSSSCG00000029362	Intra	0.956044	1	9.46978e-08	9305.5	0.956044	immunoglobulin superfamily member 23 [Source:HGNC Symbol;Acc:HGNC:40040]	charged multivesicular body protein 2A [Source:HGNC Symbol;Acc:HGNC:30216]
IPECJ2_ENSSSCG00000003080 (pp) IPECJ2_ENSSSCG00000023110	Intra	0.951648	1	1.66161e-07	3309.5	0.951648	immunoglobulin superfamily member 23 [Source:HGNC Symbol;Acc:HGNC:40040]	UBX domain protein 1 [Source:HGNC Symbol;Acc:HGNC:18402]
IPECJ2_ENSSSCG00000003080 (pp) IPECJ2_ENSSSCG00000006777	Intra	0.951648	1	1.66161e-07	3309.5	0.951648	immunoglobulin superfamily member 23 [Source:HGNC Symbol;Acc:HGNC:40040]	ras homolog family member C [Source:HGNC Symbol;Acc:HGNC:669]
IPECJ2_ENSSSCG00000003080 (pp) IPECJ2_ENSSSCG00000007472	Intra	0.951648	1	1.66161e-07	3309.5	0.951648	immunoglobulin superfamily member 23 [Source:HGNC Symbol;Acc:HGNC:40040]	breast carcinoma amplified sequence 4 [Source:HGNC Symbol;Acc:HGNC:14367]
IPECJ2_ENSSSCG00000003080 (pp) IPECJ2_ENSSSCG00000023139	Intra	0.951648	1	1.66161e-07	3309.5	0.951648	immunoglobulin superfamily member 23 [Source:HGNC Symbol;Acc:HGNC:40040]	Isoform 2 of Methyltransferase-like protein 23 OS=Homo sapiens GN=METTL23
IPECJ2_ENSSSCG00000014177 (pp) IPECJ2_ENSSSCG00000026812	Intra	0.982418	-1	4.10718e-10	27446.5	-0.982418	chromodomain helicase DNA binding protein 1 [Source:HGNC Symbol;Acc:HGNC:1915]	Unknown
IPECJ2_ENSSSCG00000027827 (pp) IPECJ2_ENSSSCG00000006777	Intra	0.986813	1	1.88722e-07	28223.5	0.986813	UDP-galactose-4-epimerase [Source:HGNC Symbol;Acc:HGNC:4116]	ras homolog family member C [Source:HGNC Symbol;Acc:HGNC:669]
IPECJ2_ENSSSCG00000027827 (pp) IPECJ2_ENSSSCG00000001423	Intra	0.978022	1	1.55196e-09	26153.5	0.978022	UDP-galactose-4-epimerase [Source:HGNC Symbol;Acc:HGNC:4116]	negative elongation factor complex member E [Source:HGNC Symbol;Acc:HGNC:13974]
IPECJ2_ENSSSCG00000014177 (pp) IPECJ2_ENSSSCG00000016395	Intra	0.969231	1	1.14652e-08	21732.5	0.969231	chromodomain helicase DNA binding protein 1 [Source:HGNC Symbol;Acc:HGNC:1915]	replication timing regulatory factor 1 [Source:HGNC Symbol;Acc:HGNC:23207]
IPECJ2_ENSSSCG00000014177 (pp) IPECJ2_XLOC_007562	Intra	0.986813	-1	7.37952e-11	28223.5	-0.986813	chromodomain helicase DNA binding protein 1 [Source:HGNC Symbol;Acc:HGNC:1915]	Unknown
IPECJ2_ENSSSCG00000014177 (pp) IPECJ2_ENSSSCG00000000061	Intra	0.982418	-1	4.10718e-10	27446.5	-0.982418	chromodomain helicase DNA binding protein 1 [Source:HGNC Symbol;Acc:HGNC:1915]	phosphomannomutase 1 [Source:HGNC Symbol;Acc:HGNC:9114]
IPECJ2_ENSSSCG00000014177 (pp) IPECJ2_ENSSSCG00000023139	Intra	0.964835	-1	5.02606e-06	18397.5	-0.964835	chromodomain helicase DNA binding protein 1 [Source:HGNC Symbol;Acc:HGNC:1915]	Isoform 2 of Methyltransferase-like protein 23 OS=Homo sapiens GN=METTL23
IPECJ2_ENSSSCG00000027827 (pp) IPECJ2_ENSSSCG00000025928	Intra	0.973626	1	1.97568e-06	24252.5	0.973626	UDP-galactose-4-epimerase [Source:HGNC Symbol;Acc:HGNC:4116]	ribosomal protein L18 [Source:HGNC Symbol;Acc:HGNC:10310]
IPECJ2_ENSSSCG00000027827 (pp) IPECJ2_ENSSSCG00000029034	Intra	0.973626	1	1.97568e-06	24252.5	0.973626	UDP-galactose-4-epimerase [Source:HGNC Symbol;Acc:HGNC:4116]	cytochrome c oxidase subunit 4I1 [Source:HGNC Symbol;Acc:HGNC:2265]
IPECJ2_ENSSSCG00000014177 (pp) IPECJ2_ENSSSCG00000004970	Intra	0.96044	-1	7.40017e-06	14245.5	-0.96044	chromodomain helicase DNA binding protein 1 [Source:HGNC Symbol;Acc:HGNC:1915]	Unknown
IPECJ2_ENSSSCG00000014177 (pp) IPECJ2_ENSSSCG00000026914	Intra	0.969231	-1	1.14652e-08	21732.5	-0.969231	chromodomain helicase DNA binding protein 1 [Source:HGNC Symbol;Acc:HGNC:1915]	phospholipase A2 group XVI [Source:HGNC Symbol;Acc:HGNC:17825]
IPECJ2_ENSSSCG00000027827 (pp) IPECJ2_ENSSSCG00000013267	Intra	0.978022	1	1.07614e-06	26153.5	0.978022	UDP-galactose-4-epimerase [Source:HGNC Symbol;Acc:HGNC:4116]	peroxisomal biogenesis factor 16 [Source:HGNC Symbol;Acc:HGNC:8857]
IPECJ2_ENSSSCG00000027827 (pp) IPECJ2_ENSSSCG00000029830	Intra	0.978022	1	1.07614e-06	26153.5	0.978022	UDP-galactose-4-epimerase [Source:HGNC Symbol;Acc:HGNC:4116]	ribosomal protein L8 [Source:HGNC Symbol;Acc:HGNC:10368]
IPECJ2_ENSSSCG00000014177 (pp) IPECJ2_ENSSSCG00000012784	Intra	0.964835	-1	5.02606e-06	18397.5	-0.964835	chromodomain helicase DNA binding protein 1 [Source:HGNC Symbol;Acc:HGNC:1915]	signal sequence receptor subunit 4 [Source:HGNC Symbol;Acc:HGNC:11326]
IPECJ2_ENSSSCG00000022273 (pp) IPECJ2_ENSSSCG00000005944	Intra	0.96044	-1	5.08105e-08	14245.5	-0.96044	Unknown	N-myc downstream regulated 1 [Source:HGNC Symbol;Acc:HGNC:7679]
IPECJ2_ENSSSCG00000027827 (pp) IPECJ2_ENSSSCG00000023110	Intra	0.969231	1	3.28443e-06	21732.5	0.969231	UDP-galactose-4-epimerase [Source:HGNC Symbol;Acc:HGNC:4116]	UBX domain protein 1 [Source:HGNC Symbol;Acc:HGNC:18402]
IPECJ2_ENSSSCG00000014177 (pp) IPECJ2_ENSSSCG00000027971	Intra	0.96044	-1	5.08105e-08	14245.5	-0.96044	chromodomain helicase DNA binding protein 1 [Source:HGNC Symbol;Acc:HGNC:1915]	regulatory factor X associated ankyrin containing protein [Source:HGNC Symbol;Acc:HGNC:9987]
IPECJ2_ENSSSCG00000014177 (pp) IPECJ2_ENSSSCG00000007646	Intra	0.956044	-1	1.04633e-05	9305.5	-0.956044	chromodomain helicase DNA binding protein 1 [Source:HGNC Symbol;Acc:HGNC:1915]	late endosomal/lysosomal adaptor, MAPK and MTOR activator 4 [Source:HGNC Symbol;Acc:HGNC:33772]
IPECJ2_ENSSSCG00000027827 (pp) IPECJ2_ENSSSCG00000027840	Intra	0.964835	1	2.53041e-08	18397.5	0.964835	UDP-galactose-4-epimerase [Source:HGNC Symbol;Acc:HGNC:4116]	Unknown
IPECJ2_ENSSSCG00000027827 (pp) IPECJ2_ENSSSCG00000007472	Intra	0.969231	1	3.28443e-06	21732.5	0.969231	UDP-galactose-4-epimerase [Source:HGNC Symbol;Acc:HGNC:4116]	breast carcinoma amplified sequence 4 [Source:HGNC Symbol;Acc:HGNC:14367]
IPECJ2_ENSSSCG00000014177 (pp) IPECJ2_ENSSSCG00000012965	Intra	0.96044	-1	7.40017e-06	14245.5	-0.96044	chromodomain helicase DNA binding protein 1 [Source:HGNC Symbol;Acc:HGNC:1915]	DR1 associated protein 1 [Source:HGNC Symbol;Acc:HGNC:3019]
IPECJ2_ENSSSCG00000022273 (pp) IPECJ2_ENSSSCG00000003015	Intra	0.969231	-1	1.14652e-08	21732.5	-0.969231	Unknown	Unknown
IPECJ2_ENSSSCG00000027827 (pp) IPECJ2_ENSSSCG00000022647	Intra	0.969231	1	3.28443e-06	21732.5	0.969231	UDP-galactose-4-epimerase [Source:HGNC Symbol;Acc:HGNC:4116]	translocase of inner mitochondrial membrane 17 homolog B (yeast) [Source:HGNC Symbol;Acc:HGNC:17310]
IPECJ2_ENSSSCG00000014177 (pp) IPECJ2_ENSSSCG00000020817	Intra	0.96044	-1	7.40017e-06	14245.5	-0.96044	chromodomain helicase DNA binding protein 1 [Source:HGNC Symbol;Acc:HGNC:1915]	40S ribosomal protein S16 [Source:UniProtKB/Swiss-Prot;Acc:Q29201]
IPECJ2_ENSSSCG00000014177 (pp) IPECJ2_ENSSSCG00000029362	Intra	0.956044	-1	9.46978e-08	9305.5	-0.956044	chromodomain helicase DNA binding protein 1 [Source:HGNC Symbol;Acc:HGNC:1915]	charged multivesicular body protein 2A [Source:HGNC Symbol;Acc:HGNC:30216]
IPECJ2_ENSSSCG00000027827 (pp) IPECJ2_ENSSSCG00000029161	Intra	0.951648	1	1.66161e-07	3309.5	0.951648	UDP-galactose-4-epimerase [Source:HGNC Symbol;Acc:HGNC:4116]	acireductone dioxygenase 1 [Source:HGNC Symbol;Acc:HGNC:30576]
IPECJ2_ENSSSCG00000014177 (pp) IPECJ2_ENSSSCG00000007160	Intra	0.951648	-1	1.66161e-07	3309.5	-0.951648	chromodomain helicase DNA binding protein 1 [Source:HGNC Symbol;Acc:HGNC:1915]	DDRGK domain containing 1 [Source:HGNC Symbol;Acc:HGNC:16110]
IPECJ2_ENSSSCG00000014177 (pp) IPECJ2_ENSSSCG00000025928	Intra	0.956044	-1	1.04633e-05	9305.5	-0.956044	chromodomain helicase DNA binding protein 1 [Source:HGNC Symbol;Acc:HGNC:1915]	ribosomal protein L18 [Source:HGNC Symbol;Acc:HGNC:10310]
IPECJ2_ENSSSCG00000027827 (pp) IPECJ2_ENSSSCG00000001884	Intra	0.96044	1	7.40017e-06	14245.5	0.96044	UDP-galactose-4-epimerase [Source:HGNC Symbol;Acc:HGNC:4116]	COMM domain containing 4 [Source:HGNC Symbol;Acc:HGNC:26027]
IPECJ2_ENSSSCG00000014177 (pp) IPECJ2_ENSSSCG00000029034	Intra	0.956044	-1	9.46978e-08	9305.5	-0.956044	chromodomain helicase DNA binding protein 1 [Source:HGNC Symbol;Acc:HGNC:1915]	cytochrome c oxidase subunit 4I1 [Source:HGNC Symbol;Acc:HGNC:2265]
IPECJ2_ENSSSCG00000027827 (pp) IPECJ2_ENSSSCG00000029362	Intra	0.96044	1	7.40017e-06	14245.5	0.96044	UDP-galactose-4-epimerase [Source:HGNC Symbol;Acc:HGNC:4116]	charged multivesicular body protein 2A [Source:HGNC Symbol;Acc:HGNC:30216]
IPECJ2_ENSSSCG00000027840 (pp) IPECJ2_ENSSSCG00000029034	Intra	0.982418	1	5.27924e-07	27446.5	0.982418	Unknown	cytochrome c oxidase subunit 4I1 [Source:HGNC Symbol;Acc:HGNC:2265]
IPECJ2_ENSSSCG00000010446 (pp) IPECJ2_ENSSSCG00000005097	Intra	0.964835	1	5.02606e-06	18397.5	0.964835	AMSH-like protease [Source:RefSeq peptide;Acc:NP_001230272]	small nuclear RNA activating complex polypeptide 1 [Source:HGNC Symbol;Acc:HGNC:11134]
IPECJ2_ENSSSCG00000027840 (pp) IPECJ2_ENSSSCG00000029830	Intra	0.978022	1	1.07614e-06	26153.5	0.978022	Unknown	ribosomal protein L8 [Source:HGNC Symbol;Acc:HGNC:10368]
IPECJ2_ENSSSCG00000027840 (pp) IPECJ2_ENSSSCG00000029161	Intra	0.986813	1	7.37952e-11	28223.5	0.986813	Unknown	acireductone dioxygenase 1 [Source:HGNC Symbol;Acc:HGNC:30576]
IPECJ2_ENSSSCG00000027840 (pp) IPECJ2_ENSSSCG00000025928	Intra	0.982418	1	5.27924e-07	27446.5	0.982418	Unknown	ribosomal protein L18 [Source:HGNC Symbol;Acc:HGNC:10310]
IPECJ2_ENSSSCG00000014177 (pp) IPECJ2_ENSSSCG00000027353	Intra	0.951648	-1	1.66161e-07	3309.5	-0.951648	chromodomain helicase DNA binding protein 1 [Source:HGNC Symbol;Acc:HGNC:1915]	Unknown
IPECJ2_ENSSSCG00000027840 (pp) IPECJ2_ENSSSCG00000027971	Intra	0.964835	1	2.53041e-08	18397.5	0.964835	Unknown	regulatory factor X associated ankyrin containing protein [Source:HGNC Symbol;Acc:HGNC:9987]
IPECJ2_ENSSSCG00000014177 (pp) IPECJ2_ENSSSCG00000024974	Intra	0.951648	-1	1.41528e-05	3309.5	-0.951648	chromodomain helicase DNA binding protein 1 [Source:HGNC Symbol;Acc:HGNC:1915]	ribosomal protein L13 [Source:HGNC Symbol;Acc:HGNC:10303]
IPECJ2_ENSSSCG00000027840 (pp) IPECJ2_ENSSSCG00000012965	Intra	0.973626	1	1.97568e-06	24252.5	0.973626	Unknown	DR1 associated protein 1 [Source:HGNC Symbol;Acc:HGNC:3019]
IPECJ2_ENSSSCG00000027840 (pp) IPECJ2_ENSSSCG00000029362	Intra	0.973626	1	1.97568e-06	24252.5	0.973626	Unknown	charged multivesicular body protein 2A [Source:HGNC Symbol;Acc:HGNC:30216]
IPECJ2_ENSSSCG00000027840 (pp) IPECJ2_ENSSSCG00000026812	Intra	0.956044	1	1.04633e-05	9305.5	0.956044	Unknown	Unknown
IPECJ2_ENSSSCG00000022417 (pp) IPECJ2_ENSSSCG00000006090	Intra	0.973626	-1	4.59028e-09	24252.5	-0.973626	hepatocyte nuclear factor 1-beta [Source:RefSeq peptide;Acc:NP_999121]	mitochondrial transcription termination factor 3 [Source:HGNC Symbol;Acc:HGNC:24258]
IPECJ2_ENSSSCG00000022417 (pp) IPECJ2_ENSSSCG00000005097	Intra	0.96044	-1	7.40017e-06	14245.5	-0.96044	hepatocyte nuclear factor 1-beta [Source:RefSeq peptide;Acc:NP_999121]	small nuclear RNA activating complex polypeptide 1 [Source:HGNC Symbol;Acc:HGNC:11134]
IPECJ2_ENSSSCG00000027971 (pp) IPECJ2_ENSSSCG00000021825	Intra	0.982418	1	5.27924e-07	27446.5	0.982418	regulatory factor X associated ankyrin containing protein [Source:HGNC Symbol;Acc:HGNC:9987]	40S ribosomal protein S21 [Source:UniProtKB/Swiss-Prot;Acc:P63221]
IPECJ2_ENSSSCG00000027971 (pp) IPECJ2_ENSSSCG00000029362	Intra	0.982418	1	5.27924e-07	27446.5	0.982418	regulatory factor X associated ankyrin containing protein [Source:HGNC Symbol;Acc:HGNC:9987]	charged multivesicular body protein 2A [Source:HGNC Symbol;Acc:HGNC:30216]
IPECJ2_ENSSSCG00000027971 (pp) IPECJ2_XLOC_029898	Intra	0.973626	1	1.97568e-06	24252.5	0.973626	regulatory factor X associated ankyrin containing protein [Source:HGNC Symbol;Acc:HGNC:9987]	Proteasome subunit beta type-7 OS=Sus scrofa GN=PSMB7 PE=2 SV=2
IPECJ2_ENSSSCG00000027971 (pp) IPECJ2_XLOC_011183	Intra	0.969231	1	3.28443e-06	21732.5	0.969231	regulatory factor X associated ankyrin containing protein [Source:HGNC Symbol;Acc:HGNC:9987]	Inosine triphosphate pyrophosphatase OS=Bos taurus GN=ITPA PE=2 SV=1
IPECJ2_ENSSSCG00000027971 (pp) IPECJ2_ENSSSCG00000019018	Intra	0.978022	1	1.07614e-06	26153.5	0.978022	regulatory factor X associated ankyrin containing protein [Source:HGNC Symbol;Acc:HGNC:9987]	Unknown
IPECJ2_ENSSSCG00000027971 (pp) IPECJ2_ENSSSCG00000027353	Intra	0.973626	1	1.97568e-06	24252.5	0.973626	regulatory factor X associated ankyrin containing protein [Source:HGNC Symbol;Acc:HGNC:9987]	Unknown
IPECJ2_ENSSSCG00000028100 (pp) IPECJ2_ENSSSCG00000007189	Intra	0.964835	-1	5.02606e-06	18397.5	-0.964835	Unknown	syndecan binding protein 2 [Source:HGNC Symbol;Acc:HGNC:15756]
IPECJ2_ENSSSCG00000028100 (pp) IPECJ2_ENSSSCG00000023110	Intra	0.964835	-1	2.53041e-08	18397.5	-0.964835	Unknown	UBX domain protein 1 [Source:HGNC Symbol;Acc:HGNC:18402]
IPECJ2_ENSSSCG00000028100 (pp) AscL3_gene_GS_09942	Inter	0.956044	1	1.04633e-05	9305.5	0.956044	Unknown	Sperm-specific protein OS=Ascaris suum GN=ASU_04668 PE=4 SV=1
IPECJ2_ENSSSCG00000028100 (pp) IPECJ2_ENSSSCG00000024666	Intra	0.964835	-1	5.02606e-06	18397.5	-0.964835	Unknown	FXYD domain containing ion transport regulator 3 [Source:HGNC Symbol;Acc:HGNC:4027]
IPECJ2_ENSSSCG00000028100 (pp) IPECJ2_ENSSSCG00000024254	Intra	0.956044	-1	9.46978e-08	9305.5	-0.956044	Unknown	alkB homolog 7 [Source:HGNC Symbol;Acc:HGNC:21306]
IPECJ2_ENSSSCG00000022647 (pp) IPECJ2_ENSSSCG00000013267	Intra	0.982418	1	5.27924e-07	27446.5	0.982418	translocase of inner mitochondrial membrane 17 homolog B (yeast) [Source:HGNC Symbol;Acc:HGNC:17310]	peroxisomal biogenesis factor 16 [Source:HGNC Symbol;Acc:HGNC:8857]
IPECJ2_ENSSSCG00000022647 (pp) IPECJ2_ENSSSCG00000027840	Intra	0.982418	1	4.10718e-10	27446.5	0.982418	translocase of inner mitochondrial membrane 17 homolog B (yeast) [Source:HGNC Symbol;Acc:HGNC:17310]	Unknown
IPECJ2_ENSSSCG00000022647 (pp) IPECJ2_ENSSSCG00000001423	Intra	0.982418	1	4.10718e-10	27446.5	0.982418	translocase of inner mitochondrial membrane 17 homolog B (yeast) [Source:HGNC Symbol;Acc:HGNC:17310]	negative elongation factor complex member E [Source:HGNC Symbol;Acc:HGNC:13974]
IPECJ2_ENSSSCG00000022647 (pp) IPECJ2_ENSSSCG00000029161	Intra	0.973626	1	4.59028e-09	24252.5	0.973626	translocase of inner mitochondrial membrane 17 homolog B (yeast) [Source:HGNC Symbol;Acc:HGNC:17310]	acireductone dioxygenase 1 [Source:HGNC Symbol;Acc:HGNC:30576]
IPECJ2_ENSSSCG00000028378 (pp) IPECJ2_ENSSSCG00000008583	Intra	0.956044	1	9.46978e-08	9305.5	0.956044	Unknown	intersectin 2 [Source:HGNC Symbol;Acc:HGNC:6184]
IPECJ2_ENSSSCG00000022647 (pp) IPECJ2_ENSSSCG00000001884	Intra	0.969231	1	3.28443e-06	21732.5	0.969231	translocase of inner mitochondrial membrane 17 homolog B (yeast) [Source:HGNC Symbol;Acc:HGNC:17310]	COMM domain containing 4 [Source:HGNC Symbol;Acc:HGNC:26027]
IPECJ2_ENSSSCG00000028378 (pp) IPECJ2_ENSSSCG00000011213	Intra	0.956044	1	9.46978e-08	9305.5	0.956044	Unknown	topoisomerase (DNA) II beta 180kDa [Source:RefSeq peptide;Acc:NP_001245315]
IPECJ2_ENSSSCG00000022647 (pp) IPECJ2_ENSSSCG00000007472	Intra	0.973626	1	1.97568e-06	24252.5	0.973626	translocase of inner mitochondrial membrane 17 homolog B (yeast) [Source:HGNC Symbol;Acc:HGNC:17310]	breast carcinoma amplified sequence 4 [Source:HGNC Symbol;Acc:HGNC:14367]
IPECJ2_ENSSSCG00000022647 (pp) IPECJ2_ENSSSCG00000025868	Intra	0.973626	1	1.97568e-06	24252.5	0.973626	translocase of inner mitochondrial membrane 17 homolog B (yeast) [Source:HGNC Symbol;Acc:HGNC:17310]	Unknown
IPECJ2_ENSSSCG00000022647 (pp) IPECJ2_ENSSSCG00000012965	Intra	0.964835	1	5.02606e-06	18397.5	0.964835	translocase of inner mitochondrial membrane 17 homolog B (yeast) [Source:HGNC Symbol;Acc:HGNC:17310]	DR1 associated protein 1 [Source:HGNC Symbol;Acc:HGNC:3019]
IPECJ2_ENSSSCG00000022647 (pp) IPECJ2_ENSSSCG00000025928	Intra	0.969231	1	3.28443e-06	21732.5	0.969231	translocase of inner mitochondrial membrane 17 homolog B (yeast) [Source:HGNC Symbol;Acc:HGNC:17310]	ribosomal protein L18 [Source:HGNC Symbol;Acc:HGNC:10310]
IPECJ2_ENSSSCG00000022647 (pp) IPECJ2_ENSSSCG00000029034	Intra	0.969231	1	3.28443e-06	21732.5	0.969231	translocase of inner mitochondrial membrane 17 homolog B (yeast) [Source:HGNC Symbol;Acc:HGNC:17310]	cytochrome c oxidase subunit 4I1 [Source:HGNC Symbol;Acc:HGNC:2265]
IPECJ2_ENSSSCG00000022647 (pp) IPECJ2_ENSSSCG00000029830	Intra	0.96044	1	7.40017e-06	14245.5	0.96044	translocase of inner mitochondrial membrane 17 homolog B (yeast) [Source:HGNC Symbol;Acc:HGNC:17310]	ribosomal protein L8 [Source:HGNC Symbol;Acc:HGNC:10368]
IPECJ2_ENSSSCG00000022647 (pp) IPECJ2_ENSSSCG00000012784	Intra	0.956044	1	1.04633e-05	9305.5	0.956044	translocase of inner mitochondrial membrane 17 homolog B (yeast) [Source:HGNC Symbol;Acc:HGNC:17310]	signal sequence receptor subunit 4 [Source:HGNC Symbol;Acc:HGNC:11326]
IPECJ2_ENSSSCG00000022647 (pp) IPECJ2_ENSSSCG00000026914	Intra	0.96044	1	5.08105e-08	14245.5	0.96044	translocase of inner mitochondrial membrane 17 homolog B (yeast) [Source:HGNC Symbol;Acc:HGNC:17310]	phospholipase A2 group XVI [Source:HGNC Symbol;Acc:HGNC:17825]
IPECJ2_ENSSSCG00000022647 (pp) IPECJ2_ENSSSCG00000027308	Intra	0.951648	1	1.66161e-07	3309.5	0.951648	translocase of inner mitochondrial membrane 17 homolog B (yeast) [Source:HGNC Symbol;Acc:HGNC:17310]	Unknown
IPECJ2_ENSSSCG00000022647 (pp) IPECJ2_ENSSSCG00000029362	Intra	0.951648	1	1.41528e-05	3309.5	0.951648	translocase of inner mitochondrial membrane 17 homolog B (yeast) [Source:HGNC Symbol;Acc:HGNC:17310]	charged multivesicular body protein 2A [Source:HGNC Symbol;Acc:HGNC:30216]
IPECJ2_ENSSSCG00000022647 (pp) IPECJ2_ENSSSCG00000026812	Intra	0.956044	1	1.04633e-05	9305.5	0.956044	translocase of inner mitochondrial membrane 17 homolog B (yeast) [Source:HGNC Symbol;Acc:HGNC:17310]	Unknown
IPECJ2_ENSSSCG00000022647 (pp) IPECJ2_ENSSSCG00000020817	Intra	0.951648	1	1.41528e-05	3309.5	0.951648	translocase of inner mitochondrial membrane 17 homolog B (yeast) [Source:HGNC Symbol;Acc:HGNC:17310]	40S ribosomal protein S16 [Source:UniProtKB/Swiss-Prot;Acc:Q29201]
IPECJ2_ENSSSCG00000003464 (pp) AscL3_gene_L3E_01572	Inter	0.964835	1	5.02606e-06	18397.5	0.964835	DnaJ heat shock protein family (Hsp40) member C16 [Source:HGNC Symbol;Acc:HGNC:29157]	Bm1034 OS=Brugia malayi GN=Bm1034 PE=4 SV=1
IPECJ2_ENSSSCG00000003464 (pp) IPECJ2_ENSSSCG00000009479	Intra	0.964835	1	5.02606e-06	18397.5	0.964835	DnaJ heat shock protein family (Hsp40) member C16 [Source:HGNC Symbol;Acc:HGNC:29157]	RNA binding motif protein 26 [Source:HGNC Symbol;Acc:HGNC:20327]
IPECJ2_ENSSSCG00000003464 (pp) IPECJ2_ENSSSCG00000025293	Intra	0.956044	1	9.46978e-08	9305.5	0.956044	DnaJ heat shock protein family (Hsp40) member C16 [Source:HGNC Symbol;Acc:HGNC:29157]	helicase like transcription factor [Source:HGNC Symbol;Acc:HGNC:11099]
IPECJ2_ENSSSCG00000003464 (pp) IPECJ2_ENSSSCG00000011213	Intra	0.964835	1	2.53041e-08	18397.5	0.964835	DnaJ heat shock protein family (Hsp40) member C16 [Source:HGNC Symbol;Acc:HGNC:29157]	topoisomerase (DNA) II beta 180kDa [Source:RefSeq peptide;Acc:NP_001245315]
IPECJ2_ENSSSCG00000003464 (pp) IPECJ2_ENSSSCG00000023325	Intra	0.951648	-1	1.41528e-05	3309.5	-0.951648	DnaJ heat shock protein family (Hsp40) member C16 [Source:HGNC Symbol;Acc:HGNC:29157]	Aminoacylase-1 [Source:UniProtKB/Swiss-Prot;Acc:P37111]
IPECJ2_ENSSSCG00000003464 (pp) IPECJ2_ENSSSCG00000014044	Intra	0.951648	1	1.41528e-05	3309.5	0.951648	DnaJ heat shock protein family (Hsp40) member C16 [Source:HGNC Symbol;Acc:HGNC:29157]	nuclear receptor binding SET domain protein 1 [Source:HGNC Symbol;Acc:HGNC:14234]
IPECJ2_ENSSSCG00000003670 (pp) IPECJ2_ENSSSCG00000015972	Intra	0.969231	1	1.14652e-08	21732.5	0.969231	rearranged L-myc fusion [Source:HGNC Symbol;Acc:HGNC:10025]	Unknown
IPECJ2_ENSSSCG00000003670 (pp) AscL3_gene_L3E_01572	Inter	0.956044	1	1.04633e-05	9305.5	0.956044	rearranged L-myc fusion [Source:HGNC Symbol;Acc:HGNC:10025]	Bm1034 OS=Brugia malayi GN=Bm1034 PE=4 SV=1
IPECJ2_ENSSSCG00000003670 (pp) IPECJ2_ENSSSCG00000003727	Intra	0.956044	1	9.46978e-08	9305.5	0.956044	rearranged L-myc fusion [Source:HGNC Symbol;Acc:HGNC:10025]	Isoform 2 of Trafficking protein particle complex subunit 8 OS=Homo sapiens GN=TRAPPC8
IPECJ2_ENSSSCG00000014283 (pp) IPECJ2_ENSSSCG00000009479	Intra	0.986813	1	7.37952e-11	28223.5	0.986813	kinesin family member 3A [Source:HGNC Symbol;Acc:HGNC:6319]	RNA binding motif protein 26 [Source:HGNC Symbol;Acc:HGNC:20327]
IPECJ2_ENSSSCG00000003670 (pp) IPECJ2_ENSSSCG00000011857	Intra	0.96044	1	5.08105e-08	14245.5	0.96044	rearranged L-myc fusion [Source:HGNC Symbol;Acc:HGNC:10025]	leishmanolysin like peptidase [Source:HGNC Symbol;Acc:HGNC:15991]
IPECJ2_ENSSSCG00000014283 (pp) IPECJ2_ENSSSCG00000025293	Intra	0.969231	1	1.14652e-08	21732.5	0.969231	kinesin family member 3A [Source:HGNC Symbol;Acc:HGNC:6319]	helicase like transcription factor [Source:HGNC Symbol;Acc:HGNC:11099]
IPECJ2_ENSSSCG00000003670 (pp) IPECJ2_ENSSSCG00000008600	Intra	0.956044	1	1.04633e-05	9305.5	0.956044	rearranged L-myc fusion [Source:HGNC Symbol;Acc:HGNC:10025]	pumilio RNA binding family member 2 [Source:HGNC Symbol;Acc:HGNC:14958]
IPECJ2_ENSSSCG00000003670 (pp) IPECJ2_ENSSSCG00000015201	Intra	0.956044	1	9.46978e-08	9305.5	0.956044	rearranged L-myc fusion [Source:HGNC Symbol;Acc:HGNC:10025]	Uncharacterized protein OS=Sus scrofa GN=MSANTD2 PE=4 SV=1
IPECJ2_ENSSSCG00000014283 (pp) IPECJ2_XLOC_023587	Intra	0.969231	-1	1.14652e-08	21732.5	-0.969231	kinesin family member 3A [Source:HGNC Symbol;Acc:HGNC:6319]	IL-23 (Fragment) OS=Sus scrofa PE=2 SV=1
IPECJ2_ENSSSCG00000014283 (pp) IPECJ2_ENSSSCG00000025928	Intra	0.956044	-1	9.46978e-08	9305.5	-0.956044	kinesin family member 3A [Source:HGNC Symbol;Acc:HGNC:6319]	ribosomal protein L18 [Source:HGNC Symbol;Acc:HGNC:10310]
IPECJ2_ENSSSCG00000014283 (pp) IPECJ2_ENSSSCG00000029034	Intra	0.956044	-1	9.46978e-08	9305.5	-0.956044	kinesin family member 3A [Source:HGNC Symbol;Acc:HGNC:6319]	cytochrome c oxidase subunit 4I1 [Source:HGNC Symbol;Acc:HGNC:2265]
IPECJ2_ENSSSCG00000014283 (pp) IPECJ2_XLOC_029898	Intra	0.964835	-1	2.53041e-08	18397.5	-0.964835	kinesin family member 3A [Source:HGNC Symbol;Acc:HGNC:6319]	Proteasome subunit beta type-7 OS=Sus scrofa GN=PSMB7 PE=2 SV=2
IPECJ2_ENSSSCG00000014283 (pp) IPECJ2_ENSSSCG00000019018	Intra	0.956044	-1	9.46978e-08	9305.5	-0.956044	kinesin family member 3A [Source:HGNC Symbol;Acc:HGNC:6319]	Unknown

## Sheet: GEN Cluster
Cluster	Score (Density*#Nodes)	Nodes	Edges	Node IDs
1	27.5	37	495	IPECJ2_ENSSSCG00000023139, IPECJ2_ENSSSCG00000012916, IPECJ2_ENSSSCG00000012784, IPECJ2_ENSSSCG00000012727, IPECJ2_ENSSSCG00000012842, IPECJ2_ENSSSCG00000010063, IPECJ2_ENSSSCG00000026812, IPECJ2_ENSSSCG00000027971, IPECJ2_ENSSSCG00000007472, IPECJ2_ENSSSCG00000029830, IPECJ2_ENSSSCG00000027840, IPECJ2_ENSSSCG00000001884, IPECJ2_ENSSSCG00000010865, IPECJ2_ENSSSCG00000007160, IPECJ2_ENSSSCG0000002…
2	10	16	75	AscL3_gene_GS_09942, IPECJ2_ENSSSCG00000026914, IPECJ2_ENSSSCG00000013619, IPECJ2_ENSSSCG00000006777, IPECJ2_ENSSSCG00000015786, IPECJ2_ENSSSCG00000027308, IPECJ2_ENSSSCG00000014177, IPECJ2_ENSSSCG00000017114, IPECJ2_ENSSSCG00000027827, IPECJ2_XLOC_007562, IPECJ2_ENSSSCG00000029855, IPECJ2_ENSSSCG00000007281, IPECJ2_ENSSSCG00000007189, IPECJ2_ENSSSCG00000024254, IPECJ2_ENSSSCG00000023325, IPECJ2_…
3	4.5	5	9	IPECJ2_ENSSSCG00000025284, IPECJ2_ENSSSCG00000008412, IPECJ2_ENSSSCG00000006894, IPECJ2_ENSSSCG00000002502, AscL3_gene_GS_05602
4	4.444	10	20	IPECJ2_ENSSSCG00000008762, IPECJ2_ENSSSCG00000015386, IPECJ2_ENSSSCG00000021542, IPECJ2_ENSSSCG00000000769, IPECJ2_ENSSSCG00000003670, IPECJ2_ENSSSCG00000015201, AscL3_gene_L3E_01572, IPECJ2_ENSSSCG00000024984, IPECJ2_XLOC_023587, IPECJ2_ENSSSCG00000025293
5	4.333	7	13	IPECJ2_ENSSSCG00000017308, AscL3_gene_GS_11251, IPECJ2_XLOC_010959, IPECJ2_ENSSSCG00000014076, IPECJ2_ENSSSCG00000000921, IPECJ2_ENSSSCG00000001922, IPECJ2_ENSSSCG00000007331
6	4	4	6	IPECJ2_ENSSSCG00000005097, IPECJ2_ENSSSCG00000006090, AscL3_gene_GS_13356, IPECJ2_ENSSSCG00000022417
7	3.333	4	5	IPECJ2_ENSSSCG00000015972, IPECJ2_ENSSSCG00000008600, IPECJ2_ENSSSCG00000003727, IPECJ2_ENSSSCG00000023960
8	3.333	4	5	IPECJ2_ENSSSCG00000005173, IPECJ2_ENSSSCG00000009077, IPECJ2_ENSSSCG00000031053, AscL3_gene_GS_04442
9	3	3	3	IPECJ2_ENSSSCG00000023110, IPECJ2_ENSSSCG00000003080, IPECJ2_XLOC_005381
10	3	3	3	IPECJ2_ENSSSCG00000011857, AscL3_gene_GS_06168, IPECJ2_ENSSSCG00000017673
11	3	3	3	IPECJ2_ENSSSCG00000006530, IPECJ2_ENSSSCG00000024201, AscL3_gene_GS_23463
12	3	3	3	IPECJ2_ENSSSCG00000003807, AscL3_gene_GS_04314, IPECJ2_ENSSSCG00000010968
13	3	5	6	IPECJ2_XLOC_029191, AscL3_gene_GS_03432, IPECJ2_ENSSSCG00000022801, IPECJ2_ENSSSCG00000015497, IPECJ2_ENSSSCG00000000167
14	3	3	3	AscL3_gene_GS_20549, AscL3_XLOC_024104, IPECJ2_ENSSSCG00000012556
15	3	3	3	IPECJ2_ENSSSCG00000011862, AscL3_gene_L3E_02947, IPECJ2_ENSSSCG00000023467
